# Supplementary material for: Genome Comparisons of the Fission Yeasts Reveal Ancient Collinear Loci Maintained by Natural Selection
Source: J Fungi (Basel). 2021 Oct 14;7(10):864. doi: 10.3390/jof7100864 (PMC8537764; doi:10.3390/jof7100864)
Supplement: Supplementary file 1 [file jof-07-00864-s001.zip › Supplementary tables.xlsx]

## Sheet: Table of contents
Table of contents
Supplementary table S1: List of species used in this study.
Supplementary table S2: Raw data of pairwise YASS alignment of S. japonicus and S. pombe.
Supplementary table S3: Raw data of pairwise YASS alignment of S. japonicus and S. cryophilus.
Supplementary table S4: Raw data of pairwise YASS alignment of S. japonicus and S. octosporus.
Supplementary table S5: Filtered data of pairwise YASS alignment of S. japonicus and S. pombe.
Supplementary table S6: Filtered data of pairwise YASS alignment of S. japonicus and S. cryophilus.
Supplementary table S7: Filtered data of pairwise YASS alignment of S. japonicus and S. octosporus.
Supplementary table S8: Descriptive statistics of the pairwise YASS alignments.
Supplementary table S9: Putative orthologues of the fission yeasts. aLCBs are highlighted with yellow and orange colours. Note: Since we concentrated mainly on collinear segments, orthologous genes from the subtelomeric regions were not collected in all species, because there was not any substantial collinearity found between S. pombe and S. japonicus in that regions.
Supplementary table S10: List of aLCBs relative to the gene order of S. pombe. Colourful highlights indicate the chromosomes where the actual aLCB is localised. Green: chromosome I, blue: chromosome II, peach-colour: chromosome III. NoG means number of genes situated in the actual aLCB. *: Supercontigs originated from the assembly and annotation presented by Rhind et al. [2].
Supplementary table S11: List of putative orthologous genes of the chosen species regarding to the 11 random aLCBs.
Supplementary table S12: List of the 26 common orthologous genes from the 14 species.
Supplementary table S13: Pairwise Spearman correlation of the different parameters of the species.
Supplementary table S14: Distribution of the genes from the main GO categories between aLCBs and NCBs (regions outside of the aLCBs). Those GO categories whose genes exceeded the 42.07% in the aLCBs are highlighted with green (>42.07%) and yellow (>50%).
Supplementary table S15: Randomisation and statistical evaluation of the gene enrichments from the 31 candidate GO categories.
Supplementary table S16: Rec12 cleavage site abundance in the aLCBs and in the NCBs. Significant GO categories are highlighted with green.
Supplementary table S17: Density of essential genes in the aLCBs and in the NCBs. Significant GO categories are highlighted with green.

## Sheet: S1
Phylum/Subphylum	Species names	Abbreviations	Strains	Chr counts	Genome size	Status	Links	Citation
Taphrinomycotina	Schizosaccharomyces japonicus	S. japonicus	yFS275	3	11.7332	Chrs	https://www.broadinstitute.org/scientific-community/science/projects/fungal-genome-initiative/schizosaccharomyces-genomes-project?genome_assembly_id=372073http%3A//genome.jgi.doe.gov/Yarli1/Yarli1.home.html%20http%3A//genome.jgi.doe.gov/Debha1/Debha1.home.html%20https%3A//www.ncbi.nlm.nih.gov/bioproject/12729%20https%3A//www.broadinstitute.org/scientific-community/science/projects/fungal-genome-i…	Rhind et al., 2011	Rhind N, Chen Z, Yassour M, Thompson DA, Haas BJ, Habib N, Wapinski I, Roy S, Lin MF, Heiman DI, Young SK, Furuya K, Guo Y, Pidoux A, Chen HM, Robbertse B, Goldberg JM, Aoki K, Bayne EH, Berlin AM, Desjardins CA, Dobbs E, Dukaj L, Fan L, FitzGerald MG, French C, Gujja S, Hansen K, Keifenheim D, Levin JZ, Mosher RA, Müller CA, Pfiffner J, Priest M, Russ C, Smialowska A, Swoboda P, Sykes SM, Vaughn…
Taphrinomycotina	Schizosaccharomyces pombe	S. pombe	972 h-	3	12.5913	Chrs	https://www.broadinstitute.org/scientific-community/science/projects/fungal-genome-initiative/schizosaccharomyces-genomes-project?genome_assembly_id=372073http%3A//genome.jgi.doe.gov/Yarli1/Yarli1.home.html%20http%3A//genome.jgi.doe.gov/Debha1/Debha1.home.html%20https%3A//www.ncbi.nlm.nih.gov/bioproject/12729%20https%3A//www.broadinstitute.org/scientific-community/science/projects/fungal-genome-i…	Rhind et al., 2011	Rhind N, Chen Z, Yassour M, Thompson DA, Haas BJ, Habib N, Wapinski I, Roy S, Lin MF, Heiman DI, Young SK, Furuya K, Guo Y, Pidoux A, Chen HM, Robbertse B, Goldberg JM, Aoki K, Bayne EH, Berlin AM, Desjardins CA, Dobbs E, Dukaj L, Fan L, FitzGerald MG, French C, Gujja S, Hansen K, Keifenheim D, Levin JZ, Mosher RA, Müller CA, Pfiffner J, Priest M, Russ C, Smialowska A, Swoboda P, Sykes SM, Vaughn…
Taphrinomycotina	Schizosaccharomyces octosporus	S. octosporus	yFS286	3	11.6345	Chrs	https://www.broadinstitute.org/scientific-community/science/projects/fungal-genome-initiative/schizosaccharomyces-genomes-project?genome_assembly_id=372073http%3A//genome.jgi.doe.gov/Yarli1/Yarli1.home.html%20http%3A//genome.jgi.doe.gov/Debha1/Debha1.home.html%20https%3A//www.ncbi.nlm.nih.gov/bioproject/12729%20https%3A//www.broadinstitute.org/scientific-community/science/projects/fungal-genome-i…	Rhind et al., 2011	Rhind N, Chen Z, Yassour M, Thompson DA, Haas BJ, Habib N, Wapinski I, Roy S, Lin MF, Heiman DI, Young SK, Furuya K, Guo Y, Pidoux A, Chen HM, Robbertse B, Goldberg JM, Aoki K, Bayne EH, Berlin AM, Desjardins CA, Dobbs E, Dukaj L, Fan L, FitzGerald MG, French C, Gujja S, Hansen K, Keifenheim D, Levin JZ, Mosher RA, Müller CA, Pfiffner J, Priest M, Russ C, Smialowska A, Swoboda P, Sykes SM, Vaughn…
Taphrinomycotina	Schizosaccharomyces cryophilus	S. cryophilus	OY26	3	11.5548	Chrs	https://www.broadinstitute.org/scientific-community/science/projects/fungal-genome-initiative/schizosaccharomyces-genomes-project	Rhind et al., 2011	Rhind N, Chen Z, Yassour M, Thompson DA, Haas BJ, Habib N, Wapinski I, Roy S, Lin MF, Heiman DI, Young SK, Furuya K, Guo Y, Pidoux A, Chen HM, Robbertse B, Goldberg JM, Aoki K, Bayne EH, Berlin AM, Desjardins CA, Dobbs E, Dukaj L, Fan L, FitzGerald MG, French C, Gujja S, Hansen K, Keifenheim D, Levin JZ, Mosher RA, Müller CA, Pfiffner J, Priest M, Russ C, Smialowska A, Swoboda P, Sykes SM, Vaughn…
Taphrinomycotina	Pneumocystis murina	P. murina	B123	17	7.50134	Chrs	https://www.broadinstitute.org/scientific-community/science/projects/fungal-genome-initiative/pneumocystis-genome-project	Ma L et al., 2016	Ma L, Chen Z, Huang da W, Kutty G, Ishihara M, Wang H, Abouelleil A, Bishop L, Davey E, Deng R, Deng X, Fan L, Fantoni G, Fitzgerald M, Gogineni E, Goldberg JM, Handley G, Hu X, Huber C, Jiao X, Jones K, Levin JZ, Liu Y, Macdonald P, Melnikov A, Raley C, Sassi M, Sherman BT, Song X, Sykes S, Tran B, Walsh L, Xia Y, Yang J, Young S, Zeng Q, Zheng X, Stephens R, Nusbaum C, Birren BW, Azadi P, Lempi…
Taphrinomycotina	Saitoella complicata	S. complicata	NRRL Y-17804 v1.0	-	14.1362	Draft	https://mycocosm.jgi.doe.gov/Saico1/Saico1.home.html	Riley et al., 2016	Riley R, Haridas S, Wolfe KH, Lopes MR, Hittinger CT, Göker M, Salamov AA, Wisecaver JH, Long TM, Calvey CH, Aerts AL, Barry KW, Choi C, Clum A, Coughlan AY, Deshpande S, Douglass AP, Hanson SJ, Klenk HP, LaButti KM, Lapidus A, Lindquist EA, Lipzen AM, Meier-Kolthoff JP, Ohm RA, Otillar RP, Pangilinan JL, Peng Y, Rokas A, Rosa CA, Scheuner C, Sibirny AA, Slot JC, Stielow JB, Sun H, Kurtzman CP, B…
Taphrinomycotina	Taphrina deformans	T. deformans	PYCC 5710	-	13.7735	Draft	https://mycocosm.jgi.doe.gov/Tapde1_1/Tapde1_1.home.html	Cisse et al., 2013	Cissé OH, Almeida JM, Fonseca A, Kumar AA, Salojärvi J, Overmyer K, Hauser PM, Pagni M. Genome sequencing of the plant pathogen Taphrina deformans, the causal agent of peach leaf curl. mBio. 2013 Apr 30;4(3):e00055-13. doi: 10.1128/mBio.00055-13. PMID: 23631913; PMCID: PMC3648899.
Taphrinomycotina	Protomyces lactucae-debilis	P. lactucae-debilis	12-1054	-	12.93	Draft	https://www.ncbi.nlm.nih.gov/genome/100153?genome_assembly_id=1597601	Mondo et al., 2017	Mondo SJ, Dannebaum RO, Kuo RC, Louie KB, Bewick AJ, LaButti K, Haridas S, Kuo A, Salamov A, Ahrendt SR, Lau R, Bowen BP, Lipzen A, Sullivan W, Andreopoulos BB, Clum A, Lindquist E, Daum C, Northen TR, Kunde-Ramamoorthy G, Schmitz RJ, Gryganskyi A, Culley D, Magnuson J, James TY, O'Malley MA, Stajich JE, Spatafora JW, Visel A, Grigoriev IV. Widespread adenine N6-methylation of active genes in fun…
Taphrinomycotina	Neolecta irregularis	N. irregularis	DAH-3	-	14.18	Draft	https://www.ncbi.nlm.nih.gov/genome/14172?genome_assembly_id=298899	Nguyen et al., 2017	Nguyen TA, Cissé OH, Yun Wong J, Zheng P, Hewitt D, Nowrousian M, Stajich JE, Jedd G. Innovation and constraint leading to complex multicellularity in the Ascomycota. Nat Commun. 2017 Feb 8;8:14444. doi: 10.1038/ncomms14444. PMID: 28176784; PMCID: PMC5309816.
Pezyzomycotina	Aspergillus nidulans	A. nidulans	FGSC A4	8	29.8283	Chrs	http://www.aspergillusgenome.org/download/sequence/A_nidulans_FGSC_A4/current/	Galagan et al., 2005	Galagan JE, Calvo SE, Cuomo C, Ma LJ, Wortman JR, Batzoglou S, Lee SI, Baştürkmen M, Spevak CC, Clutterbuck J, Kapitonov V, Jurka J, Scazzocchio C, Farman M, Butler J, Purcell S, Harris S, Braus GH, Draht O, Busch S, D'Enfert C, Bouchier C, Goldman GH, Bell-Pedersen D, Griffiths-Jones S, Doonan JH, Yu J, Vienken K, Pain A, Freitag M, Selker EU, Archer DB, Peñalva MA, Oakley BR, Momany M, Tanaka T…
Pezyzomycotina	Neurospora crassa	N. crassa	OR74A	7	41.1024	Chrs	https://www.ncbi.nlm.nih.gov/assembly/GCA_000182925.2	Galagan et al., 2003	Galagan JE, Calvo SE, Borkovich KA, Selker EU, Read ND, Jaffe D, FitzHugh W, Ma LJ, Smirnov S, Purcell S, Rehman B, Elkins T, Engels R, Wang S, Nielsen CB, Butler J, Endrizzi M, Qui D, Ianakiev P, Bell-Pedersen D, Nelson MA, Werner-Washburne M, Selitrennikoff CP, Kinsey JA, Braun EL, Zelter A, Schulte U, Kothe GO, Jedd G, Mewes W, Staben C, Marcotte E, Greenberg D, Roy A, Foley K, Naylor J, Stang…
Pezyzomycotina	Botrytis cinerea	B. cinerea	B05.10	16	42.6301	Chrs	https://www.ncbi.nlm.nih.gov/genome/494?genome_assembly_id=372073	Anselem et al., 2011	Amselem J, Cuomo CA, van Kan JA, Viaud M, Benito EP, Couloux A, Coutinho PM, de Vries RP, Dyer PS, Fillinger S, Fournier E, Gout L, Hahn M, Kohn L, Lapalu N, Plummer KM, Pradier JM, Quévillon E, Sharon A, Simon A, ten Have A, Tudzynski B, Tudzynski P, Wincker P, Andrew M, Anthouard V, Beever RE, Beffa R, Benoit I, Bouzid O, Brault B, Chen Z, Choquer M, Collémare J, Cotton P, Danchin EG, Da Silva …
Saccharomycotina	Yarrowia lipolytica	Y. lipolytica	CLIB122	6	20.5509	Chrs	https://mycocosm.jgi.doe.gov/Yarli1/Yarli1.home.html	Dujon et al., 2004	Dujon B, Sherman D, Fischer G, Durrens P, Casaregola S, Lafontaine I, De Montigny J, Marck C, Neuvéglise C, Talla E, Goffard N, Frangeul L, Aigle M, Anthouard V, Babour A, Barbe V, Barnay S, Blanchin S, Beckerich JM, Beyne E, Bleykasten C, Boisramé A, Boyer J, Cattolico L, Confanioleri F, De Daruvar A, Despons L, Fabre E, Fairhead C, Ferry-Dumazet H, Groppi A, Hantraye F, Hennequin C, Jauniaux N,…
Saccharomycotina	Debaroymyces hansenii	D. hansenii	CBS76	8	12.1819	Chrs	https://mycocosm.jgi.doe.gov/Debha1/Debha1.home.html	Sacerdot et al., 2008	Sacerdot C, Casaregola S, Lafontaine I, Tekaia F, Dujon B, Ozier-Kalogeropoulos O. Promiscuous DNA in the nuclear genomes of hemiascomycetous yeasts. FEMS Yeast Res. 2008 Sep;8(6):846-57. doi: 10.1111/j.1567-1364.2008.00409.x. Epub 2008 Jul 30. PMID: 18673395.
Saccharomycotina	Meyerozima guilliermondii	M. guilliermondii	ATCC 6260	-	10.61	Draft	https://www.ncbi.nlm.nih.gov/bioproject/12729	Butler et al., 2009	Butler G, Rasmussen MD, Lin MF, Santos MA, Sakthikumar S, Munro CA, Rheinbay E, Grabherr M, Forche A, Reedy JL, Agrafioti I, Arnaud MB, Bates S, Brown AJ, Brunke S, Costanzo MC, Fitzpatrick DA, de Groot PW, Harris D, Hoyer LL, Hube B, Klis FM, Kodira C, Lennard N, Logue ME, Martin R, Neiman AM, Nikolaou E, Quail MA, Quinn J, Santos MC, Schmitzberger FF, Sherlock G, Shah P, Silverstein KA, Skrzype…
Basidiomycota	Cryptococcus gattii	C. gattii	R265	14	18.3748	Chrs	https://www.broadinstitute.org/scientific-community/science/projects/fungal-genome-initiative/cryptococcus-gattii-genome-project-0	D'Souza et al., 2011; Farrer et al., 2015	D'Souza CA, Kronstad JW, Taylor G, Warren R, Yuen M, Hu G, Jung WH, Sham A, Kidd SE, Tangen K, Lee N, Zeilmaker T, Sawkins J, McVicker G, Shah S, Gnerre S, Griggs A, Zeng Q, Bartlett K, Li W, Wang X, Heitman J, Stajich JE, Fraser JA, Meyer W, Carter D, Schein J, Krzywinski M, Kwon-Chung KJ, Varma A, Wang J, Brunham R, Fyfe M, Ouellette BF, Siddiqui A, Marra M, Jones S, Holt R, Birren BW, Galagan …	Farrer RA, Desjardins CA, Sakthikumar S, Gujja S, Saif S, Zeng Q, Chen Y, Voelz K, Heitman J, May RC, Fisher MC, Cuomo CA. Genome Evolution and Innovation across the Four Major Lineages of Cryptococcus gattii. mBio. 2015 Sep 1;6(5):e00868-15. doi: 10.1128/mBio.00868-15. PMID: 26330512; PMCID: PMC4556806.
Basidiomycota	Ustilago maydis	U. maydis	521	23	19.6644	Chrs	https://mycocosm.jgi.doe.gov/Ustma1/Ustma1.home.html	Kamper et al., 2006	Kämper J, Kahmann R, Bölker M, Ma LJ, Brefort T, Saville BJ, Banuett F, Kronstad JW, Gold SE, Müller O, Perlin MH, Wösten HA, de Vries R, Ruiz-Herrera J, Reynaga-Peña CG, Snetselaar K, McCann M, Pérez-Martín J, Feldbrügge M, Basse CW, Steinberg G, Ibeas JI, Holloman W, Guzman P, Farman M, Stajich JE, Sentandreu R, González-Prieto JM, Kennell JC, Molina L, Schirawski J, Mendoza-Mendoza A, Greiling…
Mucoromycotina	Rhizopus oryzea	R. oryzea	99-880	-	39.0638	Draft	https://mycocosm.jgi.doe.gov/Rhior3/Rhior3.home.html	Ma et al., 2009	Ma LJ, Ibrahim AS, Skory C, Grabherr MG, Burger G, Butler M, Elias M, Idnurm A, Lang BF, Sone T, Abe A, Calvo SE, Corrochano LM, Engels R, Fu J, Hansberg W, Kim JM, Kodira CD, Koehrsen MJ, Liu B, Miranda-Saavedra D, O'Leary S, Ortiz-Castellanos L, Poulter R, Rodriguez-Romero J, Ruiz-Herrera J, Shen YQ, Zeng Q, Galagan J, Birren BW, Cuomo CA, Wickes BL. Genomic analysis of the basal lineage fungus…

## Sheet: S2
	Positions							Statistics
#	S. japonicus (Sj)		S. pombe (Sp)		Sj	Sp	sense	Evalue	score
	Start	Stop	Start	Stop	size	size
1	8166005	8160098	12559921	12566192	5908	6272	reverse	0	18398
2	8168622	8174493	10124939	10131207	5872	6269	forward	0	18318
3	8168622	8174493	10135809	10142077	5872	6269	forward	0	18318
4	8911502	8918590	2650733	2657827	7089	7095	forward	0	17114
5	8174493	8168622	12559921	12566189	5872	6269	reverse	0	16782
6	7479193	7485477	3303668	3309955	6285	6288	forward	0	14505
7	2283629	2289836	739306	745530	6208	6225	forward	0	12925
8	5139139	5145673	1246264	1252824	6535	6561	forward	0	12851
9	7358556	7364748	3900363	3906555	6193	6193	forward	0	12231
10	8177111	8180559	10124936	10128473	3449	3538	forward	0	12001
11	8177111	8180559	10135806	10139343	3449	3538	forward	0	12001
12	6395168	6400515	2567230	2572580	5348	5351	forward	0	11440
13	1339460	1332438	6494393	6501418	7023	7026	reverse	0	11239
14	8160098	8163572	10124936	10128485	3475	3550	forward	0	10908
15	8160098	8163572	10135806	10139355	3475	3550	forward	0	10908
16	10361236	10366112	7170942	7175827	4877	4886	forward	0	10712
17	8180559	8177111	12562655	12566192	3449	3538	reverse	0	10613
18	1374242	1377509	11804551	11807814	3268	3264	forward	0	10300
19	4520546	4515414	12368384	12373516	5133	5133	reverse	0	10009
20	272996	268163	7930569	7935397	4834	4829	reverse	0	9830
21	7553804	7550085	850636	854358	3720	3723	reverse	0	9815
22	394670	389830	3339339	3344174	4841	4836	reverse	0	9664
23	8188762	8185394	12562643	12566188	3369	3546	reverse	0	9599
24	8185608	8188762	10125184	10128485	3155	3302	forward	0	9192
25	8185608	8188762	10136054	10139355	3155	3302	forward	0	9192
26	4808372	4803303	8706968	8712084	5070	5117	reverse	0	9165
27	10275263	10272494	3871858	3874625	2770	2768	reverse	0	8653
28	9179741	9182423	3871931	3874613	2683	2683	forward	0	8598
29	5704661	5699843	3053599	3058436	4819	4838	reverse	0	8582
30	6731954	6734521	10656223	10658790	2568	2568	forward	0	8414
31	9796769	9794242	10656263	10658790	2528	2528	reverse	0	8381
32	9794184	9796772	2907645	2910232	2589	2588	forward	0	8371
33	6734521	6731969	2907702	2910258	2553	2557	reverse	0	8342
34	3399962	3396685	9620869	9624150	3278	3282	reverse	0	8141
35	5678472	5682011	7587221	7590777	3540	3557	forward	0	8085
36	3293474	3297031	7769969	7773524	3558	3556	forward	0	7791
37	3024803	3021934	7876598	7879472	2870	2875	reverse	0	7647
38	8164107	8166005	10129284	10131207	1899	1924	forward	0	7400
39	8164107	8166005	10140154	10142077	1899	1924	forward	0	7400
40	9483554	9478481	4884196	4889275	5074	5080	reverse	0	7294
41	10985649	10988920	5149010	5152278	3272	3269	forward	0	7259
42	9630794	9627550	2804501	2807744	3245	3244	reverse	0	7210
43	2421409	2416498	9323631	9328515	4912	4885	reverse	0	7141
44	5610577	5613767	6948291	6951484	3191	3194	forward	0	7094
45	8189261	8191134	10129284	10131207	1874	1924	forward	0	7055
46	8189261	8191134	10140154	10142077	1874	1924	forward	0	7055
47	6472318	6476564	6829246	6833492	4247	4247	forward	0	7043
48	8191134	8189261	12559921	12561844	1874	1924	reverse	0	7013
49	8182983	8181161	12559921	12561776	1823	1856	reverse	0	7011
50	4654650	4660201	8656467	8661996	5552	5530	forward	0	7003
51	8181161	8182983	10129352	10131207	1823	1856	forward	0	7002
52	8181161	8182983	10140222	10142077	1823	1856	forward	0	7002
53	2126258	2130982	4375614	4380342	4725	4729	forward	0	6904
54	5224464	5218268	1326615	1333030	6197	6416	reverse	0	6853
55	691207	695965	9250736	9255398	4759	4663	forward	0	6601
56	2483617	2487851	3739178	3743421	4235	4244	forward	0	6529
57	6039866	6043983	1124474	1128594	4118	4121	forward	0	6515
58	9292828	9290892	12176176	12178124	1937	1949	reverse	0	6514
59	10265765	10263642	3888774	3890894	2124	2121	reverse	0	6499
60	7194764	7191965	9191528	9194323	2800	2796	reverse	0	6461
61	3332026	3329263	6677452	6680215	2764	2764	reverse	0	6445
62	5193235	5195803	1306376	1308941	2569	2566	forward	0	6347
63	5206877	5203854	1345048	1348073	3024	3026	reverse	0	6245
64	4985544	4983638	6685525	6687431	1907	1907	reverse	0	6241
65	7475685	7477646	12176161	12178123	1962	1963	forward	0	6235
66	437680	432469	1458729	1463940	5212	5212	reverse	0	6111
67	10682147	10683992	6685586	6687431	1846	1846	forward	0	6100
68	5059683	5066152	1778545	1785093	6470	6549	forward	0	6080
69	2183141	2180532	4333170	4335779	2610	2610	reverse	0	6075
70	1532066	1528983	8323251	8326288	3084	3038	reverse	0	6060
71	7053457	7056113	10912479	10915135	2657	2657	forward	0	6058
72	7517030	7520103	2195577	2198668	3074	3092	forward	0	6057
73	5875644	5872398	9732477	9735727	3247	3251	reverse	0	5988
74	1733341	1730120	8833359	8836578	3222	3220	reverse	0	5975
75	791704	794593	7460017	7462894	2890	2878	forward	0	5948
76	5708675	5706431	3048418	3050664	2245	2247	reverse	0	5894
77	10188758	10186140	8482334	8484955	2619	2622	reverse	0	5888
78	10239384	10236226	5378798	5381974	3159	3177	reverse	0	5841
79	3549776	3554748	4691912	4697037	4973	5126	forward	0	5836
80	7056106	7053437	3871932	3874603	2670	2672	reverse	0	5829
81	6287676	6290931	1201070	1204329	3256	3260	forward	0	5823
82	9920680	9924078	4201958	4205359	3399	3402	forward	0	5796
83	5492836	5498514	12019553	12025225	5679	5673	forward	0	5796
84	7258764	7261406	6207666	6210308	2643	2643	forward	0	5718
85	8189746	8191134	10118937	10120337	1389	1401	forward	0	5711
86	10832780	10836862	9141769	9145967	4083	4199	forward	0	5679
87	7616241	7613324	6604105	6607019	2918	2915	reverse	0	5653
88	9290894	9292859	2295820	2297790	1966	1971	forward	0	5625
89	8555217	8557472	4227310	4229565	2256	2256	forward	0	5610
90	2957615	2963973	2266034	2272503	6359	6470	forward	0	5552
91	8164620	8166005	10118937	10120337	1386	1401	forward	0	5531
92	8173114	8174493	10118937	10120337	1380	1401	forward	0	5524
93	423797	421518	1478634	1480928	2280	2295	reverse	0	5503
94	7477618	7475664	2295832	2297791	1955	1960	reverse	0	5493
95	7889312	7893217	10704870	10708790	3906	3921	forward	0	5460
96	2528505	2531486	9468050	9471035	2982	2986	forward	0	5418
97	10746870	10749468	3541490	3544088	2599	2599	forward	0	5396
98	3749506	3745211	10689238	10693321	4296	4084	reverse	0	5394
99	10942515	10946474	136322	140284	3960	3963	forward	0	5382
100	5703851	5700988	12369132	12371995	2864	2864	reverse	0	5371
101	9182394	9179745	10912478	10915124	2650	2647	reverse	0	5370
102	8362058	8359098	5100435	5103407	2961	2973	reverse	0	5284
103	7256585	7258042	6205255	6206714	1458	1460	forward	0	5282
104	7257954	7256585	4095199	4096568	1370	1370	reverse	0	5259
105	8181616	8182983	10118937	10120337	1368	1401	forward	0	5222
106	7256572	7257955	10387034	10388420	1384	1387	forward	0	5218
107	172414	173807	4095191	4096587	1394	1397	forward	0	5214
108	10690285	10687445	1415885	1418753	2841	2869	reverse	0	5212
109	1290831	1287664	2079278	2082448	3168	3171	reverse	0	5202
110	8768600	8765488	6280963	6284066	3113	3104	reverse	0	5182
111	4995254	4997508	4440115	4442375	2255	2261	forward	0	5177
112	5658710	5655522	7556473	7559661	3189	3189	reverse	0	5169
113	173804	172344	10387034	10388497	1461	1464	reverse	0	5167
114	7147179	7149743	11019507	11022074	2565	2568	forward	0	5155
115	173791	172422	6205255	6206624	1370	1370	reverse	0	5151
116	3041915	3039726	7858891	7861093	2190	2203	reverse	0	5139
117	2519698	2522203	9459462	9461952	2506	2491	forward	0	5102
118	10535279	10537951	2147346	2150009	2673	2664	forward	0	5097
119	7405787	7408655	8898991	8901868	2869	2878	forward	0	5074
120	3501340	3506203	6485457	6490272	4864	4816	forward	0	5064
121	4512039	4509189	12379666	12382515	2851	2850	reverse	0	5046
122	2210610	2212857	664778	667025	2248	2248	forward	0	5040
123	11017820	11013367	2219267	2223711	4454	4445	reverse	0	5025
124	6293104	6295371	1206941	1209206	2268	2266	forward	0	4978
125	9533919	9531307	7250251	7252848	2613	2598	reverse	0	4941
126	5730738	5735115	1404625	1408972	4378	4348	forward	0	4939
127	9784677	9788101	2898252	2901694	3425	3443	forward	0	4927
128	6044612	6047587	1129860	1132819	2976	2960	forward	0	4923
129	7698170	7695632	3931308	3933854	2539	2547	reverse	0	4920
130	10160391	10162365	1726075	1728036	1975	1962	forward	0	4910
131	10645872	10644359	4095049	4096587	1514	1539	reverse	0	4906
132	3156609	3154405	7633354	7635558	2205	2205	reverse	0	4859
133	8380068	8382276	4310546	4312762	2209	2217	forward	0	4859
134	548973	546711	6770530	6772795	2263	2266	reverse	0	4840
135	6376881	6379401	2580245	2582750	2521	2506	forward	0	4824
136	9708350	9705324	2713285	2716319	3027	3035	reverse	0	4819
137	1142147	1139703	8893459	8895898	2445	2440	reverse	0	4806
138	10644245	10645740	6205122	6206638	1496	1517	forward	0	4795
139	11168265	11165840	1064195	1066626	2426	2432	reverse	0	4791
140	10272939	10275202	10912876	10915135	2264	2260	forward	0	4744
141	10644337	10645726	10387007	10388419	1390	1413	forward	0	4733
142	1549843	1547678	8302418	8304581	2166	2164	reverse	0	4714
143	7749052	7747003	8165662	8167711	2050	2050	reverse	0	4675
144	10026694	10023620	3432359	3435393	3075	3035	reverse	0	4669
145	7812423	7810228	839190	841390	2196	2201	reverse	0	4664
146	2667365	2669342	1183326	1185303	1978	1978	forward	0	4650
147	7850842	7848198	801311	803958	2645	2648	reverse	0	4637
148	4924110	4926307	1761982	1764200	2198	2219	forward	0	4637
149	9386234	9384186	8859081	8861129	2049	2049	reverse	0	4636
150	8541648	8545606	4212725	4216665	3959	3941	forward	0	4607
151	2447561	2445297	9296778	9299054	2265	2277	reverse	0	4592
152	6622214	6619986	5786193	5788417	2229	2225	reverse	0	4563
153	7237263	7240352	6187325	6190396	3090	3072	forward	0	4562
154	4519802	4515810	3054406	3058406	3993	4001	reverse	0	4546
155	3245628	3247400	7750990	7752765	1773	1776	forward	0	4517
156	3099144	3101687	6452518	6455058	2544	2541	forward	0	4512
157	8875959	8873914	1918118	1920160	2046	2043	reverse	0	4500
158	3037506	3035774	7863745	7865477	1733	1733	reverse	0	4488
159	779406	781923	3680589	3683079	2518	2491	forward	0	4481
160	5584329	5586320	11142095	11144089	1992	1995	forward	0	4475
161	9478396	9481654	12368403	12371703	3259	3301	forward	0	4472
162	2560554	2558903	9500936	9502587	1652	1652	reverse	0	4461
163	7938955	7941661	5819502	5822208	2707	2707	forward	0	4435
164	1704649	1701635	224662	227679	3015	3018	reverse	0	4419
165	272582	269632	12369138	12372085	2951	2948	reverse	0	4414
166	9616448	9614455	2821441	2823440	1994	2000	reverse	0	4394
167	935343	937405	10753651	10755703	2063	2053	forward	0	4391
168	9224249	9220746	7746149	7749634	3504	3486	reverse	0	4389
169	3946206	3949534	3135113	3138432	3329	3320	forward	0	4383
170	977978	980168	10639371	10641562	2191	2192	forward	0	4370
171	3903616	3907757	7976442	7980592	4142	4151	forward	0	4338
172	8519891	8521651	11066766	11068526	1761	1761	forward	0	4336
173	7383922	7385623	2351370	2353071	1702	1702	forward	0	4326
174	7900815	7903512	182981	185714	2698	2734	forward	0	4324
175	3301178	3302530	7780346	7781691	1353	1346	forward	0	4320
176	9942669	9940508	1518898	1521056	2162	2159	reverse	0	4317
177	1489778	1488251	3845001	3846518	1528	1518	reverse	0	4311
178	5866915	5865173	9744269	9746010	1743	1742	reverse	0	4311
179	9430040	9432083	8411049	8413107	2044	2059	forward	0	4292
180	8803003	8804679	6314549	6316222	1677	1674	forward	0	4286
181	7017702	7014877	10828387	10831224	2826	2838	reverse	0	4281
182	10251497	10253768	5431859	5434130	2272	2272	forward	0	4261
183	11184997	11183657	7780359	7781700	1341	1342	reverse	0	4258
184	5975054	5979459	11365964	11370464	4406	4501	forward	0	4255
185	1379888	1381847	11827187	11829146	1960	1960	forward	0	4252
186	1747853	1745296	11495518	11498069	2558	2552	reverse	0	4223
187	9622187	9618379	2815878	2819629	3809	3752	reverse	0	4220
188	7602661	7600226	9550762	9553193	2436	2432	reverse	0	4214
189	3393069	3390435	9632194	9634825	2635	2632	reverse	0	4200
190	5965438	5967952	11354413	11356915	2515	2503	forward	0	4197
191	6516214	6513665	1426508	1429094	2550	2587	reverse	0	4192
192	5029956	5026908	6084978	6088020	3049	3043	reverse	0	4188
193	10278095	10279815	3796402	3798122	1721	1721	forward	0	4178
194	2674217	2675773	11093821	11095389	1557	1569	forward	0	4167
195	3016610	3013280	7886572	7889947	3331	3376	reverse	0	4165
196	4516956	4519794	4885839	4888668	2839	2830	forward	0	4135
197	10471172	10469081	10491931	10494026	2092	2096	reverse	0	4134
198	4796804	4794518	8719876	8722156	2287	2281	reverse	0	4131
199	5630016	5631319	6970798	6972101	1304	1304	forward	0	4111
200	8191134	8190131	12570810	12571820	1004	1011	reverse	0	4108
201	3112043	3113742	340122	341819	1700	1698	forward	0	4105
202	8318660	8317394	5085477	5086741	1267	1265	reverse	0	4084
203	5871083	5869819	9737283	9738550	1265	1268	reverse	0	4078
204	8357380	8355831	5104704	5106253	1550	1550	reverse	0	4064
205	2009551	2012991	11411124	11414706	3441	3583	forward	0	4062
206	2369276	2371468	7129543	7131736	2193	2194	forward	0	4055
207	1645064	1646932	5405035	5406914	1869	1880	forward	0	4033
208	6329357	6327237	2457656	2459755	2121	2100	reverse	0	4023
209	2885237	2882220	1011083	1014100	3018	3018	reverse	0	4019
210	7325317	7327223	5959904	5961813	1907	1910	forward	0	4018
211	5759751	5761211	10331247	10332707	1461	1461	forward	0	3990
212	2314527	2311699	2332304	2335119	2829	2816	reverse	0	3984
213	1003271	1005550	5277765	5280050	2280	2286	forward	0	3975
214	5703515	5700979	7931313	7933841	2537	2529	reverse	0	3972
215	3884181	3881531	7992637	7995286	2651	2650	reverse	0	3962
216	8174493	8173498	12570810	12571820	996	1011	reverse	0	3954
217	4048766	4046149	9028724	9031342	2618	2619	reverse	0	3950
218	8665308	8668432	7474080	7477207	3125	3128	forward	0	3942
219	875680	874277	5839859	5841264	1404	1406	reverse	0	3939
220	8166005	8165004	12570810	12571820	1002	1011	reverse	0	3934
221	9546931	9545729	1756107	1757307	1203	1201	reverse	0	3928
222	10238984	10236874	2195785	2197892	2111	2108	reverse	0	3927
223	580583	581851	7780366	7781638	1269	1273	forward	0	3926
224	9478473	9481580	3053799	3056918	3108	3120	forward	0	3921
225	1065872	1064444	968802	970233	1429	1432	reverse	0	3910
226	1583001	1581251	8267720	8269479	1751	1760	reverse	0	3905
227	9236654	9238479	6986556	6988381	1826	1826	forward	0	3901
228	7642659	7644431	6556479	6558251	1773	1773	forward	0	3885
229	10476561	10477974	3069613	3071020	1414	1408	forward	0	3884
230	5761305	5759747	10345792	10347344	1559	1553	reverse	0	3881
231	3290895	3292244	7766842	7768185	1350	1344	forward	0	3852
232	539751	541342	6731281	6732872	1592	1592	forward	0	3835
233	9545768	9546932	4917830	4918994	1165	1165	forward	0	3824
234	7670062	7668293	3964143	3965901	1770	1759	reverse	0	3815
235	6461486	6463261	6815965	6817743	1776	1779	forward	0	3815
236	2914823	2916686	8192182	8194046	1864	1865	forward	0	3814
237	8413152	8411130	8027622	8029641	2023	2020	reverse	0	3809
238	8943509	8941271	9782689	9784964	2239	2276	reverse	0	3792
239	9331771	9330584	8386629	8387817	1188	1189	reverse	0	3785
240	6704628	6703296	1543083	1544415	1333	1333	reverse	0	3781
241	8042234	8044138	12292188	12294086	1905	1899	forward	0	3772
242	4637721	4636459	7055273	7056537	1263	1265	reverse	0	3765
243	5663183	5664881	7569902	7571601	1699	1700	forward	0	3762
244	7444726	7447153	9933719	9936154	2428	2436	forward	0	3760
245	7328418	7330021	5963435	5965038	1604	1604	forward	0	3759
246	3573688	3571816	4718724	4720591	1873	1868	reverse	0	3758
247	7317700	7319819	5947719	5949852	2120	2134	forward	0	3757
248	7819149	7817011	833485	835629	2139	2145	reverse	0	3756
249	4133351	4131029	9017112	9019440	2323	2329	reverse	0	3755
250	1435809	1433848	4986733	4988696	1962	1964	reverse	0	3753
251	5749384	5750920	10323665	10325214	1537	1550	forward	0	3747
252	4808731	4809859	7055281	7056409	1129	1129	forward	0	3742
253	988080	989575	5257334	5258829	1496	1496	forward	0	3740
254	6297021	6299006	1211516	1213530	1986	2015	forward	0	3729
255	9277617	9275723	9895782	9897676	1895	1895	reverse	0	3728
256	9524074	9522988	7267494	7268580	1087	1087	reverse	0	3725
257	3144852	3142927	8521171	8523092	1926	1922	reverse	0	3723
258	9330140	9329087	8386764	8387817	1054	1054	reverse	0	3714
259	69997	68942	8386764	8387819	1056	1056	reverse	0	3711
260	4387149	4386094	8386764	8387819	1056	1056	reverse	0	3703
261	9963196	9960370	565999	568806	2827	2808	reverse	0	3697
262	10326971	10328725	11654702	11656462	1755	1761	forward	0	3691
263	2197384	2199032	644736	646379	1649	1644	forward	0	3685
264	296322	294680	7904389	7906031	1643	1643	reverse	0	3675
265	5700797	5704026	4885619	4888848	3230	3230	forward	0	3668
266	2921742	2924090	8199007	8201368	2349	2362	forward	0	3657
267	8695115	8693419	7514909	7516607	1697	1699	reverse	0	3645
268	10813173	10815343	10302537	10304707	2171	2171	forward	0	3642
269	7930640	7931968	5810865	5812193	1329	1329	forward	0	3641
270	7336416	7334238	11307683	11309848	2179	2166	reverse	0	3632
271	7805384	7806417	8386764	8387797	1034	1034	forward	0	3631
272	2808657	2807313	6777032	6778379	1345	1348	reverse	0	3620
273	8547339	8548805	4217419	4218885	1467	1467	forward	0	3616
274	3983106	3984547	4547079	4548507	1442	1429	forward	0	3614
275	7989828	7988795	8386764	8387797	1034	1034	reverse	0	3610
276	9312236	9313909	11971642	11973317	1674	1676	forward	0	3604
277	4195532	4194508	8386756	8387780	1025	1025	reverse	0	3600
278	1493815	1495755	3826649	3828589	1941	1941	forward	0	3598
279	5259866	5260945	7267497	7268576	1080	1080	forward	0	3592
280	1395514	1392699	11946740	11949552	2816	2813	reverse	0	3582
281	6658114	6656379	3160227	3161961	1736	1735	reverse	0	3577
282	4144235	4142659	10331204	10332774	1577	1571	reverse	0	3572
283	4702994	4700935	8685900	8687881	2060	1982	reverse	0	3559
284	7207594	7205448	9176778	9178922	2147	2145	reverse	0	3559
285	3424733	3425950	9666011	9667231	1218	1221	forward	0	3559
286	8625716	8624170	3733737	3735283	1547	1547	reverse	0	3557
287	8182983	8182001	12570810	12571820	983	1011	reverse	0	3554
288	445268	448006	6869691	6872466	2739	2776	forward	0	3551
289	1362296	1364006	3160227	3161937	1711	1711	forward	0	3532
290	9331657	9330628	6157838	6158867	1030	1030	reverse	0	3509
291	8086470	8087965	4453553	4455048	1496	1496	forward	0	3506
292	10258864	10257289	5364403	5365979	1576	1577	reverse	0	3503
293	5822870	5820222	8430462	8433118	2649	2657	reverse	0	3501
294	625581	623362	1997268	1999346	2220	2079	reverse	0	3498
295	9330139	9329131	6157859	6158867	1009	1009	reverse	0	3490
296	4142653	4144239	10345804	10347381	1587	1578	forward	0	3490
297	8006713	8004054	2968078	2970749	2660	2672	reverse	0	3486
298	5761235	5759750	10351966	10353448	1486	1483	reverse	0	3471
299	4504121	4502411	4551835	4553548	1711	1714	reverse	0	3469
300	70012	68988	6157843	6158867	1025	1025	reverse	0	3463
301	4387148	4386140	6157859	6158867	1009	1009	reverse	0	3461
302	7805385	7806393	6157859	6158867	1009	1009	forward	0	3461
303	7989827	7988819	6157859	6158867	1009	1009	reverse	0	3455
304	1721309	1723728	3024820	3027242	2420	2423	forward	0	3455
305	4195529	4194515	6157854	6158867	1015	1014	reverse	0	3452
306	3314781	3313637	6623560	6624704	1145	1145	reverse	0	3452
307	8744429	8745651	6028904	6030126	1223	1223	forward	0	3447
308	7517302	7519339	5379271	5381311	2038	2041	forward	0	3445
309	4519142	4516922	7931634	7933842	2221	2209	reverse	0	3434
310	8719003	8720348	3617540	3618888	1346	1349	forward	0	3430
311	5155515	5157318	1263901	1265605	1804	1705	forward	0	3426
312	7922709	7924491	5798497	5800282	1783	1786	forward	0	3426
313	2398546	2396608	9350200	9352141	1939	1942	reverse	0	3416
314	788350	786440	7463873	7465789	1911	1917	reverse	0	3415
315	269697	272135	4885791	4888220	2439	2430	forward	0	3411
316	1603811	1605243	9753130	9754562	1433	1433	forward	0	3407
317	6791342	6789887	9848124	9849581	1456	1458	reverse	0	3404
318	8012134	8013697	10345785	10347345	1564	1561	forward	0	3402
319	241025	238140	4097275	4100125	2886	2851	reverse	0	3385
320	2556489	2558105	9495765	9497378	1617	1614	forward	0	3384
321	7532274	7530382	10246230	10248134	1893	1905	reverse	0	3354
322	1112706	1110681	10424943	10427030	2026	2088	reverse	0	3352
323	1096110	1097153	1756018	1757057	1044	1040	forward	0	3350
324	1750264	1748089	11493101	11495282	2176	2182	reverse	0	3349
325	8106891	8108625	9155108	9156832	1735	1725	forward	0	3343
326	6081110	6082609	575133	576626	1500	1494	forward	0	3342
327	1118420	1120805	10453572	10455951	2386	2380	forward	0	3336
328	604688	606220	6519966	6521515	1533	1550	forward	0	3334
329	2029689	2031152	11438064	11439527	1464	1464	forward	0	3327
330	2286487	2288921	9621653	9624096	2435	2444	forward	0	3324
331	593457	595194	5216721	5218458	1738	1738	forward	0	3315
332	186756	189172	4039300	4041764	2417	2465	forward	0	3313
333	5938541	5941098	11327081	11329644	2558	2564	forward	0	3311
334	7722824	7724271	11511622	11513066	1448	1445	forward	0	3309
335	8362893	8364275	5140431	5141822	1383	1392	forward	0	3308
336	9170561	9171677	9215679	9216801	1117	1123	forward	0	3304
337	6743809	6745465	10669410	10671048	1657	1639	forward	0	3304
338	8361371	8359694	12292405	12294076	1678	1672	reverse	0	3302
339	6789924	6791203	5839886	5841153	1280	1268	forward	0	3294
340	7181774	7180651	9215687	9216812	1124	1126	reverse	0	3292
341	5770752	5768715	10221614	10223580	2038	1967	reverse	0	3290
342	8344634	8343286	5117530	5118878	1349	1349	reverse	0	3281
343	8502189	8501006	9085218	9086401	1184	1184	reverse	0	3270
344	8013692	8012160	10331247	10332776	1533	1530	reverse	0	3268
345	8012164	8013690	5617841	5619373	1527	1533	forward	0	3263
346	2069628	2068265	8970950	8972313	1364	1364	reverse	0	3258
347	4144269	4142659	9006632	9008244	1611	1613	reverse	0	3255
348	9939603	9937687	1521701	1523619	1917	1919	reverse	0	3254
349	457476	455826	4262047	4263700	1651	1654	reverse	0	3254
350	6065898	6064197	585603	587310	1702	1708	reverse	0	3250
351	8952792	8951591	12216615	12217816	1202	1202	reverse	0	3247
352	39105	40919	7702547	7704361	1815	1815	forward	0	3244
353	1195430	1192625	11060480	11063273	2806	2794	reverse	0	3240
354	916415	919141	10727593	10730322	2727	2730	forward	0	3238
355	10400034	10396956	4864115	4867148	3079	3034	reverse	0	3236
356	5868860	5867667	9741662	9742857	1194	1196	reverse	0	3236
357	805879	803741	3669329	3671494	2139	2166	reverse	0	3233
358	5253337	5254390	11710295	11711348	1054	1054	forward	0	3233
359	8456252	8454947	1835505	1836804	1306	1300	reverse	0	3232
360	9355193	9356469	1543065	1544344	1277	1280	forward	0	3224
361	8042376	8044138	5101056	5102818	1763	1763	forward	0	3224
362	9732281	9733335	11710295	11711349	1055	1055	forward	0	3223
363	7205153	7202802	9179217	9181588	2352	2372	reverse	0	3217
364	4142768	4144238	10352023	10353490	1471	1468	forward	0	3214
365	10575225	10573720	12405965	12407469	1506	1505	reverse	0	3213
366	874386	875653	9848268	9849547	1268	1280	forward	0	3208
367	5759753	5761176	10323669	10325098	1424	1430	forward	0	3203
368	4633666	4631383	7059356	7061634	2284	2279	reverse	0	3185
369	5749305	5750812	10331164	10332671	1508	1508	forward	0	3184
370	469109	470466	10589604	10590961	1358	1358	forward	0	3179
371	1097153	1096127	4918043	4919080	1027	1038	reverse	0	3172
372	4542772	4540517	12346116	12348382	2256	2267	reverse	0	3172
373	10017300	10016115	3444263	3445448	1186	1186	reverse	0	3162
374	2651501	2649379	399806	401914	2123	2109	reverse	0	3150
375	2669231	2667352	12176192	12178068	1880	1877	reverse	0	3150
376	7344591	7342874	11299057	11300747	1718	1691	reverse	0	3147
377	3238241	3239533	9388543	9389835	1293	1293	forward	0	3142
378	9502566	9500709	7286063	7288016	1858	1954	reverse	0	3137
379	9171660	9170566	7722270	7723364	1095	1095	reverse	0	3136
380	3095452	3097420	6446985	6448947	1969	1963	forward	0	3134
381	4890265	4891361	12131774	12132870	1097	1097	forward	0	3125
382	4843575	4846854	8779624	8782931	3280	3308	forward	7.72053e-295	3123
383	4464140	4462825	6044753	6046073	1316	1321	reverse	9.6857e-295	3122
384	5361201	5362369	1710687	1711844	1169	1158	forward	1.91242e-294	3119
385	4836430	4837578	8770923	8772073	1149	1151	forward	3.77604e-294	3116
386	4048839	4046449	6207673	6210066	2391	2394	reverse	7.4557e-294	3113
387	2941178	2943614	8221253	8223695	2437	2443	forward	1.47211e-293	3110
388	5750812	5749387	10352023	10353448	1426	1426	reverse	3.64651e-293	3106
389	4054854	4053244	9036367	9037977	1611	1611	reverse	5.73913e-293	3104
390	5041204	5042560	11538392	11539751	1357	1360	forward	5.54227e-292	3094
391	891129	889403	5881105	5882825	1727	1721	reverse	1.09431e-291	3091
392	5750812	5749324	10345916	10347412	1489	1497	reverse	2.16069e-291	3088
393	2762540	2764115	890432	892005	1576	1574	forward	2.71067e-291	3087
394	5377574	5378955	5223217	5224598	1382	1382	forward	2.71067e-291	3087
395	8702766	8701369	222079	223476	1398	1398	reverse	4.26624e-291	3085
396	7608892	7607709	9543416	9544684	1184	1269	reverse	8.4236e-291	3082
397	7352959	7350610	11289320	11291660	2350	2341	reverse	1.05677e-290	3081
398	10148609	10147431	1710687	1711870	1179	1184	reverse	2.08658e-290	3078
399	6727672	6730142	10652300	10654767	2471	2468	forward	2.08658e-290	3078
400	3513565	3514722	1596472	1597633	1158	1162	forward	5.16858e-290	3074
401	1441867	1440302	4981335	4982900	1566	1566	reverse	3.97858e-289	3065
402	2511535	2513792	9450486	9452735	2258	2250	forward	3.97858e-289	3065
403	53152	55833	2968134	2970828	2682	2695	forward	7.85563e-289	3062
404	3181125	3179838	508197	509490	1288	1294	reverse	2.44119e-288	3057
405	1299902	1301715	2069289	2071111	1814	1823	forward	2.44119e-288	3057
406	5761190	5759743	5617930	5619384	1448	1455	reverse	9.51714e-288	3051
407	3352448	3353904	4445889	4447345	1457	1457	forward	9.51714e-288	3051
408	7180682	7181775	7722270	7723363	1094	1094	forward	1.19396e-287	3050
409	10682174	10683792	12176192	12177807	1619	1616	forward	2.35745e-287	3047
410	5759748	5761280	9006711	9008240	1533	1530	forward	7.32595e-287	3042
411	4144189	4142749	10323670	10325116	1441	1447	reverse	1.11346e-285	3030
412	5090030	5091471	1812130	1813573	1442	1444	forward	1.39688e-285	3029
413	606757	608160	6522491	6523894	1404	1404	forward	1.39688e-285	3029
414	8012160	8013692	10351921	10353447	1533	1527	forward	1.39688e-285	3029
415	4985456	4983760	12176192	12177885	1697	1694	reverse	1.75244e-285	3028
416	7107686	7109365	10976379	10978052	1680	1674	forward	3.46015e-285	3025
417	11093613	11092164	7821996	7823445	1450	1450	reverse	1.07527e-284	3020
418	1409356	1411010	12082040	12083712	1655	1673	forward	3.34146e-284	3015
419	5505973	5508812	12032711	12035634	2840	2924	forward	5.25902e-284	3013
420	6853072	6854529	4924242	4925696	1458	1455	forward	1.30269e-283	3009
421	5013749	5012314	2480217	2481647	1436	1431	reverse	1.00276e-282	3000
422	1324838	1323532	6508121	6509424	1307	1304	reverse	3.90934e-282	2994
423	9292815	9291119	6685610	6687309	1697	1700	reverse	1.21486e-281	2989
424	272681	270692	3054316	3056305	1990	1990	reverse	3.00927e-281	2985
425	7031806	7029823	8112649	8114632	1984	1984	reverse	1.17318e-280	2979
426	10851741	10854672	4492139	4495169	2932	3031	forward	1.4718e-280	2978
427	6490345	6488597	5338716	5340474	1749	1759	reverse	2.31643e-280	2976
428	6924854	6923113	1177065	1178806	1742	1742	reverse	5.73793e-280	2972
429	922268	923958	10739749	10741451	1691	1703	forward	1.13294e-279	2969
430	5454690	5453234	7150617	7152076	1457	1460	reverse	3.5207e-279	2964
431	8944024	8946256	8042342	8044536	2233	2195	forward	4.41685e-279	2963
432	6389206	6390454	2592643	2593891	1249	1249	forward	6.71309e-278	2951
433	9186466	9185307	7700663	7701822	1160	1160	reverse	3.28331e-277	2944
434	8441261	8439701	1852703	1854260	1561	1558	reverse	5.16749e-277	2942
435	9988036	9986786	3479518	3480768	1251	1251	reverse	1.28002e-276	2938
436	5749369	5750821	9006694	9008147	1453	1454	forward	2.52737e-276	2935
437	1097130	1098045	1756398	1757316	916	919	forward	2.44068e-275	2925
438	4591846	4590521	7103272	7104594	1326	1323	reverse	1.49756e-274	2917
439	5645771	5646881	7553621	7554731	1111	1111	forward	2.35696e-274	2915
440	10874044	10872805	4783065	4784314	1240	1250	reverse	5.83833e-274	2911
441	9838607	9837242	9944537	9945902	1366	1366	reverse	7.32442e-274	2910
442	2582473	2584127	9514949	9516604	1655	1656	forward	1.8143e-273	2906
443	3347653	3346436	6660851	6662077	1218	1227	reverse	2.85547e-273	2904
444	9478697	9481142	7930591	7933039	2446	2449	forward	3.5823e-273	2903
445	9343780	9341808	8370874	8372865	1973	1992	reverse	7.07318e-273	2900
446	5075085	5072961	1800458	1802582	2125	2125	reverse	1.39658e-272	2897
447	3222089	3223245	2993495	2994653	1157	1159	forward	5.44468e-272	2891
448	5993936	5992591	11682705	11684050	1346	1346	reverse	4.19112e-271	2882
449	1098003	1097143	4917825	4918684	861	860	reverse	2.04983e-270	2875
450	2891246	2889041	999070	1001268	2206	2199	reverse	3.22617e-270	2873
451	8530389	8528716	4235692	4237365	1674	1674	reverse	1.25774e-269	2867
452	8693647	8695114	3964409	3965870	1468	1462	forward	6.1515e-269	2860
453	2499250	2501471	9432166	9434347	2222	2182	forward	1.2146e-268	2857
454	7823048	7821500	829668	831217	1549	1550	reverse	1.91162e-268	2855
455	9902672	9904814	9925965	9928113	2143	2149	forward	2.3982e-268	2854
456	2667383	2669232	2295896	2297742	1850	1847	forward	3.77446e-268	2852
457	7952249	7954126	5834120	5835997	1878	1878	forward	5.9405e-268	2850
458	5915539	5916861	11602196	11603521	1323	1326	forward	1.4715e-267	2846
459	7475712	7477330	6685610	6687231	1619	1622	forward	2.90544e-267	2843
460	1766770	1768516	8840052	8841969	1747	1918	forward	4.57278e-267	2841
461	5750812	5749368	5617945	5619393	1445	1449	reverse	5.73673e-267	2840
462	8225384	8223902	10175885	10177376	1483	1492	reverse	7.19695e-267	2839
463	2593488	2595512	9525474	9527495	2025	2022	forward	9.02886e-267	2838
464	7093589	7095420	10959262	10961087	1832	1826	forward	1.78273e-266	2835
465	4160717	4163711	4655247	4658064	2995	2818	forward	2.80578e-266	2833
466	867543	869011	11902895	11904353	1469	1459	forward	3.51996e-266	2832
467	3486818	3488176	6471827	6473185	1359	1359	forward	1.09385e-265	2827
468	10771550	10772918	2328722	2330090	1369	1369	forward	1.72158e-265	2825
469	2749318	2750692	877165	878550	1375	1386	forward	8.42007e-265	2818
470	5471667	5472838	11995231	11996423	1172	1193	forward	8.42007e-265	2818
471	10319698	10321064	11645409	11646775	1367	1367	forward	6.48147e-264	2809
472	1662853	1661659	270939	272136	1195	1198	reverse	1.27975e-263	2806
473	1248243	1246065	2129321	2131502	2179	2182	reverse	2.52684e-263	2803
474	53569	55864	5472046	5474371	2296	2326	forward	3.97692e-263	2801
475	3432037	3433221	9673841	9675025	1185	1185	forward	3.8405e-262	2791
476	3405693	3404594	9615001	9616100	1100	1100	reverse	7.58299e-262	2788
477	561484	559377	6757214	6759348	2108	2135	reverse	9.51316e-262	2787
478	6595699	6594522	4005851	4007028	1178	1178	reverse	2.35647e-261	2783
479	7275676	7274576	6021775	6022875	1101	1101	reverse	2.35647e-261	2783
480	8112510	8111003	9161235	9162739	1508	1505	reverse	5.83711e-261	2779
481	2146090	2149349	4395978	4399255	3260	3278	forward	7.32289e-261	2778
482	8407932	8406532	1731678	1733072	1401	1395	reverse	2.85488e-260	2772
483	6430316	6431985	2615686	2617345	1670	1660	forward	4.4932e-260	2770
484	7668305	7669765	7514888	7516352	1461	1465	forward	8.87172e-260	2767
485	6840132	6838884	3231604	3232855	1249	1252	reverse	4.33908e-259	2760
486	4736635	4738234	8617344	8618934	1600	1591	forward	4.33908e-259	2760
487	1217444	1218539	9243026	9244121	1096	1096	forward	5.44354e-259	2759
488	4426433	4424848	10331102	10332693	1586	1592	reverse	1.07482e-258	2756
489	9601773	9598871	2837291	2840196	2903	2906	reverse	1.3484e-258	2755
490	7959991	7962135	8091866	8094007	2145	2142	forward	2.1222e-258	2753
491	3256057	3254519	9401707	9403245	1539	1539	reverse	2.66238e-258	2752
492	705865	706947	2395539	2396621	1083	1083	forward	4.19024e-258	2750
493	8903695	8905007	2643858	2645166	1313	1309	forward	4.19024e-258	2750
494	9268624	9269959	319906	321239	1336	1334	forward	1.03795e-257	2746
495	6529427	6530693	3389842	3391108	1267	1267	forward	1.30215e-257	2745
496	3792943	3794056	5326741	5327859	1114	1119	forward	1.30215e-257	2745
497	3744762	3742655	10694607	10696717	2108	2111	reverse	2.04941e-257	2743
498	6951343	6953207	5983402	5985260	1865	1859	forward	2.04941e-257	2743
499	3785715	3783977	5330550	5332285	1739	1736	reverse	7.98974e-257	2737
500	10613831	10615192	8133180	8134544	1362	1365	forward	7.98974e-257	2737
501	3314781	3313870	6623788	6624699	912	912	reverse	3.11485e-256	2731
502	2443774	2442645	9300933	9302062	1130	1130	reverse	3.90771e-256	2730
503	2126203	2128000	11493181	11494988	1798	1808	forward	6.15022e-256	2728
504	4630741	4629184	7062290	7063847	1558	1558	reverse	7.71568e-256	2727
505	4424842	4426327	10345888	10347379	1486	1492	forward	1.21435e-255	2725
506	2457459	2455680	9285865	9287641	1780	1777	reverse	3.77367e-255	2720
507	5793383	5790660	3170166	3172699	2724	2534	reverse	5.93925e-255	2718
508	3399183	3396742	742179	744612	2442	2434	reverse	1.47119e-254	2714
509	1744742	1743011	11498599	11500339	1732	1741	reverse	2.31546e-254	2712
510	2239260	2241325	694939	696995	2066	2057	forward	5.73553e-254	2708
511	8616218	8614678	3749824	3751361	1541	1538	reverse	1.13247e-253	2705
512	3314553	3313642	6623560	6624471	912	912	reverse	1.13247e-253	2705
513	7456917	7456012	3410935	3411842	906	908	reverse	1.42073e-253	2704
514	4178404	4179192	4250655	4251441	789	787	forward	2.80519e-253	2701
515	1053696	1052638	206855	207913	1059	1059	reverse	6.94863e-253	2697
516	8013686	8012268	9006720	9008138	1419	1419	reverse	1.09362e-252	2695
517	6603789	6601426	196090	198390	2364	2301	reverse	4.26356e-252	2689
518	8954518	8953645	12214165	12215042	874	878	reverse	5.3488e-252	2688
519	2129555	2131042	11496525	11498012	1488	1488	forward	1.05611e-251	2685
520	430763	428830	1471056	1473028	1934	1973	reverse	1.60516e-250	2673
521	7456019	7456885	8943879	8944745	867	867	forward	4.98815e-250	2668
522	2114292	2115839	4363016	4364575	1548	1560	forward	1.2356e-249	2664
523	2507608	2508806	9443587	9444785	1199	1199	forward	3.8397e-249	2659
524	4983958	4985458	2296246	2297743	1501	1498	forward	9.51117e-249	2655
525	6833283	6830960	6892554	6894871	2324	2318	reverse	1.49693e-248	2653
526	651426	652813	7612594	7613978	1388	1385	forward	1.15228e-247	2644
527	5429604	5428429	7399166	7400341	1176	1176	reverse	2.27516e-247	2641
528	7795416	7797424	8471482	8473490	2009	2009	forward	3.5808e-247	2639
529	6606898	6605851	11957415	11958462	1048	1048	reverse	5.63571e-247	2637
530	467712	468481	7305803	7306572	770	770	forward	1.11276e-246	2634
531	2027144	2028808	11435287	11436924	1665	1638	forward	1.396e-246	2633
532	4976361	4974862	6695298	6696797	1500	1500	reverse	2.19712e-246	2631
533	2413273	2411920	9333203	9334560	1354	1358	reverse	2.19712e-246	2631
534	9775699	9778586	2887039	2889926	2888	2888	forward	2.19712e-246	2631
535	6653889	6655273	12107578	12108962	1385	1385	forward	2.75637e-246	2630
536	468481	467690	4250656	4251443	792	788	reverse	3.45798e-246	2629
537	2789324	2791344	922900	924947	2021	2048	forward	3.45798e-246	2629
538	10683672	10682172	2296246	2297743	1501	1498	reverse	6.8277e-246	2626
539	1746830	1745410	9180155	9181578	1421	1424	reverse	8.56562e-246	2625
540	415409	413950	4619714	4621173	1460	1460	reverse	1.34812e-245	2623
541	8082755	8081141	8998018	8999628	1615	1611	reverse	4.18936e-245	2618
542	5999032	6000781	11380542	11382318	1750	1777	forward	4.18936e-245	2618
543	4424855	4426290	5617930	5619373	1436	1444	forward	8.27181e-245	2615
544	5239068	5240958	11755048	11756938	1891	1891	forward	1.03773e-244	2614
545	9726885	9727899	2699006	2700017	1015	1012	forward	1.30187e-244	2613
546	4179262	4178405	7305719	7306572	858	854	reverse	2.04898e-244	2611
547	6623471	6624854	5766710	5768093	1384	1384	forward	4.04566e-244	2608
548	7857983	7856522	795124	796577	1462	1454	reverse	5.07544e-244	2607
549	8450220	8448716	1842081	1843582	1505	1502	reverse	5.07544e-244	2607
550	4179191	4178399	6180393	6181182	793	790	reverse	5.07544e-244	2607
551	9290977	9292815	1183360	1185195	1839	1836	forward	1.00213e-243	2604
552	7477551	7475712	1183359	1185195	1840	1837	reverse	1.97869e-243	2601
553	8645287	8646866	3693302	3694881	1580	1580	forward	2.48235e-243	2600
554	2230126	2231636	684702	686203	1511	1502	forward	9.6776e-243	2594
555	4115583	4117861	4800242	4802520	2279	2279	forward	1.52313e-242	2592
556	8349006	8347660	5114526	5115875	1347	1350	reverse	3.77288e-242	2588
557	7581321	7583257	9604080	9606022	1937	1943	forward	3.77288e-242	2588
558	11124164	11123030	7787006	7788146	1135	1141	reverse	4.73322e-242	2587
559	8831200	8829278	6337602	6339446	1923	1845	reverse	5.93801e-242	2586
560	4714774	4713442	8674124	8675456	1333	1333	reverse	7.19394e-241	2575
561	5829241	5830604	8551620	8552986	1364	1367	forward	1.42043e-240	2572
562	3667580	3666681	5415183	5416076	900	894	reverse	1.78198e-240	2571
563	11080197	11081622	6408226	6409651	1426	1426	forward	1.78198e-240	2571
564	8890377	8888898	2639767	2641246	1480	1480	reverse	2.80461e-240	2569
565	7786410	7787784	2217188	2218562	1375	1375	forward	2.80461e-240	2569
566	4588145	4587410	3319248	3319983	736	736	reverse	5.53763e-240	2566
567	7042013	7042983	10892441	10893414	971	974	forward	1.09339e-239	2563
568	2126202	2127976	9176760	9178575	1775	1816	forward	2.15888e-239	2560
569	9444308	9445737	350611	352062	1430	1452	forward	4.26267e-239	2557
570	738292	736720	2538434	2540003	1573	1570	reverse	6.70888e-239	2555
571	6036847	6038281	1116415	1117861	1435	1447	forward	6.70888e-239	2555
572	5318964	5321435	7376306	7378760	2472	2455	forward	8.41655e-239	2554
573	9828616	9826524	9956354	9958470	2093	2117	reverse	1.05589e-238	2553
574	3196762	3198524	3510419	3512175	1763	1757	forward	1.05589e-238	2553
575	4142768	4144189	5617945	5619372	1422	1428	forward	2.08483e-238	2550
576	4136935	4135621	9014131	9015446	1315	1316	reverse	3.28125e-238	2548
577	2454450	2452973	9288862	9290335	1478	1474	reverse	5.16425e-238	2546
578	10593579	10595189	10810086	10811688	1611	1603	forward	2.52579e-237	2539
579	6939796	6941921	5972020	5974141	2126	2122	forward	3.1687e-237	2538
580	4424852	4426293	10352005	10353448	1442	1444	forward	3.97525e-237	2537
581	9858249	9857241	1648207	1649215	1009	1009	reverse	7.84906e-237	2534
582	2138708	2141228	4387807	4390351	2521	2545	forward	7.84906e-237	2534
583	2425778	2423988	9318196	9319980	1791	1785	reverse	1.23534e-236	2532
584	467640	468480	6180331	6181175	841	845	forward	1.94426e-236	2530
585	2321912	2320408	12497405	12498909	1505	1505	reverse	2.43915e-236	2529
586	7374906	7372984	11153835	11155757	1923	1923	reverse	3.06001e-236	2528
587	5209013	5207481	1342973	1344509	1533	1537	reverse	3.70722e-235	2517
588	2950284	2952592	8231732	8233955	2309	2224	forward	3.70722e-235	2517
589	10675483	10674155	4061516	4062831	1329	1316	reverse	4.65085e-235	2516
590	4826764	4828692	8758372	8760309	1929	1938	forward	7.31982e-235	2514
591	8100655	8102169	9146900	9148411	1515	1512	forward	7.31982e-235	2514
592	8489069	8488010	7025577	7026636	1060	1060	reverse	1.81316e-234	2510
593	4826628	4828661	10753650	10755671	2034	2022	forward	1.81316e-234	2510
594	7038254	7039472	10886973	10888187	1219	1215	forward	3.58006e-234	2507
595	7298392	7297102	12188762	12190055	1291	1294	reverse	1.11253e-233	2502
596	8029368	8028122	12278590	12279836	1247	1247	reverse	4.33726e-233	2496
597	7691188	7689904	3940656	3941940	1285	1285	reverse	8.56383e-233	2493
598	3847817	3846432	1388919	1390304	1386	1386	reverse	1.34783e-232	2491
599	10842343	10843846	4486561	4488055	1504	1495	forward	3.33867e-232	2487
600	602873	604201	6517973	6519307	1329	1335	forward	3.33867e-232	2487
601	1337783	1339449	8660429	8662101	1667	1673	forward	6.59212e-232	2484
602	7786470	7787811	3069681	3071017	1342	1337	forward	8.27008e-232	2483
603	4771849	4770567	8748834	8750110	1283	1277	reverse	5.07438e-231	2475
604	1447519	1446467	4974425	4975477	1053	1053	reverse	1.5769e-230	2470
605	7451089	7452500	10331266	10332671	1412	1406	forward	3.90607e-230	2466
606	8559924	8560770	3399193	3400043	847	851	forward	7.71246e-230	2463
607	8612587	8613794	11746844	11748057	1208	1214	forward	1.91042e-229	2459
608	8399590	8398423	771149	772322	1168	1174	reverse	3.00675e-229	2457
609	2464888	2466841	466233	468183	1954	1951	forward	3.00675e-229	2457
610	2072748	2070693	8967678	8969685	2056	2008	reverse	9.34369e-229	2452
611	2714969	2713948	10525238	10526257	1022	1020	reverse	9.34369e-229	2452
612	7452500	7451077	10345916	10347333	1424	1418	reverse	1.1722e-228	2451
613	8922975	8924332	2665827	2667181	1358	1355	forward	3.6427e-228	2446
614	1750145	1748373	4375592	4377361	1773	1770	reverse	5.73313e-228	2444
615	1023518	1024674	3587131	3588287	1157	1157	forward	7.19244e-228	2443
616	1501321	1500354	8358022	8358991	968	970	reverse	2.2351e-227	2438
617	5211302	5209652	1340802	1342425	1651	1624	reverse	2.80402e-227	2437
618	8741255	8740197	4176917	4177970	1059	1054	reverse	2.80402e-227	2437
619	2856853	2855568	938449	939726	1286	1278	reverse	6.94573e-227	2433
620	9333709	9332372	8382005	8383339	1338	1335	reverse	1.09317e-226	2431
621	363190	362259	3382473	3383404	932	932	reverse	2.15843e-226	2428
622	9243302	9244645	6993728	6995068	1344	1341	forward	2.15843e-226	2428
623	8559982	8560772	8824275	8825065	791	791	forward	2.70784e-226	2427
624	9486806	9485238	4878882	4880453	1569	1572	reverse	3.39709e-226	2426
625	8995693	8996589	7435045	7435941	897	897	forward	6.70748e-226	2423
626	8450220	8448666	5440000	5441551	1555	1552	reverse	8.41479e-226	2422
627	7917057	7916332	3319256	3319981	726	726	reverse	1.05567e-225	2421
628	7916335	7917109	186845	187614	775	770	forward	1.32438e-225	2420
629	8238267	8238980	9817464	9818186	714	723	forward	1.32438e-225	2420
630	4648040	4649039	8649788	8650787	1000	1000	forward	2.61495e-225	2417
631	9946550	9945193	1515099	1516465	1358	1367	reverse	1.27895e-224	2410
632	313755	311821	3262628	3264558	1935	1931	reverse	1.27895e-224	2410
633	9257109	9258681	7012555	7014118	1573	1564	forward	2.0129e-224	2408
634	5949251	5951310	11336993	11339060	2060	2068	forward	2.0129e-224	2408
635	2768632	2769406	898191	898965	775	775	forward	2.52526e-224	2407
636	10078316	10076304	1675872	1677902	2013	2031	reverse	3.16803e-224	2406
637	7303615	7305281	5927428	5929139	1667	1712	forward	3.16803e-224	2406
638	2129568	2130982	9180155	9181578	1415	1424	forward	3.97442e-224	2405
639	8659804	8658131	3689318	3691107	1674	1790	reverse	1.94385e-223	2398
640	941313	942630	10759543	10760867	1318	1325	forward	1.94385e-223	2398
641	9293704	9294625	12172550	12173472	922	923	forward	3.05937e-223	2396
642	6705642	6706647	1528012	1529019	1006	1008	forward	6.04065e-223	2393
643	7827203	7825500	824397	826100	1704	1704	reverse	9.50719e-223	2391
644	155631	153625	10408996	10410960	2007	1965	reverse	1.49631e-222	2389
645	6380942	6382296	2586016	2587373	1355	1358	forward	1.49631e-222	2389
646	8560772	8559969	7230154	7230960	804	807	reverse	2.95443e-222	2386
647	9195892	9197120	7739125	7740353	1229	1229	forward	2.95443e-222	2386
648	3451051	3453589	9692557	9695095	2539	2539	forward	7.31829e-222	2382
649	3228232	3226168	10221631	10223634	2065	2004	reverse	9.18108e-222	2381
650	4190625	4189374	6163183	6164550	1252	1368	reverse	1.1518e-221	2380
651	6915873	6915032	7230136	7230978	842	843	reverse	1.1518e-221	2380
652	4172309	4171290	4249065	4250087	1020	1023	reverse	1.81279e-221	2378
653	9489594	9487391	4875783	4878001	2204	2219	reverse	2.85309e-221	2376
654	5157924	5159193	1266381	1267650	1270	1270	forward	2.85309e-221	2376
655	3580700	3578094	4725414	4728053	2607	2640	reverse	4.49038e-221	2374
656	6345636	6344577	2439835	2440936	1060	1102	reverse	8.86616e-221	2371
657	6915065	6915857	8824273	8825065	793	793	forward	8.86616e-221	2371
658	9898723	9899727	9920934	9921881	1005	948	forward	1.11229e-220	2370
659	5159193	5157924	4909494	4910763	1270	1270	reverse	1.39542e-220	2369
660	2385007	2383117	9365332	9367183	1891	1852	reverse	1.39542e-220	2369
661	7657783	7656504	6573655	6574937	1280	1283	reverse	1.7506e-220	2368
662	3162104	3161323	7624694	7625472	782	779	reverse	2.1962e-220	2367
663	4768528	4767657	8752914	8753785	872	872	reverse	2.75522e-220	2366
664	1237101	1236224	2140529	2141418	878	890	reverse	3.45653e-220	2365
665	10700507	10698820	4609625	4611314	1688	1690	reverse	4.33635e-220	2364
666	642126	640781	534630	535990	1346	1361	reverse	6.82485e-220	2362
667	7258844	7261223	9028724	9031106	2380	2383	forward	6.82485e-220	2362
668	2441889	2440612	9302854	9304128	1278	1275	reverse	1.34755e-219	2359
669	6350275	6348712	2433689	2435255	1564	1567	reverse	2.12087e-219	2357
670	5128444	5129674	1230787	1232017	1231	1231	forward	2.12087e-219	2357
671	10665933	10664835	4073040	4074145	1099	1106	reverse	2.66071e-219	2356
672	3440747	3442396	9680538	9682115	1650	1578	forward	2.66071e-219	2356
673	7776830	7778556	2205163	2206910	1727	1748	forward	4.18761e-219	2354
674	8844593	8843315	6321102	6322385	1279	1284	reverse	5.07332e-218	2343
675	10065627	10064904	3410946	3411673	724	728	reverse	7.98473e-218	2341
676	4587405	4588159	186835	187589	755	755	forward	7.98473e-218	2341
677	7486651	7488185	3313819	3315354	1535	1536	forward	2.48131e-217	2336
678	11059800	11060716	6390541	6391454	917	914	forward	3.90526e-217	2334
679	93079	91563	10364970	10366483	1517	1514	reverse	4.8993e-217	2333
680	8723445	8725074	3621509	3623008	1630	1500	forward	4.8993e-217	2333
681	9695787	9693656	2728759	2730890	2132	2132	reverse	6.14636e-217	2332
682	938591	940165	10756392	10758027	1575	1636	forward	1.21359e-216	2329
683	10412415	10410533	7426373	7428258	1883	1886	reverse	1.91002e-216	2327
684	9349145	9347874	8363414	8364685	1272	1272	reverse	1.91002e-216	2327
685	1458349	1456963	4959226	4960615	1387	1390	reverse	2.3962e-216	2326
686	7207262	7205857	4375869	4377274	1406	1406	reverse	3.00612e-216	2325
687	513125	512065	6124241	6125302	1061	1062	reverse	5.93553e-216	2322
688	9392082	9393047	3637102	3638067	966	966	forward	1.17196e-215	2319
689	900348	901157	174981	175793	810	813	forward	2.90301e-215	2315
690	6700268	6698788	1548004	1549487	1481	1484	reverse	3.64194e-215	2314
691	10064905	10065607	8944042	8944745	703	704	forward	3.64194e-215	2314
692	3872180	3870913	8002139	8003401	1268	1263	reverse	4.56895e-215	2313
693	8760693	8758965	6289242	6290982	1729	1741	reverse	1.13176e-214	2309
694	3395447	3394371	9625112	9626188	1077	1077	reverse	1.13176e-214	2309
695	919553	920242	10730832	10731522	690	691	forward	1.41983e-214	2308
696	2326176	2324702	12493056	12494530	1475	1475	reverse	2.80343e-214	2305
697	7949761	7950905	5830494	5831634	1145	1141	forward	3.51702e-214	2304
698	900376	901140	898190	898954	765	765	forward	1.09294e-213	2299
699	758750	757326	2512970	2514399	1425	1430	reverse	1.72014e-213	2297
700	9768983	9770695	2878069	2879775	1713	1707	forward	2.70727e-213	2295
701	4426326	4424869	10323635	10325098	1458	1464	reverse	4.26089e-213	2293
702	5989269	5987462	1143112	1144904	1808	1793	reverse	6.70607e-213	2291
703	6915068	6915855	3399256	3400043	788	788	forward	1.05545e-212	2289
704	4560319	4559400	360051	360970	920	920	reverse	1.66114e-212	2287
705	5921918	5923343	11609257	11610678	1426	1422	forward	1.66114e-212	2287
706	2435888	2434726	9309191	9310356	1163	1166	reverse	2.08396e-212	2286
707	9969011	9969924	3530584	3531502	914	919	forward	2.08396e-212	2286
708	3823804	3821970	5289037	5290943	1835	1907	reverse	4.11473e-212	2283
709	10057511	10055753	3419880	3421627	1759	1748	reverse	8.12445e-212	2280
710	1747288	1745406	4378473	4380346	1883	1874	reverse	8.12445e-212	2280
711	1708538	1709464	3010979	3011905	927	927	forward	3.97359e-211	2273
712	4965914	4964288	6707869	6709558	1627	1690	reverse	7.84577e-211	2270
713	7093997	7095373	11496541	11497920	1377	1380	forward	9.84283e-211	2269
714	11084225	11085645	6422651	6424071	1421	1421	forward	9.5052e-210	2259
715	4906016	4907053	11710302	11711339	1038	1038	forward	9.5052e-210	2259
716	2270393	2272014	726106	727733	1622	1628	forward	1.49599e-209	2257
717	10011450	10010208	3450988	3452236	1243	1249	reverse	5.83223e-209	2251
718	1418152	1416021	5011947	5014094	2132	2148	reverse	5.83223e-209	2251
719	1559107	1557116	8293557	8295509	1992	1953	reverse	5.83223e-209	2251
720	5723671	5725122	1394108	1395547	1452	1440	forward	5.83223e-209	2251
721	4635701	4634121	7057237	7058820	1581	1584	reverse	1.15156e-208	2248
722	6535640	6534217	10331262	10332684	1424	1423	reverse	2.27373e-208	2245
723	7093972	7095412	9180136	9181582	1441	1447	forward	2.85249e-208	2244
724	6763788	6765217	5034777	5036206	1430	1430	forward	4.48944e-208	2242
725	9992716	9991371	3475731	3477076	1346	1346	reverse	5.63218e-208	2241
726	1600247	1601710	8038891	8040360	1464	1470	forward	8.8643e-208	2239
727	5577224	5578319	7503152	7504247	1096	1096	forward	1.39512e-207	2237
728	8614680	8616219	5489475	5491017	1540	1543	forward	1.75024e-207	2236
729	3380684	3379413	4412380	4413645	1272	1266	reverse	2.75464e-207	2234
730	10965751	10964596	5179847	5181002	1156	1156	reverse	2.75464e-207	2234
731	9169635	9168195	7725387	7726830	1441	1444	reverse	4.33545e-207	2232
732	2018696	2017449	11422335	11423600	1248	1266	reverse	5.43899e-207	2231
733	10797905	10799191	10284859	10286148	1287	1290	forward	5.43899e-207	2231
734	786353	787947	5506116	5507704	1595	1589	forward	6.82342e-207	2230
735	10705419	10704026	4601537	4602930	1394	1394	reverse	1.34727e-206	2227
736	1542573	1541085	8313605	8315087	1489	1483	reverse	1.6902e-206	2226
737	5437850	5439884	7345283	7347320	2035	2038	forward	4.18673e-206	2222
738	2893990	2892866	995476	996606	1125	1131	reverse	6.58937e-206	2220
739	1263982	1265169	2087014	2088202	1188	1189	forward	3.2228e-205	2213
740	2669250	2667724	6685594	6687129	1527	1536	reverse	5.07226e-205	2211
741	4494908	4493743	4561370	4562540	1166	1171	reverse	7.98306e-205	2209
742	1046191	1047773	3607831	3609429	1583	1599	forward	1.25643e-204	2207
743	6068229	6066740	582513	584023	1490	1511	reverse	2.48079e-204	2204
744	1746838	1745385	10959650	10961101	1454	1452	reverse	2.48079e-204	2204
745	2768632	2769412	175013	175793	781	781	forward	4.89827e-204	2201
746	4025997	4024772	4741412	4742642	1226	1231	reverse	9.67153e-204	2198
747	5096104	5097380	1818888	1820161	1277	1274	forward	1.52217e-203	2196
748	6895530	6894066	483446	484910	1465	1465	reverse	4.73025e-203	2191
749	2902775	2903884	1009067	1010170	1110	1104	forward	4.73025e-203	2191
750	772534	774307	3675820	3677582	1774	1763	forward	5.93429e-203	2190
751	4096916	4095598	4770336	4771660	1319	1325	reverse	7.44479e-203	2189
752	1612719	1614118	9764608	9766007	1400	1400	forward	9.33978e-203	2188
753	3754882	3753753	156548	157683	1130	1136	reverse	1.46996e-202	2186
754	7350014	7348945	11292631	11293700	1070	1070	reverse	1.46996e-202	2186
755	10556150	10557222	2167541	2168616	1073	1076	forward	2.31352e-202	2184
756	1500377	1501189	4036726	4037544	813	819	forward	2.31352e-202	2184
757	5909645	5910785	11595458	11596573	1141	1116	forward	4.568e-202	2181
758	1461240	1459847	4955905	4957298	1394	1394	reverse	7.18943e-202	2179
759	8616212	8614647	5684375	5685944	1566	1570	reverse	7.18943e-202	2179
760	166493	164947	10102512	10104052	1547	1541	reverse	7.18943e-202	2179
761	1577135	1575901	8274639	8275875	1235	1237	reverse	9.01942e-202	2178
762	4426283	4424870	9006722	9008138	1414	1417	reverse	9.01942e-202	2178
763	4551567	4553152	4149459	4151044	1586	1586	forward	1.13152e-201	2177
764	9263443	9264542	314051	315150	1100	1100	forward	2.23416e-201	2174
765	5398304	5397063	5244261	5245501	1242	1241	reverse	2.80285e-201	2173
766	10662970	10661622	4075904	4077252	1349	1349	reverse	1.09271e-200	2167
767	7204238	7202831	4378928	4380323	1408	1396	reverse	1.09271e-200	2167
768	164947	166530	7630	9205	1584	1576	forward	2.7067e-200	2163
769	5849652	5850607	9769401	9770356	956	956	forward	2.7067e-200	2163
770	3622099	3623163	6943638	6944701	1065	1064	forward	3.39567e-200	2162
771	3996799	3998221	4792618	4794037	1423	1420	forward	5.34433e-200	2160
772	4824555	4825672	8755932	8757046	1118	1115	forward	5.34433e-200	2160
773	5550513	5549524	6930515	6931503	990	989	reverse	1.32382e-199	2156
774	166495	164981	10394555	10396063	1515	1509	reverse	1.32382e-199	2156
775	11154896	11153628	1074833	1076107	1269	1275	reverse	1.66079e-199	2155
776	10086608	10085491	1668161	1669281	1118	1121	reverse	2.61386e-199	2153
777	3804558	3803330	5307376	5308598	1229	1223	reverse	3.27919e-199	2152
778	7175752	7176516	11058877	11059640	765	764	forward	3.27919e-199	2152
779	7300500	7301953	12055884	12057340	1454	1457	forward	3.27919e-199	2152
780	440950	439565	1455110	1456501	1386	1392	reverse	4.11387e-199	2151
781	376102	374777	3359652	3360881	1326	1230	reverse	4.11387e-199	2151
782	8757587	8756521	6292161	6293227	1067	1067	reverse	1.01903e-198	2147
783	6534230	6535636	5617944	5619356	1407	1413	forward	1.27841e-198	2146
784	581808	582471	7781034	7781691	664	658	forward	1.27841e-198	2146
785	7947625	7948777	5828367	5829516	1153	1150	forward	1.60382e-198	2145
786	6745410	6743826	9495795	9497370	1585	1576	reverse	3.97276e-198	2141
787	8614684	8616212	5690533	5692067	1529	1535	forward	3.97276e-198	2141
788	5722346	5720727	1348916	1350559	1620	1644	reverse	1.54881e-197	2135
789	6534197	6535640	10351995	10353432	1444	1438	forward	2.43762e-197	2133
790	525955	524597	6108916	6110271	1359	1356	reverse	3.05809e-197	2132
791	5473979	5475126	11997877	11999024	1148	1148	forward	3.05809e-197	2132
792	819792	820611	8358150	8358978	820	829	forward	3.83649e-197	2131
793	8991042	8989690	8053135	8054478	1353	1344	reverse	1.19222e-196	2126
794	636122	634944	540120	541313	1179	1194	reverse	2.95319e-196	2122
795	8033197	8032296	12272817	12273786	902	970	reverse	2.27326e-195	2113
796	3690475	3692129	7117949	7119601	1655	1653	forward	5.631e-195	2109
797	9996712	9994094	3471845	3474463	2619	2619	reverse	8.86245e-195	2107
798	6957206	6958092	5990680	5991566	887	887	forward	8.86245e-195	2107
799	286318	284091	7914517	7916730	2228	2214	reverse	1.11183e-194	2106
800	9831916	9830856	9952812	9953872	1061	1061	reverse	2.19528e-194	2103
801	8579075	8580310	12446098	12447332	1236	1235	forward	3.45509e-194	2101
802	9590424	9588913	2850040	2851560	1512	1521	reverse	5.43785e-194	2099
803	631068	632014	530679	531628	947	950	forward	6.82199e-194	2098
804	3146727	3145802	8519164	8520090	926	927	reverse	8.55846e-194	2097
805	8447315	8445855	1846196	1847657	1461	1462	reverse	1.68985e-193	2094
806	3772779	3773847	12505087	12506154	1069	1068	forward	1.68985e-193	2094
807	3321925	3323110	6617870	6619055	1186	1186	forward	2.11998e-193	2093
808	8220603	8219682	10184426	10185374	922	949	reverse	3.33657e-193	2091
809	7758850	7757618	8151240	8152472	1233	1233	reverse	4.18586e-193	2090
810	7223772	7224440	7660641	7661312	669	672	forward	4.18586e-193	2090
811	4573756	4572365	4826685	4828014	1392	1330	reverse	1.03686e-192	2086
812	3943538	3945162	3132214	3133838	1625	1625	forward	1.03686e-192	2086
813	6774084	6775150	5046673	5047745	1067	1073	forward	1.03686e-192	2086
814	2328102	2328806	8561895	8562599	705	705	forward	1.30078e-192	2085
815	7204460	7203113	11496307	11497654	1348	1348	reverse	1.63188e-192	2084
816	7771725	7770014	8136927	8138631	1712	1705	reverse	6.36201e-192	2078
817	5799125	5800290	8453673	8454868	1166	1196	forward	7.98139e-192	2077
818	10483540	10484896	3078828	3080180	1357	1353	forward	1.0013e-191	2076
819	11140281	11139136	1090981	1092124	1146	1144	reverse	1.25617e-191	2075
820	5890607	5891733	11572194	11573320	1127	1127	forward	3.1116e-191	2071
821	7286671	7285460	6009680	6010889	1212	1210	reverse	9.66951e-191	2066
822	130719	134441	5347637	5351438	3723	3802	forward	1.21308e-190	2065
823	10683748	10682112	1183630	1185254	1637	1625	reverse	1.90922e-190	2063
824	8840317	8839238	6327109	6328204	1080	1096	reverse	3.00487e-190	2061
825	3951471	3950506	8822565	8823530	966	966	reverse	5.93305e-190	2058
826	3314781	3314098	6624016	6624699	684	684	reverse	9.33783e-190	2056
827	11052463	11051792	2241931	2242606	672	676	reverse	2.31304e-189	2052
828	3314325	3313642	6623560	6624243	684	684	reverse	2.31304e-189	2052
829	8777432	8776055	6257291	6258668	1378	1378	reverse	2.9018e-189	2051
830	5684423	5685521	468718	469816	1099	1099	forward	3.64042e-189	2050
831	7223761	7224457	3744148	3744845	697	698	forward	3.64042e-189	2050
832	6453011	6452099	966464	967376	913	913	reverse	4.56704e-189	2049
833	7204219	7202824	10959674	10961063	1396	1390	reverse	4.56704e-189	2049
834	740462	739241	2536705	2537917	1222	1213	reverse	5.72953e-189	2048
835	4983882	4985474	1183630	1185210	1593	1581	forward	7.18792e-189	2047
836	2129565	2130952	10959655	10961045	1388	1391	forward	9.01753e-189	2046
837	7554798	7554165	849490	850122	634	633	reverse	1.13128e-188	2045
838	5546804	5545838	6935513	6936464	967	952	reverse	1.78049e-188	2043
839	586277	587799	5209553	5211075	1523	1523	forward	2.2337e-188	2042
840	535244	536332	6723130	6724218	1089	1089	forward	2.2337e-188	2042
841	2162281	2160899	4355709	4357091	1383	1383	reverse	2.80226e-188	2041
842	5269862	5268365	1988113	1989619	1498	1507	reverse	3.51554e-188	2040
843	7201780	7200445	9182487	9183823	1336	1337	reverse	5.533e-188	2038
844	763483	762395	2507904	2508990	1089	1087	reverse	6.94137e-188	2037
845	2172810	2171754	4342487	4343543	1057	1057	reverse	6.94137e-188	2037
846	4567968	4566622	4833034	4834383	1347	1350	reverse	8.70822e-188	2036
847	2589215	2590089	9519810	9520684	875	875	forward	8.70822e-188	2036
848	126733	128054	10382009	10383336	1322	1328	forward	8.70822e-188	2036
849	8038087	8039420	12230615	12231951	1334	1337	forward	8.70822e-188	2036
850	10229956	10228953	5389700	5390709	1004	1010	reverse	1.37056e-187	2034
851	2094236	2095509	10577080	10578356	1274	1277	forward	1.37056e-187	2034
852	86593	85395	10379381	10380579	1199	1199	reverse	2.15708e-187	2032
853	10120173	10118888	5915923	5917226	1286	1304	reverse	2.70614e-187	2031
854	5965762	5967794	2551393	2553419	2033	2027	forward	8.40951e-187	2026
855	1661692	1662778	5085656	5086742	1087	1087	forward	1.05501e-186	2025
856	2157061	2158350	11732226	11733518	1290	1293	forward	1.32355e-186	2024
857	2728230	2726060	10503755	10506062	2171	2308	reverse	2.08309e-186	2022
858	2184885	2183522	4331546	4332894	1364	1349	reverse	2.61331e-186	2021
859	6648087	6648911	12100037	12100855	825	819	forward	2.61331e-186	2021
860	9208487	9209837	11271184	11272534	1351	1351	forward	6.47334e-186	2017
861	9970675	9971568	3532431	3533324	894	894	forward	8.12105e-186	2016
862	9808033	9807008	9975210	9976235	1026	1026	reverse	1.01882e-185	2015
863	2944702	2945838	8224652	8225792	1137	1141	forward	1.27815e-185	2014
864	11107603	11105392	7805534	7807769	2212	2236	reverse	2.01163e-185	2012
865	5363535	5362811	7371210	7371937	725	728	reverse	2.52367e-185	2011
866	279799	277800	7923669	7925644	2000	1976	reverse	2.52367e-185	2011
867	11157685	11156032	1070284	1071943	1654	1660	reverse	3.16605e-185	2010
868	3589621	3590744	4804793	4805907	1124	1115	forward	3.16605e-185	2010
869	5463639	5464773	11982685	11983819	1135	1135	forward	3.97193e-185	2009
870	4549276	4548297	4048123	4049101	980	979	reverse	4.81202e-184	1998
871	7294417	7293588	6000805	6001634	830	830	reverse	6.03686e-184	1997
872	7103305	7104406	10970273	10971374	1102	1102	forward	6.03686e-184	1997
873	8951390	8950751	12218788	12219429	640	642	reverse	7.57348e-184	1996
874	3540454	3538565	1580185	1582101	1890	1917	reverse	9.50123e-184	1995
875	1649096	1650371	5409273	5410548	1276	1276	forward	1.19197e-183	1994
876	3307240	3306367	6632968	6633841	874	874	reverse	1.876e-183	1992
877	11097232	11095465	7818085	7819848	1768	1764	reverse	1.876e-183	1992
878	6691766	6690173	1556574	1558209	1594	1636	reverse	2.35351e-183	1991
879	10990877	10989316	5146460	5148003	1562	1544	reverse	2.95257e-183	1990
880	6535636	6534224	9006733	9008145	1413	1413	reverse	5.82979e-183	1987
881	8532505	8531515	4233501	4234497	991	997	reverse	7.3137e-183	1986
882	2599011	2600495	9531123	9532613	1485	1491	forward	7.3137e-183	1986
883	11001007	11000297	4286772	4287487	711	716	reverse	1.15108e-182	1984
884	8482876	8481559	11114455	11115746	1318	1292	reverse	1.15108e-182	1984
885	727612	726009	2551166	2552768	1604	1603	reverse	1.44407e-182	1983
886	9837551	9838610	5892740	5893799	1060	1060	forward	4.48756e-182	1978
887	7833226	7832165	818604	819675	1062	1072	reverse	5.62982e-182	1977
888	3736693	3737636	10675967	10676910	944	944	forward	7.06283e-182	1976
889	7207322	7205867	11493434	11494895	1456	1462	reverse	8.8606e-182	1975
890	8234487	8235992	9813221	9814708	1506	1488	forward	8.8606e-182	1975
891	6582235	6583551	6862038	6863348	1317	1311	forward	1.1116e-181	1974
892	7775692	7775072	12218813	12219433	621	621	reverse	1.39454e-181	1973
893	2774620	2775630	905130	906146	1011	1017	forward	1.74951e-181	1972
894	10968962	10968241	5173969	5174688	722	720	reverse	3.45436e-181	1969
895	1183673	1185192	9055242	9056773	1520	1532	forward	4.33363e-181	1968
896	10064265	10064904	8943876	8944515	640	640	forward	5.43671e-181	1967
897	1081865	1083034	6051461	6052572	1170	1112	forward	6.82057e-181	1966
898	8584256	8585930	12451858	12453613	1675	1756	forward	6.82057e-181	1966
899	9968371	9967387	559316	560300	985	985	reverse	1.34671e-180	1963
900	9271277	9272476	322548	323747	1200	1200	forward	1.34671e-180	1963
901	2971969	2973736	2282480	2284299	1768	1820	forward	1.34671e-180	1963
902	2075417	2074349	8965091	8966159	1069	1069	reverse	2.11954e-180	1961
903	8294502	8295653	5068047	5069192	1152	1146	forward	2.11954e-180	1961
904	1710310	1711435	3012651	3013770	1126	1120	forward	3.33587e-180	1959
905	5279907	5278359	1977515	1979046	1549	1532	reverse	8.26316e-180	1955
906	711535	712645	2402542	2403655	1111	1114	forward	1.03665e-179	1954
907	6363285	6362060	2416789	2418011	1226	1223	reverse	1.30051e-179	1953
908	4930162	4929128	9727340	9728368	1035	1029	reverse	1.30051e-179	1953
909	9363127	9364609	3111829	3113299	1483	1471	forward	1.2559e-178	1943
910	11000364	11000982	849515	850135	619	621	forward	2.47975e-178	1940
911	6943274	6944325	5976613	5977664	1052	1052	forward	3.90281e-178	1938
912	2558105	2556595	10669410	10670917	1511	1508	reverse	6.1425e-178	1936
913	5364466	5363833	7370152	7370785	634	634	reverse	7.70601e-178	1935
914	8940803	8939696	9785456	9786563	1108	1108	reverse	9.66749e-178	1934
915	184503	185344	4036827	4037668	842	842	forward	1.52153e-177	1932
916	3034783	3034026	7866580	7867337	758	758	reverse	1.90882e-177	1931
917	7243170	7244435	6194045	6195315	1266	1271	forward	2.39469e-177	1930
918	163322	162020	10398632	10399934	1303	1303	reverse	3.00424e-177	1929
919	8378111	8379412	4308426	4309760	1302	1335	forward	3.00424e-177	1929
920	5266215	5265069	1991785	1992932	1147	1148	reverse	4.72827e-177	1927
921	10187204	10188595	3049117	3050496	1392	1380	forward	4.72827e-177	1927
922	8680365	8681478	7489621	7490812	1114	1192	forward	4.72827e-177	1927
923	10032131	10031491	7370152	7370792	641	641	reverse	7.44168e-177	1925
924	10064911	10064251	3411191	3411854	661	664	reverse	1.17122e-176	1923
925	3856683	3858181	1373256	1374742	1499	1487	forward	1.17122e-176	1923
926	3568091	3569523	4712212	4713659	1433	1448	forward	1.46934e-176	1922
927	6874318	6875042	475491	476208	725	718	forward	3.63965e-176	1918
928	7636960	7638143	6550391	6551588	1184	1198	forward	3.63965e-176	1918
929	8447315	8445856	1941092	1942552	1460	1461	reverse	5.72834e-176	1916
930	5832073	5833315	5930026	5931268	1243	1243	forward	5.72834e-176	1916
931	5882717	5883335	11556059	11556679	619	621	forward	5.72834e-176	1916
932	5902531	5903560	11583710	11584734	1030	1025	forward	7.18642e-176	1915
933	3658153	3658976	5417961	5418784	824	824	forward	9.01564e-176	1914
934	4144174	4142763	5736703	5738114	1412	1412	reverse	1.13105e-175	1913
935	10219691	10218197	8851418	8852930	1495	1513	reverse	1.13105e-175	1913
936	5019265	5018395	2474717	2475587	871	871	reverse	1.41894e-175	1912
937	3459887	3460469	9702304	9702886	583	583	forward	1.41894e-175	1912
938	10552838	10553752	2164480	2165391	915	912	forward	1.78012e-175	1911
939	4085359	4083997	436251	437684	1363	1434	reverse	2.23323e-175	1910
940	9455539	9457760	4847077	4849300	2222	2224	forward	3.51481e-175	1908
941	2350496	2351771	8581022	8582297	1276	1276	forward	3.51481e-175	1908
942	727390	725348	11354725	11356761	2043	2037	reverse	4.40946e-175	1907
943	2877381	2876398	1019619	1020605	984	987	reverse	5.53185e-175	1906
944	820503	819750	4036827	4037586	754	760	reverse	5.53185e-175	1906
945	1567313	1565821	8284956	8286448	1493	1493	reverse	5.53185e-175	1906
946	2459679	2458424	9283752	9285010	1256	1259	reverse	8.70639e-175	1904
947	11157690	11156034	46318	47980	1657	1663	reverse	1.37027e-174	1902
948	11157690	11156034	5605663	5607325	1657	1663	reverse	1.37027e-174	1902
949	7751763	7750805	8161096	8162054	959	959	reverse	1.71906e-174	1901
950	7498234	7499402	2175006	2176174	1169	1169	forward	2.15663e-174	1900
951	11116228	11115143	7793674	7794752	1086	1079	reverse	2.70557e-174	1899
952	782427	783834	3683736	3685167	1408	1432	forward	2.70557e-174	1899
953	7798868	7799731	9639275	9640135	864	861	forward	4.25821e-174	1897
954	2829807	2830651	6801496	6802330	845	835	forward	5.3421e-174	1896
955	5706585	5708641	8482485	8484562	2057	2078	forward	8.40775e-174	1894
956	398721	397782	4635762	4636698	940	937	reverse	1.05479e-173	1893
957	2979428	2981147	2293136	2294909	1720	1774	forward	1.05479e-173	1893
958	6805516	6806425	9868694	9869606	910	913	forward	1.66009e-173	1891
959	914629	916387	10725807	10727565	1759	1759	forward	2.08265e-173	1890
960	514372	513531	6123020	6123858	842	839	reverse	2.61277e-173	1889
961	9317018	9317640	12203963	12204585	623	623	forward	4.11215e-173	1887
962	3183460	3184000	3655438	3655972	541	535	forward	5.15885e-173	1886
963	6974997	6973925	12198380	12199452	1073	1073	reverse	6.47198e-173	1885
964	10693777	10692244	1412257	1413767	1534	1511	reverse	1.0186e-172	1883
965	7083363	7085081	10947520	10949273	1719	1754	forward	1.0186e-172	1883
966	6776921	6779292	5049406	5051781	2372	2376	forward	1.27788e-172	1882
967	123084	121732	114335	115690	1353	1356	reverse	1.60315e-172	1881
968	3184001	3183493	3496485	3496993	509	509	reverse	1.60315e-172	1881
969	7554159	7554771	4286807	4287419	613	613	forward	1.60315e-172	1881
970	8950754	8951371	2203736	2204353	618	618	forward	2.01121e-172	1880
971	8453212	8452080	1839158	1840293	1133	1136	reverse	2.52315e-172	1879
972	7023643	7022415	10819121	10820343	1229	1223	reverse	2.52315e-172	1879
973	2715626	2716226	9702272	9702875	601	604	forward	2.52315e-172	1879
974	3427267	3428693	9668485	9669941	1427	1457	forward	3.16538e-172	1878
975	3547966	3549033	4690138	4691208	1068	1071	forward	4.9819e-172	1876
976	9498847	9497849	7289704	7290702	999	999	reverse	6.24999e-172	1875
977	9860432	9859675	1647452	1648209	758	758	reverse	9.83665e-172	1873
978	7775084	7775694	2203741	2204351	611	611	forward	9.83665e-172	1873
979	11175302	11174170	1056147	1057285	1133	1139	reverse	1.23405e-171	1872
980	10695716	10696731	1452015	1453030	1016	1016	forward	1.54816e-171	1871
981	8466904	8465640	1827941	1829205	1265	1265	reverse	2.4366e-171	1869
982	2795819	2796803	930676	931655	985	980	forward	2.4366e-171	1869
983	8909236	8910813	2648433	2650015	1578	1583	forward	2.4366e-171	1869
984	3043640	3042597	7857006	7858052	1044	1047	reverse	3.05681e-171	1868
985	5098888	5099711	1821939	1822762	824	824	forward	3.83488e-171	1867
986	816213	816729	3496479	3496995	517	517	forward	3.83488e-171	1867
987	6978149	6979379	12196226	12197455	1231	1230	forward	3.83488e-171	1867
988	3160055	3158804	7627767	7629021	1252	1255	reverse	6.0356e-171	1865
989	953168	955380	10772092	10774304	2213	2213	forward	6.0356e-171	1865
990	426282	425574	1475207	1475915	709	709	reverse	7.5719e-171	1864
991	816725	816219	3655467	3655973	507	507	reverse	9.49924e-171	1863
992	2965624	2966582	2274019	2274977	959	959	forward	9.49924e-171	1863
993	6499730	6498084	370055	371704	1647	1650	reverse	1.19172e-170	1862
994	1188909	1190321	9060318	9061727	1413	1410	forward	1.19172e-170	1862
995	8698727	8697611	7511054	7512102	1117	1049	reverse	1.49506e-170	1861
996	1476716	1477865	3815853	3816996	1150	1144	forward	1.87561e-170	1860
997	4653274	4654375	8655091	8656192	1102	1102	forward	2.35302e-170	1859
998	5512947	5514607	12042617	12044299	1661	1683	forward	2.35302e-170	1859
999	2641170	2639953	412080	413305	1218	1226	reverse	2.95196e-170	1858
1000	7338524	7336472	11305469	11307628	2053	2160	reverse	2.95196e-170	1858
1001	6410800	6410063	2575112	2575849	738	738	reverse	3.70334e-170	1857
1002	2339807	2341351	8572163	8573699	1545	1537	forward	4.64599e-170	1856
1003	3364112	3363107	8983253	8984256	1006	1004	reverse	7.31217e-170	1854
1004	1135630	1136418	10468112	10468891	789	780	forward	7.31217e-170	1854
1005	9624914	9624130	2811565	2812348	785	784	reverse	9.1734e-170	1853
1006	1724713	1725829	3028558	3029673	1117	1116	forward	1.15084e-169	1852
1007	11041422	11040746	2255924	2256601	677	678	reverse	1.44377e-169	1851
1008	9719847	9721007	4912320	4913477	1161	1158	forward	1.81127e-169	1850
1009	10006426	10004900	3457406	3458927	1527	1522	reverse	2.8507e-169	1848
1010	5970003	5971469	11359901	11361370	1467	1470	forward	4.48662e-169	1846
1011	935770	937407	8758673	8760310	1638	1638	forward	7.06135e-169	1844
1012	873698	872799	5841881	5842783	900	903	reverse	8.85874e-169	1843
1013	3250045	3249032	9406308	9407312	1014	1005	reverse	8.85874e-169	1843
1014	2718221	2717143	10513921	10514992	1079	1072	reverse	8.85874e-169	1843
1015	2716205	2715626	10519703	10520285	580	583	reverse	8.85874e-169	1843
1016	7093999	7095409	4378939	4380343	1411	1405	forward	1.11136e-168	1842
1017	1214146	1215189	9239705	9240754	1044	1050	forward	1.11136e-168	1842
1018	5661222	5662105	7568120	7569003	884	884	forward	1.39425e-168	1841
1019	1697085	1695403	233371	235056	1683	1686	reverse	1.74914e-168	1840
1020	5932858	5934020	11630518	11631674	1163	1157	forward	1.74914e-168	1840
1021	10154439	10155583	1720275	1721413	1145	1139	forward	2.19436e-168	1839
1022	5625397	5626403	6965550	6966551	1007	1002	forward	2.19436e-168	1839
1023	7314043	7313270	5944904	5945680	774	777	reverse	3.45364e-168	1837
1024	1281328	1282557	2108620	2109867	1230	1248	forward	4.33273e-168	1836
1025	141479	142292	5359547	5360360	814	814	forward	4.33273e-168	1836
1026	4979158	4977218	6692471	6694408	1941	1938	reverse	5.43557e-168	1835
1027	3152152	3151490	7638826	7639500	663	675	reverse	5.43557e-168	1835
1028	5444747	5445592	7352204	7353052	846	849	forward	5.43557e-168	1835
1029	226275	224805	4114831	4116298	1471	1468	reverse	8.55488e-168	1833
1030	10714602	10713231	4592163	4593528	1372	1366	reverse	8.55488e-168	1833
1031	4814095	4813167	8702037	8702964	929	928	reverse	1.07324e-167	1832
1032	2171767	2172812	9615019	9616058	1046	1040	forward	1.34642e-167	1831
1033	461107	460137	4258166	4259139	971	974	reverse	1.68914e-167	1830
1034	3460437	3459879	10519703	10520258	559	556	reverse	1.68914e-167	1830
1035	10568869	10570069	12529102	12530302	1201	1201	forward	4.18411e-167	1826
1036	10540034	10541094	2152257	2153383	1061	1127	forward	5.24913e-167	1825
1037	5759754	5761175	5736688	5738109	1422	1422	forward	6.58523e-167	1824
1038	9287109	9285457	9885317	9886990	1653	1674	reverse	8.26143e-167	1823
1039	9717976	9716726	2686440	2687690	1251	1251	reverse	1.03643e-166	1822
1040	3770353	3771257	10629373	10630277	905	905	forward	1.30024e-166	1821
1041	5617255	5618227	6955517	6956490	973	974	forward	1.6312e-166	1820
1042	9413853	9416478	8392526	8395129	2626	2604	forward	1.6312e-166	1820
1043	2797980	2798861	933073	933954	882	882	forward	2.04641e-166	1819
1044	4393400	4394878	10037273	10038757	1479	1485	forward	3.22077e-166	1817
1045	2613448	2612456	6646423	6647427	993	1005	reverse	5.06907e-166	1815
1046	10125070	10123771	1698398	1699700	1300	1303	reverse	6.35935e-166	1814
1047	2909284	2910174	8185194	8186082	891	889	forward	6.35935e-166	1814
1048	11173415	11172250	1058615	1059793	1166	1179	reverse	7.97805e-166	1813
1049	7721029	7722095	11507799	11508874	1067	1076	forward	1.00088e-165	1812
1050	2759920	2760882	887897	888853	963	957	forward	1.25564e-165	1811
1051	1050016	1051483	3613418	3614885	1468	1468	forward	1.97621e-165	1809
1052	7088421	7089753	10953196	10954522	1333	1327	forward	1.97621e-165	1809
1053	6340005	6339162	2444061	2444922	844	862	reverse	2.47924e-165	1808
1054	8987527	8985743	8056491	8058278	1785	1788	reverse	4.8952e-165	1805
1055	2114241	2115771	10023452	10025021	1531	1570	forward	4.8952e-165	1805
1056	7154667	7155952	11032468	11033635	1286	1168	forward	4.8952e-165	1805
1057	2743258	2742678	2283633	2284213	581	581	reverse	6.14122e-165	1804
1058	3292547	3293169	7768769	7769386	623	618	forward	6.14122e-165	1804
1059	4144238	4142762	82884	84363	1477	1480	reverse	7.7044e-165	1803
1060	10807255	10808189	10296032	10296960	935	929	forward	9.66546e-165	1802
1061	10508291	10509263	8100790	8101762	973	973	forward	1.21257e-164	1801
1062	4921128	4919406	3034964	3036683	1723	1720	reverse	1.52122e-164	1800
1063	5241635	5242962	11757759	11759091	1328	1333	forward	1.90843e-164	1799
1064	1640887	1641797	3868497	3869434	911	938	forward	3.00361e-164	1797
1065	10013926	10012847	3448515	3449590	1080	1076	reverse	7.44012e-164	1793
1066	3953672	3952284	8818471	8819859	1389	1389	reverse	7.44012e-164	1793
1067	123085	121732	6367044	6368406	1354	1363	reverse	9.33393e-164	1792
1068	9542057	9541312	7242283	7243023	746	741	reverse	1.17098e-163	1791
1069	1026247	1027529	5449834	5451110	1283	1277	forward	1.46904e-163	1790
1070	2089145	2090606	10571906	10573361	1462	1456	forward	1.84296e-163	1789
1071	3095837	3097042	11609550	11610755	1206	1206	forward	1.84296e-163	1789
1072	368359	367320	3371416	3372456	1040	1041	reverse	2.31207e-163	1788
1073	8470625	8469416	11128218	11129439	1210	1222	reverse	2.31207e-163	1788
1074	4501987	4501068	4554115	4555034	920	920	reverse	2.90058e-163	1787
1075	3046568	3045581	7853881	7854867	988	987	reverse	2.90058e-163	1787
1076	5201183	5202188	3041294	3042298	1006	1005	forward	2.90058e-163	1787
1077	4100998	4100217	4766033	4766814	782	782	reverse	3.63889e-163	1786
1078	185223	184569	8358150	8358813	655	664	reverse	3.63889e-163	1786
1079	10663589	10662612	4075282	4076262	978	981	reverse	4.56513e-163	1785
1080	11032016	11032965	8258347	8259296	950	950	forward	5.72714e-163	1784
1081	5364466	5363837	3429717	3430346	630	630	reverse	7.18492e-163	1783
1082	3465855	3464767	1591960	1593054	1089	1095	reverse	9.01376e-163	1782
1083	9679023	9678029	2749979	2750971	995	993	reverse	9.01376e-163	1782
1084	6857648	6858720	4929951	4931017	1073	1067	forward	9.01376e-163	1782
1085	5442150	5444044	7349487	7351384	1895	1898	forward	9.01376e-163	1782
1086	10032133	10031501	3429715	3430347	633	633	reverse	1.13081e-162	1781
1087	3834826	3833556	3561257	3562533	1271	1277	reverse	1.41865e-162	1780
1088	4546331	4545690	12342550	12343194	642	645	reverse	1.77975e-162	1779
1089	361590	360813	3384711	3385483	778	773	reverse	6.93846e-162	1773
1090	2904304	2905622	1006394	1007703	1319	1310	forward	6.93846e-162	1773
1091	7187478	7188221	9196008	9196751	744	744	forward	6.93846e-162	1773
1092	7420961	7422238	8918017	8919285	1278	1269	forward	8.70457e-162	1772
1093	10984293	10983331	5153986	5154948	963	963	reverse	1.09202e-161	1771
1094	2691244	2692171	11109620	11110545	928	926	forward	1.09202e-161	1771
1095	10970473	10969437	5170876	5171913	1037	1038	reverse	1.7187e-161	1769
1096	4155463	4156316	4649253	4650106	854	854	forward	3.39354e-161	1766
1097	5922082	5923512	6447234	6448661	1431	1428	forward	5.34098e-161	1764
1098	10158323	10159259	1723547	1724483	937	937	forward	8.40599e-161	1762
1099	10449015	10450273	10543483	10544735	1259	1253	forward	1.05456e-160	1761
1100	619075	620529	1346457	1347947	1455	1491	forward	1.65975e-160	1759
1101	1019402	1020114	3583289	3584010	713	722	forward	1.65975e-160	1759
1102	6570115	6568864	4315677	4316940	1252	1264	reverse	2.08222e-160	1758
1103	8017831	8016535	10065269	10066559	1297	1291	reverse	2.61222e-160	1757
1104	6065541	6064196	3160596	3161941	1346	1346	reverse	3.27713e-160	1756
1105	7130115	7128777	10991275	10992606	1339	1332	reverse	5.15778e-160	1754
1106	3523739	3524804	1609804	1610869	1066	1066	forward	5.15778e-160	1754
1107	929673	930390	10748081	10748798	718	718	forward	6.47063e-160	1753
1108	2722367	2721405	10509683	10510638	963	956	reverse	8.11766e-160	1752
1109	5175333	5176168	1285544	1286371	836	828	forward	8.11766e-160	1752
1110	4761452	4762293	8641659	8642488	842	830	forward	8.11766e-160	1752
1111	4768487	4767782	10748081	10748786	706	706	reverse	1.01839e-159	1751
1112	10993478	10992506	5144360	5145341	973	982	reverse	1.27761e-159	1750
1113	7033495	7034395	10878149	10879058	901	910	forward	1.60281e-159	1749
1114	10566348	10567257	12525283	12526282	910	1000	forward	2.01079e-159	1748
1115	4406822	4405645	10067620	10068794	1178	1175	reverse	2.52262e-159	1747
1116	6627817	6628996	5771077	5772235	1180	1159	forward	2.52262e-159	1747
1117	3267182	3266118	9423569	9424634	1065	1066	reverse	4.98086e-159	1744
1118	112962	111712	12431718	12432977	1251	1260	reverse	4.98086e-159	1744
1119	8535270	8536431	1483005	1484196	1162	1192	forward	6.24868e-159	1743
1120	10617319	10618110	10260841	10261632	792	792	forward	7.83921e-159	1742
1121	5588730	5589522	11147246	11148038	793	793	forward	7.83921e-159	1742
1122	7251295	7250723	4097424	4097995	573	572	reverse	9.8346e-159	1741
1123	970075	971372	10631083	10632410	1298	1328	forward	1.23379e-158	1740
1124	240311	240865	6202534	6203088	555	555	forward	1.94182e-158	1738
1125	3034760	3034026	2608225	2608959	735	735	reverse	3.05617e-158	1736
1126	1540464	1539665	8316286	8317085	800	800	reverse	3.05617e-158	1736
1127	4408963	4407810	10065467	10066605	1154	1139	reverse	6.03434e-158	1733
1128	3851102	3849922	1385517	1386697	1181	1181	reverse	7.57031e-158	1732
1129	7461512	7462622	5752272	5753382	1111	1111	forward	9.49725e-158	1731
1130	8523948	8524735	11071616	11072409	788	794	forward	9.49725e-158	1731
1131	338162	337522	3237885	3238525	641	641	reverse	2.35253e-157	1727
1132	3415590	3416419	9651232	9652064	830	833	forward	2.35253e-157	1727
1133	9292812	9291239	1726165	1727720	1574	1556	reverse	3.70257e-157	1725
1134	7202764	7204242	7059316	7060798	1479	1483	forward	3.70257e-157	1725
1135	2532826	2534023	9472865	9474059	1198	1195	forward	3.70257e-157	1725
1136	3623170	3622049	9108245	9109271	1122	1027	reverse	7.31064e-157	1722
1137	658197	659392	7620080	7621281	1196	1202	forward	7.31064e-157	1722
1138	1117875	1116649	10419287	10420522	1227	1236	reverse	9.17149e-157	1721
1139	7120218	7121470	10989752	10991010	1253	1259	forward	9.17149e-157	1721
1140	7004337	7003010	10848070	10849406	1328	1337	reverse	1.1506e-156	1720
1141	1027680	1026245	10048594	10050023	1436	1430	reverse	1.44347e-156	1719
1142	5886046	5886957	11561951	11562862	912	912	forward	1.44347e-156	1719
1143	3546437	3545287	1570098	1571244	1151	1147	reverse	1.81089e-156	1718
1144	8966806	8965803	8804482	8805489	1004	1008	reverse	1.81089e-156	1718
1145	4178010	4176939	4242027	4243095	1072	1069	reverse	2.27183e-156	1717
1146	2076748	2075865	8961146	8962029	884	884	reverse	2.27183e-156	1717
1147	2235515	2236484	689952	690919	970	968	forward	4.48569e-156	1714
1148	8882756	8880969	1912156	1913946	1788	1791	reverse	5.62747e-156	1713
1149	4415203	4414114	10061718	10062801	1090	1084	reverse	5.62747e-156	1713
1150	7869728	7871325	4271500	4273097	1598	1598	forward	5.62747e-156	1713
1151	2743690	2744963	10243617	10244887	1274	1271	forward	5.62747e-156	1713
1152	5641496	5642580	6979579	6980677	1085	1099	forward	7.05988e-156	1712
1153	4850020	4850953	8785999	8786923	934	925	forward	7.05988e-156	1712
1154	5796486	5795541	3166564	3167544	946	981	reverse	1.11113e-155	1710
1155	8013127	8012299	10324238	10325066	829	829	reverse	1.39396e-155	1709
1156	732356	731162	2545552	2546740	1195	1189	reverse	3.45292e-155	1705
1157	2366063	2367320	8597467	8598718	1258	1252	forward	5.43444e-155	1703
1158	7250736	7251292	6202532	6203088	557	557	forward	6.81771e-155	1702
1159	1088130	1089294	6058382	6059536	1165	1155	forward	8.55309e-155	1701
1160	1592373	1594036	8032325	8033983	1664	1659	forward	8.55309e-155	1701
1161	3151488	3152047	475491	476053	560	563	forward	1.07302e-154	1700
1162	4724439	4725796	8605581	8606932	1358	1352	forward	2.65793e-154	1696
1163	6874877	6874320	7638940	7639503	558	564	reverse	3.33448e-154	1695
1164	1413414	1412398	5016052	5017071	1017	1020	reverse	5.24803e-154	1693
1165	5137196	5138327	1244339	1245470	1132	1132	forward	5.24803e-154	1693
1166	11181132	11180407	1049362	1050087	726	726	reverse	6.58386e-154	1692
1167	7707975	7706826	3918448	3919608	1150	1161	reverse	6.58386e-154	1692
1168	8422917	8424092	1857025	1858200	1176	1176	forward	8.2597e-154	1691
1169	2973647	2973072	10208713	10209288	576	576	reverse	1.03621e-153	1690
1170	522493	521062	6112697	6114155	1432	1459	reverse	1.29997e-153	1689
1171	10513584	10514530	7888996	7889942	947	947	forward	1.29997e-153	1689
1172	1429189	1427919	4991964	4993183	1271	1220	reverse	2.04598e-153	1687
1173	6308614	6309543	1226046	1226972	930	927	forward	6.35802e-153	1682
1174	2742667	2743257	10208703	10209292	591	590	forward	6.35802e-153	1682
1175	11008123	11007397	2230332	2231058	727	727	reverse	7.97638e-153	1681
1176	2323285	2322526	12496035	12496794	760	760	reverse	7.97638e-153	1681
1177	8374323	8375241	4304687	4305604	919	918	forward	1.25538e-152	1679
1178	6016163	6017157	11397163	11398158	995	996	forward	2.47872e-152	1676
1179	6507443	6508359	374689	375605	917	917	forward	3.10965e-152	1675
1180	2207496	2208603	656787	657900	1108	1114	forward	3.10965e-152	1675
1181	2925439	2926506	8202688	8203749	1068	1062	forward	4.89417e-152	1673
1182	8013690	8012762	10323669	10324603	929	935	reverse	6.13993e-152	1672
1183	7128057	7126702	10993809	10995161	1356	1353	reverse	9.66344e-152	1670
1184	3293170	3292636	3346330	3346864	535	535	reverse	1.21232e-151	1669
1185	1639341	1640625	3866865	3868146	1285	1282	forward	1.21232e-151	1669
1186	2360781	2361889	8592553	8593658	1109	1106	forward	1.21232e-151	1669
1187	5176567	5177940	1286956	1288299	1374	1344	forward	1.5209e-151	1668
1188	869583	870343	11905027	11905790	761	764	forward	1.5209e-151	1668
1189	1322087	1321020	6510494	6511564	1068	1071	reverse	1.90803e-151	1667
1190	6353834	6352754	2429374	2430457	1081	1084	reverse	4.7263e-151	1663
1191	8799411	8800196	6310763	6311548	786	786	forward	7.43857e-151	1661
1192	5856630	5857629	9777733	9778732	1000	1000	forward	7.43857e-151	1661
1193	4069255	4070755	10192398	10193894	1501	1497	forward	7.43857e-151	1661
1194	4375509	4374062	12055890	12057340	1448	1451	reverse	9.33197e-151	1660
1195	10859125	10860077	4499321	4500273	953	953	forward	9.33197e-151	1660
1196	6760140	6761225	5031782	5032868	1086	1087	forward	1.17073e-150	1659
1197	10081912	10080737	1672410	1673643	1176	1234	reverse	1.84258e-150	1657
1198	1437593	1438692	2500725	2501812	1100	1088	forward	2.31159e-150	1656
1199	1698825	1697840	231671	232651	986	981	reverse	2.89998e-150	1655
1200	388208	387664	3346323	3346872	545	550	reverse	3.63813e-150	1654
1201	8707404	8706252	218686	219835	1153	1150	reverse	4.56418e-150	1653
1202	1063928	1063341	1285682	1286270	588	589	reverse	4.56418e-150	1653
1203	3938896	3939393	3400528	3401023	498	496	forward	4.56418e-150	1653
1204	4632241	4633570	9180165	9181494	1330	1330	forward	4.56418e-150	1653
1205	7356145	7355030	11285662	11286764	1116	1103	reverse	5.72594e-150	1652
1206	8246614	8247633	9829452	9830474	1020	1023	forward	9.01187e-150	1650
1207	8774932	8773898	6259682	6260752	1035	1071	reverse	1.13057e-149	1649
1208	387669	388199	7768852	7769382	531	531	forward	1.13057e-149	1649
1209	11157690	11156014	11860578	11862255	1677	1678	reverse	1.41835e-149	1648
1210	8317394	8318488	271020	272114	1095	1095	forward	1.41835e-149	1648
1211	4043992	4042505	4664795	4666288	1488	1494	reverse	1.77938e-149	1647
1212	1615000	1615998	9766858	9767856	999	999	forward	2.2323e-149	1646
1213	2668897	2667777	1726493	1727613	1121	1121	reverse	3.51334e-149	1644
1214	7611267	7609823	6609624	6611071	1445	1448	reverse	4.40762e-149	1643
1215	11183683	11184817	5637473	5638607	1135	1135	forward	4.40762e-149	1643
1216	620505	618653	2005138	2006993	1853	1856	reverse	5.52953e-149	1642
1217	5816216	5814661	8437075	8438624	1556	1550	reverse	1.09179e-148	1639
1218	1240532	1239117	2136510	2137922	1416	1413	reverse	1.3697e-148	1638
1219	170569	169134	11411193	11412637	1436	1445	reverse	1.3697e-148	1638
1220	2755871	2756700	884722	885542	830	821	forward	1.3697e-148	1638
1221	9190037	9191299	7731785	7733038	1263	1254	forward	1.3697e-148	1638
1222	6774131	6775101	2402540	2403512	971	973	forward	1.71834e-148	1637
1223	5636370	5637514	6977449	6978590	1145	1142	forward	1.71834e-148	1637
1224	3987990	3989601	12384597	12386208	1612	1612	forward	1.71834e-148	1637
1225	10383236	10382579	7312559	7313221	658	663	reverse	2.15572e-148	1636
1226	4782251	4780871	8737600	8738984	1381	1385	reverse	2.15572e-148	1636
1227	10561013	10562359	2172534	2173759	1347	1226	forward	2.15572e-148	1636
1228	928333	928847	10810047	10810559	515	513	forward	3.39283e-148	1634
1229	5335086	5333772	2045477	2046794	1315	1318	reverse	4.25643e-148	1633
1230	395739	395261	3337734	3338211	479	478	reverse	4.25643e-148	1633
1231	10813239	10814779	2098327	2099882	1541	1556	forward	4.25643e-148	1633
1232	4691575	4692846	7044942	7046236	1272	1295	forward	4.25643e-148	1633
1233	8008140	8009274	156547	157687	1135	1141	forward	6.69906e-148	1631
1234	1365236	1366871	8284863	8286495	1636	1633	forward	6.69906e-148	1631
1235	928360	928850	10746149	10746639	491	491	forward	6.69906e-148	1631
1236	7976274	7977018	8459761	8460505	745	745	forward	8.40424e-148	1630
1237	1063966	1063349	8940945	8941566	618	622	reverse	1.05434e-147	1629
1238	8422810	8423972	1857026	1858188	1163	1163	forward	1.32272e-147	1628
1239	1665989	1664774	267659	268877	1216	1219	reverse	1.6594e-147	1627
1240	6001909	6002919	11383934	11384944	1011	1011	forward	1.6594e-147	1627
1241	1388895	1387788	11953806	11954918	1108	1113	reverse	2.08178e-147	1626
1242	6931417	6929955	1170499	1171955	1463	1457	reverse	2.61167e-147	1625
1243	4989768	4991010	4430368	4431603	1243	1236	forward	2.61167e-147	1625
1244	10795633	10797813	10282305	10284478	2181	2174	forward	2.61167e-147	1625
1245	3873587	3872747	8000551	8001391	841	841	reverse	3.27645e-147	1624
1246	204622	203767	4134635	4135497	856	863	reverse	4.11043e-147	1623
1247	4632249	4633546	11496553	11497847	1298	1295	forward	4.11043e-147	1623
1248	3897013	3897982	7968791	7969761	970	971	forward	5.1567e-147	1622
1249	5175491	5176054	8941003	8941566	564	564	forward	8.11596e-147	1620
1250	8415245	8414333	8025843	8026754	913	912	reverse	1.01818e-146	1619
1251	1647272	1648058	5407263	5408055	787	793	forward	1.01818e-146	1619
1252	5767257	5765866	10224985	10226379	1392	1395	reverse	1.27734e-146	1618
1253	2865940	2865010	1032624	1033560	931	937	reverse	1.60248e-146	1617
1254	5854634	5855943	9775749	9777037	1310	1289	forward	2.01037e-146	1616
1255	3302506	3301372	5637473	5638607	1135	1135	reverse	2.52209e-146	1615
1256	4798663	4797648	8717686	8718701	1016	1016	reverse	3.96944e-146	1613
1257	1175049	1175840	9045703	9046497	792	795	forward	3.96944e-146	1613
1258	7452500	7451149	5617945	5619296	1352	1352	reverse	4.97981e-146	1612
1259	1272257	1273787	2098376	2099911	1531	1536	forward	4.97981e-146	1612
1260	9665181	9663311	2767064	2768931	1871	1868	reverse	1.23353e-145	1608
1261	5203989	5205471	2005123	2006572	1483	1450	forward	1.54751e-145	1607
1262	2620869	2619620	6638671	6639911	1250	1241	reverse	1.94141e-145	1606
1263	10584967	10585940	10800043	10801019	974	977	forward	1.94141e-145	1606
1264	8633412	8632513	3724811	3725710	900	900	reverse	3.05553e-145	1604
1265	6751464	6750478	12084813	12085799	987	987	reverse	3.05553e-145	1604
1266	5881263	5882221	11554520	11555480	959	961	forward	3.05553e-145	1604
1267	6823655	6822553	9880470	9881575	1103	1106	reverse	3.83328e-145	1603
1268	6971767	6970884	11976280	11977163	884	884	reverse	4.809e-145	1602
1269	1046210	1047433	2512987	2514207	1224	1221	forward	6.03308e-145	1601
1270	10951418	10952523	10037388	10038493	1106	1106	forward	6.03308e-145	1601
1271	9285022	9283835	9887540	9888764	1188	1225	reverse	7.56873e-145	1600
1272	7867816	7868998	4269392	4270572	1183	1181	forward	1.19122e-144	1598
1273	9632592	9631696	2800963	2801859	897	897	reverse	1.87482e-144	1596
1274	7606812	7605835	9545833	9546810	978	978	reverse	1.87482e-144	1596
1275	2132187	2133383	4381493	4382692	1197	1200	forward	2.35204e-144	1595
1276	10650213	10649428	4090596	4091380	786	785	reverse	2.95072e-144	1594
1277	9174369	9173603	7719333	7720099	767	767	reverse	2.95072e-144	1594
1278	9308720	9309700	11968122	11969102	981	981	forward	2.95072e-144	1594
1279	9226865	9225727	7743684	7744810	1139	1127	reverse	3.70179e-144	1593
1280	7300506	7301958	5445488	5446943	1453	1456	forward	3.70179e-144	1593
1281	10593579	10594070	10746163	10746652	492	490	forward	3.70179e-144	1593
1282	5858488	5859721	9779637	9780809	1234	1173	forward	4.64404e-144	1592
1283	7190517	7190961	11151874	11152318	445	445	forward	4.64404e-144	1592
1284	6070636	6069542	611400	612494	1095	1095	reverse	7.30911e-144	1590
1285	985142	984408	6536791	6537525	735	735	reverse	9.16957e-144	1589
1286	7612606	7611557	6608252	6609301	1050	1050	reverse	1.15036e-143	1588
1287	9360234	9360694	3237905	3238365	461	461	forward	1.15036e-143	1588
1288	3282865	3283850	7757164	7758143	986	980	forward	1.15036e-143	1588
1289	7190519	7190957	9198971	9199409	439	439	forward	1.44317e-143	1587
1290	6554720	6554223	1438341	1438838	498	498	reverse	1.81051e-143	1586
1291	4402932	4401820	5499856	5500968	1113	1113	reverse	2.27136e-143	1585
1292	7489342	7490349	12511376	12512374	1008	999	forward	2.27136e-143	1585
1293	1020119	1019446	3384726	3385398	674	673	reverse	4.48475e-143	1582
1294	1469826	1470376	3809488	3810042	551	555	forward	4.48475e-143	1582
1295	3684454	3685213	7112542	7113307	760	766	forward	5.62629e-143	1581
1296	7220457	7221471	7656539	7657553	1015	1015	forward	5.62629e-143	1581
1297	3708158	3708853	1895587	1896279	696	693	forward	7.0584e-143	1580
1298	7306355	7307305	5929990	5930940	951	951	forward	7.0584e-143	1580
1299	9600523	9601777	5705004	5706257	1255	1254	forward	8.85504e-143	1579
1300	2114300	2115773	5713565	5715077	1474	1513	forward	8.85504e-143	1579
1301	11085591	11084225	12543624	12544993	1367	1370	reverse	1.74841e-142	1576
1302	8396015	8394865	774149	775294	1151	1146	reverse	2.75176e-142	1574
1303	2810107	2809145	6775265	6776236	963	972	reverse	2.75176e-142	1574
1304	7142690	7143702	11013108	11014123	1013	1016	forward	3.4522e-142	1573
1305	1764142	1762616	2999169	3000696	1527	1528	reverse	4.33091e-142	1572
1306	4123496	4122955	4674531	4675073	542	543	reverse	4.33091e-142	1572
1307	8068016	8066904	12312891	12314029	1113	1139	reverse	4.33091e-142	1572
1308	9251864	9253411	7004884	7006428	1548	1545	forward	5.4333e-142	1571
1309	3078548	3079620	6429210	6430305	1073	1096	forward	6.81629e-142	1570
1310	929673	930378	8752955	8753660	706	706	forward	6.81629e-142	1570
1311	10590960	10591831	10806690	10807559	872	870	forward	6.81629e-142	1570
1312	1400363	1401629	12072667	12073938	1267	1272	forward	6.81629e-142	1570
1313	5363234	5362805	3436284	3436713	430	430	reverse	8.5513e-142	1569
1314	9360240	9360695	3108429	3108884	456	456	forward	1.07279e-141	1568
1315	9321103	9321584	3400542	3401023	482	482	forward	1.07279e-141	1568
1316	6636209	6637092	5774239	5775122	884	884	forward	1.07279e-141	1568
1317	6553739	6552792	1439465	1440408	948	944	reverse	1.34586e-141	1567
1318	3939394	3938908	8082401	8082887	487	487	reverse	1.34586e-141	1567
1319	3362175	3360997	8990513	8991689	1179	1177	reverse	1.34586e-141	1567
1320	10383246	10382677	10601165	10601737	570	573	reverse	1.34586e-141	1567
1321	3710030	3710894	1898189	1899029	865	841	forward	1.34586e-141	1567
1322	5878973	5880060	11551905	11552995	1088	1091	forward	1.34586e-141	1567
1323	5981624	5983018	11675418	11676744	1395	1327	forward	1.34586e-141	1567
1324	6323448	6322726	2464248	2464973	723	726	reverse	1.68844e-141	1566
1325	2104195	2103265	11743658	11744588	931	931	reverse	2.11821e-141	1565
1326	573618	572731	6736264	6737151	888	888	reverse	2.65738e-141	1564
1327	2130947	2129561	7059403	7060798	1387	1396	reverse	3.33378e-141	1563
1328	6307004	6307881	1223906	1224783	878	878	forward	5.24693e-141	1561
1329	11027965	11029072	8254421	8255519	1108	1099	forward	5.24693e-141	1561
1330	2846863	2845995	953212	954075	869	864	reverse	6.58248e-141	1560
1331	2803296	2802088	6779911	6781116	1209	1206	reverse	6.58248e-141	1560
1332	4429939	4431225	5449827	5451110	1287	1284	forward	6.58248e-141	1560
1333	2334666	2335231	10601171	10601739	566	569	forward	6.58248e-141	1560
1334	10023397	10022787	3436175	3436778	611	604	reverse	1.036e-140	1558
1335	9321609	9321024	8082378	8082970	586	593	reverse	1.036e-140	1558
1336	10757165	10757950	3555401	3556186	786	786	forward	1.036e-140	1558
1337	2928388	2929331	8206829	8207772	944	944	forward	1.036e-140	1558
1338	10624756	10625762	10270373	10271380	1007	1008	forward	1.036e-140	1558
1339	5892357	5893164	11574091	11574898	808	808	forward	1.2997e-140	1557
1340	5749560	5750815	83105	84360	1256	1256	forward	2.04555e-140	1555
1341	9401039	9401971	3643743	3644672	933	930	forward	2.04555e-140	1555
1342	3543495	3542495	1576847	1577847	1001	1001	reverse	2.56622e-140	1554
1343	9650873	9649906	2783951	2784912	968	962	reverse	2.56622e-140	1554
1344	2050220	2049382	11469186	11470023	839	838	reverse	4.0389e-140	1552
1345	10243586	10242912	5374322	5374996	675	675	reverse	5.06695e-140	1551
1346	10226413	10224598	5394870	5396682	1816	1813	reverse	5.06695e-140	1551
1347	1546875	1546373	8306436	8306938	503	503	reverse	6.35669e-140	1550
1348	818807	817927	12069820	12070697	881	878	reverse	6.35669e-140	1550
1349	4320446	4321814	12055890	12057261	1369	1372	forward	6.35669e-140	1550
1350	2422844	2421956	9322005	9322939	889	935	reverse	7.97472e-140	1549
1351	6535654	6534180	10323668	10325145	1475	1478	reverse	1.00046e-139	1548
1352	3221281	3221759	2992641	2993117	479	477	forward	1.00046e-139	1548
1353	4886133	4887058	12123734	12124658	926	925	forward	1.00046e-139	1548
1354	8994327	8993434	2873038	2873928	894	891	reverse	1.25512e-139	1547
1355	836929	835479	11882476	11883926	1451	1451	reverse	1.25512e-139	1547
1356	4854370	4855114	10234717	10235461	745	745	forward	1.25512e-139	1547
1357	9475909	9474691	4892273	4893490	1219	1218	reverse	1.57459e-139	1546
1358	8806521	8805563	6364822	6365780	959	959	reverse	1.57459e-139	1546
1359	8750401	8751266	6035709	6036574	866	866	forward	1.57459e-139	1546
1360	2944227	2945091	8224177	8225041	865	865	forward	1.97539e-139	1545
1361	6554688	6554223	3337746	3338211	466	466	reverse	2.4782e-139	1544
1362	5924588	5925602	11621955	11622975	1015	1021	forward	3.90036e-139	1542
1363	2900168	2899232	988747	989689	937	943	reverse	4.89315e-139	1541
1364	4426250	4424870	5736727	5738109	1381	1383	reverse	4.89315e-139	1541
1365	395726	395261	1438373	1438838	466	466	reverse	6.13865e-139	1540
1366	4016740	4015792	4749154	4750096	949	943	reverse	6.13865e-139	1540
1367	10167586	10166619	8503363	8504330	968	968	reverse	6.13865e-139	1540
1368	2334645	2335228	7312531	7313117	584	587	forward	6.13865e-139	1540
1369	3437118	3438185	9676450	9677518	1068	1069	forward	6.13865e-139	1540
1370	5759775	5760992	82957	84174	1218	1218	forward	7.70117e-139	1539
1371	6579556	6580476	6859101	6859959	921	859	forward	1.21206e-138	1537
1372	2469257	2468430	7598312	7599145	828	834	reverse	1.52058e-138	1536
1373	7887979	7889073	10703437	10704531	1095	1095	forward	1.90763e-138	1535
1374	420485	419276	4614149	4615350	1210	1202	reverse	2.39319e-138	1534
1375	178412	177347	4032243	4033311	1066	1069	reverse	3.76657e-138	1532
1376	1555682	1554466	8296829	8298022	1217	1194	reverse	3.76657e-138	1532
1377	1664137	1665837	7474751	7476454	1701	1704	forward	3.76657e-138	1532
1378	5518881	5519683	12049363	12050173	803	811	forward	4.72531e-138	1531
1379	7058442	7057894	3868496	3869050	549	555	reverse	9.33002e-138	1528
1380	6491744	6489994	5337317	5339073	1751	1757	reverse	9.33002e-138	1528
1381	10023279	10022859	7371517	7371937	421	421	reverse	9.33002e-138	1528
1382	7475715	7477269	1726165	1727701	1555	1537	forward	9.33002e-138	1528
1383	4431354	4429939	10048613	10050028	1416	1416	reverse	1.17049e-137	1527
1384	3766050	3767053	5870015	5871018	1004	1004	forward	1.17049e-137	1527
1385	9652210	9651591	2781965	2782584	620	620	reverse	1.84219e-137	1525
1386	8422809	8423864	1857133	1858188	1056	1056	forward	1.84219e-137	1525
1387	6412368	6411388	2573444	2574426	981	983	reverse	2.89937e-137	1523
1388	9424048	9425139	8402824	8403918	1092	1095	forward	2.89937e-137	1523
1389	8522652	8523302	11070130	11070780	651	651	forward	3.63737e-137	1522
1390	5214623	5213551	1336873	1337954	1073	1082	reverse	5.72474e-137	1520
1391	6087367	6088212	613540	614385	846	846	forward	5.72474e-137	1520
1392	10654632	10653153	4085806	4087292	1480	1487	reverse	7.18191e-137	1519
1393	3939912	3940820	3127859	3128767	909	909	forward	7.18191e-137	1519
1394	4660305	4658609	6494405	6496088	1697	1684	reverse	1.13034e-136	1517
1395	1626178	1625688	9198913	9199405	491	493	reverse	1.13034e-136	1517
1396	4068207	4066952	3940651	3941909	1256	1259	reverse	1.41805e-136	1516
1397	9689140	9688343	2735326	2736126	798	801	reverse	2.23183e-136	1514
1398	4123557	4122957	2992531	2993116	601	586	reverse	2.79992e-136	1513
1399	7918218	7919266	188971	190018	1049	1048	forward	2.79992e-136	1513
1400	6712296	6713461	1534870	1536035	1166	1166	forward	2.79992e-136	1513
1401	8868677	8867898	1926967	1927743	780	777	reverse	4.4067e-136	1511
1402	3490604	3491875	6474886	6476212	1272	1327	forward	4.4067e-136	1511
1403	7008899	7008017	10842794	10843679	883	886	reverse	6.93556e-136	1509
1404	3221225	3221761	4674541	4675074	537	534	forward	8.70093e-136	1508
1405	10384640	10383698	7311078	7312017	943	940	reverse	1.36941e-135	1506
1406	338141	337684	3108423	3108880	458	458	reverse	2.15527e-135	1504
1407	9366659	9368111	9368760	9370203	1453	1444	forward	2.70388e-135	1503
1408	6062432	6061515	589264	590181	918	918	reverse	3.39212e-135	1502
1409	99967	101086	1842478	1843597	1120	1120	forward	3.39212e-135	1502
1410	8553469	8554091	4224493	4225123	623	631	forward	3.39212e-135	1502
1411	2601501	2602584	9533841	9534880	1084	1040	forward	3.39212e-135	1502
1412	9851004	9849125	1656226	1658145	1880	1920	reverse	4.25554e-135	1501
1413	4102357	4101300	4764450	4765507	1058	1058	reverse	5.33874e-135	1500
1414	5394767	5393533	5248252	5249459	1235	1208	reverse	6.69766e-135	1499
1415	11101036	11099644	7813238	7814666	1393	1429	reverse	8.40248e-135	1498
1416	1626125	1625688	11151873	11152310	438	438	reverse	1.05412e-134	1497
1417	10367334	10366877	7155484	7155941	458	458	reverse	1.32244e-134	1496
1418	9984821	9983853	3483205	3484128	969	924	reverse	1.65905e-134	1495
1419	8104104	8104890	9150572	9151355	787	784	forward	1.65905e-134	1495
1420	2277740	2279416	733519	735194	1677	1676	forward	2.61113e-134	1493
1421	8006715	8005491	5471571	5472794	1225	1224	reverse	6.46792e-134	1489
1422	291493	290555	7909756	7910694	939	939	reverse	8.11426e-134	1488
1423	21955	23324	12055890	12057262	1370	1373	forward	1.01797e-133	1487
1424	6522130	6522934	4057455	4058252	805	798	forward	1.27708e-133	1486
1425	4657838	4656079	6496853	6498618	1760	1766	reverse	2.52156e-133	1483
1426	2969239	2969971	2278264	2278996	733	733	forward	2.52156e-133	1483
1427	2105793	2104619	11741977	11743208	1175	1232	reverse	6.24606e-133	1479
1428	11118894	11117969	7791493	7792418	926	926	reverse	9.83048e-133	1477
1429	6392910	6393944	2564953	2565987	1035	1035	forward	9.83048e-133	1477
1430	4734378	4735143	8615475	8616239	766	765	forward	1.23327e-132	1476
1431	6354998	6354241	2428101	2428855	758	755	reverse	1.54719e-132	1475
1432	5685521	5684472	5326742	5327797	1050	1056	reverse	1.94101e-132	1474
1433	896547	898225	170976	172663	1679	1688	forward	2.43507e-132	1473
1434	4471943	4471025	4163033	4163952	919	920	reverse	3.83248e-132	1471
1435	8399598	8398611	9727187	9728180	988	994	reverse	3.83248e-132	1471
1436	3275200	3274108	9415039	9416131	1093	1093	reverse	9.49328e-132	1467
1437	3558814	3559879	4702596	4703664	1066	1069	forward	9.49328e-132	1467
1438	4153857	4154972	4646042	4647155	1116	1114	forward	1.19097e-131	1466
1439	7451504	7452501	9007148	9008139	998	992	forward	1.49412e-131	1465
1440	4122063	4121314	4676647	4677396	750	750	reverse	1.87443e-131	1464
1441	5245012	5245722	11762798	11763493	711	696	forward	2.9501e-131	1462
1442	847180	847758	11852031	11852603	579	573	forward	7.30758e-131	1458
1443	956914	957454	10775476	10776011	541	536	forward	9.16765e-131	1457
1444	4615135	4614402	7079801	7080531	734	731	reverse	1.15012e-130	1456
1445	2778235	2779451	908919	910123	1217	1205	forward	1.15012e-130	1456
1446	4393519	4394823	5467033	5468336	1305	1304	forward	1.15012e-130	1456
1447	5336509	5335350	2043994	2045149	1160	1156	reverse	1.44287e-130	1455
1448	6569489	6568138	4316514	4317843	1352	1330	reverse	1.44287e-130	1455
1449	4493052	4491813	4564073	4565324	1240	1252	reverse	1.44287e-130	1455
1450	11084213	11085390	6416682	6417863	1178	1182	forward	1.44287e-130	1455
1451	1749875	1748806	9177104	9178170	1070	1067	reverse	2.27088e-130	1453
1452	5284139	5283236	1972142	1973042	904	901	reverse	2.84891e-130	1452
1453	9792006	9793114	2905534	2906635	1109	1102	forward	4.48381e-130	1450
1454	7014770	7013535	10831331	10832563	1236	1233	reverse	5.62511e-130	1449
1455	7057926	7058449	10917161	10917687	524	527	forward	8.85319e-130	1447
1456	4930162	4929326	771294	772130	837	837	reverse	1.11067e-129	1446
1457	5104028	5102969	3204561	3205614	1060	1054	reverse	1.11067e-129	1446
1458	11025767	11026659	8252436	8253322	893	887	forward	1.39337e-129	1445
1459	3327368	3328430	4427733	4428799	1063	1067	forward	1.74804e-129	1444
1460	6449428	6450460	985630	986662	1033	1033	forward	2.19299e-129	1443
1461	8824814	8823524	6343961	6345307	1291	1347	reverse	2.75119e-129	1442
1462	2816270	2817953	6788093	6789767	1684	1675	forward	2.75119e-129	1442
1463	10162069	10160446	1183601	1185233	1624	1633	reverse	4.33001e-129	1440
1464	4437783	4436366	3550348	3551759	1418	1412	reverse	5.43216e-129	1439
1465	4500287	4499188	4555870	4556971	1100	1102	reverse	5.43216e-129	1439
1466	9598138	9599775	5702601	5704241	1638	1641	forward	8.54951e-129	1437
1467	2629489	2628732	424492	425250	758	759	reverse	1.07257e-128	1436
1468	10483581	10484822	2616034	2617263	1242	1230	forward	1.07257e-128	1436
1469	7321179	7322080	5953940	5954835	902	896	forward	1.07257e-128	1436
1470	10605522	10606518	8124680	8125673	997	994	forward	1.07257e-128	1436
1471	4680531	4679528	1869644	1870647	1004	1004	reverse	1.34558e-128	1435
1472	7451540	7452500	10324137	10325097	961	961	forward	1.68808e-128	1434
1473	6295084	6293705	7746850	7748221	1380	1372	reverse	2.11777e-128	1433
1474	2279662	2280638	735434	736401	977	968	forward	2.11777e-128	1433
1475	10153089	10151800	1704965	1706261	1290	1297	reverse	2.65682e-128	1432
1476	6439773	6440889	2626682	2627795	1117	1114	forward	2.65682e-128	1432
1477	3592763	3593907	4808806	4809959	1145	1154	forward	3.33308e-128	1431
1478	1173624	1174738	9044167	9045284	1115	1118	forward	3.33308e-128	1431
1479	8982436	8981540	8062422	8063339	897	918	reverse	5.24583e-128	1429
1480	377465	376605	3358289	3359149	861	861	reverse	8.25625e-128	1427
1481	5887337	5888173	11563619	11564455	837	837	forward	1.03578e-127	1426
1482	360874	361565	3583315	3584006	692	692	forward	1.29942e-127	1425
1483	3076691	3077628	6427395	6428331	938	937	forward	1.63018e-127	1424
1484	522255	521306	7289743	7290695	950	953	reverse	2.04512e-127	1423
1485	10522917	10523556	2377763	2378402	640	640	forward	2.04512e-127	1423
1486	5010806	5009616	2483479	2484668	1191	1190	reverse	2.56569e-127	1422
1487	6836783	6835917	3235280	3236146	867	867	reverse	2.56569e-127	1422
1488	8423026	8424100	1857026	1858100	1075	1075	forward	2.56569e-127	1422
1489	5749391	5750540	5736688	5737837	1150	1150	forward	2.56569e-127	1422
1490	4650283	4651776	8652096	8653584	1494	1489	forward	5.06589e-127	1419
1491	4120426	4119312	4678423	4679537	1115	1115	reverse	6.35536e-127	1418
1492	3739976	3740613	10681424	10682055	638	632	forward	7.97305e-127	1417
1493	5808500	5807613	8445927	8446811	888	885	reverse	1.00025e-126	1416
1494	6534219	6535040	10345905	10346725	822	821	forward	1.00025e-126	1416
1495	4221636	4220242	12055890	12057287	1395	1398	reverse	2.47768e-126	1412
1496	9440401	9441389	8425056	8426044	989	989	forward	4.89213e-126	1409
1497	4841523	4842686	8776567	8777681	1164	1115	forward	6.13736e-126	1408
1498	8021230	8020473	10357269	10358029	758	761	reverse	7.69956e-126	1407
1499	955564	956331	10774488	10775264	768	777	forward	9.6594e-126	1406
1500	5434255	5434873	7340320	7340935	619	616	forward	1.52026e-125	1404
1501	758750	757590	3607833	3609007	1161	1175	reverse	1.90723e-125	1403
1502	9498821	9497852	6112919	6113915	970	997	reverse	1.90723e-125	1403
1503	10215225	10214238	8849587	8850574	988	988	reverse	1.90723e-125	1403
1504	2696769	2697701	7036763	7037696	933	934	forward	1.90723e-125	1403
1505	10949671	10948384	10685083	10686368	1288	1286	reverse	2.39269e-125	1402
1506	3975228	3976278	4537799	4538849	1051	1051	forward	3.00173e-125	1401
1507	389205	388475	3345029	3345762	731	734	reverse	3.76578e-125	1400
1508	9334061	9333326	8381653	8382388	736	736	reverse	4.72432e-125	1399
1509	8479937	8478741	11117901	11119109	1197	1209	reverse	4.72432e-125	1399
1510	1083095	1083644	6052960	6053511	550	552	forward	4.72432e-125	1399
1511	3176235	3175019	511807	513026	1217	1220	reverse	7.43546e-125	1397
1512	9693939	9692863	2730607	2731686	1077	1080	reverse	7.43546e-125	1397
1513	3148762	3147483	8515564	8516773	1280	1210	reverse	7.43546e-125	1397
1514	7667405	7666941	3968931	3969395	465	465	reverse	9.32807e-125	1396
1515	2101500	2102226	10584193	10584919	727	727	forward	9.32807e-125	1396
1516	7928175	7928891	5804430	5805103	717	674	forward	1.17024e-124	1395
1517	99985	100993	5440415	5441423	1009	1009	forward	1.46812e-124	1394
1518	1672100	1671257	261535	262379	844	845	reverse	1.84181e-124	1393
1519	581795	580756	5637569	5638607	1040	1039	reverse	1.84181e-124	1393
1520	4717365	4716459	8671501	8672407	907	907	reverse	2.31062e-124	1392
1521	1138404	1137365	8897566	8898582	1040	1017	reverse	2.31062e-124	1392
1522	10853639	10854166	4494109	4494636	528	528	forward	2.31062e-124	1392
1523	1641358	1640885	10917211	10917681	474	471	reverse	3.63661e-124	1390
1524	4012413	4011548	4752794	4753664	866	871	reverse	5.72354e-124	1388
1525	7083370	7084962	5713483	5715075	1593	1593	forward	5.72354e-124	1388
1526	315181	314704	3261472	3261951	478	480	reverse	7.18041e-124	1387
1527	9223465	9221968	7251015	7252521	1498	1507	reverse	7.18041e-124	1387
1528	1714857	1716158	3016333	3017617	1302	1285	forward	7.18041e-124	1387
1529	5384864	5386064	5231333	5232538	1201	1206	forward	7.18041e-124	1387
1530	4756033	4756750	8636475	8637195	718	721	forward	7.18041e-124	1387
1531	10331899	10332583	11659913	11660606	685	694	forward	1.77863e-123	1383
1532	2214986	2215887	668261	669158	902	898	forward	2.23136e-123	1382
1533	10069873	10068850	1685455	1686481	1024	1027	reverse	3.51187e-123	1380
1534	1188318	1189286	9059727	9060695	969	969	forward	3.51187e-123	1380
1535	3793992	3792941	468774	469819	1052	1046	reverse	4.40578e-123	1379
1536	1688957	1688254	2794338	2795055	704	718	reverse	4.40578e-123	1379
1537	5607256	5606217	9108249	9109211	1040	963	reverse	5.52722e-123	1378
1538	8575694	8574609	12478020	12479105	1086	1086	reverse	5.52722e-123	1378
1539	10853683	10854166	4494201	4494684	484	484	forward	5.52722e-123	1378
1540	2374581	2375039	7137371	7137827	459	457	forward	5.52722e-123	1378
1541	3646167	3645186	299634	300625	982	992	reverse	6.93411e-123	1377
1542	3185470	3184640	3495021	3495851	831	831	reverse	6.93411e-123	1377
1543	9641779	9642185	3969000	3969406	407	407	forward	8.69911e-123	1376
1544	6637432	6638142	5775476	5776195	711	720	forward	8.69911e-123	1376
1545	7157451	7158336	11034756	11035632	886	877	forward	8.69911e-123	1376
1546	2166378	2165763	4351314	4351929	616	616	reverse	1.09134e-122	1375
1547	3314781	3314326	6624244	6624699	456	456	reverse	1.71762e-122	1373
1548	5606834	5607253	4699823	4700239	420	417	forward	2.15482e-122	1372
1549	8712423	8711289	212085	213210	1135	1126	reverse	5.33763e-122	1368
1550	6887926	6886459	490549	492016	1468	1468	reverse	5.33763e-122	1368
1551	10433102	10431587	2237048	2238557	1516	1510	reverse	5.33763e-122	1368
1552	1170394	1171132	7652690	7653428	739	739	forward	5.33763e-122	1368
1553	9273023	9273965	324221	325168	943	948	forward	6.69626e-122	1367
1554	4840665	4841127	10775547	10776008	463	462	forward	6.69626e-122	1367
1555	7992836	7991478	10037377	10038732	1359	1356	reverse	8.40072e-122	1366
1556	4393496	4394875	3749930	3751315	1380	1386	forward	2.08091e-121	1362
1557	7736187	7736923	6048525	6049258	737	734	forward	2.08091e-121	1362
1558	6640273	6639295	5764618	5765596	979	979	reverse	2.61058e-121	1361
1559	7838894	7837553	812547	813973	1342	1427	reverse	3.27508e-121	1360
1560	307048	306260	3270247	3271035	789	789	reverse	3.27508e-121	1360
1561	8352023	8351148	5110433	5111314	876	882	reverse	3.27508e-121	1360
1562	8953660	8953195	12215383	12215850	466	468	reverse	3.27508e-121	1360
1563	7879162	7879753	4278725	4279316	592	592	forward	3.27508e-121	1360
1564	3404672	3405584	4342521	4343439	913	919	forward	3.27508e-121	1360
1565	2190813	2192125	637053	638365	1313	1313	forward	4.10871e-121	1359
1566	7278205	7276655	6019014	6020572	1551	1559	reverse	5.15454e-121	1358
1567	5534453	5533380	6910293	6911364	1074	1072	reverse	5.15454e-121	1358
1568	10284969	10285773	3791834	3792633	805	800	forward	5.15454e-121	1358
1569	7451079	7451912	10323676	10324515	834	840	forward	5.15454e-121	1358
1570	8878483	8878019	1916815	1917279	465	465	reverse	8.11256e-121	1356
1571	1090208	1091285	6060254	6061328	1078	1075	forward	1.01775e-120	1355
1572	356864	357530	4638819	4639486	667	668	forward	1.27681e-120	1354
1573	9673767	9672789	2756623	2757591	979	969	reverse	2.52104e-120	1351
1574	246937	246241	7957693	7958383	697	691	reverse	3.16274e-120	1350
1575	10698248	10697572	4612152	4612828	677	677	reverse	6.24476e-120	1347
1576	3004204	3003029	7899965	7901141	1176	1177	reverse	6.24476e-120	1347
1577	4390282	4388976	10037410	10038716	1307	1307	reverse	6.24476e-120	1347
1578	10853683	10854120	4494249	4494686	438	438	forward	6.24476e-120	1347
1579	6968247	6969207	11843488	11844457	961	970	forward	6.24476e-120	1347
1580	7544618	7543826	859894	860686	793	793	reverse	7.83429e-120	1346
1581	334024	332317	3243372	3245097	1708	1726	reverse	7.83429e-120	1346
1582	9690052	9689426	2734320	2734946	627	627	reverse	9.82843e-120	1345
1583	711637	712500	5046833	5047696	864	864	forward	9.82843e-120	1345
1584	1408042	1409122	12080638	12081736	1081	1099	forward	9.82843e-120	1345
1585	9782389	9781560	1754788	1755602	830	815	reverse	1.54686e-119	1343
1586	2268702	2269353	724503	725154	652	652	forward	1.54686e-119	1343
1587	4182681	4181588	6176814	6177907	1094	1094	reverse	1.9406e-119	1342
1588	1305084	1306211	2071984	2073108	1128	1125	forward	1.9406e-119	1342
1589	9863096	9862035	1643963	1645024	1062	1062	reverse	2.43456e-119	1341
1590	10287924	10288942	3794790	3795861	1019	1072	forward	2.43456e-119	1341
1591	5598698	5597722	3210301	3211278	977	978	reverse	3.05425e-119	1340
1592	4141212	4140251	9009693	9010645	962	953	reverse	3.05425e-119	1340
1593	7213040	7212272	9170660	9171404	769	745	reverse	3.05425e-119	1340
1594	3655163	3654406	290528	291282	758	755	reverse	6.03055e-119	1337
1595	2339261	2340968	12346206	12347919	1708	1714	forward	7.56557e-119	1336
1596	7083377	7084962	10023445	10025021	1586	1577	forward	9.4913e-119	1335
1597	8611335	8612315	11745598	11746536	981	939	forward	9.4913e-119	1335
1598	3557744	3557315	9108251	9108680	430	430	reverse	1.19072e-118	1334
1599	2202536	2203209	651176	651849	674	674	forward	1.19072e-118	1334
1600	107892	108918	10037314	10038340	1027	1027	forward	1.19072e-118	1334
1601	10676861	10675952	4060243	4061141	910	899	reverse	1.4938e-118	1333
1602	2976746	2977621	2288687	2289556	876	870	forward	1.4938e-118	1333
1603	811378	810453	3661453	3662382	926	930	reverse	1.87404e-118	1332
1604	315182	314714	10257033	10257501	469	469	reverse	1.87404e-118	1332
1605	5361601	5361196	7373063	7373465	406	403	reverse	2.35105e-118	1331
1606	7452500	7451097	10352023	10353420	1404	1398	reverse	2.35105e-118	1331
1607	4840675	4841150	8775618	8776094	476	477	forward	2.35105e-118	1331
1608	9388073	9387096	8857229	8858203	978	975	reverse	2.94949e-118	1330
1609	9723388	9724252	2695168	2696102	865	935	forward	2.94949e-118	1330
1610	8681896	8683229	7491282	7492610	1334	1329	forward	3.70025e-118	1329
1611	10596238	10597106	10812734	10813602	869	869	forward	3.70025e-118	1329
1612	108988	107890	5690932	5692030	1099	1099	reverse	5.8237e-118	1327
1613	1688571	1688970	3969009	3969408	400	400	forward	5.8237e-118	1327
1614	3314097	3313642	6623560	6624015	456	456	reverse	7.30606e-118	1326
1615	3557330	3557778	6944291	6944731	449	441	forward	7.30606e-118	1326
1616	9642175	9641785	2794337	2794727	391	391	reverse	1.14988e-117	1324
1617	3216525	3217287	599148	599910	763	763	forward	1.14988e-117	1324
1618	1525925	1524973	8330029	8330967	953	939	reverse	1.44257e-117	1323
1619	2918400	2919085	8195900	8196585	686	686	forward	1.44257e-117	1323
1620	4212823	4214023	12055890	12057093	1201	1204	forward	1.44257e-117	1323
1621	7557176	7556256	847050	847979	921	930	reverse	1.80975e-117	1322
1622	1564797	1563991	8287544	8288349	807	806	reverse	1.80975e-117	1322
1623	10160454	10161604	6685578	6686733	1151	1156	forward	1.80975e-117	1322
1624	2332334	2333655	8566071	8567376	1322	1306	forward	1.80975e-117	1322
1625	3631378	3630163	9099859	9101068	1216	1210	reverse	2.27041e-117	1321
1626	2415813	2415176	9329302	9329945	638	644	reverse	2.27041e-117	1321
1627	8928186	8928804	2670527	2671145	619	619	forward	3.57332e-117	1319
1628	10148204	10148614	7373062	7373465	411	404	forward	4.48287e-117	1318
1629	7558989	7558187	845129	845925	803	797	reverse	5.62394e-117	1317
1630	5743384	5742333	1364854	1365907	1052	1054	reverse	5.62394e-117	1317
1631	4681115	4680188	1869060	1869987	928	928	reverse	5.62394e-117	1317
1632	226998	225921	4114111	4115182	1078	1072	reverse	5.62394e-117	1317
1633	6409624	6408223	2576495	2577772	1402	1278	reverse	8.85133e-117	1315
1634	7666942	7667328	2794339	2794725	387	387	forward	8.85133e-117	1315
1635	2092484	2093237	10575371	10576129	754	759	forward	1.11043e-116	1314
1636	6830051	6828735	6895736	6897046	1317	1311	reverse	1.39308e-116	1313
1637	7487802	7488692	3314969	3315861	891	893	forward	1.74768e-116	1312
1638	107977	108921	5467034	5467978	945	945	forward	1.74768e-116	1312
1639	199476	199009	4141737	4142204	468	468	reverse	2.19253e-116	1311
1640	551731	550481	6767459	6768709	1251	1251	reverse	2.19253e-116	1311
1641	9779566	9780424	2891326	2892178	859	853	forward	2.75061e-116	1310
1642	10853718	10854200	4494164	4494646	483	483	forward	2.75061e-116	1310
1643	5606840	5607264	6944291	6944714	425	424	forward	2.75061e-116	1310
1644	1067621	1068552	8168594	8169531	932	938	forward	2.75061e-116	1310
1645	4375523	4374056	5445474	5446944	1468	1471	reverse	3.45075e-116	1309
1646	3925920	3926499	10698397	10698976	580	580	forward	3.45075e-116	1309
1647	1335104	1336683	8657753	8659326	1580	1574	forward	4.3291e-116	1308
1648	10377916	10377016	7319447	7320344	901	898	reverse	5.43103e-116	1307
1649	10853683	10854144	4494225	4494686	462	462	forward	5.43103e-116	1307
1650	6534685	6535667	10346370	10347352	983	983	forward	5.43103e-116	1307
1651	10577633	10577113	12404432	12404952	521	521	reverse	1.07234e-115	1304
1652	7725690	7726087	11530462	11530859	398	398	forward	1.07234e-115	1304
1653	3052660	3052003	7845796	7846453	658	658	reverse	1.3453e-115	1303
1654	7247200	7249306	6198652	6200718	2107	2067	forward	1.3453e-115	1303
1655	5692006	5690799	3067441	3068640	1208	1200	reverse	1.68773e-115	1302
1656	6642762	6641698	5762204	5763271	1065	1068	reverse	2.11732e-115	1301
1657	8321994	8320807	5082202	5083346	1188	1145	reverse	2.65626e-115	1300
1658	2476645	2477394	6581643	6582389	750	747	forward	2.65626e-115	1300
1659	956994	957450	8775613	8776069	457	457	forward	2.65626e-115	1300
1660	3749815	3750659	9629642	9630483	845	842	forward	2.65626e-115	1300
1661	1518600	1518064	8337893	8338436	537	544	reverse	3.33239e-115	1299
1662	4721367	4722498	8602788	8603922	1132	1135	forward	3.33239e-115	1299
1663	3799659	3799096	5314750	5315317	564	568	reverse	4.18061e-115	1298
1664	9266341	9267032	317508	318199	692	692	forward	4.18061e-115	1298
1665	8866567	8865634	1949877	1950807	934	931	reverse	8.25452e-115	1295
1666	1585666	1584560	8265775	8266872	1107	1098	reverse	8.25452e-115	1295
1667	170620	169419	10389915	10391116	1202	1202	reverse	8.25452e-115	1295
1668	1295997	1296814	2065175	2065989	818	815	forward	8.25452e-115	1295
1669	3027274	3026196	7874455	7875521	1079	1067	reverse	1.03556e-114	1294
1670	4791900	4790920	8724786	8725757	981	972	reverse	1.03556e-114	1294
1671	4818138	4817216	8700461	8701383	923	923	reverse	1.29915e-114	1293
1672	2254545	2255357	708129	708943	813	815	forward	1.62984e-114	1292
1673	9283300	9282488	9889450	9890262	813	813	reverse	2.0447e-114	1291
1674	4346201	4345023	12056183	12057364	1179	1182	reverse	2.0447e-114	1291
1675	5255067	5255654	11724281	11724869	588	589	forward	2.0447e-114	1291
1676	46156	47334	12056183	12057364	1179	1182	forward	2.0447e-114	1291
1677	10867416	10866488	4790031	4790960	929	930	reverse	2.56515e-114	1290
1678	6766659	6767748	5037749	5038841	1090	1093	forward	2.56515e-114	1290
1679	3803401	3804278	9785443	9786312	878	870	forward	4.03721e-114	1288
1680	1500109	1499556	8359309	8359852	554	544	reverse	5.06483e-114	1287
1681	7141626	7142338	11011652	11012364	713	713	forward	5.06483e-114	1287
1682	7159867	7160662	11037988	11038776	796	789	forward	5.06483e-114	1287
1683	4629512	4628798	7063519	7064233	715	715	reverse	6.35403e-114	1286
1684	8861051	8860300	7412775	7413529	752	755	reverse	6.35403e-114	1286
1685	8820184	8819391	6348815	6349602	794	788	reverse	7.97138e-114	1285
1686	8013199	8012268	83426	84357	932	932	reverse	1.00004e-113	1284
1687	5540762	5539939	6903609	6904428	824	820	reverse	1.00004e-113	1284
1688	4536675	4535595	12353530	12354613	1081	1084	reverse	1.00004e-113	1284
1689	8423133	8424173	1857025	1858062	1041	1038	forward	1.00004e-113	1284
1690	5108723	5107736	3198961	3199957	988	997	reverse	1.57393e-113	1282
1691	10680623	10681025	11530460	11530865	403	406	forward	1.57393e-113	1282
1692	7958619	7959200	8090273	8090851	582	579	forward	1.97456e-113	1281
1693	5213115	5212405	1338447	1339157	711	711	reverse	2.47716e-113	1280
1694	6507455	6508366	299652	300563	912	912	forward	2.47716e-113	1280
1695	7785201	7785633	2215815	2216247	433	433	forward	2.47716e-113	1280
1696	7677983	7676849	3955167	3956306	1135	1140	reverse	3.1077e-113	1279
1697	2044938	2044282	11443289	11443947	657	659	reverse	3.1077e-113	1279
1698	9955806	9956664	1490902	1491754	859	853	forward	3.1077e-113	1279
1699	3762619	3763837	2944846	2946055	1219	1210	forward	3.89873e-113	1278
1700	5313831	5314719	1944300	1945188	889	889	forward	7.69795e-113	1275
1701	10680623	10681026	4052851	4053254	404	404	forward	7.69795e-113	1275
1702	9588246	9587043	2852152	2853330	1204	1179	reverse	9.65738e-113	1274
1703	8285946	8285175	9855046	9855816	772	771	reverse	9.65738e-113	1274
1704	1657882	1656985	275578	276475	898	898	reverse	1.21156e-112	1273
1705	9919942	9920987	4201238	4202265	1046	1028	forward	1.21156e-112	1273
1706	8417653	8416698	8023552	8024504	956	953	reverse	1.51994e-112	1272
1707	9997518	9996431	3471036	3472126	1088	1091	reverse	1.90683e-112	1271
1708	7215183	7214126	9168221	9169269	1058	1049	reverse	1.90683e-112	1271
1709	10604442	10605177	8122811	8123546	736	736	forward	2.39219e-112	1270
1710	1464191	1464763	3806283	3806855	573	573	forward	3.76499e-112	1268
1711	3467807	3466352	1590056	1591502	1456	1447	reverse	4.72333e-112	1267
1712	7702162	7701212	3926200	3927153	951	954	reverse	5.9256e-112	1266
1713	316342	315488	3260234	3261097	855	864	reverse	7.4339e-112	1265
1714	3622750	3623163	4699829	4700239	414	411	forward	7.4339e-112	1265
1715	6569466	6568571	4316452	4317350	896	899	reverse	1.17e-111	1263
1716	10171778	10170601	8500572	8501735	1178	1164	reverse	1.17e-111	1263
1717	2009692	2010887	10390035	10391230	1196	1196	forward	1.17e-111	1263
1718	1518601	1518135	4141738	4142204	467	467	reverse	1.46781e-111	1262
1719	3557330	3557746	4699829	4700242	417	414	forward	1.46781e-111	1262
1720	10042289	10043246	9573483	9574516	958	1034	forward	1.46781e-111	1262
1721	3206826	3207487	3521497	3522167	662	671	forward	2.31014e-111	1260
1722	8649802	8650894	3702865	3703977	1093	1113	forward	2.31014e-111	1260
1723	6112100	6111631	1162245	1162714	470	470	reverse	2.89816e-111	1259
1724	7773038	7772603	3261504	3261939	436	436	reverse	3.63585e-111	1258
1725	1296691	1295977	10468247	10468965	715	719	reverse	3.63585e-111	1258
1726	8582116	8583307	12449582	12450770	1192	1189	forward	3.63585e-111	1258
1727	4759831	4759424	10731091	10731501	408	411	reverse	4.56131e-111	1257
1728	10365514	10366094	7175250	7175830	581	581	forward	5.72235e-111	1256
1729	151266	150519	2358570	2359304	748	735	reverse	7.17891e-111	1255
1730	6343317	6342434	9094346	9095229	884	884	reverse	7.17891e-111	1255
1731	2898443	2897671	990672	991450	773	779	reverse	9.00622e-111	1254
1732	3429817	3430726	9671657	9672562	910	906	forward	9.00622e-111	1254
1733	199473	199009	8337894	8338358	465	465	reverse	1.12987e-110	1253
1734	1516262	1515047	8340419	8341646	1216	1228	reverse	1.12987e-110	1253
1735	5801001	5802000	8455379	8456363	1000	985	forward	1.12987e-110	1253
1736	10476592	10477482	2217211	2218101	891	891	forward	1.41746e-110	1252
1737	3761725	3763064	2942992	2944313	1340	1322	forward	1.41746e-110	1252
1738	8493308	8494019	3025193	3025904	712	712	forward	1.41746e-110	1252
1739	1569000	1570458	8277662	8279132	1459	1471	forward	1.41746e-110	1252
1740	7158759	7159181	11036852	11037270	423	419	forward	1.77826e-110	1251
1741	1716550	1717108	3018198	3018756	559	559	forward	2.79875e-110	1249
1742	6955299	6956269	5988615	5989606	971	992	forward	3.51113e-110	1248
1743	3761725	3763064	2943208	2944529	1340	1322	forward	4.40486e-110	1247
1744	10853683	10854096	4494273	4494686	414	414	forward	4.40486e-110	1247
1745	6909126	6910091	7236338	7237297	966	960	forward	4.40486e-110	1247
1746	7855393	7854470	797732	798604	924	873	reverse	5.52606e-110	1246
1747	6295013	6295996	1208848	1209834	984	987	forward	5.52606e-110	1246
1748	4056641	4055763	9034608	9035479	879	872	reverse	6.93266e-110	1245
1749	632760	633525	532432	533194	766	763	forward	6.93266e-110	1245
1750	3960243	3959539	4511033	4511738	705	706	reverse	1.09111e-109	1243
1751	10951668	10952749	5467273	5468357	1082	1085	forward	1.09111e-109	1243
1752	11005357	11004803	4281542	4282093	555	552	reverse	1.36884e-109	1242
1753	8837591	8836642	6330126	6331078	950	953	reverse	1.36884e-109	1242
1754	3033110	3032565	7868505	7869047	546	543	reverse	1.36884e-109	1242
1755	8616188	8614963	10037298	10038515	1226	1218	reverse	1.36884e-109	1242
1756	2851658	2850670	943748	944735	989	988	reverse	1.71726e-109	1241
1757	10853748	10854193	4494170	4494615	446	446	forward	1.71726e-109	1241
1758	4654109	4654903	8655926	8656720	795	795	forward	1.71726e-109	1241
1759	4593324	4594645	7096882	7098194	1322	1313	forward	4.25376e-109	1237
1760	616328	615262	2010596	2011623	1067	1028	reverse	5.33651e-109	1236
1761	2451434	2450777	9291725	9292382	658	658	reverse	5.33651e-109	1236
1762	4075535	4077323	12284753	12286568	1789	1816	forward	5.33651e-109	1236
1763	4519802	4518847	7930974	7931923	956	950	reverse	6.69486e-109	1235
1764	4052596	4051665	9023663	9024594	932	932	reverse	6.69486e-109	1235
1765	3635665	3634913	310694	311439	753	746	reverse	1.05368e-108	1233
1766	9949421	9948943	1511796	1512263	479	468	reverse	1.05368e-108	1233
1767	11084203	11085509	6412283	6413592	1307	1310	forward	1.05368e-108	1233
1768	7095285	7094234	7059491	7060542	1052	1052	reverse	1.32189e-108	1232
1769	5350768	5351615	2034480	2035318	848	839	forward	1.65836e-108	1231
1770	10649454	10650194	11422584	11423327	741	744	forward	1.65836e-108	1231
1771	11125665	11124719	7785014	7785963	947	950	reverse	2.08047e-108	1230
1772	1311746	1310762	2059264	2060248	985	985	reverse	2.61004e-108	1229
1773	10477101	10477938	2217720	2218557	838	838	forward	2.61004e-108	1229
1774	3202497	3203435	3516619	3517553	939	935	forward	2.61004e-108	1229
1775	3761723	3763086	2942774	2944119	1364	1346	forward	5.15346e-108	1226
1776	6934050	6932956	1167790	1168887	1095	1098	reverse	6.46522e-108	1225
1777	7773038	7772605	10257066	10257499	434	434	reverse	1.01754e-107	1223
1778	7306916	7307699	5930551	5931330	784	780	forward	1.01754e-107	1223
1779	6022015	6022728	1107104	1107816	714	713	forward	1.27654e-107	1222
1780	11180420	11181122	7435065	7435773	703	709	forward	1.60147e-107	1221
1781	6535465	6534226	83123	84362	1240	1240	reverse	2.00911e-107	1220
1782	1260347	1259651	2115336	2116023	697	688	reverse	2.00911e-107	1220
1783	9167452	9166490	7728651	7729643	963	993	reverse	2.00911e-107	1220
1784	10970475	10969521	10011554	10012508	955	955	reverse	2.00911e-107	1220
1785	7726468	7726892	11531380	11531807	425	428	forward	2.00911e-107	1220
1786	9526969	9526020	7262024	7262967	950	944	reverse	2.52051e-107	1219
1787	8668246	8666674	267238	268825	1573	1588	reverse	3.16208e-107	1218
1788	9532168	9533140	1207883	1208855	973	973	forward	3.16208e-107	1218
1789	4759435	4759831	8639700	8640096	397	397	forward	4.97669e-107	1216
1790	4088387	4088941	12239602	12240156	555	555	forward	4.97669e-107	1216
1791	1244760	1245294	4224578	4225121	535	544	forward	6.24345e-107	1215
1792	5346112	5345313	2013133	2013932	800	800	reverse	7.83265e-107	1214
1793	9710391	9709551	2711459	2712299	841	841	reverse	7.83265e-107	1214
1794	3886845	3886179	12414338	12415004	667	667	reverse	7.83265e-107	1214
1795	3760218	3761746	10001181	10002724	1529	1544	forward	7.83265e-107	1214
1796	8036835	8035752	12268316	12269408	1084	1093	reverse	9.82637e-107	1213
1797	7649383	7650252	6563514	6564383	870	870	forward	9.82637e-107	1213
1798	1367522	1368905	11796759	11798148	1384	1390	forward	9.82637e-107	1213
1799	1320198	1319126	6512113	6513185	1073	1073	reverse	1.23276e-106	1212
1800	8607374	8606498	7675737	7676616	877	880	reverse	1.23276e-106	1212
1801	6714379	6715328	1537037	1537986	950	950	forward	1.23276e-106	1212
1802	5306869	5307695	1936820	1937640	827	821	forward	1.54654e-106	1211
1803	10503822	10504704	3101297	3102180	883	884	forward	1.54654e-106	1211
1804	2017716	2018443	4090621	4091345	728	725	forward	1.9402e-106	1210
1805	3554933	3555880	4697223	4698173	948	951	forward	1.9402e-106	1210
1806	11176130	11175651	1055163	1055642	480	480	reverse	2.43405e-106	1209
1807	4475218	4474687	4159855	4160386	532	532	reverse	2.43405e-106	1209
1808	4185477	4184609	6174028	6174890	869	863	reverse	2.43405e-106	1209
1809	3630541	3629703	9100690	9101528	839	839	reverse	2.43405e-106	1209
1810	8424137	8422958	10002502	10003651	1180	1150	reverse	2.43405e-106	1209
1811	7718436	7717730	3907596	3908302	707	707	reverse	3.05361e-106	1208
1812	7178061	7177348	9220355	9221077	714	723	reverse	3.05361e-106	1208
1813	8422809	8423657	1857349	1858197	849	849	forward	3.05361e-106	1208
1814	6813008	6813932	9878251	9879181	925	931	forward	3.05361e-106	1208
1815	5899234	5900399	11579988	11581156	1166	1169	forward	3.05361e-106	1208
1816	10398821	10397615	225896	227123	1207	1228	reverse	3.83088e-106	1207
1817	250806	250130	7953481	7954157	677	677	reverse	3.83088e-106	1207
1818	5134135	5135038	1240570	1241470	904	901	forward	3.83088e-106	1207
1819	9194773	9195591	7737955	7738776	819	822	forward	3.83088e-106	1207
1820	1143827	1143029	8890834	8891629	799	796	reverse	4.80598e-106	1206
1821	63982	62943	12055890	12056932	1040	1043	reverse	4.80598e-106	1206
1822	6859271	6860685	4931498	4932911	1415	1414	forward	4.80598e-106	1206
1823	442469	443297	6866539	6867373	829	835	forward	4.80598e-106	1206
1824	9599110	9598175	2839957	2840892	936	936	reverse	6.02929e-106	1205
1825	1728821	1727558	8837907	8839167	1264	1261	reverse	6.02929e-106	1205
1826	2709744	2709055	10531777	10532466	690	690	reverse	6.02929e-106	1205
1827	595446	596062	5218875	5219474	617	600	forward	6.02929e-106	1205
1828	9949425	9949026	1162239	1162638	400	400	reverse	7.56398e-106	1204
1829	4564837	4564038	355063	355861	800	799	reverse	1.19047e-105	1202
1830	4625819	4624727	7067331	7068480	1093	1150	reverse	1.19047e-105	1202
1831	9496949	9496569	9397642	9398021	381	380	reverse	1.19047e-105	1202
1832	6709727	6710679	1532246	1533193	953	948	forward	1.19047e-105	1202
1833	10272540	10273274	10912477	10913211	735	735	forward	1.19047e-105	1202
1834	8434788	8433814	1857224	1858197	975	974	reverse	1.49349e-105	1201
1835	4787865	4786613	8729885	8731131	1253	1247	reverse	1.49349e-105	1201
1836	8288718	8287844	9851601	9852475	875	875	reverse	1.49349e-105	1201
1837	3763839	3762644	11611869	11613058	1196	1190	reverse	1.49349e-105	1201
1838	9847958	9847145	1659221	1660034	814	814	reverse	1.87364e-105	1200
1839	10853772	10854207	4494170	4494601	436	432	forward	2.35056e-105	1199
1840	5666339	5667563	7573604	7574831	1225	1228	forward	2.94887e-105	1198
1841	8928433	8929113	2670774	2671454	681	681	forward	3.69947e-105	1197
1842	7083425	7084971	4363004	4364513	1547	1510	forward	4.64113e-105	1196
1843	10305540	10306516	11640368	11641351	977	984	forward	4.64113e-105	1196
1844	755015	754062	2516846	2517796	954	951	reverse	5.82248e-105	1195
1845	10112940	10112551	12058296	12058685	390	390	reverse	9.16381e-105	1193
1846	10112555	10112946	8359332	8359723	392	392	forward	1.14964e-104	1192
1847	1404269	1405117	12076094	12076942	849	849	forward	1.14964e-104	1192
1848	9816626	9816062	9967550	9968114	565	565	reverse	1.44226e-104	1191
1849	9943890	9942970	1517665	1518585	921	921	reverse	3.57257e-104	1187
1850	1461091	1459960	4959354	4960485	1132	1132	reverse	3.57257e-104	1187
1851	5422248	5423446	2027399	2028575	1199	1177	forward	3.57257e-104	1187
1852	7234940	7235373	6182814	6183244	434	431	forward	3.57257e-104	1187
1853	3892599	3893681	7964595	7965672	1083	1078	forward	3.57257e-104	1187
1854	8460089	8459520	1831010	1831576	570	567	reverse	4.48193e-104	1186
1855	273395	272669	7930172	7930896	727	725	reverse	4.48193e-104	1186
1856	1147300	1146151	8886660	8887811	1150	1152	reverse	4.48193e-104	1186
1857	2761788	2762775	889680	890667	988	988	forward	5.62276e-104	1185
1858	4848454	4849739	8784384	8785691	1286	1308	forward	7.05397e-104	1184
1859	9319144	9318603	8085035	8085579	542	545	reverse	8.84948e-104	1183
1860	131549	132751	4389141	4390339	1203	1199	forward	8.84948e-104	1183
1861	6689200	6687853	1559441	1560793	1348	1353	reverse	1.1102e-103	1182
1862	2597476	2598443	9529567	9530539	968	973	forward	1.1102e-103	1182
1863	7699902	7699234	3928968	3929636	669	669	reverse	1.39279e-103	1181
1864	2836597	2837305	6810153	6810857	709	705	forward	1.39279e-103	1181
1865	9966365	9965691	560982	561656	675	675	reverse	1.74731e-103	1180
1866	2561678	2560950	9499923	9500651	729	729	reverse	2.19207e-103	1179
1867	1755284	1754349	11482743	11483681	936	939	reverse	2.19207e-103	1179
1868	5736318	5736957	1410473	1411112	640	640	forward	2.19207e-103	1179
1869	7725680	7726087	4052843	4053247	408	405	forward	2.19207e-103	1179
1870	732135	731278	5068221	5069063	858	843	reverse	2.75004e-103	1178
1871	8978034	8977204	8068360	8069190	831	831	reverse	2.75004e-103	1178
1872	6112100	6111706	1511798	1512192	395	395	reverse	3.45003e-103	1177
1873	223322	221686	4117318	4118957	1637	1640	reverse	3.45003e-103	1177
1874	10967000	10966122	5178390	5179267	879	878	reverse	3.45003e-103	1177
1875	8494062	8493325	7019859	7020595	738	737	reverse	3.45003e-103	1177
1876	8487250	8487599	3019660	3020012	350	353	forward	3.45003e-103	1177
1877	1245292	1244762	2131895	2132428	531	534	reverse	4.3282e-103	1176
1878	3073926	3074671	7838335	7839077	746	743	forward	4.3282e-103	1176
1879	7235362	7234960	11036865	11037267	403	403	reverse	6.81201e-103	1174
1880	10610368	10611387	8129325	8130353	1020	1029	forward	6.81201e-103	1174
1881	10061413	10060960	3415656	3416115	454	460	reverse	8.54593e-103	1173
1882	3693175	3693626	7121727	7122178	452	452	forward	8.54593e-103	1173
1883	4876460	4877132	12112110	12112782	673	673	forward	8.54593e-103	1173
1884	5952706	5953511	11340554	11341374	806	821	forward	1.68738e-102	1170
1885	5544641	5543870	6938613	6939384	772	772	reverse	2.65571e-102	1168
1886	240965	240311	9022400	9023050	655	651	reverse	2.65571e-102	1168
1887	10601495	10602504	8119876	8120882	1010	1007	forward	2.65571e-102	1168
1888	9315415	9316322	11975026	11975936	908	911	forward	3.33169e-102	1167
1889	4768496	4767703	1528067	1528860	794	794	reverse	4.17973e-102	1166
1890	108880	107886	5489986	5490977	995	992	reverse	4.17973e-102	1166
1891	8550460	8551451	4220761	4221752	992	992	forward	4.17973e-102	1166
1892	5776995	5777769	8791820	8792608	775	789	forward	4.17973e-102	1166
1893	8211286	8212290	10162855	10163859	1005	1005	forward	4.17973e-102	1166
1894	176307	175659	4034296	4034950	649	655	reverse	5.24364e-102	1165
1895	7451055	7451849	9006696	9007493	795	798	forward	5.24364e-102	1165
1896	8434798	8433881	1856892	1857806	918	915	reverse	6.57835e-102	1164
1897	8994325	8993326	8048199	8049198	1000	1000	reverse	6.57835e-102	1164
1898	9496930	9496567	6114762	6115125	364	364	reverse	8.2528e-102	1163
1899	8011477	8010629	9629632	9630474	849	843	reverse	8.2528e-102	1163
1900	2233047	2233678	687369	688000	632	632	forward	8.2528e-102	1163
1901	10153948	10154706	1719784	1720542	759	759	forward	8.2528e-102	1163
1902	271063	269975	3055934	3057031	1089	1098	reverse	1.03535e-101	1162
1903	7974972	7975886	8458462	8459376	915	915	forward	1.03535e-101	1162
1904	1717862	1717500	7027251	7027616	363	366	reverse	1.29888e-101	1161
1905	10524283	10525140	2379217	2380063	858	847	forward	1.29888e-101	1161
1906	4482441	4481603	4981335	4982173	839	839	reverse	1.6295e-101	1160
1907	3012879	3011575	7890348	7891640	1305	1293	reverse	1.6295e-101	1160
1908	2218664	2219849	672003	673189	1186	1187	forward	1.6295e-101	1160
1909	9661563	9660917	2770931	2771579	647	649	reverse	2.04427e-101	1159
1910	10197102	10195883	4404687	4405921	1220	1235	reverse	2.56461e-101	1158
1911	7251297	7250738	9022491	9023050	560	560	reverse	2.56461e-101	1158
1912	3223403	3224044	2995048	2995689	642	642	forward	2.56461e-101	1158
1913	3759778	3761419	10001998	10003657	1642	1660	forward	2.56461e-101	1158
1914	920208	919805	8639703	8640103	404	401	reverse	4.03636e-101	1156
1915	1013179	1014132	3571216	3572097	954	882	forward	4.03636e-101	1156
1916	10365526	10366064	7175301	7175842	539	542	forward	4.03636e-101	1156
1917	8601597	8602174	11691279	11691859	578	581	forward	4.03636e-101	1156
1918	54313	53362	1122315	1123267	952	953	reverse	5.06377e-101	1155
1919	5017913	5017030	2476213	2477096	884	884	reverse	5.06377e-101	1155
1920	8487600	8487250	7027262	7027618	351	357	reverse	5.06377e-101	1155
1921	3250825	3251711	11591323	11592209	887	887	forward	5.06377e-101	1155
1922	8996434	8995713	1049359	1050074	722	716	reverse	6.3527e-101	1154
1923	3381386	3380456	4411684	4412608	931	925	reverse	6.3527e-101	1154
1924	10090536	10090079	3415656	3416112	458	457	reverse	7.96971e-101	1153
1925	5164056	5164924	1273094	1273968	869	875	forward	1.25433e-100	1151
1926	5380379	5381144	5226473	5227238	766	766	forward	1.5736e-100	1150
1927	1717489	1717848	3019652	3020013	360	362	forward	1.97415e-100	1149
1928	3778774	3779604	5930442	5931269	831	828	forward	1.97415e-100	1149
1929	8847497	8846806	6316862	6317553	692	692	reverse	2.47664e-100	1148
1930	9869216	9868535	336449	337124	682	676	reverse	3.10705e-100	1147
1931	7159167	7158760	6182840	6183245	408	406	reverse	3.10705e-100	1147
1932	8770836	8770027	6263391	6264203	810	813	reverse	3.10705e-100	1147
1933	1606249	1607068	9755538	9756351	820	814	forward	3.89791e-100	1146
1934	2289457	2290175	745151	745866	719	716	forward	4.89008e-100	1145
1935	6569466	6568600	4316368	4317234	867	867	reverse	6.1348e-100	1144
1936	3350932	3349965	6655488	6656448	968	961	reverse	6.1348e-100	1144
1937	7859699	7859092	793004	793613	608	610	reverse	7.69634e-100	1143
1938	7225995	7226437	7662923	7663365	443	443	forward	1.2113e-99	1141
1939	9929605	9930178	1489044	1489614	574	571	forward	1.51963e-99	1140
1940	7477647	7477201	2295818	2296255	447	438	reverse	1.90643e-99	1139
1941	7266331	7267389	6221088	6222146	1059	1059	forward	1.90643e-99	1139
1942	153454	152709	10411206	10411951	746	746	reverse	2.39169e-99	1138
1943	6051457	6050634	1157423	1158246	824	824	reverse	3.00047e-99	1137
1944	10184610	10183732	8486486	8487366	879	881	reverse	3.00047e-99	1137
1945	609105	610659	6524897	6526454	1555	1558	forward	3.00047e-99	1137
1946	8434174	8433371	1857297	1858100	804	804	reverse	3.76421e-99	1136
1947	1424051	1423188	5005119	5005982	864	864	reverse	3.76421e-99	1136
1948	9510616	9509739	7277343	7278226	878	884	reverse	3.76421e-99	1136
1949	9818857	9818487	9965478	9965850	371	373	reverse	3.76421e-99	1136
1950	8794841	8795840	6305933	6306932	1000	1000	forward	3.76421e-99	1136
1951	11119185	11118518	7791202	7791869	668	668	reverse	5.92436e-99	1134
1952	7845086	7844182	806487	807391	905	905	reverse	7.43235e-99	1133
1953	10386120	10384986	7308770	7309904	1135	1135	reverse	7.43235e-99	1133
1954	3084504	3085523	6435414	6436436	1020	1023	forward	7.43235e-99	1133
1955	8434174	8433379	1857405	1858200	796	796	reverse	9.32417e-99	1132
1956	3372403	3371723	4420189	4420863	681	675	reverse	9.32417e-99	1132
1957	8433334	8434513	10002502	10003651	1180	1150	forward	9.32417e-99	1132
1958	9346751	9346112	8366427	8367071	640	645	reverse	1.16975e-98	1131
1959	5485832	5486622	845145	845928	791	784	forward	1.16975e-98	1131
1960	9868915	9868163	336750	337496	753	747	reverse	1.4675e-98	1130
1961	2871029	2869775	1028343	1029597	1255	1255	reverse	1.4675e-98	1130
1962	9984072	9984796	6259952	6260677	725	726	forward	1.4675e-98	1130
1963	4425980	4424900	83245	84327	1081	1083	reverse	1.84104e-98	1129
1964	2842943	2842165	957658	958430	779	773	reverse	1.84104e-98	1129
1965	1415420	1414408	5014695	5015711	1013	1017	reverse	2.30965e-98	1128
1966	4966695	4965654	6707102	6708129	1042	1028	reverse	2.89755e-98	1127
1967	7830883	7830296	820422	821009	588	588	reverse	3.63509e-98	1126
1968	1059095	1058503	975550	976142	593	593	reverse	3.63509e-98	1126
1969	628909	628072	1993926	1994753	838	828	reverse	3.63509e-98	1126
1970	10830620	10829746	4812178	4813057	875	880	reverse	3.63509e-98	1126
1971	3087685	3088270	6438607	6439199	586	593	forward	3.63509e-98	1126
1972	7968804	7969981	8104358	8105541	1178	1184	forward	3.63509e-98	1126
1973	2047910	2047072	11472070	11472908	839	839	reverse	4.56036e-98	1125
1974	8423241	8424100	1857025	1857884	860	860	forward	4.56036e-98	1125
1975	1272996	1273809	10303396	10304209	814	814	forward	4.56036e-98	1125
1976	4789853	4789250	8726610	8727218	604	609	reverse	5.72115e-98	1124
1977	9564383	9563684	8873412	8874099	700	688	reverse	5.72115e-98	1124
1978	4099108	4098062	4767940	4768983	1047	1044	reverse	7.17741e-98	1123
1979	10160487	10162037	12176192	12177760	1551	1569	forward	7.17741e-98	1123
1980	10647380	10647010	4093430	4093802	371	373	reverse	9.00434e-98	1122
1981	488639	489276	10615936	10616576	638	641	forward	9.00434e-98	1122
1982	6978674	6979634	5661119	5662079	961	961	forward	1.12963e-97	1121
1983	3082087	3083096	6432988	6433997	1010	1010	forward	1.12963e-97	1121
1984	10365556	10365989	7175373	7175806	434	434	forward	1.41716e-97	1120
1985	8635217	8634875	3722471	3722814	343	344	reverse	1.77789e-97	1119
1986	254001	252744	7948379	7949631	1258	1253	reverse	2.23043e-97	1118
1987	10373759	10373180	7323267	7323849	580	583	reverse	2.79816e-97	1117
1988	2838627	2839203	6813207	6813783	577	577	forward	2.79816e-97	1117
1989	2590514	2591206	9521615	9522310	693	696	forward	2.79816e-97	1117
1990	10191642	10191095	8476222	8476670	548	449	reverse	3.5104e-97	1116
1991	9481557	9482798	7933442	7934677	1242	1236	forward	3.5104e-97	1116
1992	4866375	4867167	8080642	8081434	793	793	forward	3.5104e-97	1116
1993	1225487	1224676	2386461	2387272	812	812	reverse	4.40393e-97	1115
1994	8601600	8602306	11691306	11692012	707	707	forward	4.40393e-97	1115
1995	6899812	6899010	479743	480548	803	806	reverse	5.52491e-97	1114
1996	3233277	3232595	9387067	9387746	683	680	reverse	5.52491e-97	1114
1997	2869625	2870693	1818745	1819810	1069	1066	forward	6.93121e-97	1113
[truncated: 2,925 more rows]

## Sheet: S3
	Positions							Statistics
#	S. japonicus (Sj)		S. cryophilus (Sc)		Sj	Sc	sense	Evalue	score
	Start	Stop	Start	Stop	size	size
1	8918591	8911494	10883848	10890939	7098	7092	reverse	0	17095
2	2283614	2290176	2479790	2486367	6563	6578	forward	0	13197
3	7479255	7485477	1004548	1010779	6223	6232	forward	0	12997
4	5139261	5145673	6394727	6401160	6413	6434	forward	0	12054
5	7364804	7358578	9483357	9489571	6227	6215	reverse	0	11998
6	6400504	6394978	10967661	10973205	5527	5545	reverse	0	11823
7	4520518	4515148	8684957	8690343	5371	5387	reverse	0	11328
8	10365932	10361222	1390351	1395069	4711	4719	reverse	0	10741
9	4660059	4653274	2736585	2743351	6786	6767	reverse	0	10575
10	4803303	4808385	2690439	2695560	5083	5122	forward	0	10569
11	1332397	1339449	2009859	2016918	7053	7060	forward	0	10239
12	7553804	7550103	2586003	2589707	3702	3705	reverse	0	9885
13	272916	268141	9928119	9932893	4776	4775	reverse	0	9730
14	1377442	1374242	897941	901134	3201	3194	reverse	0	9433
15	394695	389949	1037885	1042633	4747	4749	reverse	0	9304
16	2421678	2416566	3399774	3404856	5113	5083	reverse	0	8781
17	3399991	3396676	3695920	3699236	3316	3317	reverse	0	8355
18	6476501	6472309	1697742	1701931	4193	4190	reverse	0	8318
19	9182461	9179741	9513590	9516310	2721	2721	reverse	0	8269
20	10272509	10275254	9513625	9516371	2746	2747	forward	0	8223
21	6731946	6734523	5247258	5249834	2578	2577	forward	0	8183
22	2957607	2963969	505853	512342	6363	6490	forward	0	8144
23	9796769	9794233	5247305	5249841	2537	2537	reverse	0	8142
24	9796772	9794228	4243486	4246030	2545	2545	reverse	0	8061
25	6731963	6734534	4243456	4246029	2572	2574	forward	0	8027
26	5699545	5704226	4129824	4134523	4682	4700	forward	0	8021
27	5682020	5678478	2386961	2390517	3543	3557	reverse	0	7837
28	437682	432485	6598857	6604060	5198	5204	reverse	0	7837
29	3293518	3296992	7180391	7183855	3475	3465	forward	0	7759
30	3024802	3021971	2117792	2120626	2832	2835	reverse	0	7397
31	2487852	2483596	9624456	9628723	4257	4268	reverse	0	7206
32	2130958	2126177	799854	804646	4782	4793	reverse	0	7163
33	3549772	3555880	7984865	7991152	6109	6288	forward	0	7117
34	9627538	9630789	4367082	4370333	3252	3252	forward	0	7104
35	10985649	10988920	8156773	8160038	3272	3266	forward	0	7093
36	4628799	4633668	1489256	1494134	4870	4879	forward	0	6870
37	5208827	5203686	6489051	6494101	5142	5051	reverse	0	6723
38	5613767	5610577	1596395	1599588	3191	3194	reverse	0	6717
39	9483514	9478499	10841249	10846258	5016	5010	reverse	0	6671
40	5222028	5218278	6475122	6478860	3751	3739	reverse	0	6413
41	3329263	3332036	1838144	1840917	2774	2774	forward	0	6404
42	5193307	5195811	6452812	6455321	2505	2510	forward	0	6402
43	691381	695736	3327439	3331638	4356	4200	forward	0	6366
44	7194764	7192079	3277374	3280052	2686	2679	reverse	0	6356
45	4983633	4985557	1831482	1833404	1925	1923	forward	0	6298
46	1287665	1290831	310555	313724	3167	3170	forward	0	6287
47	10263645	10265765	9498130	9500244	2121	2115	forward	0	6242
48	2180532	2183149	836378	838996	2618	2619	forward	0	6199
49	1528983	1532062	2888814	2891840	3080	3027	forward	0	6193
50	9290891	9292853	8747328	8749294	1963	1967	forward	0	6181
51	5875604	5872398	3807004	3810213	3207	3210	reverse	0	6171
52	10683993	10682147	1831486	1833332	1847	1847	reverse	0	6091
53	5704536	5700894	8684960	8688647	3643	3688	reverse	0	6062
54	7477647	7475700	8747329	8749267	1948	1939	reverse	0	6038
55	5706451	5708681	4136731	4138961	2231	2231	forward	0	5954
56	7517040	7520164	433643	436776	3125	3134	forward	0	5946
57	10239263	10236201	4522242	4525325	3063	3084	reverse	0	5927
58	1729924	1733219	6017728	6021015	3296	3288	forward	0	5889
59	9182390	9179727	5476904	5479562	2664	2659	reverse	0	5869
60	10272545	10275197	5476904	5479550	2653	2647	forward	0	5839
61	7053457	7056114	5476895	5479555	2658	2661	forward	0	5828
62	2528524	2531484	3536390	3539359	2961	2970	forward	0	5816
63	8172664	8174098	4807812	4809266	1435	1455	forward	0	5813
64	8164161	8165609	4807803	4809266	1449	1464	forward	0	5805
65	11017852	11012793	458229	463286	5060	5058	reverse	0	5804
66	10690621	10687448	6553502	6556690	3174	3189	reverse	0	5776
67	10942517	10946438	10300421	10304342	3922	3922	forward	0	5765
68	8181161	8182609	4807812	4809266	1449	1455	forward	0	5756
69	9290892	9292881	532225	534207	1990	1983	forward	0	5745
70	6293106	6295984	6358435	6361320	2879	2886	forward	0	5662
71	6287683	6290693	6352439	6355446	3011	3008	forward	0	5623
72	10535278	10538022	389402	392137	2745	2736	forward	0	5619
73	10188767	10186073	3131355	3134046	2695	2692	reverse	0	5611
74	791949	794593	2144423	2147067	2645	2645	forward	0	5600
75	7053434	7056106	9513638	9516309	2673	2672	forward	0	5581
76	7889557	7893222	5295633	5299321	3666	3689	forward	0	5579
77	5498512	5492724	8982113	8987892	5789	5780	reverse	0	5570
78	8178063	8180090	4804100	4806565	2028	2466	forward	0	5545
79	8161550	8163084	4804982	4806565	1535	1584	forward	0	5530
80	7477611	7475688	532240	534160	1924	1921	reverse	0	5506
81	1704641	1701572	10381850	10384922	3070	3073	reverse	0	5493
82	9924061	9919837	9237214	9241387	4225	4174	reverse	0	5482
83	7613324	7616241	1903886	1906800	2918	2915	forward	0	5477
84	8170060	8171578	4804982	4806565	1519	1584	forward	0	5466
85	4512355	4509199	8693762	8696923	3157	3162	reverse	0	5454
86	8557466	8555204	9213328	9215588	2263	2261	reverse	0	5431
87	8189307	8190736	4807790	4809266	1430	1477	forward	0	5408
88	7408655	7405810	5955031	5957879	2846	2849	reverse	0	5400
89	5729465	5735548	6542300	6548355	6084	6056	forward	0	5336
90	423800	421526	6613138	6615430	2275	2293	reverse	0	5323
91	4997506	4995256	741715	743971	2251	2257	reverse	0	5312
92	2519698	2522213	3526581	3529102	2516	2522	forward	0	5299
93	7261402	7258766	7395972	7398608	2637	2637	reverse	0	5264
94	6042874	6039852	6282890	6285918	3023	3029	reverse	0	5261
95	5655551	5658719	2415820	2418988	3169	3169	forward	0	5240
96	8362041	8359109	8112075	8115022	2933	2948	reverse	0	5191
97	3506201	3501244	2020831	2025761	4958	4931	reverse	0	5168
98	10749464	10746872	10192898	10195490	2593	2593	reverse	0	5148
99	8186780	8188275	4804982	4806565	1496	1584	forward	0	5143
100	3749464	3745213	5280826	5284879	4252	4054	reverse	0	5107
101	4516827	4519799	4131167	4134148	2973	2982	forward	0	5097
102	9788101	9784704	4251776	4255191	3398	3416	reverse	0	5070
103	2212917	2210583	2232763	2235115	2335	2353	reverse	0	5065
104	3156610	3154382	6947604	6949832	2229	2229	reverse	0	5062
105	1139702	1142210	5960748	5963254	2509	2507	forward	0	5048
106	6516394	6513658	6565793	6568531	2737	2739	reverse	0	4948
107	7256585	7257954	9327437	9328806	1370	1370	forward	0	4943
108	5822856	5820325	3081615	3084149	2532	2535	reverse	0	4914
109	7850842	7848179	2536432	2539097	2664	2666	reverse	0	4903
110	173811	172421	9327418	9328807	1391	1390	reverse	0	4882
111	8765099	8768552	7359149	7362596	3454	3448	forward	0	4855
112	10160435	10162294	3875758	3877614	1860	1857	forward	0	4839
113	9224237	9221463	7155527	7158286	2775	2760	reverse	0	4827
114	4924106	4926294	3910924	3913136	2189	2213	forward	0	4807
115	1547697	1549814	2908303	2910421	2118	2119	forward	0	4737
116	546696	548957	1754728	1756992	2262	2265	forward	0	4732
117	6379358	6376880	10958213	10960688	2479	2476	reverse	0	4724
118	2667357	2669355	6333714	6335710	1999	1997	forward	0	4719
119	4519797	4516843	9928449	9931394	2955	2946	reverse	0	4701
120	9384159	9386234	5993290	5995364	2076	2075	forward	0	4687
121	3245627	3247400	7160329	7162102	1774	1774	forward	0	4682
122	5704209	5700984	9928089	9931308	3226	3220	reverse	0	4666
123	11168266	11165863	6233454	6235854	2404	2401	reverse	0	4645
124	1395443	1392698	9156750	9159492	2746	2743	reverse	0	4636
125	6329355	6327240	685075	687169	2116	2095	reverse	0	4630
126	7747001	7749047	101099	103145	2047	2047	forward	0	4597
127	8873907	8875967	10075696	10077753	2061	2058	forward	0	4577
128	7383921	7385716	583028	584829	1796	1802	forward	0	4566
129	8382281	8380068	857182	859405	2214	2224	reverse	0	4551
130	10644354	10645727	9327417	9328807	1374	1391	forward	0	4549
131	6830429	6833481	1645643	1648678	3053	3036	forward	0	4539
132	3037506	3035766	2106072	2107812	1741	1741	reverse	0	4532
133	3041823	3039740	2101592	2103675	2084	2084	reverse	0	4525
134	272583	269638	8685695	8688637	2946	2943	reverse	0	4510
135	6620040	6622204	7092041	7094208	2165	2168	forward	0	4505
136	7147179	7149441	5579828	5582090	2263	2263	forward	0	4499
137	2560555	2558895	3571112	3572772	1661	1661	reverse	0	4484
138	10023573	10026682	10293610	10296673	3110	3064	forward	0	4431
139	10833039	10835818	7539915	7542679	2780	2765	forward	0	4395
140	5865173	5866905	7823138	7824870	1733	1733	forward	0	4381
141	8357469	8355831	8116224	8117862	1639	1639	reverse	0	4378
142	10253678	10251494	8365447	8367636	2185	2190	reverse	0	4353
143	1433525	1435800	10586383	10588660	2276	2278	forward	0	4348
144	6297004	6298998	6362651	6364654	1995	2004	forward	0	4333
145	977969	980131	5232953	5235113	2163	2161	forward	0	4331
146	9479083	9482057	8685690	8688664	2975	2975	forward	0	4327
147	5938518	5941179	5785411	5788076	2662	2666	forward	0	4325
148	2447398	2445403	3373178	3375181	1996	2004	reverse	0	4323
149	7319811	7317700	4573900	4576013	2112	2114	reverse	0	4321
150	9614454	9616433	4351335	4353329	1980	1995	forward	0	4312
151	1488251	1489758	9539315	9540813	1508	1499	forward	0	4278
152	935343	937400	5339808	5341865	2058	2058	forward	0	4271
153	7900813	7903462	10343169	10345842	2650	2674	forward	0	4268
154	9942670	9940507	6650439	6652599	2164	2161	reverse	0	4254
155	7668324	7670466	9427430	9429554	2143	2125	forward	0	4247
156	8519895	8521651	5625276	5627032	1757	1757	forward	0	4242
157	5064004	5066147	3930882	3933019	2144	2138	forward	0	4231
158	3949557	3946224	4043145	4046406	3334	3262	reverse	0	4223
159	3112036	3113754	10778643	10780364	1719	1722	forward	0	4209
160	9620077	9622191	4357260	4359422	2115	2163	forward	0	4187
161	6047567	6045755	6277991	6279804	1813	1814	reverse	0	4177
162	9430068	9432083	3063211	3065244	2016	2034	forward	0	4168
163	4794476	4796807	2681373	2683701	2332	2329	forward	0	4153
164	8804681	8803003	7333278	7334956	1679	1679	reverse	0	4149
165	5664881	5661187	2405562	2408924	3695	3363	reverse	0	4140
166	9478989	9481905	9928353	9931263	2917	2911	forward	0	4140
167	8160135	8161236	4801748	4802878	1102	1131	forward	0	4128
168	10279815	10278092	9582032	9583755	1724	1724	reverse	0	4110
169	5584544	5586318	5683360	5685133	1775	1774	forward	0	4106
170	1747898	1745315	1126558	1129125	2584	2568	reverse	0	4103
171	6463350	6461511	1711291	1713131	1840	1841	reverse	0	4102
172	2916679	2914765	3033458	3035373	1915	1916	reverse	0	4092
173	8177148	8178254	4801748	4802878	1107	1131	forward	0	4058
174	9598110	9601777	4308106	4311772	3668	3667	forward	0	4052
175	8545240	8541648	9226042	9229613	3593	3572	reverse	0	4050
176	8318601	8317387	8097874	8099089	1215	1216	reverse	0	4039
177	3884144	3881544	9985583	9988183	2601	2601	reverse	0	4036
178	7325324	7327473	8488603	8490756	2150	2154	forward	0	4035
179	7602769	7600217	3622736	3625287	2553	2552	reverse	0	4017
180	3301203	3302534	7189203	7190535	1332	1333	forward	0	3985
181	875685	874330	7123028	7124383	1356	1356	reverse	0	3981
182	4130866	4133782	7583432	7586360	2917	2929	forward	0	3979
183	8624170	8625732	9632767	9634332	1563	1566	forward	0	3956
184	9705877	9708414	4455214	4457763	2538	2550	forward	0	3949
185	11184998	11183681	7189191	7190511	1318	1321	reverse	0	3931
186	1381847	1379886	9171898	9173859	1962	1962	reverse	0	3918
187	8190179	8191130	4809367	4810322	952	956	forward	0	3912
188	9531658	9533939	1352077	1354358	2282	2282	forward	0	3905
189	5974900	5980111	5822986	5828244	5212	5259	forward	0	3893
190	10477944	10476567	4118188	4119562	1378	1375	reverse	0	3870
191	1003222	1005556	8272519	8274864	2335	2346	forward	0	3869
192	4117848	4115694	7876823	7878980	2155	2158	reverse	0	3861
193	7644434	7642659	1957869	1959644	1776	1776	reverse	0	3849
194	9546932	9545762	10652722	10653892	1171	1171	reverse	0	3847
195	5631328	5630018	1576887	1578197	1311	1311	reverse	0	3844
196	9546931	9545723	3905190	3906399	1209	1210	reverse	0	3839
197	3571816	3573672	8007712	8009568	1857	1857	forward	0	3838
198	8168658	8169747	4801748	4802878	1090	1131	forward	0	3834
199	2009555	2011070	5864291	5865804	1516	1514	forward	0	3833
200	1065872	1064444	6146652	6148080	1429	1429	reverse	0	3817
201	7256900	7257954	5017355	5018409	1055	1055	forward	0	3817
202	173476	172421	5017355	5018410	1056	1056	reverse	0	3812
203	7257954	7256900	7399500	7400554	1055	1055	reverse	0	3802
204	5059687	5063016	3926549	3929867	3330	3319	forward	0	3802
205	7328416	7330019	8498410	8500013	1604	1604	forward	0	3794
206	9313911	9312244	1218479	1220152	1668	1674	reverse	0	3787
207	953161	956311	5358106	5361265	3151	3160	forward	0	3784
208	5871061	5869693	3811240	3812611	1369	1372	reverse	0	3777
209	1645109	1646983	4548944	4550827	1875	1884	forward	0	3772
210	172420	173476	7399498	7400554	1057	1057	forward	0	3771
211	3016131	3013287	2128673	2131497	2845	2825	reverse	0	3769
212	2199030	2197385	2251002	2252658	1646	1657	reverse	0	3766
213	541362	539750	1792476	1794088	1613	1613	reverse	0	3764
214	8173546	8174489	4809367	4810322	944	956	forward	0	3763
215	3290890	3292246	7177308	7178659	1357	1352	forward	0	3763
216	2674140	2675731	5636348	5637933	1592	1586	forward	0	3762
217	7812059	7810233	2574678	2576498	1827	1821	reverse	0	3760
218	988071	989575	8253260	8254762	1505	1503	forward	0	3760
219	8943068	8941272	8013354	8015149	1797	1796	reverse	0	3759
220	9238601	9236651	1557957	1559904	1951	1948	reverse	0	3753
221	8165052	8166001	4809367	4810322	950	956	forward	0	3750
222	3101686	3099670	2053689	2055702	2017	2014	reverse	0	3749
223	10238934	10236873	433885	435943	2062	2059	reverse	0	3748
224	7931969	7930323	7072826	7074465	1647	1640	reverse	0	3742
225	1605265	1603811	7814802	7816256	1455	1455	reverse	0	3704
226	4700929	4702808	2713655	2715449	1880	1795	forward	0	3696
227	4636530	4637728	1496892	1498097	1199	1206	forward	0	3694
228	8548790	8547339	9223598	9225043	1452	1446	reverse	0	3685
229	803732	805901	9691476	9693645	2170	2170	forward	0	3685
230	3983127	3984514	11117045	11118442	1388	1398	forward	0	3685
231	4809859	4808730	1496950	1498079	1130	1130	reverse	0	3649
232	7336119	7334065	5768995	5771020	2055	2026	reverse	0	3649
233	580587	581795	7189203	7190410	1209	1208	forward	0	3639
234	4046407	4048929	7572089	7574617	2523	2529	forward	0	3637
235	10327408	10328733	9060990	9062315	1326	1326	forward	0	3631
236	8413155	8411130	10017726	10019748	2026	2023	reverse	0	3629
237	5364466	5362805	9821762	9823426	1662	1665	reverse	0	3626
238	7608892	7607705	3616144	3617331	1188	1188	reverse	0	3623
239	8344634	8343283	8128706	8130057	1352	1352	reverse	0	3622
240	2807282	2808657	1749173	1750550	1376	1378	forward	0	3620
241	2925163	2921744	3025871	3029253	3420	3383	reverse	0	3619
242	1723729	1721264	4156442	4158898	2466	2457	reverse	0	3615
243	7517027	7519347	4522319	4524648	2321	2330	forward	0	3606
244	55927	52987	4201750	4204717	2941	2968	reverse	0	3603
245	10645737	10644749	7399489	7400477	989	989	reverse	0	3600
246	10644749	10645727	5017432	5018410	979	979	forward	0	3591
247	3393081	3390426	3702358	3704981	2656	2624	reverse	0	3581
248	9502500	9500712	9748866	9750634	1789	1769	reverse	0	3573
249	7941763	7938958	7112702	7115502	2806	2801	reverse	0	3572
250	1581240	1582984	2959183	2960929	1745	1747	forward	0	3569
251	8042247	8044142	8964836	8966725	1896	1890	forward	0	3560
252	8106989	8108629	7551822	7553462	1641	1641	forward	0	3559
253	8720348	8718994	10134214	10135568	1355	1355	reverse	0	3550
254	7240243	7237260	7414479	7417447	2984	2969	reverse	0	3549
255	6704620	6702965	6673523	6675223	1656	1701	reverse	0	3548
256	8003966	8006730	4201832	4204629	2765	2798	forward	0	3548
257	5761199	5759750	4994891	4996346	1450	1456	reverse	0	3542
258	7207608	7205431	3264702	3266883	2178	2182	reverse	0	3528
259	4504121	4502441	11121461	11123147	1681	1687	reverse	0	3522
260	8362889	8364309	8148225	8149651	1421	1427	forward	0	3515
261	8693432	8695129	2185843	2187540	1698	1698	forward	0	3504
262	9481579	9479018	4131640	4134213	2562	2574	reverse	0	3502
263	2239095	2241313	2220865	2223074	2219	2210	forward	0	3502
264	2789035	2791347	6102680	6105016	2313	2337	forward	0	3500
265	8088045	8086471	729764	731343	1575	1580	reverse	0	3497
266	625593	623500	245008	247038	2094	2031	reverse	0	3496
267	7532337	7530382	4910726	4912693	1956	1968	reverse	0	3487
268	7016107	7013457	5411952	5414595	2651	2644	reverse	0	3484
269	2286447	2288942	3696687	3699194	2496	2508	forward	0	3481
270	9522986	9524178	1340705	1341891	1193	1187	forward	0	3480
271	1495772	1493816	9554233	9556187	1957	1955	reverse	0	3471
272	6791342	6789903	10517591	10519042	1440	1452	reverse	0	3453
273	10258940	10257304	4507155	4508792	1637	1638	reverse	0	3452
274	2556413	2558130	3566220	3567930	1718	1711	forward	0	3452
275	270057	272651	10843155	10845740	2595	2586	forward	0	3450
276	593563	595234	8216341	8218013	1672	1673	forward	0	3438
277	5260945	5259857	1340711	1341799	1089	1089	reverse	0	3433
278	606192	602868	1989738	1993163	3325	3426	reverse	0	3427
279	7017739	7015633	5409745	5411851	2107	2107	reverse	0	3418
280	5749370	5750849	4983289	4984768	1480	1480	forward	0	3415
281	10470855	10469069	5103034	5104823	1787	1790	reverse	0	3413
282	891121	889469	4617719	4619371	1653	1653	reverse	0	3411
283	788354	786307	2147919	2149969	2048	2051	reverse	0	3408
284	7695646	7698170	9457904	9460452	2525	2549	forward	0	3398
285	8182049	8182979	4809367	4810322	931	956	forward	0	3392
286	238247	241025	9324296	9327058	2779	2763	forward	0	3374
287	10661163	10663588	9344520	9346945	2426	2426	forward	0	3371
288	3424717	3425945	3742922	3744153	1229	1232	forward	0	3369
289	448005	445269	1665126	1667896	2737	2771	reverse	0	3364
290	296322	294682	9903516	9905156	1641	1641	reverse	0	3363
291	6082615	6081112	2315931	2317435	1504	1505	reverse	0	3356
292	2148951	2146061	781604	784509	2891	2906	reverse	0	3342
293	5759673	5761209	4986913	4988437	1537	1525	forward	0	3341
294	7806387	7805371	7439902	7440923	1017	1022	reverse	0	3335
295	7017739	7015676	5415355	5417418	2064	2064	reverse	0	3333
296	4142624	4144239	4994780	4996390	1616	1611	forward	0	3329
297	68994	70010	7439902	7440923	1017	1022	forward	0	3328
298	4194488	4195538	7439873	7440921	1051	1049	forward	0	3328
299	4386146	4387162	7439902	7440923	1017	1022	forward	0	3328
300	5770759	5768715	67823	69795	2045	1973	reverse	0	3325
301	7988825	7989841	7439902	7440923	1017	1022	forward	0	3322
302	559716	561483	1769022	1770789	1768	1768	forward	0	3321
303	9329130	9330153	7439895	7440923	1024	1029	forward	0	3317
304	10851740	10854180	11070403	11072768	2441	2366	forward	0	3317
305	1768485	1766770	6012670	6014487	1716	1818	reverse	0	3306
306	9693328	9695274	4442034	4443986	1947	1953	forward	0	3306
307	915597	919140	5317053	5320581	3544	3529	forward	0	3303
308	3142927	3144657	2869767	2871493	1731	1727	forward	0	3301
309	9330627	9331631	7439895	7440899	1005	1005	forward	0	3298
310	8501021	8502180	3217634	3218793	1160	1160	forward	0	3284
311	9275861	9277611	10473098	10474850	1751	1753	forward	0	3281
312	2068272	2069630	7629140	7630498	1359	1359	forward	0	3278
313	6064196	6065898	2306030	2307732	1703	1703	forward	0	3266
314	4142657	4144216	7594840	7596398	1560	1559	forward	0	3266
315	6951355	6953501	8515010	8517162	2147	2153	forward	0	3261
316	8744425	8745665	8560697	8561934	1241	1238	forward	0	3261
317	9355220	9356573	6673521	6674880	1354	1360	forward	0	3259
318	3974943	3977449	11106881	11109390	2507	2510	forward	0	3258
319	5090027	5091532	3959177	3960688	1506	1512	forward	0	3256
320	8012201	8013692	4994848	4996345	1492	1498	forward	0	3250
321	3097444	3095527	2059400	2061317	1918	1918	reverse	0	3249
322	5029688	5026909	7509417	7512196	2780	2780	reverse	0	3249
323	8664793	8668484	2156983	2160599	3692	3617	forward	0	3242
324	5155513	5157262	6411551	6413199	1750	1649	forward	0	3240
325	5508818	5505972	8971706	8974596	2847	2891	reverse	0	3239
326	8042376	8044118	8112682	8114424	1743	1743	forward	0	3232
327	7181783	7180667	3292669	3293783	1117	1115	reverse	0	3222
328	3198679	3196767	10220692	10222591	1913	1900	reverse	0	3222
329	10683927	10682170	8747508	8749256	1758	1749	reverse	0	3221
330	874464	875659	10517832	10519027	1196	1196	forward	0	3221
331	7819101	7817484	2568477	2570091	1618	1615	reverse	0	3218
332	1096186	1097149	10652710	10653669	964	960	forward	0	3218
333	1096178	1097149	3905164	3906136	972	973	forward	0	3211
334	7352919	7350595	5751299	5753608	2325	2310	reverse	0	3210
335	9170569	9171673	3292677	3293781	1105	1105	forward	0	3208
336	7823207	7821397	2564746	2566568	1811	1823	reverse	0	3201
337	189172	186787	9376561	9378997	2386	2437	reverse	0	3200
338	4983703	4985460	8747508	8749256	1758	1749	forward	0	3194
339	9334078	9332397	83830	85502	1682	1673	reverse	0	3193
340	8952791	8951621	8900379	8901549	1171	1171	reverse	0	3187
341	10016117	10017296	10285313	10286491	1180	1179	forward	0	3180
342	155629	152709	5037625	5040542	2921	2918	reverse	0	3177
343	2398547	2396606	3426087	3428031	1942	1945	reverse	0	3174
344	5750812	5749271	4994915	4996459	1542	1545	reverse	0	3173
345	7015967	7013457	5418159	5420663	2511	2505	reverse	0	3167
346	6854521	6853077	10640636	10642076	1445	1441	reverse	0	3159
347	3238235	3239533	3462818	3464116	1299	1299	forward	0	3153
348	7181777	7180681	4653889	4654985	1097	1097	reverse	0	3146
349	7344597	7342706	5760032	5761896	1892	1865	reverse	0	3145
350	5701322	5703557	10843154	10845383	2236	2230	forward	0	3145
351	9330140	9329085	86583	87638	1056	1056	reverse	0	3140
352	4517926	4520482	10843828	10846315	2557	2488	forward	0	3131
353	2942953	2941189	3007563	3009336	1765	1774	reverse	0	3129
354	4053239	4054861	7565128	7566747	1623	1620	forward	0	3129
355	2371457	2369299	1429916	1432083	2159	2168	reverse	1.92434e-294	3123
356	9331632	9330582	86588	87638	1051	1051	reverse	2.41337e-294	3122
357	4891361	4890270	8804527	8805618	1092	1092	reverse	4.76052e-294	3119
358	6789918	6791110	7123054	7124246	1193	1193	forward	1.47697e-293	3114
359	4387149	4386095	86583	87637	1055	1055	reverse	2.32305e-293	3112
360	69997	68943	86583	87637	1055	1055	reverse	2.32305e-293	3112
361	10573704	10575225	8717625	8719146	1522	1522	forward	2.91341e-293	3111
362	608188	606755	1987631	1989064	1434	1434	reverse	4.58236e-293	3109
363	8080981	8082757	7602707	7604481	1777	1775	forward	7.20735e-293	3107
364	455826	457517	9179242	9180936	1692	1695	forward	1.13361e-292	3105
365	9939605	9937466	6653202	6655334	2140	2133	reverse	1.78299e-292	3103
366	8361450	8359702	8964955	8966700	1749	1746	reverse	2.23611e-292	3102
367	9688256	9690058	4434990	4436805	1803	1816	forward	6.93762e-292	3097
368	5012286	5013741	11057702	11059164	1456	1463	forward	1.36849e-291	3094
369	6594522	6595700	9400994	9402175	1179	1182	forward	2.15242e-291	3092
370	3353920	3352429	736768	738252	1492	1485	reverse	3.38543e-291	3090
371	6924860	6923076	6327695	6329480	1785	1786	reverse	4.24578e-291	3089
372	10813167	10815373	4963915	4966126	2207	2212	forward	5.32477e-291	3088
373	9489493	9487371	10833919	10836047	2123	2129	reverse	1.65203e-290	3083
374	9291130	9292815	1831620	1833308	1686	1689	forward	1.65203e-290	3083
375	8013694	8012210	4986977	4988461	1485	1485	reverse	4.08688e-290	3079
376	781913	779444	9680745	9683206	2470	2462	reverse	4.08688e-290	3079
377	1110681	1112714	5063136	5065216	2034	2081	forward	5.12549e-290	3078
378	1440273	1441867	10591862	10593453	1595	1592	forward	1.26797e-289	3074
379	4144195	4142768	4986976	4988403	1428	1428	reverse	3.13677e-289	3070
380	7805384	7806417	86583	87616	1034	1034	forward	3.13677e-289	3070
381	9170570	9171661	4653894	4654985	1092	1092	forward	3.13677e-289	3070
382	5915540	5916867	9022073	9023403	1328	1331	forward	3.13677e-289	3070
383	5867715	5868861	7826872	7828018	1147	1147	forward	3.93393e-289	3069
384	6743881	6745466	5260831	5262407	1586	1577	forward	1.53069e-288	3063
385	5761286	5759714	7594840	7596411	1573	1572	reverse	2.40754e-288	3061
386	4837578	4836439	2639543	2640682	1140	1140	reverse	7.46949e-288	3056
387	4195525	4194508	86582	87599	1018	1018	reverse	1.17484e-287	3054
388	922026	923931	5324680	5326627	1906	1948	forward	1.84784e-287	3052
389	7989828	7988795	86583	87616	1034	1034	reverse	2.90638e-287	3050
390	5790660	5793371	4012430	4014973	2712	2544	forward	3.64498e-287	3049
391	2667351	2669234	8747375	8749255	1884	1881	forward	3.64498e-287	3049
392	10147456	10148612	3862133	3863293	1157	1161	forward	4.57129e-287	3048
393	3848101	3846434	6529276	6530943	1668	1668	reverse	1.41826e-286	3043
394	39105	40919	7004412	7006226	1815	1815	forward	1.36518e-285	3033
395	413115	415436	7778021	7780294	2322	2274	forward	1.04781e-284	3024
396	2142138	2139202	789208	792156	2937	2949	reverse	2.06686e-284	3021
397	4024772	4026700	7934275	7936215	1929	1941	forward	4.07701e-284	3018
398	5254398	5253338	9122586	9123643	1061	1058	reverse	2.49511e-283	3010
399	9733339	9732282	9122589	9123643	1058	1055	reverse	4.92175e-283	3007
400	7477330	7475712	1831687	1833308	1619	1622	reverse	9.70844e-283	3004
401	7722831	7724184	1137297	1138650	1354	1354	forward	1.91505e-282	3001
402	4590519	4591834	1453255	1454570	1316	1316	forward	4.73755e-282	2997
403	469110	470456	5188623	5189966	1347	1344	forward	7.45145e-282	2995
404	8946256	8944004	220145	222348	2253	2204	reverse	1.84338e-281	2991
405	8702775	8701372	10379266	10380666	1404	1401	reverse	3.63617e-281	2988
406	2749324	2750585	2612019	2613275	1262	1257	forward	4.56024e-281	2987
407	6345920	6344578	666526	667936	1343	1411	reverse	1.12814e-280	2983
408	2031152	2029699	5902234	5903687	1454	1454	reverse	2.22532e-280	2980
409	5362369	5361198	3862131	3863293	1172	1163	reverse	4.38957e-280	2977
410	7447079	7445379	10724016	10725719	1701	1704	reverse	1.08592e-279	2973
411	1323399	1324837	2002109	2003541	1439	1433	forward	1.08592e-279	2973
412	9960947	9963198	2323633	2325860	2252	2228	forward	8.33464e-279	2964
413	6603657	6601345	10356184	10358440	2313	2257	reverse	1.26185e-277	2952
414	2582520	2584142	3587200	3588825	1623	1626	forward	1.9847e-277	2950
415	10399846	10396627	10823488	10826708	3220	3221	reverse	7.72246e-277	2944
416	4188888	4190625	7434196	7435982	1738	1787	forward	7.72246e-277	2944
417	286413	284102	9913542	9915844	2312	2303	reverse	9.68499e-277	2943
418	10873968	10872799	7904393	7905562	1170	1170	reverse	1.91042e-276	2940
419	5759749	5761175	4983305	4984731	1427	1427	forward	2.39592e-276	2939
420	2454453	2452983	3366283	3367753	1471	1471	reverse	3.76842e-276	2937
421	5749357	5750812	4986947	4988403	1456	1457	forward	4.7261e-276	2936
422	1661659	1662778	10398577	10399695	1120	1119	forward	4.7261e-276	2936
423	5041184	5042546	1150994	1152358	1363	1365	forward	5.92716e-276	2935
424	7924512	7922714	7080527	7082353	1799	1827	reverse	7.43344e-276	2934
425	8225384	8223908	21316	22801	1477	1486	reverse	9.32252e-276	2933
426	6727706	6730093	5243372	5245762	2388	2391	forward	1.46629e-275	2931
427	8904983	8903694	10896193	10897479	1290	1287	reverse	3.49163e-274	2917
428	5999033	6000781	5836764	5838515	1749	1752	forward	5.49181e-274	2915
429	8112511	8110994	7557784	7559304	1518	1521	reverse	6.88745e-274	2914
430	2945746	2944226	3004925	3006442	1521	1518	reverse	1.70385e-273	2910
431	1750265	1748378	1124175	1126059	1888	1885	reverse	5.28627e-273	2905
432	2952469	2950035	2990893	2993277	2435	2385	reverse	5.28627e-273	2905
433	9837256	9838603	10712768	10714115	1348	1348	forward	6.62969e-273	2904
434	3181125	3179841	6915210	6916506	1285	1297	reverse	4.05733e-272	2896
435	7257390	7256567	7400655	7401481	824	827	reverse	8.00333e-272	2893
436	6529466	6531007	1079801	1081294	1542	1494	forward	1.57871e-271	2890
437	1301394	1299902	324572	326064	1493	1493	reverse	3.90548e-271	2886
438	1411010	1409361	8848652	8850327	1650	1676	reverse	4.898e-271	2885
439	9986786	9988039	10252104	10253357	1254	1254	forward	4.898e-271	2885
440	5750815	5749302	7594948	7596453	1514	1506	reverse	2.99755e-270	2877
441	5965575	5967959	5811858	5814239	2385	2382	forward	3.75932e-270	2876
442	7786410	7787806	455976	457372	1397	1397	forward	1.46275e-269	2870
443	7857966	7856522	2530037	2531467	1445	1431	reverse	1.83448e-269	2869
444	2762636	2764127	6075128	6076619	1492	1492	forward	1.83448e-269	2869
445	5453235	5454560	1412141	1413466	1326	1326	forward	1.12269e-268	2861
446	8829395	8831199	7311516	7313328	1805	1813	forward	2.21458e-268	2858
447	2464410	2466710	6871195	6873483	2301	2289	forward	5.47854e-268	2854
448	10771536	10772902	560662	562021	1367	1360	forward	8.61691e-268	2852
449	2128230	2130951	1126269	1128999	2722	2731	forward	1.08068e-267	2851
450	2667417	2669232	532322	534137	1816	1816	forward	1.35531e-267	2850
451	5857629	5854644	7793960	7796897	2986	2938	reverse	2.1317e-267	2848
452	6390526	6389176	10944690	10946028	1351	1339	reverse	1.30459e-266	2840
453	9258708	9257094	1534899	1536513	1615	1615	reverse	2.05192e-266	2838
454	7486599	7488689	1015992	1018083	2091	2092	forward	2.05192e-266	2838
455	5429598	5428395	9837842	9839045	1204	1204	reverse	3.22735e-266	2836
456	4679520	4681423	9725455	9727367	1904	1913	forward	1.97512e-265	2828
457	3785457	3783971	4473941	4475427	1487	1487	reverse	3.89605e-265	2825
458	4144217	4142749	4983282	4984750	1469	1469	reverse	3.89605e-265	2825
459	9455219	9457817	10803132	10805718	2599	2587	forward	4.88616e-265	2824
460	869030	867559	933067	934528	1472	1462	reverse	6.12789e-265	2823
461	172986	173808	7400655	7401480	823	826	forward	9.63825e-265	2821
462	1217445	1218567	3319365	3320487	1123	1123	forward	1.51595e-264	2819
463	5949253	5951721	5794871	5797347	2469	2477	forward	1.51595e-264	2819
464	8456216	8454972	1317912	1319159	1245	1248	reverse	1.9012e-264	2818
465	9904812	9902696	10731376	10733495	2117	2120	reverse	1.9012e-264	2818
466	6838811	6840132	1286586	1287911	1322	1326	forward	1.9012e-264	2818
467	8407935	8406502	3881104	3882527	1434	1424	reverse	7.39757e-264	2812
468	1195431	1192634	5613371	5616165	2798	2795	reverse	7.39757e-264	2812
469	8012267	8013694	7594950	7596377	1428	1428	forward	1.83005e-263	2808
470	10683927	10682172	532392	534138	1756	1747	reverse	4.52727e-263	2804
471	1097150	1098013	3905505	3906368	864	864	forward	4.52727e-263	2804
472	9946550	9944976	6646490	6648073	1575	1584	reverse	5.6778e-263	2803
473	8185619	8186479	4801966	4802878	861	913	forward	1.11998e-262	2800
474	5075085	5072968	3948340	3950443	2118	2104	reverse	1.4046e-262	2799
475	1097141	1098025	10653030	10653914	885	885	forward	3.47478e-262	2795
476	8530370	8528623	9209251	9210997	1748	1747	reverse	4.35784e-262	2794
477	7275686	7274576	8554842	8555952	1111	1111	reverse	5.4653e-262	2793
478	7029818	7031715	154012	155909	1898	1898	forward	1.07806e-261	2790
479	652811	651426	2367075	2368457	1386	1383	reverse	1.69563e-261	2788
480	224804	226999	9310880	9313075	2196	2196	forward	1.69563e-261	2788
481	4713434	4714771	2723638	2724975	1338	1338	forward	3.34474e-261	2785
482	4983703	4985458	532392	534138	1756	1747	forward	8.27438e-261	2781
483	9444365	9445733	10789845	10791176	1369	1332	forward	1.03772e-260	2780
484	5224468	5222520	6472624	6474572	1949	1949	reverse	1.63217e-260	2778
485	8695136	8693657	9427409	9428883	1480	1475	reverse	2.04696e-260	2777
486	5994017	5992628	9084138	9085530	1390	1393	reverse	2.56716e-260	2776
487	10188595	10186691	4136877	4138766	1905	1890	reverse	4.87436e-259	2763
488	7305280	7303652	4585847	4587487	1629	1641	reverse	1.20584e-258	2759
489	6624854	6623473	7068067	7069448	1382	1382	reverse	2.3786e-258	2756
490	7456914	7456007	5915802	5916711	908	910	reverse	5.8843e-258	2752
491	5759669	5761295	11151133	11152765	1627	1633	forward	9.25512e-258	2750
492	8013695	8012267	4983304	4984732	1429	1429	reverse	1.16071e-257	2749
493	2443795	2442645	3376863	3378013	1151	1151	reverse	1.45569e-257	2748
494	2457463	2455676	3363524	3365307	1788	1784	reverse	2.87144e-257	2745
495	7950877	7949346	7103514	7105042	1532	1529	reverse	2.87144e-257	2745
496	2314398	2311699	564881	567570	2700	2690	reverse	7.10351e-257	2741
497	7669766	7668326	2186076	2187522	1441	1447	reverse	1.7573e-256	2737
498	7107721	7109366	2135860	2137499	1646	1640	forward	1.34877e-255	2728
499	3432036	3433194	3749580	3750738	1159	1159	forward	1.69153e-255	2727
500	3513506	3514699	6719195	6720388	1194	1194	forward	1.69153e-255	2727
501	3405695	3404594	3690086	3691184	1102	1099	reverse	3.33665e-255	2724
502	8029376	8028128	8951712	8952960	1249	1249	reverse	5.24805e-255	2722
503	3346432	3347652	1855648	1856898	1221	1251	forward	1.03521e-254	2719
504	3903761	3905913	9971402	9973554	2153	2153	forward	1.62823e-254	2717
505	7375304	7372994	5692715	5695022	2311	2308	reverse	2.56096e-254	2715
506	4964283	4966270	1809824	1811869	1988	2046	forward	2.56096e-254	2715
507	7456905	7456020	7653156	7654044	886	889	reverse	3.21178e-254	2714
508	3792943	3794031	4470062	4471153	1089	1092	forward	4.028e-254	2713
509	2507613	2508769	3511984	3513140	1157	1157	forward	7.94547e-254	2710
510	4426293	4424836	4986978	4988437	1458	1460	reverse	4.86258e-253	2702
511	9291086	9292812	6333865	6335585	1727	1721	forward	4.86258e-253	2702
512	6638142	6635950	7057197	7059401	2193	2205	reverse	9.59173e-253	2699
513	11093613	11092142	7228794	7230265	1472	1472	reverse	1.50863e-252	2697
514	3379718	3381394	766987	768660	1677	1674	forward	2.97587e-252	2694
515	8234487	8236442	8043780	8045751	1956	1972	forward	3.73214e-252	2693
516	4409920	4407818	8460802	8462891	2103	2090	reverse	5.87009e-252	2691
517	5442391	5444058	9803236	9804901	1668	1666	forward	5.87009e-252	2691
518	6655284	6653889	8825755	8827149	1396	1395	reverse	9.23276e-252	2689
519	705856	706945	627706	628795	1090	1090	forward	1.45217e-251	2687
520	4161884	4160717	7743471	7744638	1168	1168	reverse	1.82122e-251	2686
521	6038238	6036848	6287454	6288844	1391	1391	reverse	3.59246e-251	2683
522	2460205	2458426	3360918	3362700	1780	1783	reverse	5.6504e-251	2681
523	7042003	7042965	5464857	5465819	963	963	forward	2.75729e-250	2674
524	10965736	10964599	8190510	8191647	1138	1138	reverse	6.82114e-250	2670
525	938595	940140	5342950	5344553	1546	1604	forward	8.55461e-250	2669
526	4974862	4976382	1822280	1823800	1521	1521	forward	1.07286e-249	2668
527	8225358	8223861	38572	40075	1498	1504	reverse	1.29515e-248	2657
528	8100654	8102212	7544898	7546453	1559	1556	forward	1.62429e-248	2656
529	5472846	5471669	1195156	1196357	1178	1202	reverse	5.03944e-248	2651
530	1053691	1052638	10366223	10367277	1054	1055	reverse	7.92627e-248	2649
531	736772	738268	10998991	11000487	1497	1497	forward	2.45916e-247	2644
532	269928	272089	4131479	4133649	2162	2171	forward	3.08411e-247	2643
533	526232	524568	7525605	7527277	1665	1673	reverse	3.86788e-247	2642
534	7477551	7475715	6333752	6335585	1837	1834	reverse	1.20002e-246	2637
535	7298376	7297100	8875777	8877053	1277	1277	reverse	1.20002e-246	2637
536	5830595	5829225	2845648	2847018	1371	1371	reverse	2.96868e-246	2633
537	3488178	3486726	2038215	2039664	1453	1450	reverse	4.66929e-246	2631
538	3744225	3742581	5286280	5287924	1645	1645	reverse	4.66929e-246	2631
539	4464112	4462839	8580855	8582128	1274	1274	reverse	2.27853e-245	2624
540	7204241	7202811	1127608	1129031	1431	1424	reverse	8.86575e-245	2618
541	3256027	3254512	3474526	3476041	1516	1516	reverse	4.32633e-244	2611
542	11154958	11153221	6243085	6244828	1738	1744	reverse	4.32633e-244	2611
543	11124281	11123026	7194855	7196110	1256	1256	reverse	1.07027e-243	2607
544	9268627	9269971	10465785	10467120	1345	1336	forward	1.68337e-243	2605
545	363319	362267	1072687	1073734	1053	1048	reverse	2.11117e-243	2604
546	8954531	8953716	8897686	8898509	816	824	reverse	4.16441e-243	2601
547	7689924	7691188	9449345	9450609	1265	1265	forward	4.16441e-243	2601
548	8646866	8645287	9669309	9670888	1580	1580	reverse	8.21455e-243	2598
549	4738319	4736631	2777498	2779183	1689	1686	reverse	1.03021e-242	2597
550	2028830	2027149	5904619	5906288	1682	1670	reverse	1.55973e-241	2585
551	7795456	7797426	3120477	3122447	1971	1971	forward	1.55973e-241	2585
552	8033195	8032296	8946781	8947680	900	900	reverse	1.9561e-241	2584
553	467718	468480	9765732	9766494	763	763	forward	7.61119e-241	2578
554	4655108	4659594	2011733	2016215	4487	4483	forward	1.50135e-240	2575
555	7916333	7917091	10347169	10347927	759	759	forward	3.71413e-240	2571
556	2452194	2450352	3368301	3370149	1843	1849	reverse	4.65801e-240	2570
557	10319699	10320996	9053521	9054818	1298	1298	forward	3.57512e-239	2561
558	8349027	8347713	8125648	8126962	1315	1315	reverse	4.48368e-239	2560
559	2413279	2411908	3409353	3410781	1372	1429	reverse	7.05215e-239	2558
560	9726885	9727899	10671871	10672879	1015	1009	forward	7.05215e-239	2558
561	5921918	5923725	9028512	9030314	1808	1803	forward	8.84433e-239	2557
562	6940019	6941830	8504450	8506257	1812	1808	forward	2.18796e-238	2553
563	2126203	2128014	3264699	3266551	1812	1853	forward	4.31588e-238	2550
564	8725074	8723370	10130176	10131869	1705	1694	reverse	8.51332e-238	2547
565	4588145	4587406	1020898	1021637	740	740	reverse	1.06768e-237	2546
566	3228231	3226267	67847	69753	1965	1907	reverse	1.33902e-237	2545
567	4406803	4405264	8463486	8465028	1540	1543	reverse	5.21011e-237	2539
568	1726064	1724453	4153913	4155524	1612	1612	reverse	8.19471e-237	2537
569	4179169	4178407	9765731	9766493	763	763	reverse	8.19471e-237	2537
570	2329156	2328077	2834059	2835139	1080	1081	reverse	5.01512e-236	2529
571	3872196	3870914	9995165	9996444	1283	1280	reverse	6.28962e-236	2528
572	6431957	6430304	10923514	10925181	1654	1668	reverse	7.88802e-236	2527
573	3223163	3222092	4187883	4188954	1072	1072	reverse	6.05423e-235	2518
574	3667562	3666679	4557567	4558450	884	884	reverse	6.05423e-235	2518
575	4135622	4136940	7587646	7588965	1319	1320	forward	6.05423e-235	2518
576	5377561	5378940	8222001	8223379	1380	1379	forward	6.05423e-235	2518
577	8399590	8398422	2507022	2508190	1169	1169	reverse	9.52238e-235	2516
578	2768629	2769469	6081639	6082485	841	847	forward	9.52238e-235	2516
579	4144238	4142768	11151170	11152648	1471	1479	reverse	3.70515e-234	2510
580	5646915	5645771	2420428	2421565	1145	1138	reverse	4.64675e-234	2509
581	10674154	10675487	9357279	9358603	1334	1325	forward	9.166e-234	2506
582	310460	313575	1256118	1259227	3116	3110	forward	2.26753e-233	2502
583	5157939	5159844	6414084	6416079	1906	1996	forward	2.26753e-233	2502
584	6915857	6915065	6029781	6030573	793	793	reverse	3.56649e-233	2500
585	512066	513127	7475175	7476236	1062	1062	forward	3.56649e-233	2500
586	9858249	9857241	6767515	6768523	1009	1009	reverse	7.03511e-233	2497
587	2650895	2649407	3846463	3847950	1489	1488	reverse	1.10652e-232	2495
588	9195833	9197140	7149355	7150659	1308	1305	forward	2.18267e-232	2492
589	8560776	8559982	6029777	6030571	795	795	reverse	4.30545e-232	2489
590	4587414	4588137	10347170	10347893	724	724	forward	1.0651e-231	2485
591	8013672	8012164	11151238	11152752	1509	1515	reverse	1.67525e-231	2483
592	8559969	8560778	1088475	1089286	810	812	forward	1.67525e-231	2483
593	8488010	8489068	1522554	1523612	1059	1059	forward	1.67525e-231	2483
594	2070694	2072731	7631390	7633379	2038	1990	forward	1.67525e-231	2483
595	11081604	11080188	7244617	7246033	1417	1417	reverse	8.17491e-231	2476
596	11060748	11059803	7258901	7259843	946	943	reverse	1.61255e-230	2473
597	3440751	3442333	3755907	3757426	1583	1520	forward	1.61255e-230	2473
598	279853	277293	9920908	9923427	2561	2520	reverse	2.02235e-230	2472
599	3323114	3321656	1895202	1896628	1459	1427	reverse	5.003e-230	2468
600	2425766	2423988	3395572	3397350	1779	1779	reverse	6.27443e-230	2467
601	9186544	9185307	7002547	7003823	1238	1277	reverse	6.27443e-230	2467
602	6915062	6915857	1088485	1089280	796	796	forward	9.86872e-230	2465
603	9294635	9293704	8759669	8760598	932	930	reverse	1.94666e-229	2462
604	1024675	1023525	10159405	10160555	1151	1151	reverse	1.94666e-229	2462
605	5128452	5129678	6380469	6381695	1227	1227	forward	1.87381e-228	2452
606	8238253	8238979	8047600	8048320	727	721	forward	3.6962e-228	2449
607	7948674	7947613	7105726	7106788	1062	1063	reverse	3.55787e-227	2439
608	8559982	8560775	1376980	1377773	794	794	forward	1.10384e-226	2434
609	6350275	6348698	661786	663369	1578	1584	reverse	1.73618e-226	2432
610	7093978	7095408	5525419	5526846	1431	1428	forward	1.73618e-226	2432
611	4179187	4178483	9194581	9195287	705	707	reverse	2.1774e-226	2431
612	4770562	4771861	2660020	2661324	1300	1305	forward	2.1774e-226	2431
613	1746820	1745385	3268103	3269541	1436	1439	reverse	6.75546e-226	2426
614	9995360	9997475	10258567	10260676	2116	2110	forward	1.33255e-225	2423
615	6382272	6380909	10953766	10955128	1364	1363	reverse	4.1343e-225	2418
616	4767657	4768487	2657225	2658055	831	831	forward	6.50263e-225	2416
617	166529	164947	5025382	5026960	1583	1579	reverse	1.28268e-224	2413
618	640790	642098	2351542	2352853	1309	1312	forward	1.28268e-224	2413
619	7917125	7916312	1020837	1021647	814	811	reverse	1.60865e-224	2412
620	1339449	1337570	2736347	2738226	1880	1880	reverse	2.01747e-224	2411
621	6915065	6915869	1376978	1377783	805	806	forward	3.17317e-224	2409
622	7787781	7786572	4118192	4119401	1210	1210	reverse	4.99091e-224	2407
623	7769670	7771724	129279	131336	2055	2058	forward	4.99091e-224	2407
624	7422428	7421106	5939458	5940783	1323	1326	reverse	6.25927e-224	2406
625	10010171	10011453	10278798	10280080	1283	1283	forward	3.83064e-223	2398
626	6605843	6606895	1229114	1230166	1053	1053	forward	1.4905e-222	2392
627	5211303	5209661	6486757	6488380	1643	1624	reverse	2.9401e-222	2389
628	2326175	2324699	4877777	4879253	1477	1477	reverse	3.68727e-222	2388
629	8924339	8922961	10875719	10877094	1379	1376	reverse	4.62433e-222	2387
630	8450220	8448692	1324033	1325558	1529	1526	reverse	5.79952e-222	2386
631	2230102	2231643	2210520	2212052	1542	1533	forward	5.79952e-222	2386
632	8740219	8741223	9258568	9259565	1005	998	forward	9.12177e-222	2384
633	7038270	7039469	5459794	5460993	1200	1200	forward	1.14399e-221	2383
634	2011473	2012827	5866368	5867722	1355	1355	forward	1.43472e-221	2382
635	6895545	6894075	6891132	6892601	1471	1470	reverse	1.79932e-221	2381
636	4649024	4648040	2747623	2748607	985	985	reverse	2.25659e-221	2380
637	9826545	9828080	10700700	10702275	1536	1576	forward	3.54927e-221	2378
638	900371	901140	6081636	6082408	770	773	forward	4.45126e-221	2377
639	2713996	2714969	5133531	5134502	974	972	forward	7.00116e-221	2375
640	7256585	7257231	5016608	5017254	647	647	forward	1.10118e-220	2373
641	1745442	1746814	799862	801225	1373	1364	forward	4.28467e-220	2367
642	9899721	9898723	10736907	10737966	999	1060	reverse	6.73914e-220	2365
643	8614630	8616181	9620534	9622079	1552	1546	forward	8.45177e-220	2364
644	4977025	4979158	1824437	1826561	2134	2125	forward	1.66716e-219	2361
645	8995700	8996592	9872371	9873263	893	893	forward	5.17244e-219	2356
646	1048015	1046190	10141992	10143838	1826	1847	reverse	8.13546e-219	2354
647	6490269	6488880	4481713	4483112	1390	1400	reverse	1.02029e-218	2353
648	2883907	2882232	6186615	6188299	1676	1685	reverse	1.02029e-218	2353
649	2158379	2157077	9112768	9114075	1303	1308	reverse	1.27958e-218	2352
650	5749391	5750812	11151221	11152648	1422	1428	forward	1.27958e-218	2352
651	6705537	6706641	6660199	6661316	1105	1118	forward	1.60477e-218	2351
652	1265166	1263920	351831	353080	1247	1250	reverse	2.01259e-218	2350
653	467639	468405	9194520	9195289	767	770	forward	2.01259e-218	2350
654	10476592	10477964	455999	457373	1373	1375	forward	3.96996e-218	2347
655	1237149	1236240	383377	384295	910	919	reverse	6.24414e-218	2345
656	10065632	10064904	5915806	5916537	729	732	reverse	2.33866e-216	2329
657	5987460	5989266	6268088	6269897	1807	1810	forward	2.33866e-216	2329
658	7452500	7451077	4994915	4996339	1424	1425	reverse	3.67836e-216	2327
659	10065645	10064904	7653138	7653883	742	746	reverse	3.67836e-216	2327
660	2641165	2639658	6824553	6826060	1508	1508	reverse	5.78551e-216	2325
661	8888935	8890388	10899699	10901152	1454	1454	forward	7.2558e-216	2324
662	173791	173145	5016608	5017254	647	647	reverse	1.43125e-215	2321
663	1501302	1500377	8615596	8616531	926	936	reverse	1.43125e-215	2321
664	4426312	4424856	11151197	11152662	1457	1466	reverse	4.44051e-215	2316
665	5549184	5550528	1612831	1614191	1345	1361	forward	4.44051e-215	2316
666	1744276	1743011	1130122	1131390	1266	1269	reverse	8.75917e-215	2313
667	4494892	4493577	7691647	7692968	1316	1322	reverse	8.75917e-215	2313
668	3162119	3161245	6939764	6940633	875	870	reverse	1.09852e-214	2312
669	9263405	9264596	10460041	10461232	1192	1192	forward	1.09852e-214	2312
670	1446467	1447522	10599168	10600223	1056	1056	forward	1.7278e-214	2310
671	5850681	5849662	7801465	7802480	1020	1016	reverse	2.71757e-214	2308
672	7833774	7832188	2553261	2554835	1587	1575	reverse	3.40819e-214	2307
673	7202845	7204247	799863	801253	1403	1391	forward	4.27432e-214	2306
674	4139935	4142021	7592170	7594218	2087	2049	forward	1.0574e-213	2302
675	9244575	9243307	1552227	1553489	1269	1263	reverse	1.66313e-213	2300
676	8448679	8450221	3128630	3130169	1543	1540	forward	6.47125e-213	2294
677	9343799	9342664	74187	75306	1136	1120	reverse	8.1158e-213	2293
678	2270360	2272020	2466584	2468249	1661	1666	forward	8.1158e-213	2293
679	6534203	6535653	4994893	4996343	1451	1451	forward	8.1158e-213	2293
680	10664841	10665950	9347932	9349041	1110	1110	forward	1.01783e-212	2292
681	2321901	2320367	4881991	4883525	1535	1535	reverse	1.27649e-212	2291
682	2667683	2669250	1831748	1833324	1568	1577	forward	1.27649e-212	2291
683	8613800	8612560	9097877	9099123	1241	1247	reverse	2.00773e-212	2289
684	7656486	7657720	1942127	1943361	1235	1235	forward	2.00773e-212	2289
685	4825672	4824308	2654171	2655544	1365	1374	reverse	3.96037e-212	2286
686	4424848	4426162	4994893	4996215	1315	1323	forward	6.22906e-212	2284
687	8843355	8844603	7328209	7329463	1249	1255	forward	1.22872e-211	2281
688	4096830	4095681	7891553	7892701	1150	1149	reverse	1.93259e-211	2279
689	2599007	2600672	3600837	3602505	1666	1669	forward	2.42372e-211	2278
690	5909645	5910926	9017051	9018298	1282	1248	forward	5.99593e-211	2274
691	10615197	10613882	134605	135920	1316	1316	reverse	7.51969e-211	2273
692	3996764	3998989	7911997	7914216	2226	2220	forward	1.86026e-210	2269
693	4634121	4635694	1494623	1496205	1574	1583	forward	2.92591e-210	2267
694	8756521	8757684	7350485	7351648	1164	1164	forward	2.92591e-210	2267
695	5924444	5925992	9031311	9032851	1549	1541	forward	7.23827e-210	2263
696	8658141	8659778	9672894	9674655	1638	1762	forward	7.23827e-210	2263
697	941313	942626	5346036	5347347	1314	1312	forward	9.07775e-210	2262
698	2435894	2434709	3386071	3387258	1186	1188	reverse	1.13847e-209	2261
699	10230021	10228743	4534364	4535634	1279	1271	reverse	1.42779e-209	2260
700	3399183	3396742	2482679	2485112	2442	2434	reverse	1.79064e-209	2259
701	1746823	1745394	5525436	5526862	1430	1427	reverse	3.53215e-209	2256
702	1501189	1500377	9380721	9381539	813	819	reverse	5.55553e-209	2254
703	2593421	2595634	3595315	3597522	2214	2208	forward	5.55553e-209	2254
704	7023676	7022146	5400320	5401825	1531	1506	reverse	1.72362e-208	2249
705	7093997	7095377	1127619	1128999	1381	1381	forward	4.26399e-208	2245
706	2726034	2728230	5151380	5153681	2197	2302	forward	4.26399e-208	2245
707	9969925	9969038	10203726	10204613	888	888	reverse	5.34761e-208	2244
708	2441852	2440605	3378971	3380218	1248	1248	reverse	8.41098e-208	2242
709	3540838	3538565	6702323	6704602	2274	2280	reverse	1.65912e-207	2239
710	2893990	2892848	6170867	6172015	1143	1149	reverse	2.08075e-207	2238
711	7205792	7207274	802839	804321	1483	1483	forward	2.08075e-207	2238
712	2499504	2501467	3504650	3506583	1964	1934	forward	2.08075e-207	2238
713	3754885	3753718	10318571	10319745	1168	1175	reverse	2.60954e-207	2237
714	1709463	1708515	4171566	4172514	949	949	reverse	5.14747e-207	2234
715	727475	725349	5811954	5814077	2127	2124	reverse	8.0962e-207	2232
716	5799125	5800314	3104694	3105904	1190	1211	forward	1.27341e-206	2230
717	10700534	10698820	7732791	7734505	1715	1715	reverse	2.00288e-206	2228
718	93118	91591	5000963	5002491	1528	1529	reverse	3.9508e-206	2225
719	2768632	2769396	10335892	10336656	765	765	forward	3.9508e-206	2225
720	7205208	7203115	3267106	3269213	2094	2108	reverse	6.21401e-206	2223
721	2558105	2556522	5260768	5262348	1584	1581	reverse	7.79319e-206	2222
722	9808047	9807023	8324047	8325071	1025	1025	reverse	1.92792e-205	2218
723	4990992	4989801	749495	750680	1192	1186	reverse	3.03233e-205	2216
724	1756370	1754405	1113260	1115213	1966	1954	reverse	3.80294e-205	2215
725	7301953	7300498	8872732	8874187	1456	1456	reverse	4.76939e-205	2214
726	7451089	7452500	4986998	4988403	1412	1406	forward	1.17988e-204	2210
727	3145841	3146727	2872477	2873362	887	886	forward	2.91884e-204	2206
728	2129581	2131000	3268106	3269534	1420	1429	forward	1.13572e-203	2200
729	1185242	1183657	3237871	3239468	1586	1598	reverse	2.8096e-203	2196
730	7452507	7451086	7594944	7596359	1422	1416	reverse	2.8096e-203	2196
731	5684419	5685521	6874400	6875502	1103	1103	forward	3.52361e-203	2195
732	8439692	8441261	9740220	9741759	1570	1540	forward	5.54211e-203	2193
733	4828685	4826761	2650971	2652904	1925	1934	reverse	1.37104e-202	2189
734	919557	920226	5321058	5321728	670	671	forward	1.71946e-202	2188
735	5241385	5242865	9133862	9135345	1481	1484	forward	2.15643e-202	2187
736	10154218	10155558	3870570	3871904	1341	1335	forward	4.25369e-202	2184
737	1600236	1601519	10028726	10030009	1284	1284	forward	4.25369e-202	2184
738	2971982	2973754	521587	523394	1773	1808	forward	5.33469e-202	2183
739	6745410	6743904	3566322	3567825	1507	1504	reverse	1.31972e-201	2179
740	8697369	8698731	2189523	2190845	1363	1323	forward	1.65511e-201	2178
741	4907052	4906018	9122604	9123636	1035	1033	reverse	2.60323e-201	2176
742	5280107	5278325	224896	226667	1783	1772	reverse	3.2648e-201	2175
743	1614058	1612730	7805533	7806861	1329	1329	reverse	1.01292e-200	2170
744	2902775	2903877	6183260	6184360	1103	1101	forward	1.59317e-200	2168
745	3772779	3773818	4892537	4893576	1040	1040	forward	3.14261e-200	2165
746	7261002	7258844	7572296	7574454	2159	2159	reverse	3.94126e-200	2164
747	10645162	10644358	7400655	7401480	805	826	reverse	9.75008e-200	2160
748	4572365	4573753	7845636	7847041	1389	1406	forward	1.22279e-199	2159
749	7094007	7095313	3268109	3269421	1307	1313	forward	1.53354e-199	2158
750	2589134	2590089	3590697	3591646	956	950	forward	3.79375e-199	2154
751	10556173	10557169	407903	408899	997	997	forward	4.75787e-199	2153
752	376114	374777	1056461	1057702	1338	1242	reverse	5.967e-199	2152
753	900376	901200	10335891	10336719	825	829	forward	5.967e-199	2152
754	426609	425576	6609698	6610651	1034	954	reverse	1.17703e-198	2149
755	4171298	4172322	9196241	9197258	1025	1018	forward	1.17703e-198	2149
756	4085351	4083866	6845755	6847295	1486	1541	reverse	2.32175e-198	2146
757	4851079	4849137	2624259	2626175	1943	1917	reverse	2.91179e-198	2145
758	5239064	5240934	9131427	9133294	1871	1868	forward	3.65177e-198	2144
759	632019	631073	2355806	2356755	947	950	reverse	4.5798e-198	2143
760	7953491	7952245	7099694	7100940	1247	1247	reverse	4.5798e-198	2143
761	9967387	9968370	2330248	2331231	984	984	forward	5.74368e-198	2142
762	2511411	2512812	3517969	3519361	1402	1393	forward	5.74368e-198	2142
763	4178555	4179178	7421917	7422539	624	623	forward	5.74368e-198	2142
764	8680368	8681478	2172577	2173728	1111	1152	forward	7.20333e-198	2141
765	5795541	5796463	4017403	4018309	923	907	forward	7.20333e-198	2141
766	2856834	2855580	6118137	6119378	1255	1242	reverse	9.03394e-198	2140
767	3987989	3989601	8699170	8700782	1613	1613	forward	9.03394e-198	2140
768	7350024	7348825	5754254	5755453	1200	1200	reverse	1.4209e-197	2138
769	10086614	10085493	6784629	6785756	1122	1128	reverse	1.4209e-197	2138
770	9169673	9168194	7132882	7134368	1480	1487	reverse	1.782e-197	2137
771	2904287	2905656	6180822	6182179	1370	1358	forward	5.52872e-197	2132
772	620520	618941	252164	253745	1580	1582	reverse	8.69584e-197	2130
773	1697055	1695397	10388779	10390435	1659	1657	reverse	8.69584e-197	2130
774	3823821	3822718	8283717	8284823	1104	1107	reverse	1.09057e-196	2129
775	3395463	3394363	3700088	3701189	1101	1102	reverse	1.71531e-196	2127
776	3465872	3464768	6714870	6715980	1105	1111	reverse	1.65111e-195	2117
777	5545854	5546821	1609723	1610687	968	965	forward	2.07071e-195	2116
778	5890622	5891754	8995183	8996315	1133	1133	forward	2.59695e-195	2115
779	1456929	1458336	10611450	10612866	1408	1417	forward	3.25691e-195	2114
780	163280	161959	5029104	5030424	1322	1321	reverse	4.0846e-195	2113
781	357519	356301	7760499	7761684	1219	1186	reverse	5.12263e-195	2112
782	1748365	1749905	802806	804346	1541	1541	forward	8.05712e-195	2110
783	1081865	1083644	8587043	8588955	1780	1913	forward	8.05712e-195	2110
784	7142690	7144046	5573222	5574578	1357	1357	forward	1.58932e-194	2107
785	8445856	8447297	9743856	9745297	1442	1442	forward	3.93173e-194	2103
786	9991372	9992517	10254735	10255880	1146	1146	forward	9.72653e-194	2099
787	10797887	10799175	4950827	4952115	1289	1289	forward	1.21984e-193	2098
788	440966	439559	6595404	6596819	1408	1416	reverse	1.52984e-193	2097
789	2171754	2172810	828842	829898	1057	1057	forward	1.91862e-193	2096
790	8466863	8465622	1311937	1313178	1242	1242	reverse	2.4062e-193	2095
791	1575910	1577117	2953506	2954713	1208	1208	forward	4.74637e-193	2092
792	585512	587806	8208305	8210626	2295	2322	forward	4.74637e-193	2092
793	4046518	4048312	7396279	7398065	1795	1787	forward	7.46532e-193	2090
794	4163666	4162385	7741380	7742662	1282	1283	reverse	1.47258e-192	2087
795	819792	820601	8615710	8616531	810	822	forward	1.47258e-192	2087
796	8453400	8452185	1320704	1321916	1216	1213	reverse	1.84681e-192	2086
797	634945	636102	2346476	2347627	1158	1152	forward	2.31615e-192	2085
798	11157769	11156098	6239468	6241121	1672	1654	reverse	5.7298e-192	2081
799	9971558	9970675	10202289	10203172	884	884	reverse	5.7298e-192	2081
800	711535	712823	632241	633535	1289	1295	forward	5.7298e-192	2081
801	4559383	4560264	7831198	7832079	882	882	forward	9.01211e-192	2079
802	6943278	6944336	8508228	8509287	1059	1060	forward	1.77769e-191	2076
803	9860579	9859675	6766604	6767517	905	914	reverse	2.22946e-191	2075
804	9208487	9209856	5735845	5737214	1370	1370	forward	2.22946e-191	2075
805	9830850	9831918	10705438	10706506	1069	1069	forward	2.79604e-191	2074
806	11173410	11171289	6228082	6230190	2122	2109	reverse	3.50661e-191	2073
807	1501189	1500368	8862726	8863550	822	825	reverse	3.50661e-191	2073
808	3945129	3943327	4047382	4049184	1803	1803	reverse	6.91699e-191	2070
809	468331	467649	7421917	7422602	683	686	reverse	6.91699e-191	2070
810	8169560	8170189	4804100	4804752	630	653	forward	1.08794e-190	2068
811	762406	763472	11029045	11030111	1067	1067	forward	1.08794e-190	2068
812	2074346	2075426	7634942	7636023	1081	1082	forward	1.36442e-190	2067
813	5809078	5807611	3096479	3097944	1468	1466	reverse	1.71116e-190	2066
814	9770701	9768988	4272330	4274040	1714	1711	reverse	2.14602e-190	2065
815	9349131	9347883	8621132	8622383	1249	1252	reverse	2.14602e-190	2065
816	6648911	6648084	8832508	8833338	828	831	reverse	2.14602e-190	2065
817	3804568	3803433	8301165	8302303	1136	1139	reverse	3.37537e-190	2063
818	2830657	2829803	1725906	1726750	855	845	reverse	1.31335e-189	2057
819	7175761	7176526	5611907	5612672	766	766	forward	2.06571e-189	2055
820	3250043	3249025	3479415	3480423	1019	1009	reverse	3.24905e-189	2053
821	11000251	11000972	876878	877598	722	721	forward	6.40894e-189	2050
822	10683753	10682154	6334018	6335605	1600	1588	reverse	1.00803e-188	2048
823	7294417	7293594	8534414	8535236	824	823	reverse	1.2642e-188	2047
824	4983877	4985483	6334018	6335614	1607	1597	forward	1.2642e-188	2047
825	8161045	8161681	4804100	4804752	637	653	forward	1.9884e-188	2045
826	1663793	1666530	10400897	10403676	2738	2780	forward	2.49371e-188	2044
827	10078309	10077233	6794516	6795592	1077	1077	reverse	3.92223e-188	2042
828	11116367	11115138	7201172	7202401	1230	1230	reverse	3.92223e-188	2042
829	4930162	4929124	3802048	3803089	1039	1042	reverse	4.919e-188	2041
830	7095376	7093973	799862	801259	1404	1398	reverse	6.16908e-188	2040
831	7128058	7125748	5553254	5555573	2311	2320	reverse	6.16908e-188	2040
832	9498831	9497672	9752336	9753504	1160	1169	reverse	1.21689e-187	2037
833	2126196	2127590	1124248	1125650	1395	1403	forward	1.21689e-187	2037
834	3629704	3631393	3205378	3207064	1690	1687	forward	1.91398e-187	2035
835	8294536	8295644	8079872	8080980	1109	1109	forward	1.91398e-187	2035
836	8585963	8584273	4851467	4853224	1691	1758	reverse	2.40039e-187	2034
837	6066739	6067722	2309002	2310000	984	999	forward	3.0104e-187	2033
838	4553154	4551458	9281580	9283276	1697	1697	reverse	9.33989e-187	2028
839	9226877	9225589	7152950	7154241	1289	1292	reverse	1.46902e-186	2026
840	7213476	7212296	3258135	3259317	1181	1183	reverse	2.89774e-186	2023
841	2050412	2049403	1102220	1103229	1010	1010	reverse	4.5577e-186	2021
842	11140491	11139123	6256708	6258073	1369	1366	reverse	8.99034e-186	2018
843	130730	132753	4490196	4492228	2024	2033	forward	1.41404e-185	2016
844	7775085	7775725	444838	445476	641	639	forward	2.78929e-185	2013
845	5833336	5832026	4583836	4585149	1311	1314	reverse	4.38713e-185	2011
846	11033036	11032007	2968900	2969929	1030	1030	reverse	6.90028e-185	2009
847	10412086	10410568	9864354	9865875	1519	1522	reverse	6.90028e-185	2009
848	7223778	7224445	6973481	6974151	668	671	forward	6.90028e-185	2009
849	9793107	9791195	4246811	4248716	1913	1906	reverse	8.65387e-185	2008
850	2018713	2017512	5874674	5875873	1202	1200	reverse	8.65387e-185	2008
851	581808	582475	7189867	7190535	668	669	forward	1.08531e-184	2007
852	6453009	6452105	6144390	6145294	905	905	reverse	1.36112e-184	2006
853	2235101	2236472	2215227	2216602	1372	1376	forward	1.36112e-184	2006
854	536266	535255	1797715	1798726	1012	1012	reverse	1.70703e-184	2005
855	6806424	6805503	10500094	10501015	922	922	reverse	1.70703e-184	2005
856	7103306	7104394	5534834	5535919	1089	1086	forward	2.6849e-184	2003
857	2891130	2889012	6173922	6176043	2119	2122	reverse	3.36722e-184	2002
858	2910155	2909289	3041487	3042353	867	867	reverse	4.22293e-184	2001
859	7750798	7751763	105486	106451	966	966	forward	6.64204e-184	1999
860	5706612	5708654	3131542	3133605	2043	2064	forward	6.64204e-184	1999
861	731162	732363	10992820	10994024	1202	1205	forward	8.32999e-184	1998
862	8017909	8016521	8461480	8462857	1389	1378	reverse	1.04469e-183	1997
863	8839337	8840442	7322386	7323502	1106	1117	forward	2.58441e-183	1993
864	1661682	1662784	8097987	8099089	1103	1103	forward	3.2412e-183	1992
865	10057513	10055727	7661253	7663033	1787	1781	reverse	4.06489e-183	1991
866	1088063	1089267	7484286	7485482	1205	1197	forward	4.06489e-183	1991
867	7307633	7306332	4583857	4585158	1302	1302	reverse	5.09791e-183	1990
868	185344	184590	9380598	9381357	755	760	reverse	3.11989e-182	1982
869	2795808	2796777	6110663	6111631	970	969	forward	3.11989e-182	1982
870	8379348	8378112	860209	861490	1237	1282	reverse	3.91276e-182	1981
871	10064904	10064247	7653409	7654066	658	658	reverse	4.90712e-182	1980
872	10064904	10064267	5916063	5916700	638	638	reverse	7.71815e-182	1978
873	7609823	7611077	1900408	1901662	1255	1255	forward	9.67959e-182	1977
874	4907043	4906028	8788778	8789793	1016	1016	reverse	1.90936e-181	1974
875	6978151	6979641	8881966	8883458	1491	1493	forward	1.90936e-181	1974
876	6775151	6774112	10533517	10534553	1040	1037	reverse	3.00313e-181	1972
877	3547963	3549032	7982142	7983222	1070	1081	forward	3.76632e-181	1971
878	2669253	2667636	3875782	3877390	1618	1609	reverse	2.89074e-180	1962
879	6874319	6875027	6880667	6881378	709	712	forward	3.62537e-180	1961
880	11000365	11000971	2584758	2585364	607	607	forward	5.70215e-180	1959
881	2367324	2366040	2797495	2798790	1285	1296	reverse	8.96862e-180	1957
882	3568090	3569456	8002880	8004240	1367	1361	forward	8.96862e-180	1957
883	8580443	8579081	4857348	4858702	1363	1355	reverse	1.12478e-179	1956
884	185344	184420	8862605	8863550	925	946	reverse	1.12478e-179	1956
885	8951390	8950759	8901980	8902612	632	633	reverse	1.12478e-179	1956
886	7775692	7775083	8902004	8902613	610	610	reverse	1.41063e-179	1955
887	8470868	8469230	5670075	5671714	1639	1640	reverse	2.2187e-179	1953
888	11052463	11051792	479874	480543	672	670	reverse	4.37653e-179	1950
889	9271283	9272408	10468392	10469520	1126	1129	forward	4.37653e-179	1950
890	5018396	5019269	11063830	11064700	874	871	forward	5.48874e-179	1949
891	10705171	10704026	7727662	7728807	1146	1146	reverse	6.88361e-179	1948
892	7187477	7188199	3282126	3282851	723	726	forward	6.88361e-179	1948
893	8989681	8991042	211140	212490	1362	1351	forward	8.63296e-179	1947
894	8940813	8939680	8015576	8016709	1134	1134	reverse	1.08269e-178	1946
895	10644375	10645003	5016608	5017254	629	647	forward	2.13567e-178	1943
896	7083366	7085050	5513441	5515125	1685	1685	forward	2.13567e-178	1943
897	7650217	7648467	1951976	1953723	1751	1748	reverse	4.21273e-178	1940
898	1072795	1071498	3051388	3052691	1298	1304	reverse	5.28332e-178	1939
899	7757657	7758850	116123	117313	1194	1191	forward	6.62599e-178	1938
900	7706714	7708244	9470658	9472199	1531	1542	forward	6.62599e-178	1938
901	7224482	7223778	9623176	9623875	705	700	reverse	8.30987e-178	1937
902	4566623	4567739	7838524	7839631	1117	1108	forward	8.30987e-178	1937
903	3184001	3183486	9703933	9704449	516	517	reverse	1.63917e-177	1934
904	2183519	2184885	839183	840534	1367	1352	forward	2.05574e-177	1933
905	2548135	2549135	3554859	3555843	1001	985	forward	2.05574e-177	1933
906	121733	123092	7673874	7675236	1360	1363	forward	2.05574e-177	1933
907	8535260	8536786	6618200	6619758	1527	1559	forward	2.57817e-177	1932
908	4501989	4501071	11123750	11124668	919	919	reverse	3.23337e-177	1931
909	5577221	5578311	2230592	2231682	1091	1091	forward	4.05507e-177	1930
910	739417	740460	11001165	11002208	1044	1044	forward	4.05507e-177	1930
911	1749875	1748219	3265045	3266698	1657	1654	reverse	5.08559e-177	1929
912	7777583	7778558	446848	447823	976	976	forward	5.08559e-177	1929
913	3152081	3151464	6953171	6953794	618	624	reverse	1.00316e-176	1926
914	3736525	3737639	5267507	5268621	1115	1115	forward	1.2581e-176	1925
915	7554771	7554164	876991	877598	608	608	reverse	1.57782e-176	1924
916	11175301	11174170	6226234	6227368	1132	1135	reverse	1.57782e-176	1924
917	8950760	8951367	444838	445445	608	608	forward	1.9788e-176	1923
918	7826938	7825419	2561087	2562606	1520	1520	reverse	2.48168e-176	1922
919	783822	782428	9678748	9680166	1395	1419	reverse	2.48168e-176	1922
920	10853689	10854761	11072298	11073382	1073	1085	forward	3.11236e-176	1921
921	7554884	7554161	2584651	2585368	724	718	reverse	3.90331e-176	1920
922	7606812	7605361	3618490	3619941	1452	1452	reverse	6.13931e-176	1918
923	8929109	8928186	10872461	10873384	924	924	reverse	6.13931e-176	1918
924	4813167	4814125	2699014	2699970	959	957	forward	9.6562e-176	1916
925	5096134	5097356	3965791	3967015	1223	1225	forward	1.90474e-175	1913
926	819749	820610	8862683	8863550	862	868	forward	1.90474e-175	1913
927	3034797	3034019	2108728	2109506	779	779	reverse	2.3888e-175	1912
928	4402958	4401757	7683936	7685140	1202	1205	reverse	3.75722e-175	1910
929	5588734	5589522	5687964	5688752	789	789	forward	7.41135e-175	1907
930	3692111	3690468	1439930	1441570	1644	1641	reverse	9.29481e-175	1906
931	11085492	11084217	7241135	7242410	1276	1276	reverse	1.46193e-174	1904
932	7338522	7336493	5766467	5768618	2030	2152	reverse	2.2994e-174	1902
933	5103023	5104207	3982453	3983637	1185	1185	forward	7.13397e-174	1897
934	819645	820504	9380575	9381440	860	866	forward	7.13397e-174	1897
935	9393047	9392077	9720337	9721390	971	1054	reverse	1.76484e-173	1893
936	126752	128054	5011876	5013196	1303	1321	forward	1.76484e-173	1893
937	132954	134400	4492432	4493872	1447	1441	forward	2.21334e-173	1892
938	10031489	10032132	10298561	10299205	644	645	forward	3.48125e-173	1890
939	2385014	2383862	3440468	3441617	1153	1150	reverse	5.47548e-173	1888
940	5667791	5666339	2402031	2403486	1453	1456	reverse	6.86698e-173	1887
941	2129575	2130983	5525436	5526847	1409	1412	forward	6.86698e-173	1887
942	10568854	10570166	8636438	8637756	1313	1319	forward	8.61211e-173	1886
943	6069549	6070735	2283454	2284640	1187	1187	forward	1.08007e-172	1885
944	3833557	3834833	10178808	10180091	1277	1284	forward	1.35455e-172	1884
945	10484852	10483539	4110160	4111470	1314	1311	reverse	2.13051e-172	1882
946	2774619	2775645	6087983	6089002	1027	1020	forward	3.35097e-172	1880
947	7119135	7121335	5548309	5550501	2201	2193	forward	4.20255e-172	1879
948	7201784	7200446	3270408	3271748	1339	1341	reverse	8.28979e-172	1876
949	2160286	2162281	817165	819176	1996	2012	forward	1.03965e-171	1875
950	2160487	2162302	9543003	9544822	1816	1820	forward	1.30386e-171	1874
951	3183493	3184010	10233963	10234478	518	516	forward	1.30386e-171	1874
952	5475125	5473984	1192921	1194062	1142	1142	reverse	1.63521e-171	1873
953	873683	872800	7125181	7126061	884	881	reverse	1.63521e-171	1873
954	9869215	9868142	10774491	10775558	1074	1068	reverse	1.63521e-171	1873
955	816221	816772	9703935	9704489	552	555	forward	1.63521e-171	1873
956	4762293	4761278	2754901	2755913	1016	1013	reverse	2.05077e-171	1872
957	6712111	6713375	6666925	6668201	1265	1277	forward	2.57194e-171	1871
958	5833336	5832038	11278182	11279480	1299	1299	reverse	6.3626e-171	1867
959	5886049	5886956	1177524	1178434	908	911	forward	7.97954e-171	1866
960	4548294	4549258	9369458	9370422	965	965	forward	7.97954e-171	1866
961	254128	252670	9944088	9945550	1459	1463	reverse	1.57401e-170	1863
962	8758965	8759907	7352632	7353577	943	946	forward	1.57401e-170	1863
963	10970457	10969504	8184933	8185880	954	948	reverse	1.97402e-170	1862
964	10032131	10031484	9821762	9822412	648	651	reverse	2.47568e-170	1861
965	870471	869583	931513	932406	889	894	reverse	3.10484e-170	1860
966	5464720	5463640	1205252	1206335	1081	1084	reverse	3.89388e-170	1859
967	10509260	10508291	164037	165006	970	970	reverse	6.12448e-170	1857
968	10560991	10562353	412737	414037	1363	1301	forward	6.12448e-170	1857
969	7286666	7285488	8543034	8544212	1179	1179	reverse	9.63287e-170	1855
970	1477868	1476701	9564293	9565457	1168	1165	reverse	9.63287e-170	1855
971	361566	360813	1074782	1075535	754	754	reverse	1.5151e-169	1853
972	5722342	5720741	6494821	6496443	1602	1623	reverse	1.90014e-169	1852
973	7798868	7799724	3708492	3709345	857	854	forward	2.38303e-169	1851
974	5363822	5364468	10298559	10299206	647	648	forward	2.38303e-169	1851
975	3658153	3658976	4560452	4561275	824	824	forward	2.98864e-169	1850
976	4156317	4155451	7749983	7750851	867	869	reverse	4.70067e-169	1848
977	141458	142286	4502555	4503380	829	826	forward	4.70067e-169	1848
978	5626403	5625409	1582187	1583176	995	990	reverse	5.89526e-169	1847
979	8415245	8414348	10016138	10017035	898	898	reverse	9.27236e-169	1845
980	3558826	3560481	7993890	7995559	1656	1670	forward	9.27236e-169	1845
981	1641848	1640884	9518301	9519273	965	973	reverse	1.16288e-168	1844
982	7313263	7314043	4577759	4578542	781	784	forward	1.4584e-168	1843
983	4692765	4691584	1506882	1508062	1182	1181	reverse	1.82903e-168	1842
984	397786	398726	7763282	7764219	941	938	forward	1.82903e-168	1842
985	2926483	2925247	3024521	3025757	1237	1237	reverse	2.29384e-168	1841
986	3856695	3858115	6514704	6516115	1421	1412	forward	3.60787e-168	1839
987	7244421	7243385	7410486	7411525	1037	1040	reverse	4.52475e-168	1838
988	10552838	10553752	404641	405552	915	912	forward	5.67463e-168	1837
989	9716703	9717944	10661051	10662300	1242	1250	forward	7.11674e-168	1836
990	6765244	6764049	10543296	10544488	1196	1193	reverse	8.92533e-168	1835
991	2104599	2105806	9102566	9103759	1208	1194	forward	8.92533e-168	1835
992	9778598	9776900	4263176	4264874	1699	1699	reverse	1.11936e-167	1834
993	5136931	5138327	6392494	6393875	1397	1382	forward	1.11936e-167	1834
994	8039423	8038086	8939862	8941199	1338	1338	reverse	1.76058e-167	1832
995	221916	223219	9308444	9309759	1304	1316	forward	4.3554e-167	1828
996	3363077	3364112	7616980	7618025	1036	1046	forward	6.85039e-167	1826
997	4756866	4756045	2759779	2760603	822	825	reverse	8.5913e-167	1825
998	7871426	7869746	889460	891140	1681	1681	reverse	1.07746e-166	1824
999	7033569	7034612	5456687	5457741	1044	1055	forward	1.07746e-166	1824
1000	460133	461198	9183512	9184580	1066	1069	forward	1.07746e-166	1824
1001	816727	816221	10233963	10234469	507	507	reverse	1.69469e-166	1822
1002	6874877	6874307	6953207	6953783	571	577	reverse	2.12536e-166	1821
1003	9282267	9283299	10479838	10480870	1033	1033	forward	2.12536e-166	1821
1004	5398174	5397085	8241810	8242899	1090	1090	reverse	3.34287e-166	1819
1005	5970003	5971463	5817262	5818725	1461	1464	forward	3.34287e-166	1819
1006	6975001	6973925	8884005	8885081	1077	1077	reverse	5.25783e-166	1817
1007	353338	355401	1033695	1035707	2064	2013	forward	5.25783e-166	1817
1008	9723035	9724468	10667705	10669265	1434	1561	forward	5.25783e-166	1817
1009	8396015	8394867	2510003	2511147	1149	1145	reverse	6.59401e-166	1816
1010	10807314	10808154	4958353	4959193	841	841	forward	6.59401e-166	1816
1011	240311	240965	7579861	7580518	655	658	forward	8.26977e-166	1815
1012	3079803	3078546	2077465	2078701	1258	1237	reverse	1.03714e-165	1814
1013	10968961	10968328	8186713	8187346	634	634	reverse	1.30071e-165	1813
1014	2885208	2883977	6185326	6186557	1232	1232	reverse	2.04582e-165	1811
1015	1539673	1540477	2896617	2897422	805	806	forward	2.04582e-165	1811
1016	1020118	1019419	10162872	10163571	700	700	reverse	5.06105e-165	1807
1017	549567	551896	1757814	1760143	2330	2330	forward	5.06105e-165	1807
1018	9173603	9174369	4656924	4657690	767	767	forward	7.96027e-165	1805
1019	3292550	3293167	7179186	7179797	618	612	forward	7.96027e-165	1805
1020	5444752	5445592	9805510	9806350	841	841	forward	7.96027e-165	1805
1021	5202183	5201164	4144451	4145470	1020	1020	reverse	9.98323e-165	1804
1022	109291	107886	9620669	9622077	1406	1409	reverse	1.96925e-164	1801
1023	2797981	2798862	6112695	6113576	882	882	forward	2.4697e-164	1800
1024	7461362	7462622	7044775	7046038	1261	1264	forward	2.4697e-164	1800
1025	4055218	4056640	7567188	7568544	1423	1357	forward	4.87164e-164	1797
1026	4426066	4424870	4983533	4984731	1197	1199	reverse	6.10968e-164	1796
1027	6691746	6690351	6686852	6688295	1396	1444	reverse	6.10968e-164	1796
1028	8776056	8777313	7368864	7370121	1258	1258	forward	7.66235e-164	1795
1029	7207274	7205867	1124554	1125967	1408	1414	reverse	9.6096e-164	1794
1030	659374	658169	2360235	2361446	1206	1212	reverse	9.6096e-164	1794
1031	8285175	8286521	8072387	8073736	1347	1350	forward	9.6096e-164	1794
1032	2094322	2095320	5176476	5177477	999	1002	forward	1.20517e-163	1793
1033	240865	240305	7403342	7403903	561	562	reverse	1.51144e-163	1792
1034	8008139	8009271	10318572	10319710	1133	1139	forward	2.37727e-163	1790
1035	2743251	2742678	522712	523285	574	574	reverse	2.98142e-163	1789
1036	3151479	3152047	6880659	6881229	569	571	forward	3.73909e-163	1788
1037	2171744	2172812	3690083	3691142	1069	1060	forward	4.68931e-163	1787
1038	4546378	4545672	8660428	8661142	707	715	reverse	5.88102e-163	1786
1039	3267173	3266103	3495407	3496478	1071	1072	reverse	7.37558e-163	1785
1040	7721072	7722054	1135781	1136769	983	989	forward	9.24996e-163	1784
1041	1711420	1710310	4169622	4170726	1111	1105	reverse	1.16007e-162	1783
1042	6001904	6003158	5839919	5841178	1255	1260	forward	1.82461e-162	1781
1043	3459894	3460529	3778596	3779234	636	639	forward	2.86983e-162	1779
1044	5437866	5440544	9799270	9801959	2679	2690	forward	2.86983e-162	1779
1045	10695706	10696769	6592129	6593193	1064	1065	forward	4.51381e-162	1777
1046	1135630	1136425	5085572	5086358	796	787	forward	5.66092e-162	1776
1047	9316381	9315018	1215817	1217185	1364	1369	reverse	7.09955e-162	1775
1048	10993457	10992506	8152033	8152966	952	934	reverse	1.75632e-161	1771
1049	8960695	8959469	8891514	8892763	1227	1250	reverse	1.75632e-161	1771
1050	6409984	6410800	10964554	10965367	817	814	forward	2.20266e-161	1770
1051	2973060	2973649	52341	52930	590	590	forward	2.76243e-161	1769
1052	8616181	8614677	7688251	7689761	1505	1511	reverse	3.46445e-161	1768
1053	2759817	2760881	6072346	6073402	1065	1057	forward	3.46445e-161	1768
1054	7962142	7960065	171435	173515	2078	2081	reverse	5.44906e-161	1766
1055	10167599	10166603	3151475	3152478	997	1004	reverse	5.44906e-161	1766
1056	9624094	9625005	4363299	4364209	912	911	forward	5.44906e-161	1766
1057	7008890	7007892	5424571	5425569	999	999	reverse	6.83384e-161	1765
1058	6628987	6628066	7063797	7064710	922	914	reverse	6.83384e-161	1765
1059	970259	971443	5226303	5227493	1185	1191	forward	6.83384e-161	1765
1060	9649906	9650884	4388423	4389401	979	979	forward	8.57054e-161	1764
1061	10984304	10983331	8160455	8161429	974	975	reverse	1.69059e-160	1761
1062	8823455	8824825	7305374	7306776	1371	1403	forward	1.69059e-160	1761
1063	4100999	4100207	7887021	7887813	793	793	reverse	2.12023e-160	1760
1064	9317026	9317615	8887273	8887864	590	592	forward	2.12023e-160	1760
1065	5859723	5858486	7791873	7793050	1238	1178	reverse	5.24512e-160	1756
1066	10384638	10383614	9770666	9771687	1025	1022	reverse	8.24979e-160	1754
1067	8773959	8774974	7366817	7367884	1016	1068	forward	8.24979e-160	1754
1068	5098888	5099750	3968225	3969090	863	866	forward	1.03463e-159	1753
1069	7154667	7155960	5591264	5592494	1294	1231	forward	1.29757e-159	1752
1070	8482710	8481559	5657175	5658333	1152	1159	reverse	1.62732e-159	1751
1071	4178913	4178406	9195390	9195897	508	508	reverse	1.62732e-159	1751
1072	2743250	2742678	52356	52928	573	573	reverse	2.04088e-159	1750
1073	7251295	7250733	7403339	7403901	563	563	reverse	2.04088e-159	1750
1074	2092067	2093146	5174467	5175564	1080	1098	forward	2.55953e-159	1749
1075	4177046	4178010	9202791	9203752	965	962	forward	5.04882e-159	1746
1076	8375232	8374350	864287	865169	883	883	reverse	6.33189e-159	1745
1077	185223	184513	8615710	8616420	711	711	reverse	6.33189e-159	1745
1078	10617313	10618108	4922657	4923452	796	796	forward	7.94103e-159	1744
1079	6507438	6508427	3823145	3824137	990	993	forward	1.56642e-158	1741
1080	11041437	11040746	496228	496919	692	692	reverse	1.96449e-158	1740
1081	1051481	1050043	10137817	10139255	1439	1439	reverse	1.96449e-158	1740
1082	2715626	2716226	3778557	3779162	601	606	forward	1.96449e-158	1740
1083	9292812	9291239	3875807	3877362	1574	1556	reverse	3.08985e-158	1738
1084	4768491	4767782	5335146	5335855	710	710	reverse	3.08985e-158	1738
1085	11008122	11007391	468225	468956	732	732	reverse	3.87508e-158	1737
1086	3590746	3589912	7873213	7874041	835	829	reverse	4.85987e-158	1736
1087	1541084	1542737	2898178	2899840	1654	1663	forward	6.09492e-158	1735
1088	4542216	4540325	8664159	8666065	1892	1907	reverse	7.64384e-158	1734
1089	9190054	9191277	7138946	7140166	1224	1221	forward	9.58638e-158	1733
1090	1565792	1567276	2945004	2946483	1485	1480	forward	1.20226e-157	1732
1091	467973	468479	9195390	9195896	507	507	forward	1.20226e-157	1732
1092	2162940	2164212	819754	821041	1273	1288	forward	2.37153e-157	1729
1093	8836105	8837635	7318823	7320356	1531	1534	forward	2.37153e-157	1729
1094	8532466	8531516	9207526	9208476	951	951	reverse	2.97421e-157	1728
1095	6308618	6309567	6376008	6376958	950	951	forward	2.97421e-157	1728
1096	368350	367314	1063690	1064726	1037	1037	reverse	4.67799e-157	1726
1097	4481083	4482443	10592092	10593455	1361	1364	forward	5.86681e-157	1725
1098	5176054	5175491	5919010	5919573	564	564	reverse	7.35776e-157	1724
1099	5882717	5883340	1172267	1172891	624	625	forward	1.8202e-156	1720
1100	9541308	9542027	1364460	1365179	720	720	forward	1.8202e-156	1720
1101	2715627	2716228	5138555	5139160	602	606	forward	2.28277e-156	1719
1102	5723687	5725092	6534266	6535638	1406	1373	forward	2.28277e-156	1719
1103	9283849	9285006	10481755	10482943	1158	1189	forward	2.28277e-156	1719
1104	2744980	2743732	50303	51548	1249	1246	reverse	4.50291e-156	1716
1105	8318488	8317392	10398600	10399696	1097	1097	reverse	5.64724e-156	1715
1106	618881	620529	6492135	6493819	1649	1685	forward	7.08239e-156	1714
1107	6339998	6339190	673777	674603	809	827	reverse	8.88226e-156	1713
1108	3160007	3158803	6942740	6943950	1205	1211	reverse	1.11395e-155	1712
1109	6307006	6307935	6374087	6375013	930	927	forward	1.11395e-155	1712
1110	3459894	3460458	5138593	5139158	565	566	forward	1.39704e-155	1711
1111	2721375	2722269	5146929	5147820	895	892	forward	1.39704e-155	1711
1112	2208611	2207497	2239974	2241094	1115	1121	reverse	1.75208e-155	1710
1113	930378	929670	2657350	2658058	709	709	reverse	4.33439e-155	1706
1114	5175483	5176052	6432607	6433176	570	570	forward	5.43589e-155	1705
1115	9678022	9679025	4420691	4421700	1004	1010	forward	8.54984e-155	1703
1116	387668	388207	7179264	7179804	540	541	forward	1.07226e-154	1702
1117	9364610	9363768	4074403	4075245	843	843	reverse	1.34476e-154	1701
1118	7250738	7251311	7579861	7580430	574	570	forward	1.34476e-154	1701
1119	1427935	1429197	10582336	10583544	1263	1209	forward	1.68651e-154	1700
1120	8551429	8549790	9221021	9222666	1640	1646	reverse	2.1151e-154	1699
1121	337601	338139	1282047	1282585	539	539	forward	2.65262e-154	1698
1122	10118888	10120162	4596038	4597327	1275	1290	forward	2.65262e-154	1698
1123	3293170	3292641	1044378	1044906	530	529	reverse	5.23245e-154	1695
1124	1546168	1546877	2905805	2906517	710	713	forward	6.56219e-154	1694
1125	9776686	9775717	4265088	4266057	970	970	reverse	1.62339e-153	1690
1126	10450273	10449016	5116504	5117762	1258	1259	reverse	1.62339e-153	1690
1127	1364008	1362306	2306031	2307734	1703	1704	reverse	4.01602e-153	1686
1128	6957206	6958109	8524358	8525261	904	904	forward	4.01602e-153	1686
1129	1281328	1282330	304500	305508	1003	1009	forward	5.03663e-153	1685
1130	3794026	3792941	6874426	6875505	1086	1080	reverse	6.3166e-153	1684
1131	1047468	1046226	11024579	11025815	1243	1237	reverse	1.95975e-152	1679
1132	468480	468004	7421340	7421816	477	477	reverse	2.45778e-152	1678
1133	1063348	1063915	5919009	5919576	568	568	forward	2.45778e-152	1678
1134	7250736	7251295	9326349	9326908	560	560	forward	3.08239e-152	1677
1135	1746822	1745374	1492705	1494154	1449	1450	reverse	6.08019e-152	1674
1136	522450	521061	7529580	7530984	1390	1405	reverse	6.08019e-152	1674
1137	7581437	7582473	3681768	3682810	1037	1043	forward	7.62537e-152	1673
1138	4178407	4178882	7421341	7421816	476	476	forward	7.62537e-152	1673
1139	3085531	3083635	2071645	2073550	1897	1906	reverse	9.56322e-152	1672
1140	5690712	5692036	4120370	4121705	1325	1336	forward	9.56322e-152	1672
1141	3361250	3362133	7611120	7611994	884	875	forward	1.19935e-151	1671
1142	7918155	7919324	10349172	10350345	1170	1174	forward	1.19935e-151	1671
1143	430035	428843	6606542	6607737	1193	1196	reverse	2.3658e-151	1668
1144	1272257	1273787	293802	295337	1531	1536	forward	3.72104e-151	1666
1145	9588913	9590352	4298919	4300346	1440	1428	forward	3.72104e-151	1666
1146	513529	514359	7476553	7477380	831	828	forward	4.66668e-151	1665
1147	6750488	6751475	8846932	8847924	988	993	forward	4.66668e-151	1665
1148	2356527	2355557	2807362	2808329	971	968	reverse	5.85264e-151	1664
1149	1649286	1650327	4553253	4554288	1042	1036	forward	5.85264e-151	1664
1150	388200	387675	1044381	1044906	526	526	reverse	7.33999e-151	1663
1151	10813247	10814779	293761	295308	1533	1548	forward	7.33999e-151	1663
1152	7976289	7977020	3110755	3111486	732	732	forward	9.20531e-151	1662
1153	10158354	10159261	3873937	3874844	908	908	forward	9.20531e-151	1662
1154	3770350	3771247	5224478	5225375	898	898	forward	9.20531e-151	1662
1155	7130105	7128784	5550823	5552147	1322	1325	reverse	1.15447e-150	1661
1156	3415625	3416424	3720589	3721388	800	800	forward	3.58178e-150	1656
1157	817915	818724	8860433	8861242	810	810	forward	3.58178e-150	1656
1158	5902916	5903713	9007822	9008630	798	809	forward	4.49203e-150	1655
1159	5319771	5320831	9828528	9829587	1061	1060	forward	5.6336e-150	1654
1160	1615998	1615000	7803844	7804842	999	999	reverse	7.06528e-150	1653
1161	10077578	10076255	6795247	6796585	1324	1339	reverse	8.8608e-150	1652
1162	2877376	2876450	6193029	6193958	927	930	reverse	1.11126e-149	1651
1163	2943617	2942572	3006902	3007944	1046	1043	reverse	1.39367e-149	1650
1164	2618799	2620402	1875680	1877232	1604	1553	forward	2.7491e-149	1647
1165	430742	429699	6605842	6606878	1044	1037	reverse	4.32391e-149	1645
1166	4144186	4142763	4697790	4699214	1424	1425	reverse	5.42276e-149	1644
1167	395801	395261	6579900	6580446	541	547	reverse	1.06967e-148	1641
1168	2139369	2141296	4490362	4492304	1928	1943	forward	1.34151e-148	1640
1169	3950505	3951397	6031043	6031935	893	893	forward	1.34151e-148	1640
1170	1570479	1569001	2950202	2951702	1479	1501	reverse	1.68243e-148	1639
1171	2809140	2810122	1751155	1752146	983	992	forward	1.68243e-148	1639
1172	2601515	2602591	3603038	3604091	1077	1054	forward	1.68243e-148	1639
1173	1225851	1224677	616778	617952	1175	1175	reverse	2.64621e-148	1637
1174	5255653	5254868	9120937	9121717	786	781	reverse	2.64621e-148	1637
1175	291566	290557	9908438	9909447	1010	1010	reverse	2.64621e-148	1637
1176	7888003	7889066	5294050	5295113	1064	1064	forward	4.16209e-148	1635
1177	2802107	2803296	1744848	1746031	1190	1184	forward	8.20997e-148	1632
1178	5637514	5636354	1570557	1571708	1161	1152	reverse	1.02964e-147	1631
1179	9672611	9673749	4414008	4415137	1139	1130	forward	1.2913e-147	1630
1180	1063915	1063350	6432612	6433177	566	566	reverse	2.03103e-147	1628
1181	1068438	1067260	99347	100528	1179	1182	reverse	2.54718e-147	1627
1182	2965575	2966578	513667	514666	1004	1000	forward	4.00632e-147	1625
1183	1240489	1239163	378664	379993	1327	1330	reverse	5.02446e-147	1624
1184	1272254	1273784	4964033	4965574	1531	1542	forward	5.02446e-147	1624
1185	4415203	4414105	8457735	8458824	1099	1090	reverse	6.30134e-147	1623
1186	8417653	8416179	10013860	10015331	1475	1472	reverse	6.30134e-147	1623
1187	2103238	2104195	9101281	9102238	958	958	forward	1.24298e-146	1620
1188	3046555	3045581	2096659	2097631	975	973	reverse	1.55886e-146	1619
1189	3851103	3849922	6526355	6527536	1182	1182	reverse	1.55886e-146	1619
1190	2969230	2969977	518055	518801	748	747	forward	1.55886e-146	1619
1191	6580488	6579454	1677067	1678090	1035	1024	reverse	3.07494e-146	1616
1192	3938907	3939394	182613	183100	488	488	forward	3.07494e-146	1616
1193	4633546	4632243	799938	801229	1304	1292	reverse	3.85638e-146	1615
1194	3710800	3709825	10094021	10094990	976	970	reverse	6.0655e-146	1613
1195	6778075	6776918	10530610	10531763	1158	1154	reverse	6.0655e-146	1613
1196	5333768	5334854	345784	346873	1087	1090	forward	9.54012e-146	1611
1197	3523764	3524824	6729765	6730824	1061	1060	forward	1.19646e-145	1610
1198	6323451	6322748	691648	692354	704	707	reverse	2.36008e-145	1607
1199	3043717	3042507	2099613	2100826	1211	1214	reverse	3.71206e-145	1605
1200	8066888	8068022	8648246	8649352	1135	1107	forward	4.65541e-145	1604
1201	170332	169135	5864596	5865796	1198	1201	reverse	7.32225e-145	1602
1202	7498235	7499415	414900	416079	1181	1180	forward	7.32225e-145	1602
1203	3897019	3897977	9963690	9964648	959	959	forward	7.32225e-145	1602
1204	6835911	6836784	1283815	1284688	874	874	forward	9.18308e-145	1601
1205	4154953	4153776	7752998	7754163	1178	1166	reverse	1.44436e-144	1599
1206	2361681	2360781	2802765	2803662	901	898	reverse	1.81142e-144	1598
1207	3952234	3953201	6033316	6034283	968	968	forward	1.81142e-144	1598
1208	7475715	7477288	3875807	3877362	1574	1556	forward	2.27176e-144	1597
1209	3940842	3939799	4056232	4057271	1044	1040	reverse	2.84908e-144	1596
1210	9401974	9401038	9714414	9715347	937	934	reverse	3.57313e-144	1595
1211	2691266	2692194	5651848	5652767	929	920	forward	3.57313e-144	1595
1212	4516998	4518304	10842885	10844200	1307	1316	forward	3.57313e-144	1595
1213	11181131	11180365	6219788	6220554	767	767	reverse	4.48118e-144	1594
1214	1432387	1431105	11039645	11040862	1283	1218	reverse	4.48118e-144	1594
1215	4735145	4734389	2779648	2780406	757	759	reverse	5.61999e-144	1593
1216	1470379	1469861	9570549	9571067	519	519	reverse	5.61999e-144	1593
1217	8583305	8582076	4854331	4855554	1230	1224	reverse	8.83939e-144	1591
1218	2334664	2335231	5200008	5200578	568	571	forward	8.83939e-144	1591
1219	774058	772528	9686169	9687689	1531	1521	reverse	1.74362e-143	1588
1220	6061516	6062483	2303454	2304415	968	962	forward	1.74362e-143	1588
1221	9415157	9416499	92187	93535	1343	1349	forward	2.74246e-143	1586
1222	10951402	10952434	8343198	8344227	1033	1030	forward	2.74246e-143	1586
1223	3607343	3608719	8604859	8606225	1377	1367	forward	2.74246e-143	1586
1224	4470876	4471964	9269882	9270967	1089	1086	forward	2.74246e-143	1586
1225	10447383	10446445	5119239	5120177	939	939	reverse	4.31347e-143	1584
1226	929672	930391	5335149	5335870	720	722	forward	4.31347e-143	1584
1227	2755871	2756698	6069201	6070022	828	822	forward	4.31347e-143	1584
1228	1020113	1019446	1074780	1075447	668	668	reverse	8.50858e-143	1581
1229	7611617	7612685	1902235	1903311	1069	1077	forward	8.50858e-143	1581
1230	3034026	3034780	10931567	10932321	755	755	forward	8.50858e-143	1581
1231	2323285	2322526	4880654	4881425	760	772	reverse	1.33827e-142	1579
1232	8013650	8012285	4697827	4699192	1366	1366	reverse	2.1049e-142	1577
1233	10042239	10043226	3651371	3652410	988	1040	forward	2.63982e-142	1576
1234	10590947	10591836	5388496	5389387	890	892	forward	2.63982e-142	1576
1235	4123456	4122954	7967731	7968226	503	496	reverse	3.31068e-142	1575
1236	6553735	6552707	6581007	6582057	1029	1051	reverse	5.2072e-142	1573
1237	5254393	5253428	8788754	8789720	966	967	reverse	5.2072e-142	1573
1238	6016157	6017172	5852044	5853066	1016	1023	forward	5.2072e-142	1573
1239	5642569	5641502	1568651	1569729	1068	1079	reverse	6.53052e-142	1572
1240	3584854	3583780	7945450	7946521	1075	1072	reverse	8.19014e-142	1571
1241	4122956	4123420	4189363	4189824	465	462	forward	8.19014e-142	1571
1242	5009600	5011271	11054347	11056053	1672	1707	forward	8.19014e-142	1571
1243	7190491	7190964	5691671	5692144	474	474	forward	1.02715e-141	1570
1244	7220463	7221896	6969469	6970805	1434	1337	forward	1.02715e-141	1570
1245	5892357	5893128	8996928	8997697	772	770	forward	1.28818e-141	1569
1246	7190511	7190984	3285356	3285827	474	472	forward	1.61555e-141	1568
1247	6363307	6362053	645544	646798	1255	1255	reverse	2.02612e-141	1567
1248	10649136	10650208	9332591	9333676	1073	1086	forward	2.02612e-141	1567
1249	3779596	3778360	11278207	11279443	1237	1237	reverse	2.54102e-141	1566
1250	9424003	9425299	3057845	3059150	1297	1306	forward	2.54102e-141	1566
1251	3427268	3428665	3745071	3746483	1398	1413	forward	3.99664e-141	1564
1252	7057386	7058458	5481038	5482112	1073	1075	forward	5.01232e-141	1563
1253	5245064	5245725	9138162	9138838	662	677	forward	5.01232e-141	1563
1254	2334670	2335228	9772043	9772601	559	559	forward	5.01232e-141	1563
1255	3283853	3282868	7173962	7174944	986	983	reverse	6.28611e-141	1562
1256	7204013	7202812	5525651	5526846	1202	1196	reverse	9.8871e-141	1560
1257	3221758	3221281	4189364	4189836	478	473	reverse	1.23997e-140	1559
1258	177347	178444	9384404	9385498	1098	1095	forward	1.23997e-140	1559
1259	5362796	5363238	10292844	10293286	443	443	forward	1.23997e-140	1559
1260	6006901	6008235	5842874	5844230	1335	1357	forward	1.55509e-140	1558
1261	10069873	10068842	6804247	6805281	1032	1035	reverse	1.95029e-140	1557
1262	2075865	2076749	7638739	7639623	885	885	forward	2.44592e-140	1556
1263	10593579	10594052	5391805	5392278	474	474	forward	3.06751e-140	1555
1264	4780973	4782241	2668492	2669763	1269	1272	forward	3.84707e-140	1554
1265	1626138	1625688	3285348	3285798	451	451	reverse	4.82473e-140	1553
1266	6554783	6554223	6579890	6580446	561	557	reverse	4.82473e-140	1553
1267	2279301	2280630	2475640	2476967	1330	1328	forward	6.05085e-140	1552
1268	395739	395261	1036258	1036736	479	479	reverse	7.58857e-140	1551
1269	9587063	9588221	4296850	4297999	1159	1150	forward	7.58857e-140	1551
1270	8186292	8186755	4804100	4804583	464	484	forward	1.19357e-139	1549
1271	5148353	5149787	6404197	6405634	1435	1438	forward	1.8773e-139	1547
1272	10734852	10733411	7699242	7700677	1442	1436	reverse	2.35438e-139	1546
1273	8246536	8247635	8056258	8057360	1100	1103	forward	2.35438e-139	1546
1274	10383245	10382647	9772031	9772634	599	604	reverse	3.70309e-139	1544
1275	6858743	6857710	10635748	10636773	1034	1026	reverse	3.70309e-139	1544
1276	4122062	4121309	7969355	7970108	754	754	reverse	5.82439e-139	1542
1277	3938834	3939400	1089675	1090242	567	568	forward	5.82439e-139	1542
1278	984353	985170	1975562	1976377	818	816	forward	9.16089e-139	1540
1279	5618318	5617332	1591756	1592745	987	990	reverse	1.1489e-138	1539
1280	928325	928847	5391760	5392278	523	519	forward	1.1489e-138	1539
1281	10566371	10567313	8632558	8633572	943	1015	forward	1.1489e-138	1539
1282	7907533	7906232	8216702	8218007	1302	1306	reverse	1.44087e-138	1538
1283	10593579	10594053	5331852	5332326	475	475	forward	2.26627e-138	1536
1284	9360695	9360240	4078889	4079344	456	456	reverse	2.8422e-138	1535
1285	8805552	8806482	7280531	7281460	931	930	forward	2.8422e-138	1535
1286	1626121	1625688	5691700	5692133	434	434	reverse	3.5645e-138	1534
1287	10513827	10514544	598888	599602	718	715	forward	3.5645e-138	1534
1288	10331893	10332785	9065509	9066392	893	884	forward	3.5645e-138	1534
1289	1558131	1559118	2937781	2938771	988	991	forward	4.47035e-138	1533
1290	361597	360850	10162847	10163595	748	749	reverse	5.60641e-138	1532
1291	10022778	10023279	10292775	10293279	502	505	forward	8.81804e-138	1530
1292	1214190	1215197	3315929	3316957	1008	1029	forward	1.1059e-137	1529
1293	928356	928868	5331834	5332344	513	511	forward	1.1059e-137	1529
1294	616333	615114	257361	258548	1220	1188	reverse	1.38694e-137	1528
1295	8287652	8288720	8074886	8075954	1069	1069	forward	1.38694e-137	1528
1296	7321204	7322082	8482795	8483673	879	879	forward	1.38694e-137	1528
1297	10693800	10692254	6550319	6551818	1547	1500	reverse	2.18145e-137	1526
1298	9955655	9956554	6625677	6626573	900	897	forward	2.18145e-137	1526
1299	5384858	5386027	8229669	8230826	1170	1158	forward	2.73583e-137	1525
1300	6554688	6554223	1036271	1036736	466	466	reverse	3.43109e-137	1524
1301	8800199	8798923	7337871	7339076	1277	1206	reverse	3.43109e-137	1524
1302	6088203	6087356	2281532	2282379	848	848	reverse	5.39659e-137	1522
1303	10383246	10382669	5200004	5200584	578	581	reverse	5.39659e-137	1522
1304	4011565	4012419	7923165	7924023	855	859	forward	5.39659e-137	1522
1305	8632513	8633421	9641510	9642424	909	915	forward	6.76804e-137	1521
1306	9360694	9360238	1282127	1282583	457	457	reverse	1.33504e-136	1518
1307	337684	338138	4078893	4079347	455	455	forward	1.67431e-136	1517
1308	1412403	1413217	10560125	10560931	815	807	forward	1.67431e-136	1517
1309	7868961	7867785	892069	893249	1177	1181	reverse	2.09981e-136	1516
1310	5923511	5922449	2059711	2060770	1063	1060	reverse	2.63344e-136	1515
1311	7830996	7829581	2555444	2556846	1416	1403	reverse	2.63344e-136	1515
1312	10859072	10860109	11077462	11078498	1038	1037	forward	2.63344e-136	1515
1313	3646157	3645259	10448661	10449568	899	908	reverse	3.30268e-136	1514
1314	5024828	5023624	7514303	7515507	1205	1205	reverse	4.142e-136	1513
1315	5513058	5514110	8735258	8736316	1053	1059	forward	4.142e-136	1513
1316	9321098	9321585	182613	183100	488	488	forward	6.51474e-136	1511
1317	5881256	5882193	1170703	1171650	938	948	forward	6.51474e-136	1511
1318	2351785	2350669	2811762	2812878	1117	1117	reverse	8.17035e-136	1510
1319	2612438	2613348	1868560	1869473	911	914	forward	8.17035e-136	1510
1320	1401628	1400370	8857788	8859048	1259	1261	reverse	1.28507e-135	1508
1321	1090200	1091298	7486193	7487277	1099	1085	forward	1.61165e-135	1507
1322	3077611	3076691	2079525	2080446	921	922	reverse	2.02122e-135	1506
1323	8910790	8909666	10891377	10892501	1125	1125	reverse	2.02122e-135	1506
1324	7582086	7583248	3682423	3683594	1163	1172	forward	2.02122e-135	1506
1325	8220603	8219683	26818	27762	921	945	reverse	3.17908e-135	1504
1326	3873596	3872746	9992931	9993781	851	851	reverse	3.17908e-135	1504
1327	2303256	2301738	573989	575501	1519	1513	reverse	5.00021e-135	1502
1328	1175841	1175056	3248696	3249487	786	792	reverse	5.00021e-135	1502
1329	2846851	2846158	6131872	6132562	694	691	reverse	7.86457e-135	1500
1330	3221261	3221760	7967729	7968225	500	497	forward	7.86457e-135	1500
1331	8750407	8751294	8567455	8568339	888	885	forward	7.86457e-135	1500
1332	9309729	9308728	1222566	1223568	1002	1003	reverse	9.86321e-135	1499
1333	2129563	2130860	1492695	1493998	1298	1304	forward	1.23698e-134	1498
1334	10243587	10242911	4517790	4518466	677	677	reverse	1.55133e-134	1497
1335	3405687	3404671	828843	829865	1017	1023	reverse	1.94558e-134	1496
1336	2929331	2928368	3021041	3021998	964	958	reverse	1.94558e-134	1496
1337	11150683	11149536	6247014	6248161	1148	1148	reverse	1.94558e-134	1496
1338	6295087	6293268	7156217	7158031	1820	1815	reverse	1.94558e-134	1496
1339	9486470	9485452	10837096	10838120	1019	1025	reverse	1.94558e-134	1496
1340	9321103	9321584	1089754	1090235	482	482	forward	4.81307e-134	1492
1341	1143035	1144035	5963954	5964951	1001	998	forward	4.81307e-134	1492
1342	3543494	3542500	6699442	6700435	995	994	reverse	9.49408e-134	1489
1343	6043988	6043014	6281776	6282750	975	975	reverse	1.19068e-133	1488
1344	164931	166331	8428142	8429536	1401	1395	forward	1.19068e-133	1488
1345	11029038	11028079	2972975	2973937	960	963	reverse	1.49327e-133	1487
1346	9618387	9619454	4355480	4356540	1068	1061	forward	1.87276e-133	1486
1347	6656848	6658104	2306478	2307734	1257	1257	forward	2.34869e-133	1485
1348	8523965	8524726	5629643	5630413	762	771	forward	2.34869e-133	1485
1349	3708853	3708150	10096064	10096764	704	701	reverse	3.69414e-133	1483
1350	4321893	4320441	8872732	8874184	1453	1453	reverse	4.63294e-133	1482
1351	5203989	5205504	252164	253646	1516	1483	forward	4.63294e-133	1482
1352	2422847	2421934	3398467	3399442	914	976	reverse	9.13876e-133	1479
1353	7812584	7811670	2574152	2575067	915	916	reverse	1.14612e-132	1478
1354	3306363	3307011	1883116	1883763	649	648	forward	1.14612e-132	1478
1355	10218197	10218927	6001081	6001811	731	731	forward	1.80268e-132	1476
1356	10624756	10625763	4937434	4938447	1008	1014	forward	2.83533e-132	1474
1357	7838936	7837556	2547689	2549120	1381	1432	reverse	3.55589e-132	1473
1358	6353677	6352757	658030	658950	921	921	reverse	7.0142e-132	1470
1359	6449428	6450521	6161829	6162922	1094	1094	forward	7.0142e-132	1470
1360	389205	388473	1043350	1044085	733	736	reverse	1.10323e-131	1468
1361	1698821	1697853	10387242	10388207	969	966	reverse	1.38359e-131	1467
1362	2819397	2818212	1736414	1737602	1186	1189	reverse	1.73521e-131	1466
1363	5772074	5771037	3514842	3515888	1038	1047	reverse	2.17618e-131	1465
1364	7358205	7357163	9490018	9491005	1043	988	reverse	2.72922e-131	1464
1365	4827632	4828679	5340808	5341855	1048	1048	forward	3.4228e-131	1463
1366	5394167	5392842	8246086	8247414	1326	1329	reverse	4.29265e-131	1462
1367	2165765	2166370	822942	823547	606	606	forward	4.29265e-131	1462
1368	10916457	10917411	7614888	7615842	955	955	forward	4.29265e-131	1462
1369	7157373	7158350	5593522	5594492	978	971	forward	5.38355e-131	1461
1370	4841138	4840596	2634631	2635171	543	541	reverse	6.75169e-131	1460
1371	2979428	2980702	529594	530911	1275	1318	forward	6.75169e-131	1460
1372	1557124	1558509	2936843	2938162	1386	1320	forward	6.75169e-131	1460
1373	2865877	2865055	6204379	6205201	823	823	reverse	8.46751e-131	1459
1374	5539917	5540744	1637645	1638472	828	828	forward	8.46751e-131	1459
1375	5265945	5265081	239653	240521	865	869	reverse	1.06194e-130	1458
1376	10050907	10049930	7668208	7669185	978	978	reverse	1.33181e-130	1457
1377	2629416	2628754	6837079	6837741	663	663	reverse	1.67027e-130	1456
1378	6761171	6760142	10546593	10547622	1030	1030	reverse	1.67027e-130	1456
1379	1647280	1648058	4551130	4551914	779	785	forward	1.67027e-130	1456
1380	3328433	3327435	751946	752947	999	1002	reverse	2.09474e-130	1455
1381	8712448	8711293	10371286	10372447	1156	1162	reverse	2.62708e-130	1454
1382	610683	609406	1985121	1986395	1278	1275	reverse	3.2947e-130	1453
1383	1189276	1188318	3233762	3234720	959	959	reverse	3.2947e-130	1453
1384	6774226	6775101	632336	633211	876	876	forward	3.2947e-130	1453
1385	10513677	10514529	2130646	2131498	853	853	forward	3.2947e-130	1453
1386	11089570	11087850	7233381	7235093	1721	1713	reverse	5.18207e-130	1451
1387	1388764	1387788	9163798	9164759	977	962	reverse	6.499e-130	1450
1388	702348	700954	3324199	3325608	1395	1410	reverse	8.15061e-130	1449
1389	7356135	7355030	5747663	5748758	1106	1096	reverse	8.15061e-130	1449
1390	8993252	8994327	215552	216627	1076	1076	forward	8.15061e-130	1449
1391	10366872	10367334	1408628	1409090	463	463	forward	1.02219e-129	1448
1392	9285463	9287231	10483438	10485221	1769	1784	forward	1.02219e-129	1448
1393	847188	847766	948191	948760	579	570	forward	1.28197e-129	1447
1394	3766136	3767041	4607735	4608640	906	906	forward	1.28197e-129	1447
1395	3184640	3185459	10235090	10235908	820	819	forward	1.60776e-129	1446
1396	9983862	9984823	10248915	10249830	962	916	forward	2.01634e-129	1445
1397	6411395	6412358	10966057	10967032	964	976	forward	2.52876e-129	1444
1398	7557136	7556159	2581869	2582846	978	978	reverse	3.1714e-129	1443
1399	8522657	8523302	5628397	5629042	646	646	forward	3.1714e-129	1443
1400	10285767	10285021	9587390	9588136	747	747	reverse	3.97735e-129	1442
1401	1438690	1437542	11036062	11037195	1149	1134	reverse	3.97735e-129	1442
1402	8458957	8457638	1315732	1317063	1320	1332	reverse	4.98813e-129	1441
1403	6828548	6829732	1643820	1645000	1185	1181	forward	4.98813e-129	1441
1404	1119879	1120804	5075328	5076250	926	923	forward	4.98813e-129	1441
1405	572741	573638	1788589	1789483	898	895	forward	6.25577e-129	1440
1406	3437129	3437995	3752261	3753127	867	867	forward	7.84557e-129	1439
1407	9498973	9497843	7529607	7530742	1131	1136	reverse	9.83939e-129	1438
1408	10023279	10022843	9823000	9823436	437	437	reverse	9.83939e-129	1438
1409	3004222	3003040	9898208	9899392	1183	1185	reverse	9.83939e-129	1438
1410	5335461	5336514	347570	348622	1054	1053	forward	9.83939e-129	1438
1411	3012880	3011575	2131850	2133137	1306	1288	reverse	1.23399e-128	1437
1412	937386	936287	2650981	2652083	1100	1103	reverse	1.94088e-128	1435
1413	1641440	1640885	5481551	5482097	556	547	reverse	3.05271e-128	1433
1414	4716335	4717365	2726549	2727568	1031	1020	forward	3.05271e-128	1433
1415	10606519	10605523	142995	143991	997	997	reverse	3.8285e-128	1432
1416	4855107	4854369	47531	48272	739	742	reverse	4.80145e-128	1431
1417	7057994	7058443	9518823	9519272	450	450	forward	4.80145e-128	1431
1418	10832418	10833405	7539304	7540281	988	978	forward	7.55195e-128	1429
1419	522259	521306	9752355	9753311	954	957	reverse	9.47114e-128	1428
1420	9863096	9862041	6761975	6763033	1056	1059	reverse	2.34302e-127	1424
1421	6534225	6535636	7594945	7596356	1412	1412	forward	2.34302e-127	1424
1422	3685215	3684453	1445784	1446552	763	769	reverse	2.93846e-127	1423
1423	5350542	5351424	279738	280617	883	880	forward	3.68522e-127	1422
1424	1607084	1606106	7813012	7813984	979	973	reverse	7.26931e-127	1419
1425	1118416	1119684	5073868	5075134	1269	1267	forward	7.26931e-127	1419
1426	4563871	4564791	7835849	7836765	921	917	forward	7.26931e-127	1419
1427	10990668	10989319	8154631	8155956	1350	1326	reverse	9.11668e-127	1418
1428	6522927	6522120	9361020	9361821	808	802	reverse	9.11668e-127	1418
1429	5574569	5575425	2441236	2442104	857	869	forward	9.11668e-127	1418
1430	8104037	8104857	7548385	7549205	821	821	forward	9.11668e-127	1418
1431	7300506	7301960	8439093	8440550	1455	1458	forward	9.11668e-127	1418
1432	5816390	5814562	3087957	3089773	1829	1817	reverse	1.43392e-126	1416
1433	956987	957454	5361512	5361978	468	467	forward	1.43392e-126	1416
1434	7536917	7535642	2602918	2604184	1276	1267	reverse	1.79832e-126	1415
1435	7676834	7677870	9435627	9436666	1037	1040	forward	2.25533e-126	1414
1436	377546	376605	1055020	1055958	942	939	reverse	3.54729e-126	1412
1437	6112101	6111684	6313877	6314298	418	422	reverse	3.54729e-126	1412
1438	957452	956984	2634641	2635113	469	473	reverse	4.44878e-126	1411
1439	2532826	2533889	3541866	3542926	1064	1061	forward	4.44878e-126	1411
1440	54697	55849	8444696	8445869	1153	1174	forward	4.44878e-126	1411
1441	757332	758284	11024431	11025382	953	952	forward	4.44878e-126	1411
1442	5981606	5982972	9078026	9079465	1367	1440	forward	5.57936e-126	1410
1443	4066952	4068069	9449356	9450476	1118	1121	forward	5.57936e-126	1410
1444	9850966	9849113	6775543	6777437	1854	1895	reverse	6.99725e-126	1409
1445	5214545	5213559	6482719	6483704	987	986	reverse	8.77548e-126	1408
1446	1762632	1763446	4181952	4182769	815	818	forward	1.10056e-125	1407
1447	715312	714360	636374	637334	953	961	reverse	1.38025e-125	1406
1448	4537031	4535655	8669814	8671199	1377	1386	reverse	1.38025e-125	1406
1449	23402	21950	8872732	8874184	1453	1453	reverse	1.38025e-125	1406
1450	4919382	4920902	4150135	4151650	1521	1516	forward	1.73102e-125	1405
1451	8881567	8882876	10082576	10083883	1310	1308	forward	1.73102e-125	1405
1452	8006656	8005485	8443142	8444313	1172	1172	reverse	2.17092e-125	1404
1453	8819391	8820184	7298829	7299616	794	788	forward	4.28228e-125	1401
1454	1497945	1496899	8619775	8620821	1047	1047	reverse	6.73538e-125	1399
1455	3270365	3269035	3491989	3493319	1331	1331	reverse	8.44706e-125	1398
1456	6535679	6534701	4986957	4987933	979	977	reverse	8.44706e-125	1398
1457	1704134	1702900	10823799	10825030	1235	1232	reverse	1.05937e-124	1397
1458	5308772	5309950	10059699	10060877	1179	1179	forward	1.66623e-124	1395
1459	8321993	8320928	8094613	8095635	1066	1023	reverse	2.08968e-124	1394
1460	8953658	8953193	8898892	8899354	466	463	reverse	2.08968e-124	1394
1461	9642175	9641779	9422915	9423311	397	397	reverse	2.08968e-124	1394
1462	5533460	5534445	1631086	1632068	986	983	forward	2.62073e-124	1393
1463	5801010	5801969	3106267	3107223	960	957	forward	2.62073e-124	1393
1464	3451473	3452718	3769958	3771200	1246	1243	forward	2.62073e-124	1393
1465	2900168	2899317	6164850	6165710	852	861	reverse	3.28674e-124	1392
1466	4425364	4426277	7595447	7596360	914	914	forward	3.28674e-124	1392
1467	7928892	7928174	7076158	7076845	719	688	reverse	5.16955e-124	1390
1468	10543281	10543893	396749	397361	613	613	forward	5.16955e-124	1390
1469	8607459	8606510	6983820	6984772	950	953	reverse	6.4833e-124	1389
1470	1296703	1295990	329089	329802	714	714	reverse	8.13092e-124	1388
1471	8399598	8398615	3801895	3802884	984	990	reverse	8.13092e-124	1388
1472	6535205	6534231	4983757	4984731	975	975	reverse	8.13092e-124	1388
1473	10622572	10623589	4935073	4936089	1018	1017	forward	8.13092e-124	1388
1474	3313635	3314097	1890302	1890763	463	462	forward	1.01973e-123	1387
1475	1321291	1322165	2000414	2001291	875	878	forward	1.01973e-123	1387
1476	4930161	4929328	2507168	2508001	834	834	reverse	1.60387e-123	1385
1477	1688970	1688571	9422903	9423302	400	400	reverse	2.01147e-123	1384
1478	9353282	9351890	9549446	9550772	1393	1327	reverse	2.01147e-123	1384
1479	6767741	6766629	10540706	10541821	1113	1116	reverse	2.52265e-123	1383
1480	3314098	3314553	1890309	1890763	456	455	forward	2.52265e-123	1383
1481	7454217	7455557	10720003	10721331	1341	1329	forward	3.16374e-123	1382
1482	4840665	4841127	5361514	5361975	463	462	forward	3.96774e-123	1381
1483	5685521	5684482	4470063	4471108	1040	1046	reverse	6.24066e-123	1379
1484	3147485	3148768	2881872	2883088	1284	1217	forward	7.82662e-123	1378
1485	7666942	7667398	9422917	9423371	457	455	forward	7.82662e-123	1378
1486	3224044	3223387	4186850	4187507	658	658	reverse	1.54385e-122	1375
1487	2277754	2278762	2474082	2475101	1009	1020	forward	1.93619e-122	1374
1488	3622750	3623186	7992667	7993105	437	439	forward	3.81925e-122	1371
1489	9531265	9532004	1351683	1352423	740	741	forward	4.78985e-122	1370
1490	5422492	5423447	274163	275080	956	918	forward	6.0071e-122	1369
1491	3314326	3314782	1890309	1890764	457	456	forward	7.5337e-122	1368
1492	8993352	8994327	4276931	4277906	976	976	forward	7.5337e-122	1368
1493	10225857	10224596	4539451	4540715	1262	1265	reverse	9.44826e-122	1367
1494	5695642	5697061	4125864	4127295	1420	1432	forward	9.44826e-122	1367
1495	10585063	10585941	5382375	5383256	879	882	forward	9.44826e-122	1367
1496	3557767	3557330	1602851	1603284	438	434	reverse	1.18494e-121	1366
1497	3313870	3314325	1890309	1890763	456	455	forward	1.18494e-121	1366
1498	10005282	10006359	10272421	10273495	1078	1075	forward	1.18494e-121	1366
1499	2980316	2981129	530525	531338	814	814	forward	1.48607e-121	1365
1500	6112129	6111706	6643437	6643857	424	421	reverse	5.78228e-121	1359
1501	6354995	6354252	656605	657348	744	744	reverse	9.09465e-121	1357
1502	3623163	3622748	1602874	1603286	416	413	reverse	9.09465e-121	1357
1503	8965979	8966809	6045520	6046345	831	826	forward	9.09465e-121	1357
1504	3557293	3557745	7992630	7993079	453	450	forward	9.09465e-121	1357
1505	10843516	10842336	699895	701124	1181	1230	reverse	1.43045e-120	1355
1506	3289420	3288245	7169159	7170346	1176	1188	reverse	1.43045e-120	1355
1507	2717157	2718063	5142928	5143821	907	894	forward	1.43045e-120	1355
1508	7879726	7879166	883880	884441	561	562	reverse	1.79398e-120	1354
1509	5606831	5607256	7992658	7993080	426	423	forward	1.79398e-120	1354
1510	10867415	10866519	7909266	7910162	897	897	reverse	2.24988e-120	1353
1511	8005174	8003959	8444632	8445869	1216	1238	reverse	2.24988e-120	1353
1512	7544709	7543542	2595132	2596296	1168	1165	reverse	2.82165e-120	1352
1513	8554087	8553543	9217885	9218438	545	554	reverse	2.82165e-120	1352
1514	3274968	3274108	3487554	3488414	861	861	reverse	5.56588e-120	1349
1515	7714613	7713907	9479719	9480370	707	652	reverse	5.56588e-120	1349
1516	5213110	5212405	6484097	6484802	706	706	reverse	6.98035e-120	1348
1517	10522916	10523560	609441	610085	645	645	forward	6.98035e-120	1348
1518	2468430	2469260	2380157	2380984	831	828	forward	6.98035e-120	1348
1519	9440468	9441389	3076517	3077438	922	922	forward	6.98035e-120	1348
1520	3622732	3623163	3198218	3198648	432	431	forward	6.98035e-120	1348
1521	10611663	10610374	138120	139418	1290	1299	reverse	2.16568e-119	1343
1522	9949421	9949026	6313876	6314271	396	396	reverse	2.16568e-119	1343
1523	7307632	7306332	11278204	11279504	1301	1301	reverse	2.71605e-119	1342
1524	559371	560082	1768653	1769388	712	736	forward	2.71605e-119	1342
1525	10219200	10219690	6002147	6002634	491	488	forward	2.71605e-119	1342
1526	9631682	9632603	4372520	4373441	922	922	forward	3.40629e-119	1341
1527	5606837	5607260	3198235	3198655	424	421	forward	4.27193e-119	1340
1528	4015940	4016740	7926851	7927645	801	795	forward	4.27193e-119	1340
1529	6931353	6929973	6321613	6322974	1381	1362	reverse	5.35757e-119	1339
1530	3635716	3634914	10458434	10459223	803	790	reverse	5.35757e-119	1339
1531	3557325	3557742	3198233	3198647	418	415	forward	5.35757e-119	1339
1532	11097270	11095957	7225170	7226455	1314	1286	reverse	6.7191e-119	1338
1533	3579900	3580691	7950137	7950928	792	792	forward	1.05681e-118	1336
1534	10605178	10604408	144481	145254	771	774	reverse	1.32538e-118	1335
1535	3739977	3740591	5272432	5273043	615	612	forward	1.32538e-118	1335
1536	7699233	7699901	9461600	9462268	669	669	forward	1.66221e-118	1334
1537	8867894	8868697	10068986	10069783	804	798	forward	2.08463e-118	1333
1538	2375040	2374582	1424325	1424780	459	456	reverse	2.6144e-118	1332
1539	5607259	5606839	1602867	1603285	421	419	reverse	2.6144e-118	1332
1540	2477323	2476632	1935465	1936156	692	692	reverse	4.11205e-118	1330
1541	9273063	9273972	10470076	10470986	910	911	forward	4.11205e-118	1330
1542	1416318	1417987	10563364	10565042	1670	1679	forward	5.15706e-118	1329
1543	9458939	9459820	10806687	10807565	882	879	forward	5.15706e-118	1329
1544	896546	898714	10331712	10333892	2169	2181	forward	6.46764e-118	1328
1545	11118871	11117973	7199201	7200099	899	899	reverse	8.11128e-118	1327
1546	7690020	7691219	4230259	4231454	1200	1196	forward	1.27578e-117	1325
1547	315479	316373	1260797	1261700	895	904	forward	1.6e-117	1324
1548	4129470	4128495	7961039	7961976	976	938	reverse	2.00661e-117	1323
1549	7004338	7003000	5429990	5431344	1339	1355	reverse	2.51655e-117	1322
1550	9709557	9710419	4458557	4459422	863	866	forward	2.51655e-117	1322
1551	9848136	9847138	6778268	6779266	999	999	reverse	3.15609e-117	1321
1552	7489544	7490349	4898346	4899144	806	799	forward	3.15609e-117	1321
1553	10698249	10697574	7738402	7739077	676	676	reverse	3.95816e-117	1320
1554	419276	420206	7784015	7784935	931	921	forward	3.95816e-117	1320
1555	3013999	3013293	598877	599583	707	707	reverse	6.22558e-117	1318
1556	4094363	4093763	7895366	7895965	601	600	reverse	9.7919e-117	1316
1557	4641933	4642805	1502006	1502882	873	877	forward	9.7919e-117	1316
1558	5932859	5933761	9040797	9041696	903	900	forward	9.7919e-117	1316
1559	9994197	9995333	10257401	10258539	1137	1139	forward	9.7919e-117	1316
1560	63992	62637	8439083	8440441	1356	1359	reverse	1.54012e-116	1314
1561	10433102	10431500	475069	476650	1603	1582	reverse	2.42237e-116	1312
1562	8021277	8020473	4999254	5000056	805	803	reverse	3.03797e-116	1311
1563	9651599	9652207	4390408	4391016	609	609	forward	3.03797e-116	1311
1564	10952573	10951433	9620839	9621985	1141	1147	reverse	3.81002e-116	1310
1565	5240906	5239915	11344607	11345589	992	983	reverse	4.77827e-116	1309
1566	1658179	1657008	10424782	10425947	1172	1166	reverse	5.99259e-116	1308
1567	3960206	3959278	11087672	11088615	929	944	reverse	7.5155e-116	1307
1568	4481361	4482396	4232520	4233555	1036	1036	forward	9.42543e-116	1306
1569	9266341	9267026	10463422	10464108	686	687	forward	1.18207e-115	1305
1570	8575666	8574604	4862471	4863539	1063	1069	reverse	1.85922e-115	1303
1571	10635577	10636640	1686136	1687193	1064	1058	forward	2.33171e-115	1302
1572	3799096	3799577	10681867	10682351	482	485	forward	2.92428e-115	1301
1573	3217302	3216368	2294188	2295122	935	935	reverse	3.66743e-115	1300
1574	1592546	1593667	10022652	10023767	1122	1116	forward	3.66743e-115	1300
1575	3906019	3907419	9973660	9975062	1401	1403	forward	4.59944e-115	1299
1576	4887060	4886200	8811263	8812123	861	861	reverse	5.76831e-115	1298
1577	6561728	6562700	3832628	3833603	973	976	forward	9.07268e-115	1296
1578	1688235	1688972	4379300	4380036	738	737	forward	9.07268e-115	1296
1579	6507455	6508366	10448669	10449580	912	912	forward	9.07268e-115	1296
1580	315216	314710	4921366	4921873	507	508	reverse	1.13783e-114	1295
1581	11125412	11124708	7193341	7194045	705	705	reverse	1.13783e-114	1295
1582	8976806	8978067	194481	195883	1262	1403	forward	1.13783e-114	1295
1583	1245294	1244762	373402	373937	533	536	reverse	1.427e-114	1294
1584	170574	169370	5020953	5022157	1205	1205	reverse	1.427e-114	1294
1585	9396012	9395266	9719171	9719906	747	736	reverse	1.427e-114	1294
1586	3655165	3654406	10440207	10440963	760	757	reverse	1.427e-114	1294
1587	1116925	1117876	5069341	5070295	952	955	forward	1.427e-114	1294
1588	7896174	7897801	5302734	5304322	1628	1589	forward	1.427e-114	1294
1589	8939948	8940792	8301453	8302309	845	857	forward	1.427e-114	1294
1590	4833864	4832742	2643260	2644379	1123	1120	reverse	1.78964e-114	1293
1591	4725690	4724604	2789832	2790915	1087	1084	reverse	1.78964e-114	1293
1592	5434255	5434831	9794276	9794852	577	577	forward	1.78964e-114	1293
1593	10082025	10081368	6788191	6788844	658	654	reverse	2.24445e-114	1292
1594	10214238	10215243	6003451	6004456	1006	1006	forward	2.81483e-114	1291
1595	2268702	2269353	2465064	2465715	652	652	forward	3.53018e-114	1290
1596	4877138	4876448	8822649	8823342	691	694	reverse	4.42731e-114	1289
1597	10377903	10377004	9777919	9778818	900	900	reverse	4.42731e-114	1289
1598	3207650	3206831	10211576	10212410	820	835	reverse	4.42731e-114	1289
1599	9949427	9949025	6643455	6643857	403	403	reverse	5.55243e-114	1288
1600	3886853	3886176	7143126	7143804	678	679	reverse	5.55243e-114	1288
1601	1500085	1499557	8616977	8617503	529	527	reverse	5.55243e-114	1288
1602	250978	250133	9948785	9949630	846	846	reverse	5.55243e-114	1288
1603	5966684	5965747	10987499	10988433	938	935	reverse	5.55243e-114	1288
1604	1612143	1611185	7807860	7808818	959	959	reverse	8.73313e-114	1286
1605	10540021	10541149	393990	395157	1129	1168	forward	8.73313e-114	1286
1606	10649460	10650210	5874943	5875693	751	751	forward	8.73313e-114	1286
1607	2041060	2043176	5894694	5896791	2117	2098	forward	1.09525e-113	1285
1608	10148202	10148612	9824698	9825101	411	404	forward	1.09525e-113	1285
1609	8985798	8987651	206942	208792	1854	1851	forward	1.37359e-113	1284
1610	1409121	1408042	8850629	8851728	1080	1100	reverse	2.16045e-113	1282
1611	7141631	7142329	5571871	5572569	699	699	forward	2.70949e-113	1281
1612	6699494	6698788	6678902	6679608	707	707	reverse	3.39806e-113	1280
1613	3284919	3284207	7172611	7173323	713	713	reverse	3.39806e-113	1280
1614	5361603	5361198	9824699	9825101	406	403	reverse	3.39806e-113	1280
1615	2233043	2233897	2213246	2214103	855	858	forward	4.26161e-113	1279
1616	2107973	2109060	9106091	9107175	1088	1085	forward	5.34463e-113	1278
1617	4846822	4846035	2628364	2629151	788	788	reverse	6.70287e-113	1277
1618	7451525	7452500	4983762	4984731	976	970	forward	8.40629e-113	1276
1619	1671248	1672382	10408400	10409535	1135	1136	forward	8.40629e-113	1276
1620	836931	835652	969227	970506	1280	1280	reverse	1.05426e-112	1275
1621	10680623	10681046	1143728	1144149	424	422	forward	1.05426e-112	1275
1622	2778590	2779478	6092025	6092907	889	883	forward	1.32218e-112	1274
1623	5624423	5623653	1584789	1585546	771	758	reverse	1.65819e-112	1273
1624	712450	711532	10533617	10534535	919	919	reverse	1.65819e-112	1273
1625	9386930	9387935	5996003	5997000	1006	998	forward	1.65819e-112	1273
1626	4044459	4043243	7958003	7959191	1217	1189	reverse	2.07959e-112	1272
1627	8494019	8493289	4157778	4158508	731	731	reverse	2.60808e-112	1271
1628	759600	760549	11026553	11027502	950	950	forward	2.60808e-112	1271
1629	7972497	7971762	157560	158298	736	739	reverse	3.27088e-112	1270
1630	7667340	7666942	4379622	4380020	399	399	reverse	3.27088e-112	1270
1631	5034791	5034300	7503452	7503956	492	505	reverse	3.27088e-112	1270
1632	1260420	1259652	356891	357662	769	772	reverse	4.10212e-112	1269
1633	5346121	5345313	259637	260454	809	818	reverse	5.1446e-112	1268
1634	7637622	7636993	1965137	1965766	630	630	reverse	6.45201e-112	1267
1635	1464758	1464203	9573350	9573905	556	556	reverse	6.45201e-112	1267
1636	242611	241545	9957683	9958744	1067	1062	reverse	6.45201e-112	1267
1637	4842686	4841623	2633208	2634210	1064	1003	reverse	1.0148e-111	1265
1638	4184793	4185453	7427577	7428238	661	662	forward	1.0148e-111	1265
1639	306281	307061	1251726	1252506	781	781	forward	1.2727e-111	1264
1640	7159904	7160662	5596203	5596954	759	752	forward	1.59613e-111	1263
1641	7992841	7991673	8343198	8344365	1169	1168	reverse	2.00176e-111	1262
1642	9318598	9319136	180019	180557	539	539	forward	2.00176e-111	1262
1643	2415672	2415155	3405834	3406354	518	521	reverse	2.51047e-111	1261
1644	246937	246221	9953122	9953832	717	711	reverse	2.51047e-111	1261
1645	2333657	2332358	2830074	2831350	1300	1277	reverse	3.14847e-111	1260
1646	10404073	10403626	10819659	10820106	448	448	reverse	3.14847e-111	1260
1647	4340172	4340905	5218892	5219628	734	737	forward	3.14847e-111	1260
1648	6910102	6909104	1369227	1370219	999	993	reverse	3.9486e-111	1259
1649	4088910	4088384	8932992	8933518	527	527	reverse	3.9486e-111	1259
1650	2203215	2202551	2246177	2246841	665	665	reverse	4.95206e-111	1258
1651	2192163	2190813	2258466	2259813	1351	1348	reverse	4.95206e-111	1258
1652	1336712	1335241	2739087	2740549	1472	1463	reverse	6.21054e-111	1257
1653	10399557	10398402	10382340	10383495	1156	1156	reverse	6.21054e-111	1257
1654	11004804	11005355	881145	881693	552	549	forward	6.21054e-111	1257
1655	757991	758750	11025089	11025848	760	760	forward	6.21054e-111	1257
1656	1014163	1013185	10169705	10170614	979	910	reverse	7.78884e-111	1256
1657	595476	596075	8218428	8219027	600	600	forward	9.76824e-111	1255
1658	3052658	3052004	2088946	2089600	655	655	reverse	1.22507e-110	1254
1659	2214977	2215891	2195819	2196731	915	913	forward	1.22507e-110	1254
1660	9705316	9706177	4454654	4455514	862	861	forward	1.22507e-110	1254
1661	2452466	2451656	3368040	3368842	811	803	reverse	1.5364e-110	1253
1662	3251738	3250759	9009854	9010826	980	973	reverse	1.92684e-110	1252
1663	518796	519637	8592156	8593003	842	848	forward	1.92684e-110	1252
1664	6293157	6295069	1351696	1353608	1913	1913	forward	2.41652e-110	1251
1665	9664028	9665189	4404695	4405856	1162	1162	forward	3.03064e-110	1250
1666	1405316	1404140	8854677	8855856	1177	1180	reverse	9.40266e-110	1245
1667	1584761	1585644	2962072	2962952	884	881	forward	9.40266e-110	1245
1668	11176141	11175630	6225171	6225679	512	509	reverse	1.17922e-109	1244
1669	7726509	7726887	1144539	1144917	379	379	forward	1.4789e-109	1243
1670	5736318	5737016	6548981	6549680	699	700	forward	1.4789e-109	1243
1671	10123812	10125071	6809237	6810511	1260	1275	forward	1.4789e-109	1243
1672	3593907	3592754	7869802	7870964	1154	1163	reverse	2.32608e-109	1241
1673	726015	726901	10987046	10987932	887	887	forward	2.32608e-109	1241
1674	2898425	2897671	6166837	6167581	755	745	reverse	2.91721e-109	1240
1675	9965695	9966370	2328926	2329601	676	676	forward	2.91721e-109	1240
1676	6867647	6866593	10625964	10627012	1055	1049	reverse	3.65857e-109	1239
1677	4102127	4101300	7885716	7886543	828	828	reverse	5.75438e-109	1237
1678	1559708	1560299	2939169	2939765	592	597	forward	5.75438e-109	1237
1679	2124799	2123876	805824	806749	924	926	reverse	7.21675e-109	1236
1680	273379	272547	9927656	9928488	833	833	reverse	7.21675e-109	1236
1681	10195871	10197033	774367	775506	1163	1140	forward	7.21675e-109	1236
1682	1542401	1543705	2899504	2900817	1305	1314	forward	7.21675e-109	1236
1683	3927795	3928731	5291034	5291971	937	938	forward	7.21675e-109	1236
1684	1246936	1246066	372097	372967	871	871	reverse	9.05076e-109	1235
1685	4848822	4847941	2626498	2627370	882	873	reverse	9.05076e-109	1235
1686	4659294	4659979	2015916	2016600	686	685	forward	9.05076e-109	1235
1687	1564009	1564797	2943428	2944216	789	789	forward	9.05076e-109	1235
1688	7178050	7177335	3297029	3297756	716	728	reverse	1.13509e-108	1234
1689	7959181	7958643	174543	175081	539	539	reverse	1.42355e-108	1233
1690	3467760	3466931	6712985	6713808	830	824	reverse	2.23902e-108	1231
1691	4789257	4789853	2676833	2677434	597	602	forward	2.23902e-108	1231
1692	10853688	10854144	11072348	11072804	457	457	forward	2.23902e-108	1231
1693	5270144	5269185	235136	236100	960	965	reverse	2.80803e-108	1230
1694	8479931	8478745	5660307	5661496	1187	1190	reverse	2.80803e-108	1230
1695	2723911	2724380	5149353	5149822	470	470	forward	2.80803e-108	1230
1696	203786	204622	9292730	9293566	837	837	forward	3.52165e-108	1229
1697	8878019	8878495	10078479	10078956	477	478	forward	3.52165e-108	1229
1698	5313827	5314719	10061709	10062601	893	893	forward	4.41661e-108	1228
1699	3886176	3886853	11301723	11302401	678	679	forward	5.53902e-108	1227
1700	3886824	3886178	7685417	7686063	647	647	reverse	6.94666e-108	1226
1701	6528408	6529242	1078503	1079348	835	846	forward	6.94666e-108	1226
1702	7235380	7234940	7420204	7420644	441	441	reverse	8.71203e-108	1225
1703	7451311	7452469	11151459	11152617	1159	1159	forward	8.71203e-108	1225
1704	5658719	5657537	1426390	1427593	1183	1204	reverse	1.0926e-107	1224
1705	3693627	3693180	1438362	1438812	448	451	reverse	1.0926e-107	1224
1706	520493	520134	3470812	3471171	360	360	reverse	1.0926e-107	1224
1707	3096227	3097143	9029195	9030107	917	913	forward	1.0926e-107	1224
1708	8487602	8487250	4163485	4163840	353	356	reverse	1.37027e-107	1223
1709	10063099	10062130	7655415	7656381	970	967	reverse	1.37027e-107	1223
1710	7300504	7301537	9044679	9045715	1034	1037	forward	1.37027e-107	1223
1711	6022773	6021978	6297171	6297974	796	804	reverse	1.7185e-107	1222
1712	7973400	7974303	3107842	3108769	904	928	forward	1.7185e-107	1222
1713	10594253	10595225	5392628	5393601	973	974	forward	1.7185e-107	1222
1714	7855424	7854875	2532386	2532929	550	544	reverse	2.15523e-107	1221
1715	8352006	8351081	8121923	8122854	926	932	reverse	2.15523e-107	1221
1716	10681020	10680620	9365559	9365959	401	401	reverse	2.15523e-107	1221
1717	9641785	9642176	4379632	4380023	392	392	forward	2.15523e-107	1221
1718	4624910	4625803	1485190	1486120	894	931	forward	2.70294e-107	1220
1719	7726096	7725690	9365551	9365954	407	404	reverse	4.25132e-107	1218
1720	7785190	7785635	454613	455056	446	444	forward	4.25132e-107	1218
1721	5887337	5888123	1179163	1179949	787	787	forward	4.25132e-107	1218
1722	5694158	5695333	4124151	4125332	1176	1182	forward	4.25132e-107	1218
1723	5338376	5338754	350662	351042	379	381	forward	5.33172e-107	1217
1724	2101500	2102227	5183626	5184353	728	728	forward	5.33172e-107	1217
1725	4505683	4504911	11119778	11120553	773	776	reverse	6.68668e-107	1216
1726	3429959	3430738	3747627	3748406	780	780	forward	6.68668e-107	1216
1727	4500257	4499167	11125561	11126654	1091	1094	reverse	8.38598e-107	1215
1728	4067326	4068214	4230548	4231439	889	892	forward	1.31899e-106	1213
1729	7701273	7702129	9464211	9465065	857	855	forward	1.31899e-106	1213
1730	810454	811310	9698038	9698894	857	857	forward	1.31899e-106	1213
1731	8616191	8614951	8343121	8344352	1241	1232	reverse	1.65419e-106	1212
1732	5017028	5017914	11062235	11063121	887	887	forward	1.65419e-106	1212
1733	2089270	2090607	5171845	5173173	1338	1329	forward	2.07457e-106	1211
1734	10112555	10112940	8871607	8871992	386	386	forward	2.07457e-106	1211
1735	628886	628044	241638	242478	843	841	reverse	2.60178e-106	1210
1736	3925918	3926499	5289293	5289874	582	582	forward	2.60178e-106	1210
1737	4436529	4437567	10186978	10188016	1039	1039	forward	2.60178e-106	1210
1738	5797049	5797977	8787206	8788137	929	932	forward	3.26298e-106	1209
1739	5543777	5544641	1607290	1608154	865	865	forward	4.09221e-106	1208
1740	9366890	9367644	3443404	3444158	755	755	forward	4.09221e-106	1208
1741	5518879	5519948	8741125	8742292	1070	1168	forward	5.13217e-106	1207
1742	7122905	7121848	5560423	5561487	1058	1065	reverse	6.43643e-106	1206
1743	5403425	5401914	8238691	8240193	1512	1503	reverse	6.43643e-106	1206
1744	3865442	3864700	10002277	10003019	743	743	reverse	6.43643e-106	1206
1745	10596242	10597097	5394614	5395475	856	862	forward	8.07213e-106	1205
1746	7096396	7097360	5527849	5528810	965	962	forward	8.07213e-106	1205
1747	10853679	10854120	11072363	11072804	442	442	forward	8.07213e-106	1205
1748	10288939	10288104	9584171	9585048	836	878	reverse	1.26962e-105	1203
1749	2084244	2085347	5161928	5163020	1104	1093	forward	1.26962e-105	1203
1750	10467153	10466542	5107546	5108157	612	612	reverse	1.59228e-105	1202
1751	7249333	7248354	7405557	7406531	980	975	reverse	1.59228e-105	1202
1752	10090535	10090111	10728677	10729104	425	428	reverse	1.59228e-105	1202
1753	7158755	7159163	7420205	7420613	409	409	forward	1.99693e-105	1201
1754	10508291	10509258	8461801	8462777	968	977	forward	1.99693e-105	1201
1755	1296831	1295984	5085564	5086417	848	854	reverse	2.50441e-105	1200
1756	7725690	7726088	1143730	1144125	399	396	forward	2.50441e-105	1200
1757	2597469	2598434	3599327	3600282	966	956	forward	2.50441e-105	1200
1758	6642935	6641791	7052280	7053429	1145	1150	reverse	3.14086e-105	1199
1759	9496945	9496568	7531550	7531929	378	380	reverse	3.14086e-105	1199
1760	4214270	4212809	8872732	8874193	1462	1462	reverse	3.14086e-105	1199
1761	5597718	5598355	1306961	1307597	638	637	forward	3.14086e-105	1199
1762	4575854	4576617	7852078	7852840	764	763	forward	3.14086e-105	1199
1763	3083101	3081933	2074105	2075273	1169	1169	reverse	3.93906e-105	1198
1764	1440825	1441875	4232558	4233608	1051	1051	forward	3.93906e-105	1198
1765	2919073	2918376	3031522	3032219	698	698	reverse	4.9401e-105	1197
1766	10112555	10112940	8616976	8617361	386	386	forward	4.9401e-105	1197
1767	10305540	10306450	9049421	9050328	911	908	forward	4.9401e-105	1197
1768	5176520	5177939	6433594	6434981	1420	1388	forward	6.19554e-105	1196
1769	2149672	2148637	780883	781918	1036	1036	reverse	7.77003e-105	1195
1770	919812	920208	2757156	2757549	397	394	forward	7.77003e-105	1195
1771	11003277	11004057	879745	880519	781	775	forward	9.74464e-105	1194
1772	314720	315169	1260034	1260483	450	450	forward	1.22211e-104	1193
1773	4457625	4456653	4601871	4602846	973	976	reverse	1.53268e-104	1192
1774	4846413	4844784	2628773	2630399	1630	1627	reverse	1.92219e-104	1191
1775	1500092	1499589	8871601	8872104	504	504	reverse	1.92219e-104	1191
1776	2709053	2709742	5128088	5128777	690	690	forward	1.92219e-104	1191
1777	10013236	10013931	10281897	10282589	696	693	forward	1.92219e-104	1191
1778	11023524	11022530	2978901	2979892	995	992	reverse	2.41068e-104	1190
1779	7080569	7081468	5511418	5512317	900	900	forward	2.41068e-104	1190
1780	11180420	11181129	9872384	9873099	710	716	forward	2.41068e-104	1190
1781	7969792	7968804	160437	161416	989	980	reverse	3.02331e-104	1189
1782	5853437	5852579	7798713	7799600	859	888	reverse	3.02331e-104	1189
1783	1721666	1722461	1528266	1529061	796	796	forward	3.02331e-104	1189
1784	7466728	7465999	542982	543703	730	722	reverse	3.79164e-104	1188
1785	9496930	9496568	3470813	3471175	363	363	reverse	3.79164e-104	1188
1786	8866568	8865632	10066881	10067814	937	934	reverse	4.75521e-104	1187
1787	6583555	6582810	1674084	1674779	746	696	reverse	5.96367e-104	1186
1788	3765555	3764889	7143136	7143802	667	667	reverse	5.96367e-104	1186
1789	4722303	4721368	2792900	2793835	936	936	reverse	7.47923e-104	1185
1790	4181589	4182673	7424474	7425558	1085	1085	forward	7.47923e-104	1185
1791	4867220	4866322	184220	185116	899	897	reverse	9.37995e-104	1184
1792	1717852	1717488	4163483	4163849	365	367	reverse	9.37995e-104	1184
1793	11108404	11107119	7212440	7213749	1286	1310	reverse	9.37995e-104	1184
1794	9194865	9195575	7148355	7149065	711	711	forward	9.37995e-104	1184
1795	2697660	2696841	1514037	1514856	820	820	reverse	1.17637e-103	1183
1796	6440848	6439917	10911955	10912886	932	932	reverse	1.17637e-103	1183
1797	10647010	10647380	9330775	9331144	371	370	forward	1.17637e-103	1183
1798	3901562	3902364	9968904	9969713	803	810	forward	1.17637e-103	1183
1799	6549584	6549110	6585763	6586238	475	476	reverse	1.85025e-103	1181
1800	9944172	9943001	6648910	6650090	1172	1181	reverse	1.85025e-103	1181
1801	9167441	9166490	7135814	7136805	952	992	reverse	1.85025e-103	1181
1802	10853688	10854166	11072327	11072802	479	476	forward	1.85025e-103	1181
1803	10557757	10558643	409624	410513	887	890	forward	2.32046e-103	1180
1804	5107737	5108750	3987937	3988953	1014	1017	forward	2.32046e-103	1180
1805	7859667	7859079	2528692	2529280	589	589	reverse	2.91016e-103	1179
1806	6706462	6705706	2657300	2658056	757	757	reverse	2.91016e-103	1179
1807	10162043	10160487	8747678	8749252	1557	1575	reverse	2.91016e-103	1179
1808	3176238	3175169	6918906	6919978	1070	1073	reverse	4.57725e-103	1177
1809	4858539	4857506	8038000	8039033	1034	1034	reverse	4.57725e-103	1177
1810	4759831	4759413	5321313	5321734	419	422	reverse	7.19932e-103	1175
1811	7451077	7451911	4983314	4984148	835	835	forward	7.19932e-103	1175
1812	7158758	7159175	5595212	5595629	418	418	forward	7.19932e-103	1175
1813	4393789	4394782	8343493	8344486	994	994	forward	7.19932e-103	1175
1814	8087203	8088036	8350436	8351264	834	829	forward	7.19932e-103	1175
1815	3886853	3886188	8421056	8421719	666	664	reverse	1.13234e-102	1173
1816	1241190	1241739	3124660	3125104	550	445	forward	1.13234e-102	1173
1817	8846789	8847505	7332090	7332806	717	717	forward	1.13234e-102	1173
1818	10563584	10564510	8629581	8630507	927	927	forward	1.13234e-102	1173
1819	3764889	3765555	11301725	11302391	667	667	forward	1.13234e-102	1173
1820	6696849	6696026	6681401	6682201	824	801	reverse	1.42011e-102	1172
1821	6656402	6657232	2306031	2306862	831	832	forward	1.42011e-102	1172
1822	5359681	5360530	9825677	9826529	850	853	forward	2.23362e-102	1170
1823	4614400	4615122	1473907	1474567	723	661	forward	2.80125e-102	1169
1824	5660207	5660821	3124660	3125170	615	511	forward	2.80125e-102	1169
1825	682429	681051	3348596	3349976	1379	1381	reverse	3.51314e-102	1168
1826	3261620	3260716	3501314	3502214	905	901	reverse	3.51314e-102	1168
1827	9633840	9635073	4375037	4376262	1234	1226	forward	3.51314e-102	1168
1828	10603717	10602893	145933	146760	825	828	reverse	4.40594e-102	1167
1829	520491	520104	7531568	7531953	388	386	reverse	4.40594e-102	1167
1830	8850258	8849561	9862286	9862992	698	707	reverse	4.40594e-102	1167
1831	100101	101039	1324564	1325502	939	939	forward	4.40594e-102	1167
1832	8487250	8487599	1521499	1521851	350	353	forward	4.40594e-102	1167
1833	3415624	3416341	4390445	4391162	718	718	forward	4.40594e-102	1167
1834	202193	203014	9290545	9291366	822	822	forward	4.40594e-102	1167
1835	4070250	4069350	34018	34912	901	895	reverse	5.52563e-102	1166
1836	3583844	3584784	6228284	6229233	941	950	forward	5.52563e-102	1166
1837	9897826	9896438	10738982	10740370	1389	1389	reverse	6.92988e-102	1165
1838	8738473	8739146	9256768	9257441	674	674	forward	6.92988e-102	1165
1839	2976750	2977613	527019	527874	864	856	forward	1.36696e-101	1162
1840	911908	912799	5313199	5314075	892	877	forward	1.36696e-101	1162
1841	7380076	7379129	2498456	2499402	948	947	reverse	1.71435e-101	1161
1842	4651188	4650337	2745414	2746265	852	852	reverse	2.15002e-101	1160
1843	2341515	2340201	2823636	2824944	1315	1309	reverse	2.15002e-101	1160
1844	9818854	9818518	8314470	8314806	337	337	reverse	2.15002e-101	1160
1845	199009	199482	9289284	9289762	474	479	forward	2.15002e-101	1160
1846	10061425	10061023	10728664	10729065	403	402	reverse	2.69641e-101	1159
1847	271721	273286	4133281	4134846	1566	1566	forward	2.69641e-101	1159
1848	5749884	5750812	4698281	4699209	929	929	forward	2.69641e-101	1159
1849	1190083	1188952	3232958	3234086	1132	1129	reverse	3.38166e-101	1158
1850	633518	632760	2354410	2355162	759	753	reverse	4.24105e-101	1157
1851	4759831	4759435	2757156	2757552	397	397	reverse	4.24105e-101	1157
1852	7514678	7515326	430600	431248	649	649	forward	4.24105e-101	1157
1853	865003	864430	938728	939302	574	575	reverse	5.31883e-101	1156
1854	6520707	6519966	9363608	9364367	742	760	reverse	5.31883e-101	1156
1855	10471175	10470470	5102705	5103416	706	712	reverse	6.67052e-101	1155
1856	5544640	5543684	6110676	6111628	957	953	reverse	8.36572e-101	1154
1857	3452381	3453340	3770863	3771822	960	960	forward	8.36572e-101	1154
1858	4075659	4077329	8957561	8959240	1671	1680	forward	8.36572e-101	1154
1859	1717130	1716550	4164596	4165175	581	580	reverse	1.04917e-100	1153
1860	7773037	7772605	4921435	4921867	433	433	reverse	1.04917e-100	1153
1861	3074647	3073922	2082109	2082834	726	726	reverse	1.3158e-100	1152
1862	3765555	3764899	8421066	8421719	657	654	reverse	1.3158e-100	1152
1863	8288340	8287286	10999370	11000421	1055	1052	reverse	1.3158e-100	1152
1864	434113	432861	3403150	3404408	1253	1259	reverse	1.65019e-100	1151
1865	9526019	9526993	1344480	1345460	975	981	forward	2.06956e-100	1150
1866	6705703	6706405	5335146	5335848	703	703	forward	2.06956e-100	1150
1867	5703842	5704660	4134139	4134957	819	819	forward	2.5955e-100	1149
1868	5952705	5953511	5798425	5799240	807	816	forward	2.5955e-100	1149
1869	199471	198978	3170601	3171101	494	501	reverse	3.2551e-100	1148
1870	47310	46158	8872732	8873884	1153	1153	reverse	3.2551e-100	1148
1871	4919390	4921023	6243134	6244743	1634	1610	forward	3.2551e-100	1148
1872	8287208	8288009	8074442	8075243	802	802	forward	3.2551e-100	1148
1873	4345047	4346199	8872732	8873884	1153	1153	forward	3.2551e-100	1148
1874	5247478	5246673	928008	928798	806	791	reverse	4.08232e-100	1147
1875	3033116	3032565	2110472	2111020	552	549	reverse	4.08232e-100	1147
1876	10966945	10965948	8189069	8190066	998	998	reverse	4.08232e-100	1147
1877	1039137	1038685	10151556	10152009	453	454	reverse	4.08232e-100	1147
1878	1310864	1311746	334060	334942	883	883	forward	4.08232e-100	1147
1879	725351	726325	10986388	10987356	975	969	forward	4.08232e-100	1147
1880	888670	887949	4620295	4621016	722	722	reverse	5.11977e-100	1146
1881	11122201	11121457	7197626	7198374	745	749	reverse	6.42088e-100	1145
1882	1137361	1138419	5958172	5959199	1059	1028	forward	6.42088e-100	1145
1883	1744247	1743009	3270496	3271746	1239	1251	reverse	8.05263e-100	1144
1884	6043390	6042500	6282374	6283264	891	891	reverse	8.05263e-100	1144
1885	10090536	10090075	7657295	7657758	462	464	reverse	8.05263e-100	1144
1886	1245298	1244760	9217879	9218426	539	548	reverse	8.05263e-100	1144
1887	4826760	4827911	5339939	5341087	1152	1149	forward	8.05263e-100	1144
1888	6642902	6641693	7054733	7055936	1210	1204	reverse	1.00991e-99	1143
1889	1717496	1717848	1521497	1521852	353	356	forward	1.00991e-99	1143
1890	2044282	2044938	5897981	5898671	657	691	forward	1.00991e-99	1143
1891	10191634	10191099	3124663	3125095	536	433	reverse	1.58843e-99	1141
1892	6714379	6715334	6669244	6670202	956	959	forward	1.58843e-99	1141
1893	8493320	8494064	1528291	1529035	745	745	forward	1.9921e-99	1140
1894	1423209	1424064	10570961	10571819	856	859	forward	1.9921e-99	1140
1895	3681776	3680926	1448885	1449732	851	848	reverse	3.13327e-99	1138
1896	10015476	10014525	8771698	8772650	952	953	reverse	3.13327e-99	1138
1897	86431	85411	5009579	5010599	1021	1021	reverse	4.92816e-99	1136
1898	6310016	6311200	6377482	6378667	1185	1186	forward	4.92816e-99	1136
1899	5316289	5317047	10064258	10064953	759	696	forward	4.92816e-99	1136
1900	6393968	6393159	10974250	10975059	810	810	reverse	6.18057e-99	1135
1901	948735	949727	5353129	5354115	993	987	forward	7.75126e-99	1134
1902	5283417	5284237	10033114	10033931	821	818	forward	7.75126e-99	1134
1903	7109755	7110455	5539265	5540009	701	745	forward	9.7211e-99	1133
1904	10061413	10060962	7657295	7657755	452	461	reverse	1.21915e-98	1132
1905	9780370	9779538	4261054	4261883	833	830	reverse	1.52898e-98	1131
1906	3027272	3026488	2115700	2116484	785	785	reverse	1.91755e-98	1130
1907	5974898	5976013	8094607	8095716	1116	1110	forward	1.91755e-98	1130
1908	2842933	2842242	6136003	6136682	692	680	reverse	2.40486e-98	1129
1909	443264	442469	1670086	1670881	796	796	reverse	3.01601e-98	1128
1910	9782365	9781569	3903923	3904722	797	800	reverse	3.01601e-98	1128
1911	3765536	3764874	7685416	7686083	663	668	reverse	3.01601e-98	1128
1912	7772609	7773037	1260034	1260462	429	429	forward	3.01601e-98	1128
1913	107980	108880	7688344	7689247	901	904	forward	3.01601e-98	1128
1914	379060	378216	1053716	1054554	845	839	reverse	3.78248e-98	1127
1915	10388315	10387327	9764292	9765283	989	992	reverse	4.74373e-98	1126
1916	5660758	5660207	377420	377866	552	447	reverse	5.94926e-98	1125
1917	6051541	6050561	6309504	6310475	981	972	reverse	5.94926e-98	1125
1918	4492722	4491777	7694091	7695030	946	940	reverse	7.46116e-98	1124
1919	6709678	6710677	6664459	6665445	1000	987	forward	7.46116e-98	1124
1920	10010219	10011327	7678797	7679899	1109	1103	forward	7.46116e-98	1124
1921	6955306	6956269	8522423	8523356	964	934	forward	7.46116e-98	1124
1922	10853653	10854072	11072388	11072804	420	417	forward	7.46116e-98	1124
1923	2340557	2339257	2824588	2825894	1301	1307	reverse	9.35728e-98	1123
1924	1518593	1518126	3170605	3171078	468	474	reverse	9.35728e-98	1123
1925	6535027	6534230	11151852	11152649	798	798	reverse	9.35728e-98	1123
1926	5324784	5325884	9833709	9834803	1101	1095	forward	9.35728e-98	1123
1927	2561655	2560943	3570139	3570851	713	713	reverse	1.17353e-97	1122
1928	7267698	7266545	7388092	7389245	1154	1154	reverse	1.17353e-97	1122
1929	9660899	9661560	4401412	4402073	662	662	forward	1.17353e-97	1122
1930	1515900	1514882	3173414	3174420	1019	1007	reverse	1.47176e-97	1121
1931	10599508	10600416	5396371	5397303	909	933	forward	1.47176e-97	1121
1932	110643	109724	4210125	4211041	920	917	reverse	1.84578e-97	1120
1933	1518123	1518589	9289269	9289741	467	473	forward	1.84578e-97	1120
1934	151207	150531	590139	590803	677	665	reverse	2.31485e-97	1119
1935	6535693	6534677	11151181	11152202	1017	1022	reverse	2.31485e-97	1119
1936	493241	495139	7459579	7461473	1899	1895	forward	2.31485e-97	1119
1937	2729131	2729912	365103	365887	782	785	forward	2.90313e-97	1118
1938	3791662	3792329	4468761	4469463	668	703	forward	2.90313e-97	1118
1939	3803416	3804484	8015586	8016651	1069	1066	forward	2.90313e-97	1118
1940	7204234	7203158	1492696	1493774	1077	1079	reverse	3.64091e-97	1117
1941	10714628	10713696	7718725	7719654	933	930	reverse	3.64091e-97	1117
1942	244629	243993	9955441	9956074	637	634	reverse	3.64091e-97	1117
1943	1201091	1202253	3304440	3305590	1163	1151	forward	4.56619e-97	1116
1944	5846752	5847718	10186864	10187830	967	967	forward	5.72661e-97	1115
1945	5623510	5622499	1585825	1586833	1012	1009	reverse	7.18192e-97	1114
1946	4932837	4932163	3798681	3799356	675	676	reverse	9.00708e-97	1113
1947	2023648	2024486	5882568	5883409	839	842	forward	9.00708e-97	1113
1948	3999642	4000231	7914879	7915464	590	586	forward	9.00708e-97	1113
1949	1241730	1241190	377431	377866	541	436	reverse	1.12961e-96	1112
1950	3546527	3545542	6695034	6696016	986	983	reverse	1.41668e-96	1111
1951	8554089	8553554	373402	373937	536	536	reverse	1.7767e-96	1110
1952	10191099	10191634	377431	377863	536	433	forward	1.7767e-96	1110
1953	6873631	6873013	10620008	10620622	619	615	reverse	2.22822e-96	1109
1954	2175962	2176609	832283	832930	648	648	forward	2.22822e-96	1109
1955	4474705	4475246	9273459	9274000	542	542	forward	2.22822e-96	1109
1956	3744777	3743950	5285723	5286555	828	833	reverse	2.79448e-96	1108
1957	9475858	9475276	10849376	10849958	583	583	reverse	2.79448e-96	1108
1958	9221244	9220711	7158531	7159066	534	536	reverse	3.50465e-96	1107
1959	5034342	5034734	5264145	5264537	393	393	forward	3.50465e-96	1107
1960	5759751	5761176	4697785	4699210	1426	1426	forward	4.3953e-96	1106
1961	6539631	6540823	9620821	9622009	1193	1189	forward	4.3953e-96	1106
1962	534589	533846	1799373	1800114	744	742	reverse	5.51228e-96	1105
1963	2472465	2473074	2383799	2384408	610	610	forward	5.51228e-96	1105
1964	7737888	7738865	8585487	8586470	978	984	forward	5.51228e-96	1105
1965	8974499	8975208	192098	192801	710	704	forward	6.91314e-96	1104
1966	10682174	10682980	3875807	3876601	807	795	forward	6.91314e-96	1104
1967	7529525	7528822	4913510	4914219	704	710	reverse	1.08733e-95	1102
1968	5394441	5393778	8245812	8246469	664	658	reverse	1.08733e-95	1102
1969	4407933	4408921	164038	165009	989	972	forward	1.08733e-95	1102
1970	4752972	4752331	2763093	2763734	642	642	reverse	1.36366e-95	1101
1971	3286859	3286394	10151534	10151999	466	466	reverse	1.71021e-95	1100
1972	6934425	6933405	6318570	6319593	1021	1024	reverse	2.14483e-95	1099
1973	8016782	8017588	164218	165009	807	792	forward	2.6899e-95	1098
1974	10614281	10614967	11293500	11294191	687	692	forward	2.6899e-95	1098
1975	5762796	5763481	4990313	4990990	686	678	forward	3.37349e-95	1097
1976	972738	973656	5229033	5229948	919	916	forward	3.37349e-95	1097
1977	369640	369111	1062336	1062869	530	534	reverse	4.2308e-95	1096
1978	9733321	9732726	8788772	8789367	596	596	reverse	4.2308e-95	1096
1979	497480	498373	7463666	7464557	894	892	forward	4.2308e-95	1096
1980	843404	842793	963355	963966	612	612	reverse	5.30598e-95	1095
1981	10577122	10577617	8719988	8720482	496	495	forward	5.30598e-95	1095
1982	373618	372986	1060176	1060811	633	636	reverse	6.65441e-95	1094
1983	6736158	6737186	5253040	5254068	1029	1029	forward	6.65441e-95	1094
1984	2513008	2513791	3519573	3520356	784	784	forward	8.34551e-95	1093
1985	1247490	1246555	371540	372478	936	939	reverse	1.04664e-94	1092
1986	2433341	2432401	3388929	3389868	941	940	reverse	1.04664e-94	1092
1987	10480221	10479576	4115282	4115927	646	646	reverse	1.31262e-94	1091
1988	2694758	2693978	1517122	1517908	781	787	reverse	1.6462e-94	1090
1989	3416341	3415623	1964991	1965709	719	719	reverse	1.6462e-94	1090
1990	6535034	6534203	4987600	4988425	832	826	reverse	1.6462e-94	1090
1991	4768496	4767731	6660370	6661135	766	766	reverse	2.06456e-94	1089
1992	8820461	8821759	7302346	7303635	1299	1290	forward	2.06456e-94	1089
1993	5847384	5848115	10187496	10188227	732	732	forward	2.58923e-94	1088
1994	8996424	8995713	6219794	6220499	712	706	reverse	3.24723e-94	1087
1995	2133382	2132587	797535	798330	796	796	reverse	4.07246e-94	1086
1996	3269322	3268585	3493032	3493769	738	738	reverse	4.07246e-94	1086
1997	6499728	6498717	3818596	3819604	1012	1009	reverse	4.07246e-94	1086
[truncated: 2,507 more rows]

## Sheet: S4
	Positions							Statistics
#	S. japonicus (Sj)		S. octosporus (So)		Sj	So	sense	Evalue	score
	Start	Stop	Start	Stop	size	size
1	8160097	8166016	8505071	8511230	5920	6160	forward	0	17403
2	8918591	8911494	7518807	7525898	7098	7092	reverse	0	16997
3	8168621	8174504	8505071	8511230	5884	6160	forward	0	16524
4	8177110	8182979	8505071	8511217	5870	6147	forward	0	15683
5	8160097	8166016	8525967	8532042	5920	6076	forward	0	14639
6	8168621	8174504	8525967	8532042	5884	6076	forward	0	14452
7	8177110	8182979	8525967	8532029	5870	6063	forward	0	14045
8	8185616	8191145	8526213	8532042	5530	5830	forward	0	13649
9	7485477	7479255	5623629	5629860	6223	6232	reverse	0	13352
10	2283644	2290317	2693381	2700081	6674	6701	forward	0	13107
11	1332438	1339449	2222528	2229545	7012	7018	forward	0	12649
12	6400504	6394979	7601502	7607033	5526	5532	reverse	0	12528
13	5139007	5145674	3162579	3169267	6668	6689	forward	0	12395
14	8185616	8191145	8505319	8511230	5530	5912	forward	0	12209
15	4520546	4515148	260087	265491	5399	5405	reverse	0	11418
16	7364804	7358565	1037979	1044206	6240	6228	reverse	0	11405
17	10366112	10361232	5923852	5928741	4881	4890	reverse	0	11149
18	4803303	4808372	6317593	6322697	5070	5105	forward	0	10640
19	7553804	7550103	2799155	2802859	3702	3705	reverse	0	10071
20	272851	268179	6566366	6571039	4673	4674	reverse	0	9726
21	1377442	1374130	9425955	9429256	3313	3302	reverse	0	9553
22	389848	394666	5591838	5596647	4819	4810	forward	0	9215
23	2421675	2416790	10274526	10279381	4886	4856	reverse	0	8460
24	9182399	9179741	1068603	1071255	2659	2653	reverse	0	8403
25	10272470	10275254	1068537	1071316	2785	2780	forward	0	8396
26	3399963	3396676	10560431	10563716	3288	3286	reverse	0	8254
27	6731949	6734523	5070165	5072738	2575	2574	forward	0	8181
28	9796769	9794240	5070209	5072738	2530	2530	reverse	0	8137
29	2957606	2963969	9037212	9043708	6364	6497	forward	0	8118
30	9796862	9794228	11093228	11095859	2635	2632	reverse	0	8064
31	5682019	5678478	2599905	2603460	3542	3556	reverse	0	8045
32	6731991	6734534	11093318	11095858	2544	2541	forward	0	8022
33	4660059	4653274	6362720	6369486	6786	6767	reverse	0	7676
34	8168621	8171852	8515693	8518807	3232	3115	forward	0	7575
35	437682	432469	3377939	3383155	5214	5217	reverse	0	7568
36	3293518	3297024	3945909	3949407	3507	3499	forward	0	7556
37	3024803	3021971	2329672	2332513	2833	2842	reverse	0	7532
38	10985645	10988920	8230692	8233961	3276	3270	forward	0	7515
39	3549759	3555970	8056722	8063100	6212	6379	forward	0	7476
40	1743007	1750294	5501140	5508400	7288	7261	forward	0	7402
41	8164170	8166709	8519631	8522159	2540	2529	forward	0	7380
42	8177112	8180361	8515694	8518807	3250	3114	forward	0	7365
43	5700046	5704201	10981927	10986094	4156	4168	forward	0	7312
44	9627549	9630797	4241704	4244952	3249	3249	forward	0	7304
45	9483506	9478495	7477042	7482053	5012	5012	reverse	0	7299
46	6476555	6472773	1920775	1924559	3783	3785	reverse	0	7281
47	8185409	8188549	8515711	8518807	3141	3097	forward	0	7079
48	8172662	8174506	8519629	8521465	1845	1837	forward	0	7013
49	2487839	2483590	1316791	1321047	4250	4257	reverse	0	7011
50	8164164	8165996	4643827	4645647	1833	1821	forward	0	6931
51	8172662	8174484	4643831	4645647	1823	1817	forward	0	6897
52	8189329	8191642	8519631	8521984	2314	2354	forward	0	6855
53	5613767	5610577	1819360	1822553	3191	3194	reverse	0	6782
54	691156	695730	10198281	10202699	4575	4419	forward	0	6715
55	8181161	8182979	8519631	8521450	1819	1820	forward	0	6651
56	8181157	8182958	4643829	4645632	1802	1804	forward	0	6645
57	1729397	1733376	6202426	6206403	3980	3978	forward	0	6557
58	2180531	2184885	9364826	9368991	4355	4166	forward	0	6556
59	5193307	5195803	3219274	3221774	2497	2501	forward	0	6530
60	8189323	8191125	4643827	4645647	1803	1821	forward	0	6525
61	5222028	5218162	3241679	3245533	3867	3855	reverse	0	6510
62	3329263	3332036	2060278	2063051	2774	2774	forward	0	6459
63	1287665	1290832	8846752	8849922	3168	3171	forward	0	6383
64	4983635	4985577	2053715	2055656	1943	1942	forward	0	6373
65	7194801	7192007	10148842	10151621	2795	2780	reverse	0	6282
66	10263645	10265765	1052635	1054749	2121	2115	forward	0	6277
67	9290891	9292852	320273	322229	1962	1957	forward	0	6226
68	5872416	5875598	10750580	10753762	3183	3183	forward	0	6221
69	10683993	10682147	2053717	2055563	1847	1847	reverse	0	6171
70	9924061	9920524	792376	795910	3538	3535	reverse	0	6153
71	5706447	5708684	10988507	10990744	2238	2238	forward	0	6143
72	5498233	5492898	547896	553219	5336	5324	reverse	0	6131
73	1532058	1528977	6524090	6527118	3082	3029	reverse	0	6109
74	10690478	10686698	3321718	3325509	3781	3792	reverse	0	6086
75	791690	794612	2353652	2356562	2923	2911	forward	0	6067
76	7477620	7475700	320286	322203	1921	1918	reverse	0	5928
77	2528524	2531484	10410658	10413627	2961	2970	forward	0	5904
78	8160099	8162569	8515694	8518135	2471	2442	forward	0	5901
79	7053458	7056033	5288815	5291400	2576	2586	forward	0	5872
80	5704536	5700920	260108	263769	3617	3662	reverse	0	5860
81	9182390	9179740	5288826	5291473	2651	2648	reverse	0	5836
82	10272540	10275208	5288821	5291486	2669	2666	forward	0	5771
83	7516995	7520164	8970039	8973211	3170	3173	forward	0	5770
84	9290899	9292873	9063648	9065596	1975	1949	forward	0	5744
85	7477596	7475700	9063657	9065547	1897	1891	reverse	0	5692
86	7613324	7616202	2125129	2128004	2879	2876	forward	0	5636
87	6293104	6295940	3126766	3129606	2837	2841	forward	0	5539
88	7053463	7056106	1068609	1071254	2644	2646	forward	0	5512
89	10535278	10538023	8925002	8927738	2746	2737	forward	0	5503
90	2519681	2522206	10400903	10403432	2526	2530	forward	0	5484
91	10239131	10236204	4395721	4398652	2928	2932	reverse	0	5437
92	4997506	4995254	9269162	9271423	2253	2262	reverse	0	5424
93	423813	421526	3392234	3394542	2288	2309	reverse	0	5401
94	4512300	4509205	269206	272304	3096	3099	reverse	0	5364
95	5206852	5203878	3257431	3260408	2975	2978	reverse	0	5363
96	7408655	7405810	6140029	6142880	2846	2852	reverse	0	5334
97	10832504	10835815	11258109	11261408	3312	3300	forward	0	5329
98	8557466	8555214	768907	771159	2253	2253	reverse	0	5321
99	10188767	10186140	9998748	10001375	2628	2628	reverse	0	5309
100	1704591	1701082	7021361	7024888	3510	3528	reverse	0	5277
101	3749465	3745148	5101210	5105310	4318	4101	reverse	0	5255
102	6042838	6039882	3054616	3057581	2957	2966	reverse	0	5243
103	4926294	4924107	10648689	10650894	2188	2206	reverse	0	5227
104	2212865	2210614	2442220	2444471	2252	2252	reverse	0	5151
105	3506197	3501611	2233426	2237988	4587	4563	reverse	0	5106
106	10749465	10746872	6831099	6833692	2594	2594	reverse	0	5095
107	7147167	7149743	5389913	5392489	2577	2577	forward	0	5062
108	7017723	7013530	5227533	5231720	4194	4188	reverse	0	5030
109	7261395	7258750	4155946	4158592	2646	2647	reverse	0	5005
110	7256585	7257954	4846447	4847816	1370	1370	forward	0	4981
111	4516645	4520540	10982581	10986443	3896	3863	forward	0	4977
112	173820	172421	4846414	4847817	1400	1404	reverse	0	4965
113	7258044	7256585	4159397	4160859	1460	1463	reverse	0	4954
114	3156610	3154381	3716591	3718820	2230	2230	reverse	0	4953
115	172420	173807	4159488	4160878	1388	1391	forward	0	4926
116	6516463	6513658	3333071	3335885	2806	2815	reverse	0	4924
117	11017819	11013925	8991286	8995177	3895	3892	reverse	0	4921
118	173807	172421	882469	883858	1387	1390	reverse	0	4919
119	7256570	7257954	882470	883857	1385	1388	forward	0	4917
120	5822865	5820317	1737167	1739718	2549	2552	reverse	0	4891
121	546697	548957	1977845	1980108	2261	2264	forward	0	4879
122	8873907	8875962	6715233	6717280	2056	2048	forward	0	4865
123	7850843	7848179	2750249	2752915	2665	2667	reverse	0	4859
124	1139702	1142203	6145703	6148202	2502	2500	forward	0	4825
125	7602958	7600246	10498667	10501379	2713	2713	reverse	0	4797
126	10162294	10160435	10683852	10685708	1860	1857	reverse	0	4785
127	2667353	2669370	3105529	3107543	2018	2015	forward	0	4779
128	3245627	3247400	3926028	3927801	1774	1774	forward	0	4756
129	6287689	6290149	3121017	3123468	2461	2452	forward	0	4750
130	8361639	8359109	8186392	8188927	2531	2536	reverse	0	4741
131	9705316	9708526	4327972	4331193	3211	3222	forward	0	4731
132	3041823	3039732	2312909	2315001	2092	2093	reverse	0	4693
133	6379411	6376881	7592172	7594711	2531	2540	reverse	0	4688
134	1549814	1547699	6505548	6507664	2116	2117	reverse	0	4683
135	10942517	10946438	6940229	6944149	3922	3921	forward	0	4628
136	2447555	2445403	10247979	10250149	2153	2171	reverse	0	4587
137	9384159	9386233	6178511	6180584	2075	2074	forward	0	4585
138	5704126	5700985	6566354	6569489	3142	3136	reverse	0	4582
139	8765162	8768599	4121180	4124600	3438	3421	forward	0	4572
140	3037517	3035774	2317363	2319106	1744	1744	reverse	0	4560
141	10644322	10645868	882431	883986	1547	1556	forward	0	4530
142	11168300	11165944	3005314	3007688	2357	2375	reverse	0	4528
143	2031153	2027149	9990555	9994611	4005	4057	reverse	0	4527
144	7747001	7749047	8640276	8642322	2047	2047	forward	0	4525
145	10644375	10645727	4846447	4847817	1353	1371	forward	0	4518
146	7812582	7810223	2787321	2789674	2360	2354	reverse	0	4428
147	2560566	2558895	10444354	10446025	1672	1672	reverse	0	4411
148	9429909	9432090	1718527	1720727	2182	2201	forward	0	4396
149	8382270	8380068	9384923	9387132	2203	2210	reverse	0	4386
150	6620041	6622134	3864060	3866147	2094	2088	forward	0	4374
151	269719	272846	10982866	10986002	3128	3137	forward	0	4372
152	4519796	4517135	6566632	6569284	2662	2653	reverse	0	4368
153	7695639	7698170	1012973	1015525	2532	2553	forward	0	4363
154	5865173	5866905	7899367	7901099	1733	1733	forward	0	4341
155	4794463	4796807	6308725	6311060	2345	2336	forward	0	4332
156	3101684	3099144	2265322	2267858	2541	2537	reverse	0	4315
157	1488234	1489762	1094345	1095864	1529	1520	forward	0	4310
158	7900813	7903504	6980709	6983424	2692	2716	forward	0	4298
159	3112036	3113763	7416497	7418227	1728	1731	forward	0	4296
160	6047567	6045755	3049738	3051551	1813	1814	reverse	0	4287
161	977976	980131	5055864	5058019	2156	2156	forward	0	4283
162	7383923	7385719	9113198	9115000	1797	1803	forward	0	4276
163	4130901	4133782	11301209	11304097	2882	2889	forward	0	4266
164	7240243	7237284	4174033	4176977	2960	2945	reverse	0	4239
165	6296959	6298998	3130960	3133006	2040	2047	forward	0	4236
166	10279815	10278093	1135456	1137178	1723	1723	reverse	0	4230
167	5729465	5732694	3308363	3311573	3230	3211	forward	0	4228
168	6329362	6327241	9212709	9214808	2122	2100	reverse	0	4227
169	8357466	8355831	8190108	8191743	1636	1636	reverse	0	4211
170	10239233	10236873	8970027	8972378	2361	2352	reverse	0	4210
171	10645729	10644359	4159487	4160878	1371	1392	reverse	0	4194
172	8519895	8521651	9547620	9549376	1757	1757	forward	0	4184
173	9478991	9481931	6566537	6569471	2941	2935	forward	0	4182
174	10253678	10251494	8431689	8433878	2185	2190	reverse	0	4172
175	7319813	7317700	4447631	4449747	2114	2117	reverse	0	4169
176	2943617	2941183	1662343	1664783	2435	2441	reverse	0	4154
177	3301203	3302534	3954271	3955603	1332	1333	forward	0	4154
178	1433525	1435801	7226840	7229118	2277	2279	forward	0	4150
179	5066155	5064004	10629432	10631575	2152	2144	reverse	0	4147
180	8544278	8541602	782275	784955	2677	2681	reverse	0	4128
181	8804679	8803000	4095662	4097341	1680	1680	reverse	0	4122
182	3949546	3946224	10898092	10901342	3323	3251	reverse	0	4105
183	1381829	1379888	729227	731168	1942	1942	reverse	0	4099
184	9531293	9534068	5757696	5760462	2776	2767	forward	0	4097
185	11184986	11183681	3954271	3955579	1306	1309	reverse	0	4095
186	6463351	6461508	1934900	1936744	1844	1845	reverse	0	4089
187	8318601	8317394	8172021	8173230	1208	1210	reverse	0	4087
188	9479071	9481586	260826	263341	2516	2516	forward	0	4077
189	935343	937400	5160586	5162637	2058	2052	forward	0	4074
190	915518	919141	5137079	5140690	3624	3612	forward	0	4059
191	7890312	7893223	5116696	5119628	2912	2933	forward	0	4046
192	5584546	5586329	9605101	9606879	1784	1779	forward	0	4040
193	2674065	2675896	9558398	9560228	1832	1831	forward	0	4039
194	2314401	2311524	9095589	9098456	2878	2868	reverse	0	4024
195	875702	874310	3892392	3893786	1393	1395	reverse	0	4018
196	2916686	2914799	1688836	1690724	1888	1889	reverse	0	4004
197	5664881	5663182	2618577	2620272	1700	1696	reverse	0	3992
198	7328416	7330019	74556	76159	1604	1604	forward	0	3979
199	6491568	6488594	4353758	4356751	2975	2994	reverse	0	3977
200	2009555	2011058	9950415	9951918	1504	1504	forward	0	3947
201	5974900	5977254	9909072	9911408	2355	2337	forward	0	3945
202	9614454	9616433	4225318	4227312	1980	1995	forward	0	3941
203	2128664	2126178	9330253	9332744	2487	2492	reverse	0	3929
204	1065873	1064444	2919691	2921120	1430	1430	reverse	0	3885
205	7325315	7327473	65863	68025	2159	2163	forward	0	3883
206	9224237	9222006	3921248	3923464	2232	2217	reverse	0	3878
207	1581251	1582984	1614538	1616271	1734	1734	forward	0	3878
208	9546932	9545762	7287822	7288992	1171	1171	reverse	0	3865
209	3016126	3013289	2338408	2341225	2838	2818	reverse	0	3857
210	5655553	5658719	2628683	2631849	3167	3167	forward	0	3855
211	8624170	8625715	1324756	1326301	1546	1546	forward	0	3854
212	3290890	3292246	3942852	3944203	1357	1352	forward	0	3843
213	271969	268749	261457	264680	3221	3224	reverse	0	3831
214	9620077	9622030	4231787	4233791	1954	2005	forward	0	3820
215	9312244	9313902	9535447	9537111	1659	1665	forward	0	3820
216	541342	539751	2015106	2016697	1592	1592	reverse	0	3819
217	580587	581790	3954271	3955473	1204	1203	forward	0	3816
218	9545723	9546929	10655394	10656607	1207	1214	forward	0	3802
219	5631333	5630018	1800143	1801460	1316	1318	reverse	0	3795
220	296322	294680	6541745	6543387	1643	1643	reverse	0	3793
221	6830962	6833369	1869036	1871431	2408	2396	forward	0	3792
222	10023808	10026147	6933816	6936158	2340	2343	forward	0	3775
223	559377	561484	1991601	1993732	2108	2132	forward	0	3773
224	781285	779444	1374006	1375839	1842	1834	reverse	0	3770
225	9788101	9784698	11101639	11105060	3404	3422	reverse	0	3766
226	5869693	5871061	10748196	10749566	1369	1371	forward	0	3766
227	10477944	10476565	10969871	10971247	1380	1377	reverse	0	3764
228	10813115	10815354	4782462	4784706	2240	2245	forward	0	3758
229	4117848	4115694	7947976	7950130	2155	2155	reverse	0	3756
230	7644436	7642659	2170500	2172277	1778	1778	reverse	0	3750
231	4636530	4637729	6027353	6028559	1200	1207	forward	0	3748
232	7532274	7530381	4732636	4734544	1894	1909	reverse	0	3731
233	7517091	7519347	4395724	4397983	2257	2260	forward	0	3715
234	8943007	8941270	8084927	8086665	1738	1739	reverse	0	3709
235	593055	595233	8279073	8281254	2179	2182	forward	0	3701
236	4809859	4808730	6027411	6028540	1130	1130	reverse	0	3695
237	4851057	4847805	6248751	6252013	3253	3263	reverse	0	3694
238	988083	989575	8317618	8319110	1493	1493	forward	0	3694
239	7931974	7930643	3844467	3845798	1332	1332	reverse	0	3693
240	8344634	8343283	8202579	8203930	1352	1352	reverse	0	3692
241	8413155	8411110	6657501	6659544	2046	2044	reverse	0	3686
242	2199030	2197385	2460680	2462328	1646	1649	reverse	0	3683
243	625593	623366	8781834	8784008	2228	2175	reverse	0	3676
244	4628799	4630657	6019752	6021610	1859	1859	forward	0	3657
245	7668327	7670074	982163	983898	1748	1736	forward	0	3654
246	803732	805899	1384104	1386263	2168	2160	forward	0	3650
247	8548946	8547340	778752	780349	1607	1598	reverse	0	3645
248	3571813	3573655	8079429	8081271	1843	1843	forward	0	3643
249	10327191	10328733	625028	626564	1543	1537	forward	0	3627
250	2924854	2921744	1681575	1684648	3111	3074	reverse	0	3616
251	606220	602647	2202439	2206119	3574	3681	reverse	0	3616
252	2807285	2808657	1972480	1973855	1373	1376	forward	0	3607
253	9238603	9236654	6088094	6090040	1950	1947	reverse	0	3604
254	7336418	7334065	9854767	9857094	2354	2328	reverse	0	3602
255	5938541	5941179	9871783	9874424	2639	2642	forward	0	3601
256	6704620	6703297	3452889	3454209	1324	1321	reverse	0	3586
257	1723730	1721581	11007921	11010067	2150	2147	reverse	0	3583
258	4630860	4633666	6021828	6024622	2807	2795	forward	0	3582
259	8720348	8718994	6771115	6772469	1355	1355	reverse	0	3573
260	5761198	5759750	4812979	4814427	1449	1449	reverse	0	3571
261	10661145	10663588	899745	902189	2444	2445	forward	0	3568
262	9502500	9500693	1441680	1443464	1808	1785	reverse	0	3557
263	10851740	10854761	7704664	7707640	3022	2977	forward	0	3549
264	3426080	3424717	10812776	10814141	1364	1366	reverse	0	3543
265	8088209	8086475	9257645	9259369	1735	1725	reverse	0	3539
266	1645109	1646985	4422219	4424105	1877	1887	forward	0	3538
267	7608892	7607709	10492688	10493871	1184	1184	reverse	0	3537
268	9960913	9963117	2534966	2537143	2205	2178	forward	0	3532
269	2649403	2651758	10712517	10714878	2356	2362	forward	0	3532
270	8362890	8364292	8222005	8223413	1403	1409	forward	0	3529
271	6791342	6789903	7157023	7158473	1440	1451	reverse	0	3515
272	8042247	8044141	530406	532294	1895	1889	forward	0	3507
273	5700949	5703527	7478571	7481144	2579	2574	forward	0	3501
274	1605265	1603804	7891237	7892698	1462	1462	reverse	0	3492
275	8501021	8502183	10090375	10091537	1163	1163	forward	0	3477
276	2371457	2369300	5960932	5963098	2158	2167	reverse	0	3476
277	10470841	10469074	4928563	4930331	1768	1769	reverse	0	3473
278	10258874	10257276	4380474	4382075	1599	1602	reverse	0	3470
279	9481192	9478490	10983623	10986337	2703	2715	reverse	0	3468
280	2068273	2069630	11346653	11348010	1358	1358	forward	0	3468
281	7207613	7205443	10136266	10138441	2171	2176	reverse	0	3460
282	9275808	9277609	7111025	7112826	1802	1802	forward	0	3457
283	8693432	8695115	2395135	2396815	1684	1681	forward	0	3454
284	9522985	9524071	5746204	5747289	1087	1086	forward	0	3442
285	270086	272651	7478972	7481531	2566	2560	forward	0	3438
286	6082609	6081113	2527034	2528530	1497	1497	reverse	0	3420
287	4142664	4144224	4812904	4814454	1561	1551	forward	0	3416
288	5155513	5157245	3179777	3181410	1733	1634	forward	0	3398
289	4194488	4195525	4197984	4199019	1038	1036	forward	0	3394
290	7806387	7805384	4198015	4199018	1004	1004	reverse	0	3393
291	9329130	9330140	4198008	4199018	1011	1011	forward	0	3393
292	4386146	4387149	4198015	4199018	1004	1004	forward	0	3386
293	155629	152696	4865866	4868780	2934	2915	reverse	0	3385
294	8106989	8108663	11270111	11271785	1675	1675	forward	0	3384
295	2398547	2396608	10300773	10302715	1940	1943	reverse	0	3374
296	55794	53099	11052821	11055571	2696	2751	reverse	0	3374
297	68994	69997	4198015	4199018	1004	1004	forward	0	3371
298	7988825	7989828	4198015	4199018	1004	1004	forward	0	3365
299	5749387	5750846	4800474	4801933	1460	1460	forward	0	3365
300	9330627	9331631	4198008	4199012	1005	1005	forward	0	3362
301	3983142	3984511	7752181	7753564	1370	1384	forward	0	3357
302	9334073	9332396	8620459	8622127	1678	1669	reverse	0	3354
303	4504121	4502441	7756571	7758263	1681	1693	reverse	0	3352
304	2952205	2950037	1646330	1648482	2169	2153	reverse	0	3341
305	8744402	8745665	132373	133632	1264	1260	forward	0	3336
306	1195430	1192634	5422329	5425122	2797	2794	reverse	0	3333
307	5260945	5259858	5746210	5747297	1088	1088	reverse	0	3331
308	9693313	9695295	4315349	4317337	1983	1989	forward	0	3324
309	1495755	1493815	1106336	1108273	1941	1938	reverse	0	3320
310	7181775	7180647	10164004	10165137	1129	1134	reverse	0	3318
311	4679524	4681903	1418345	1420736	2380	2392	forward	0	3312
312	4700974	4702806	6340478	6342216	1833	1739	forward	0	3306
313	5759661	5761210	4803981	4805526	1550	1546	forward	0	3298
314	5364466	5362805	1514286	1515939	1662	1654	reverse	0	3293
315	891130	889473	4491500	4493157	1658	1658	reverse	0	3293
316	8012201	8013692	4812935	4814426	1492	1492	forward	0	3290
317	238245	241004	879345	882087	2760	2743	forward	0	3283
318	4142664	4144195	11312625	11314156	1532	1532	forward	0	3278
319	874464	875659	7157263	7158458	1196	1196	forward	0	3276
320	9170566	9171688	10164003	10165124	1123	1122	forward	0	3265
321	10400059	10396947	7458228	7461329	3113	3102	reverse	0	3259
322	5042546	5041197	5480873	5482222	1350	1350	reverse	0	3246
323	10683860	10682170	320505	322192	1691	1688	reverse	0	3243
324	7924510	7922714	3852652	3854476	1797	1825	reverse	0	3228
325	6064196	6065898	2517366	2519068	1703	1703	forward	0	3228
326	39105	40921	3775627	3777443	1817	1817	forward	0	3228
327	1096186	1097153	7287810	7288773	968	964	forward	0	3228
328	2556482	2558140	10439479	10441132	1659	1654	forward	0	3228
329	1097153	1096176	10655659	10656633	978	975	reverse	0	3217
330	7823203	7821505	2777927	2779625	1699	1699	reverse	0	3215
331	6594514	6595700	956271	957460	1187	1190	forward	0	3213
332	4983770	4985460	320505	322192	1691	1688	forward	0	3201
333	4053203	4054865	11283124	11284780	1663	1657	forward	0	3190
334	5508809	5505972	537194	540079	2838	2886	reverse	0	3188
335	455826	457494	736852	738523	1669	1672	forward	0	3188
336	8042376	8044118	8186590	8188332	1743	1743	forward	0	3187
337	8952791	8951602	467737	468929	1190	1193	reverse	0	3184
338	1768485	1766717	6197871	6199757	1769	1887	reverse	0	3183
339	10016117	10017284	6922739	6923903	1168	1165	forward	0	3180
340	5750812	5749386	4813002	4814428	1427	1427	reverse	0	3178
341	2286803	2288921	10561526	10563653	2119	2128	forward	0	3173
342	3198980	3196758	6858433	6860632	2223	2200	reverse	0	3168
343	5867720	5868861	7903053	7904194	1142	1142	forward	0	3167
344	7181777	7180681	4516479	4517575	1097	1097	reverse	0	3166
345	5761279	5759635	11312625	11314272	1645	1648	reverse	0	3166
346	9355220	9356479	3452887	3454149	1260	1263	forward	0	3163
347	5029676	5027838	11229071	11230909	1839	1839	reverse	0	3160
348	9777952	9775717	11113452	11115687	2236	2236	reverse	0	3154
349	3884150	3882330	6623013	6624830	1821	1818	reverse	0	3152
350	8361394	8359702	530584	532270	1693	1687	reverse	0	3145
351	6854522	6853077	7280381	7281821	1446	1441	reverse	0	3143
352	5790700	5793371	10867069	10869569	2672	2501	forward	0	3138
353	9170570	9171661	4516484	4517575	1092	1092	forward	0	3129
354	3848101	3846439	3295510	3297172	1663	1663	reverse	2.24622e-294	3122
355	3353903	3352429	9264622	9266090	1475	1469	reverse	2.24622e-294	3122
356	1543296	1541084	6515414	6517633	2213	2220	reverse	1.37498e-293	3114
357	2885386	2882234	2957623	2960769	3153	3147	reverse	2.16276e-293	3112
358	4891361	4890270	372176	373267	1092	1092	reverse	2.71247e-293	3111
359	9837241	9838608	7346195	7347559	1368	1365	forward	4.26654e-293	3109
360	7344598	7342693	9846157	9848029	1906	1873	reverse	6.711e-293	3107
361	7941757	7938978	3881878	3884662	2780	2785	reverse	2.61169e-292	3101
362	8702743	8701372	7018778	7020149	1372	1372	reverse	6.46166e-292	3097
363	6924858	6923075	3099488	3101271	1784	1784	reverse	2.00504e-291	3092
364	6789918	6791110	3892435	3893627	1193	1193	forward	2.00504e-291	3092
365	7819101	7817507	2781674	2783268	1595	1595	reverse	9.78617e-291	3085
366	5750812	5749387	11312729	11314154	1426	1426	reverse	1.22735e-290	3084
367	608159	606757	2200395	2201797	1403	1403	reverse	7.51301e-290	3076
368	10573707	10575225	290677	292195	1519	1519	forward	7.51301e-290	3076
369	3097408	3095527	2271020	2272901	1882	1882	reverse	1.18175e-289	3074
370	6743795	6745477	5083095	5084756	1683	1662	forward	2.9238e-289	3070
371	448003	445877	1887905	1890023	2127	2119	reverse	5.76786e-289	3067
372	3142927	3144579	6491863	6493511	1653	1649	forward	2.24465e-288	3061
373	6603657	6601460	6995875	6998019	2198	2145	reverse	3.5307e-288	3059
374	1440303	1441867	7232323	7233887	1565	1565	forward	1.37402e-287	3053
375	5994133	5992628	648854	650353	1506	1500	reverse	8.41085e-287	3045
376	2749328	2750597	2824861	2826139	1270	1279	forward	2.08096e-286	3041
377	1661665	1662780	7037298	7038413	1116	1116	forward	2.08096e-286	3041
378	7609823	7612622	2121691	2124523	2800	2833	forward	6.45716e-286	3036
379	5999032	6000781	9922810	9924565	1750	1756	forward	1.27382e-285	3033
380	9688343	9690058	4309150	4310889	1716	1740	forward	2.00364e-285	3031
381	9291113	9292815	2053834	2055539	1703	1706	forward	2.5129e-285	3030
382	4837668	4836438	6263904	6265128	1231	1225	reverse	7.79747e-285	3025
383	469110	470466	5013505	5014858	1357	1354	forward	9.77934e-285	3024
384	3744777	3742672	5106088	5108198	2106	2111	reverse	1.53823e-284	3022
385	5361199	5362369	10697854	10699015	1171	1162	forward	2.41954e-284	3020
386	5453250	5454560	5945765	5947075	1311	1311	forward	3.03451e-284	3019
387	5915339	5916867	587183	588690	1529	1508	forward	3.66438e-283	3008
388	10148611	10147456	10697854	10699013	1156	1160	reverse	5.76384e-283	3006
389	2667395	2669234	320355	322191	1840	1837	forward	7.22883e-283	3005
390	4590518	4591831	5984382	5985695	1314	1314	forward	1.42605e-282	3002
391	8225383	8223908	8551899	8553380	1476	1482	reverse	3.39715e-281	2988
392	5012301	5013732	7692168	7693599	1432	1432	forward	8.40499e-281	2984
393	5254390	5253321	685390	686456	1070	1067	reverse	3.27093e-280	2978
394	7447080	7444726	7357310	7359667	2355	2358	reverse	5.14497e-280	2976
395	9733338	9732265	685386	686456	1074	1071	reverse	6.45265e-280	2975
396	5770745	5768992	8596355	8598037	1754	1683	reverse	6.45265e-280	2975
397	3238240	3239531	10337242	10338533	1292	1292	forward	8.09271e-280	2974
398	10683928	10682172	9063787	9065534	1757	1748	reverse	2.51115e-279	2969
399	7724184	7722827	5493925	5495282	1358	1358	reverse	1.22564e-278	2962
400	9331632	9330592	8623400	8624443	1041	1044	reverse	1.1801e-277	2952
401	8013690	8012209	4804069	4805550	1482	1482	reverse	3.66183e-277	2947
402	1323400	1324828	2214738	2216161	1429	1424	forward	1.13626e-276	2942
403	5442028	5444043	1495417	1497432	2016	2016	forward	3.52578e-276	2937
404	4983702	4985458	9063787	9065534	1757	1748	forward	2.15824e-275	2929
405	652790	651437	2578258	2579611	1354	1354	reverse	1.32113e-274	2921
406	4144189	4142768	4804070	4805491	1422	1422	reverse	2.07806e-274	2919
407	9330128	9329095	8623404	8624443	1034	1040	reverse	3.26865e-274	2917
408	869033	867559	9459598	9461062	1475	1465	reverse	1.53608e-272	2900
409	2499311	2501467	10378953	10381079	2157	2127	forward	2.41616e-272	2898
410	430763	428843	3384900	3386817	1921	1918	reverse	3.80048e-272	2896
411	4387137	4386104	8623404	8624443	1034	1040	reverse	5.97791e-272	2894
412	5749391	5750823	4804070	4805502	1433	1433	forward	1.17928e-271	2891
413	4188883	4190625	4192701	4194457	1743	1757	forward	1.85493e-271	2889
414	8112507	8111005	11275946	11277448	1503	1503	reverse	2.91769e-271	2887
415	10873968	10872805	7975673	7976837	1164	1165	reverse	3.65927e-271	2886
416	69985	68952	8623404	8624443	1034	1040	reverse	1.78601e-270	2879
417	2582520	2584142	10460073	10461698	1623	1626	forward	4.41883e-270	2875
418	8946256	8944024	8757165	8759326	2233	2162	reverse	6.95054e-270	2873
419	7805396	7806411	8623404	8624422	1016	1019	forward	6.95054e-270	2873
420	7083361	7085048	5324435	5326129	1688	1695	forward	5.33605e-269	2864
421	4713431	4714771	6350302	6351642	1341	1341	forward	6.6923e-269	2863
422	8904984	8903695	7531144	7532430	1290	1287	reverse	1.32021e-268	2860
423	6345917	6344578	9192706	9194105	1340	1400	reverse	1.65576e-268	2859
424	9986786	9988060	6890417	6891691	1275	1275	forward	1.65576e-268	2859
425	4195525	4194496	8623394	8624423	1030	1030	reverse	4.09658e-268	2855
426	6638126	6635768	3828658	3831084	2359	2427	reverse	6.44366e-268	2853
427	2454425	2452973	10241277	10242723	1453	1447	reverse	1.01355e-267	2851
428	6390526	6389217	7579221	7580521	1310	1301	reverse	2.50765e-267	2847
429	1217449	1218735	10190634	10191920	1287	1287	forward	7.78117e-267	2842
430	9994167	9997519	6895657	6899009	3353	3353	forward	1.22393e-266	2840
431	7477338	7475712	2053910	2055539	1627	1630	reverse	1.53501e-266	2839
432	9598131	9601771	11157531	11161171	3641	3641	forward	5.97374e-266	2833
433	8004247	8006777	11544441	11546998	2531	2558	forward	7.49207e-266	2832
434	7989816	7988801	8623404	8624422	1016	1019	reverse	1.17846e-265	2830
435	1053687	1052638	7005759	7006808	1050	1050	reverse	1.85364e-265	2828
436	6838743	6840133	5692119	5693506	1391	1388	forward	2.32477e-265	2827
437	5072968	5074987	10612978	10614986	2020	2009	forward	2.32477e-265	2827
438	9455296	9457824	7440965	7443469	2529	2505	forward	3.65672e-265	2825
439	6038379	6036848	3058930	3060461	1532	1532	reverse	4.58614e-265	2824
440	10771536	10772907	9091470	9092834	1372	1365	forward	9.04721e-265	2821
441	1098013	1097150	10655431	10656294	864	864	reverse	1.09251e-263	2810
442	1097150	1098003	7288138	7288991	854	854	forward	2.15523e-263	2807
443	2457463	2455676	10238561	10240344	1788	1784	reverse	2.70302e-263	2806
444	9942670	9940508	3431368	3433527	2163	2160	reverse	6.68764e-263	2802
445	4046269	4048110	11289929	11291775	1842	1847	forward	1.05192e-262	2800
446	7205034	7202788	10138850	10141104	2247	2255	reverse	1.65461e-262	2798
447	3346432	3347652	2077637	2078887	1221	1251	forward	1.65461e-262	2798
448	4424824	4426326	4812959	4814472	1503	1514	forward	2.6026e-262	2796
449	8530370	8528658	764934	766643	1713	1710	reverse	5.13421e-262	2793
450	3792943	3794065	4343331	4344455	1123	1125	forward	5.13421e-262	2793
451	3785718	3783966	4347020	4348765	1753	1746	reverse	8.0758e-262	2791
452	2945746	2944228	1660400	1661915	1519	1516	reverse	2.5059e-261	2786
453	9946579	9944976	3427394	3429008	1604	1615	reverse	2.5059e-261	2786
454	7093592	7095434	5335781	5337627	1843	1847	forward	2.5059e-261	2786
455	5471672	5472839	5439935	5441126	1168	1192	forward	2.5059e-261	2786
456	4161884	4160717	7816986	7818153	1168	1168	reverse	4.94346e-261	2783
457	4974862	4976886	2044632	2046623	2025	1992	forward	1.92382e-260	2777
458	7456915	7456008	6101281	6102190	908	910	reverse	2.4128e-260	2776
459	8013694	8012134	4800473	4802027	1561	1555	reverse	3.02605e-260	2775
460	3405695	3404594	10554410	10555508	1102	1099	reverse	3.02605e-260	2775
461	11093655	11092142	3993580	3995084	1514	1505	reverse	9.38977e-260	2770
462	10188595	10186482	10988657	10990746	2114	2090	reverse	1.47695e-259	2768
463	3513583	3514699	3498143	3499275	1117	1133	forward	1.47695e-259	2768
464	8695135	8693657	982145	983613	1479	1469	reverse	1.85235e-259	2767
465	55831	53099	11544162	11546931	2733	2770	reverse	2.91362e-259	2765
466	8406517	8407935	10678993	10680402	1419	1410	forward	4.58295e-259	2763
467	526229	524555	11245141	11246815	1675	1675	reverse	9.0409e-259	2760
468	8456216	8454972	5722746	5723993	1245	1248	reverse	3.51841e-258	2754
469	2667395	2669232	9063699	9065533	1838	1835	forward	5.32861e-257	2742
470	705856	706945	9154789	9155878	1090	1090	forward	1.05119e-256	2739
471	1301394	1299855	8860593	8862128	1540	1536	reverse	1.31837e-256	2738
472	7107721	7109343	2345578	2347194	1623	1617	forward	4.09087e-256	2733
473	8829406	8831204	4074073	4075878	1799	1806	forward	5.13063e-256	2732
474	9444365	9445733	7427895	7429229	1369	1335	forward	8.07017e-256	2730
475	7275687	7274546	129345	130483	1142	1139	reverse	1.99666e-255	2726
476	6951355	6953159	90919	92717	1805	1799	forward	1.99666e-255	2726
477	1339449	1337260	6362482	6364673	2190	2192	reverse	9.7453e-255	2719
478	5759748	5761175	4800472	4801899	1428	1428	forward	1.22222e-254	2718
479	2507611	2508769	10386863	10388021	1159	1159	forward	1.22222e-254	2718
480	2130958	2129580	9327953	9329328	1379	1376	reverse	1.92248e-254	2716
481	4024776	4026480	8007045	8008753	1705	1709	forward	3.79253e-254	2713
482	3181122	3179841	3687399	3688692	1282	1294	reverse	9.38322e-254	2709
483	7456905	7456020	11370157	11371045	886	889	reverse	1.47592e-253	2707
484	11124179	11123030	3960126	3961281	1150	1156	reverse	4.57975e-253	2702
485	3433221	3432055	10806131	10807297	1167	1167	reverse	4.57975e-253	2702
486	7375367	7372985	9614322	9616701	2383	2380	reverse	9.0346e-253	2699
487	3667562	3666679	4430919	4431802	884	884	reverse	1.78228e-252	2696
488	7857962	7856593	2744000	2745367	1370	1368	reverse	2.23528e-252	2695
489	2141213	2139202	9318380	9320391	2012	2012	reverse	2.23528e-252	2695
490	3392085	3390444	10567761	10569396	1642	1636	reverse	3.51595e-252	2693
491	7041997	7042965	5277045	5278013	969	969	forward	4.40959e-252	2692
492	5429598	5428396	1530290	1531491	1203	1202	reverse	5.53037e-252	2691
493	6530693	6529428	5554631	5555896	1266	1266	reverse	6.93601e-252	2690
494	4658201	4660319	2227453	2229558	2119	2106	forward	1.09099e-251	2688
495	4517788	4520545	7479478	7482169	2758	2692	forward	1.09099e-251	2688
496	413989	415436	7855761	7857211	1448	1451	forward	1.09099e-251	2688
497	7950877	7949457	3873115	3874538	1421	1424	reverse	1.71606e-251	2686
498	9258848	9257084	6064824	6066591	1765	1768	reverse	3.38532e-251	2683
499	8012147	8013686	11312604	11314147	1540	1544	forward	5.3249e-251	2681
500	7786410	7787795	8989105	8990490	1386	1386	forward	8.37573e-251	2679
501	8029376	8028128	517458	518706	1249	1249	reverse	1.31745e-250	2677
502	2413279	2411893	10284116	10285565	1387	1450	reverse	1.6523e-250	2676
503	8225347	8223909	8567948	8569392	1439	1445	reverse	3.25954e-250	2673
504	10965738	10964604	8253905	8255039	1135	1135	reverse	1.5318e-248	2656
505	1003229	1005549	8333377	8335706	2321	2330	forward	3.02183e-248	2653
506	6624858	6623473	3839039	3840424	1386	1386	reverse	5.96125e-248	2650
507	2443795	2442645	10251753	10252903	1151	1151	reverse	1.17599e-247	2647
508	9489053	9487371	7468978	7470654	1683	1677	reverse	1.47489e-247	2646
509	9186468	9185306	3773860	3775066	1163	1207	reverse	2.90956e-247	2643
510	2460201	2458427	10235988	10237765	1775	1778	reverse	7.19864e-247	2639
511	5208827	5207480	3255548	3256895	1348	1348	reverse	9.0283e-247	2638
512	736772	738291	7632611	7634130	1520	1520	forward	3.5135e-246	2632
513	5377561	5378941	8285267	8286646	1381	1380	forward	5.52652e-246	2630
514	1410870	1409361	415030	416565	1510	1536	reverse	6.93118e-246	2629
515	1697069	1695403	7027974	7029641	1667	1668	reverse	1.71486e-245	2625
516	938595	940141	5163698	5165302	1547	1605	forward	2.69737e-245	2623
517	2239097	2240801	2430352	2432050	1705	1699	forward	3.38296e-245	2622
518	2761272	2764117	2846973	2849815	2846	2843	forward	8.36989e-245	2618
519	4178407	4179169	4180445	4181207	763	763	forward	2.07082e-244	2614
520	6655281	6653889	392996	394388	1393	1393	reverse	2.59716e-244	2613
521	4179187	4178406	750372	751155	782	784	reverse	2.59716e-244	2613
522	10384638	10382647	1463008	1464932	1992	1925	reverse	4.08516e-244	2611
523	7352307	7350595	9838159	9839867	1713	1709	reverse	6.42571e-244	2609
524	9268666	9269939	7103734	7105005	1274	1272	forward	2.50066e-243	2603
525	9291086	9292812	3105681	3107401	1727	1721	forward	4.93312e-243	2600
526	10674129	10675487	912090	913441	1359	1352	forward	7.7595e-243	2598
527	8560772	8559969	5546484	5547289	804	806	reverse	5.9571e-242	2589
528	4964288	4966270	2032593	2034625	1983	2033	forward	7.4712e-242	2588
529	7916333	7917091	6984764	6985522	759	759	forward	7.4712e-242	2588
530	5921751	5923736	593502	595488	1986	1987	forward	1.17517e-241	2586
531	3488175	3486809	2250359	2251728	1367	1370	reverse	2.90753e-241	2582
532	7202798	7204260	5503486	5504940	1463	1455	forward	2.90753e-241	2582
533	1726062	1724450	11005407	11007019	1613	1613	reverse	4.57337e-241	2580
534	9858249	9857241	3548214	3549222	1009	1009	reverse	5.73577e-241	2579
535	468480	467695	4180444	4181228	786	785	reverse	7.19362e-241	2578
536	9726886	9727884	7306951	7307946	999	996	forward	9.022e-241	2577
537	7581455	7583253	10546651	10548464	1799	1814	forward	1.7798e-240	2574
538	2230102	2231643	2420036	2421568	1542	1533	forward	2.79951e-240	2572
539	2130952	2128551	5503531	5505929	2402	2399	reverse	4.40345e-240	2570
540	5830604	5829250	6468231	6469588	1355	1358	reverse	6.92635e-240	2568
541	2070694	2072723	11348888	11350875	2030	1988	forward	1.36638e-239	2565
542	467686	468479	750365	751154	794	790	forward	1.71367e-239	2564
543	3904041	3906202	6609526	6611684	2162	2159	forward	1.71367e-239	2564
544	3256011	3254390	10348740	10350370	1622	1631	reverse	2.69549e-239	2562
545	362267	363289	5561858	5562875	1023	1018	forward	2.69549e-239	2562
546	6431957	6430304	7557779	7559443	1654	1665	reverse	1.04899e-238	2556
547	8560776	8559982	6214102	6214896	795	795	reverse	1.31561e-238	2555
548	9195833	9197143	3915114	3916421	1311	1308	forward	1.65e-238	2554
549	7298392	7297100	441919	443211	1293	1293	reverse	2.06938e-238	2553
550	4572365	4573764	7922182	7923570	1400	1389	forward	1.26673e-237	2545
551	1600231	1601903	6668321	6669985	1673	1665	forward	2.49892e-237	2542
552	7795419	7797426	1776561	1778568	2008	2008	forward	3.93064e-237	2540
553	8033193	8032296	512765	513662	898	898	reverse	7.75408e-237	2537
554	4179169	4178407	1458245	1459006	763	762	reverse	7.75408e-237	2537
555	10319699	10320996	617901	619198	1298	1298	forward	2.40607e-236	2532
556	4135619	4136940	11305411	11306733	1322	1323	forward	7.46599e-236	2527
557	2768629	2769468	2854946	2855791	840	846	forward	2.9055e-235	2521
558	7689924	7691188	1004316	1005580	1265	1265	forward	3.64399e-235	2520
559	7776830	7778558	8979639	8981388	1729	1750	forward	3.64399e-235	2520
560	7477441	7475707	3105681	3107409	1735	1729	reverse	5.73177e-235	2518
561	5965575	5967986	9898050	9900457	2412	2408	forward	9.01571e-235	2516
562	3872232	3870914	6632310	6633632	1319	1323	reverse	1.77855e-234	2513
563	4587407	4588145	5612896	5613634	739	739	forward	4.40038e-234	2509
564	4494898	4493576	7766150	7767481	1323	1332	reverse	6.92152e-234	2507
565	7038272	7039469	5271694	5272891	1198	1198	forward	8.68074e-234	2506
566	1746818	1745385	10139669	10141105	1434	1437	reverse	1.36543e-233	2504
567	8725074	8723451	6767206	6768807	1624	1602	reverse	2.14773e-233	2502
568	8160846	8161724	8516411	8517283	879	873	forward	3.37824e-233	2500
569	8559982	8560781	5780571	5781370	800	800	forward	1.04826e-232	2495
570	4770562	4771851	6284332	6285624	1290	1293	forward	1.04826e-232	2495
571	8954523	8953788	465130	465865	736	736	reverse	2.06793e-232	2492
572	6915859	6915062	5546482	5547279	798	798	reverse	5.11634e-232	2488
573	8924342	8922961	7510433	7511808	1382	1376	reverse	8.04768e-232	2486
574	311373	313564	5663009	5665200	2192	2192	forward	1.26585e-231	2484
575	8169361	8170230	8516411	8517281	870	871	forward	1.58759e-231	2483
576	2789035	2790240	2875934	2877142	1206	1209	forward	1.9911e-231	2482
577	4046540	4048849	4156271	4158580	2310	2310	forward	3.13188e-231	2480
578	6915857	6915065	6214106	6214898	793	793	reverse	6.17834e-231	2477
579	467718	468480	1458246	1459007	763	762	forward	1.5286e-230	2473
580	5549184	5550541	1835868	1837250	1358	1383	forward	1.5286e-230	2473
581	774291	772528	1378612	1380364	1764	1753	reverse	3.78196e-230	2469
582	512026	513131	11195146	11196252	1106	1107	forward	5.94879e-230	2467
583	1237112	1236240	8919096	8919980	873	885	reverse	9.35708e-230	2465
584	3398848	3396750	2696575	2698666	2099	2092	reverse	1.8459e-229	2462
585	3228243	3226234	8596354	8598305	2010	1952	reverse	7.18359e-229	2456
586	3270627	3268577	10366192	10368239	2051	2048	reverse	1.77731e-228	2452
587	5646895	5645762	2633281	2634409	1134	1129	reverse	2.22905e-228	2451
588	6350303	6348698	9188054	9189671	1606	1618	reverse	2.7956e-228	2450
589	9899721	9898723	7369986	7371040	999	1055	reverse	5.51496e-228	2447
590	8238256	8238979	8122477	8123197	724	721	forward	5.31006e-227	2437
591	11060745	11059803	4023231	4024170	943	940	reverse	6.65971e-227	2436
592	9294623	9293704	324626	325545	920	920	reverse	1.31378e-226	2433
593	5270524	5268690	8771743	8773576	1835	1834	reverse	1.31378e-226	2433
594	9343806	9342652	8610754	8611891	1155	1138	reverse	2.59173e-226	2430
595	9244645	9243307	6082394	6083726	1339	1333	reverse	4.07662e-226	2428
596	6705537	6706641	3440116	3441232	1105	1117	forward	5.11277e-226	2427
597	6915065	6915858	5780569	5781362	794	794	forward	5.11277e-226	2427
598	2126203	2128010	10136268	10138120	1808	1853	forward	5.11277e-226	2427
599	3223161	3222088	11039059	11040132	1074	1074	reverse	6.41227e-226	2426
600	5128445	5129678	3148689	3149922	1234	1234	forward	1.00861e-225	2424
601	5157940	5159190	3182296	3183546	1251	1251	forward	9.71137e-225	2414
602	3442334	3440530	10799292	10801030	1805	1739	reverse	1.91579e-224	2411
603	4587414	4588137	6984765	6985488	724	724	forward	1.91579e-224	2411
604	166542	164947	4854209	4855795	1596	1587	reverse	3.77933e-224	2408
605	4649024	4648040	6373758	6374742	985	985	reverse	1.47078e-223	2402
606	7488689	7487034	5616497	5618152	1656	1656	reverse	7.17858e-223	2395
607	1024677	1023461	6796140	6797348	1217	1209	reverse	7.17858e-223	2395
608	5062965	5059687	10632617	10635886	3279	3270	reverse	1.12915e-222	2393
609	8081199	8082703	11320714	11322215	1505	1502	forward	2.2275e-222	2390
610	1501302	1500377	191869	192802	926	934	reverse	2.79365e-222	2389
611	4542723	4540325	239765	242191	2399	2427	reverse	6.91187e-222	2385
612	10705419	10704020	7801767	7803166	1400	1400	reverse	1.36352e-221	2382
613	2270391	2272020	2680183	2681819	1630	1637	forward	1.36352e-221	2382
614	7916335	7917103	5612904	5613671	769	768	forward	1.71009e-221	2381
615	10065632	10064904	6101286	6102017	729	732	reverse	2.68986e-221	2379
616	8740231	8741133	813900	814799	903	900	forward	5.30636e-221	2376
617	11081625	11080185	4009178	4010621	1441	1444	reverse	6.65507e-221	2375
618	3996801	3998542	7983698	7985436	1742	1739	forward	1.0468e-220	2373
619	8995699	8996592	1564387	1565280	894	894	forward	1.64655e-220	2371
620	640796	642133	2562967	2564316	1338	1350	forward	2.58992e-220	2369
621	131499	134099	4364298	4366905	2601	2608	forward	5.10921e-220	2366
622	6940106	6941818	80473	82184	1713	1712	forward	1.58537e-219	2361
623	7095378	7093997	5503531	5504912	1382	1382	reverse	2.4937e-219	2359
624	8614684	8616181	1312188	1313679	1498	1492	forward	2.4937e-219	2359
625	4919396	4921120	11001805	11003524	1725	1720	forward	3.92243e-219	2357
626	8100654	8102169	11263598	11265069	1516	1472	forward	3.92243e-219	2357
627	7833650	7832188	2767102	2768553	1463	1452	reverse	6.16973e-219	2355
628	2127976	2126206	5506498	5508278	1771	1781	reverse	1.21712e-218	2352
629	2425775	2424061	10270342	10272056	1715	1715	reverse	1.21712e-218	2352
630	5749341	5750817	11425120	11426610	1477	1491	forward	1.21712e-218	2352
631	8013689	8012154	11425178	11426722	1536	1545	reverse	1.52647e-218	2351
632	6606898	6605839	9526491	9527550	1060	1060	reverse	2.40104e-218	2349
633	7261073	7259504	11290200	11291778	1570	1579	reverse	2.40104e-218	2349
634	8488010	8489068	6052806	6053864	1059	1059	forward	2.40104e-218	2349
635	941313	942978	5166784	5168515	1666	1732	forward	3.01131e-218	2348
636	900371	901140	2854943	2855715	770	773	forward	3.77669e-218	2347
637	8613804	8612552	662335	663596	1253	1262	reverse	4.73661e-218	2346
638	2329143	2328102	6456817	6457869	1042	1053	reverse	4.73661e-218	2346
639	10065637	10064904	11370147	11370884	734	738	reverse	5.9405e-218	2345
640	8646839	8645287	1362132	1363684	1553	1553	reverse	9.34403e-218	2343
641	620507	618818	8788858	8790549	1690	1692	reverse	1.1719e-217	2342
642	5795541	5796462	10872038	10872945	922	908	forward	1.1719e-217	2342
643	5799125	5800314	1760111	1761321	1190	1211	forward	1.46976e-217	2341
644	8399590	8398422	2721292	2722463	1169	1172	reverse	1.84332e-217	2340
645	1394104	1392711	715478	716868	1394	1391	reverse	2.89943e-217	2338
646	6895500	6894075	3663461	3664886	1426	1426	reverse	3.63637e-217	2337
647	7787781	7786563	10969875	10971093	1219	1219	reverse	4.56062e-217	2336
648	5850612	5849661	7877994	7878945	952	952	reverse	5.71979e-217	2335
649	10010118	10011453	6917679	6919020	1336	1342	forward	8.99687e-217	2333
650	7948863	7947625	3875120	3876364	1239	1245	reverse	2.79171e-216	2328
651	8349006	8347535	8199593	8201058	1472	1466	reverse	4.39118e-216	2326
652	5211281	5209661	3253277	3254878	1621	1602	reverse	5.50728e-216	2325
653	2714009	2714969	4958927	4959888	961	962	forward	1.08644e-215	2322
654	4767657	4768487	6281601	6282431	831	831	forward	2.14324e-215	2319
655	9991379	9992777	6893042	6894440	1399	1399	forward	2.68798e-215	2318
656	7422433	7420963	6124656	6126128	1471	1473	reverse	4.22803e-215	2316
657	1414411	1418021	7200585	7204216	3611	3632	forward	5.30266e-215	2315
658	6382272	6380904	7588019	7589382	1369	1364	reverse	8.34075e-215	2313
659	4426289	4424870	11425178	11426605	1420	1428	reverse	8.34075e-215	2313
660	1501189	1500377	935442	936260	813	819	reverse	1.04607e-214	2312
661	8888935	8890334	7534448	7535847	1400	1400	forward	1.31195e-214	2311
662	5987532	5989269	3039967	3041707	1738	1741	forward	2.58811e-214	2308
663	788354	786941	2357392	2358808	1414	1417	reverse	1.0072e-213	2302
664	9808047	9807023	8382875	8383899	1025	1025	reverse	1.58427e-213	2300
665	2321903	2320450	4708190	4709640	1454	1451	reverse	1.98694e-213	2299
666	8535255	8536786	3398284	3399845	1532	1562	forward	3.91969e-213	2296
667	7452500	7451089	4813002	4814407	1412	1406	reverse	1.21627e-212	2291
668	954204	956316	5180208	5182329	2113	2122	forward	1.21627e-212	2291
669	7128058	7125617	5364070	5366520	2442	2451	reverse	1.52541e-212	2290
670	10086662	10085488	3565357	3566543	1175	1187	reverse	3.00921e-212	2287
671	10057611	10055438	11378179	11380352	2174	2174	reverse	3.77406e-212	2286
672	3323100	3321918	2116559	2117741	1183	1183	reverse	4.7333e-212	2285
673	374777	376114	5576524	5577765	1338	1242	forward	7.44519e-212	2283
674	10700390	10698809	7807960	7809541	1582	1582	reverse	1.46873e-211	2280
675	4825639	4824543	6278572	6279667	1097	1096	reverse	4.55744e-211	2275
676	2511410	2513387	10392237	10394256	1978	2020	forward	4.55744e-211	2275
677	9969934	9969038	6841793	6842690	897	898	reverse	5.7158e-211	2274
678	2435888	2434726	10260852	10262017	1163	1166	reverse	8.99059e-211	2272
679	10568815	10570442	213367	214988	1628	1622	forward	1.12757e-210	2271
680	3379692	3381414	9294623	9296336	1723	1714	forward	1.41416e-210	2270
681	1265166	1263923	8888368	8889614	1244	1247	reverse	2.78976e-210	2267
682	8756509	8757646	4112498	4113635	1138	1138	forward	2.78976e-210	2267
683	2464410	2465788	3645915	3647293	1379	1379	forward	3.49883e-210	2266
684	9169643	9168181	3902061	3903531	1463	1471	reverse	4.38812e-210	2265
685	2011621	2012980	9952633	9953992	1360	1360	forward	4.38812e-210	2265
686	1746820	1745407	5336193	5337603	1414	1411	reverse	8.65656e-210	2262
687	7202845	7204454	9327962	9329564	1610	1603	forward	1.08568e-209	2261
688	4990992	4989801	9277006	9278191	1192	1186	reverse	1.7077e-209	2259
689	3772778	3773820	4716860	4717902	1043	1043	forward	1.7077e-209	2259
690	3395450	3394358	10564570	10565662	1093	1093	reverse	8.33493e-209	2252
691	8450235	8448693	5729007	5730546	1543	1540	reverse	1.04534e-208	2251
692	1118817	1120810	4900118	4902105	1994	1988	forward	5.10208e-208	2244
693	1748393	1750180	9330936	9332722	1788	1787	forward	8.02526e-208	2242
694	3162119	3161319	3709318	3710113	801	796	reverse	1.58316e-207	2239
695	4144168	4142765	11425199	11426608	1404	1410	reverse	1.58316e-207	2239
696	4409629	4407891	40560	42287	1739	1728	reverse	4.91252e-207	2234
697	4163666	4162352	7814921	7816243	1315	1323	reverse	4.91252e-207	2234
698	1709463	1708510	11022992	11023945	954	954	reverse	4.91252e-207	2234
699	2667780	2669250	2054073	2055555	1471	1483	forward	4.91252e-207	2234
700	5512574	5514575	307766	309772	2002	2007	forward	1.52434e-206	2229
701	2768632	2769394	6972368	6973130	763	763	forward	1.52434e-206	2229
702	3754887	3753749	6957211	6958355	1139	1145	reverse	4.73e-206	2224
703	10664847	10665948	903180	904281	1102	1102	forward	4.73e-206	2224
704	5662683	5661221	2620507	2621894	1463	1388	reverse	5.93222e-206	2223
705	1641836	1640885	1073457	1074414	952	958	reverse	9.33101e-206	2221
706	2893949	2892851	2944095	2945196	1099	1102	reverse	1.17027e-205	2220
707	900376	901201	6972367	6973197	826	831	forward	1.17027e-205	2220
708	8758949	8760387	4114637	4116086	1439	1450	forward	1.46771e-205	2219
709	1446468	1447513	7239603	7240648	1046	1046	forward	1.46771e-205	2219
710	286413	284218	6551648	6553834	2196	2187	reverse	2.30861e-205	2217
711	2593409	2595195	10468103	10469886	1787	1784	forward	4.55427e-205	2214
712	9904190	9902696	7365160	7366651	1495	1492	reverse	7.16357e-205	2212
713	8843355	8844600	4090580	4091831	1246	1252	forward	7.16357e-205	2212
714	9263404	9264587	7098033	7099216	1184	1184	forward	2.78781e-204	2206
715	762406	763500	7663598	7664690	1095	1093	forward	5.4996e-204	2203
716	632018	631065	2567076	2568032	954	957	reverse	1.08492e-203	2200
717	7023634	7022146	5220207	5221678	1489	1472	reverse	1.36067e-203	2199
718	4559408	4560273	7907412	7908277	866	866	forward	1.70651e-203	2198
719	1745442	1746812	9327961	9329322	1371	1362	forward	1.70651e-203	2198
720	4096830	4095687	7962847	7963990	1144	1144	reverse	2.14025e-203	2197
721	5684419	5685521	3649028	3650130	1103	1103	forward	2.68424e-203	2196
722	3314098	3314814	2111468	2112185	717	718	forward	4.22214e-203	2194
723	2726036	2728243	4976441	4978748	2208	2308	forward	4.22214e-203	2194
724	1081865	1083644	165400	167283	1780	1884	forward	5.29527e-203	2193
725	2589134	2590088	10463552	10464503	955	952	forward	5.29527e-203	2193
726	3629703	3631422	10077633	10079345	1720	1713	forward	8.32912e-203	2191
727	10229965	10228953	4406209	4407227	1013	1019	reverse	2.06073e-202	2187
728	4085368	4083868	3623482	3625051	1501	1570	reverse	4.06527e-202	2184
729	2441876	2440605	10253835	10255108	1272	1274	reverse	1.26144e-201	2179
730	9349128	9347897	197495	198726	1232	1232	reverse	2.48848e-201	2176
731	11157686	11156055	3011367	3012983	1632	1617	reverse	3.91423e-201	2174
732	1456950	1458335	7251536	7252927	1386	1392	forward	3.91423e-201	2174
733	757334	758754	7658932	7660351	1421	1420	forward	3.91423e-201	2174
734	7706714	7708177	1025352	1026813	1464	1462	forward	4.9091e-201	2173
735	2158361	2157089	675813	677089	1273	1277	reverse	6.15683e-201	2172
736	3987985	3989605	274623	276243	1621	1621	forward	9.68431e-201	2170
737	3313870	3314552	2111468	2112150	683	683	forward	1.52328e-200	2168
738	2129579	2131003	10139668	10141101	1425	1434	forward	1.52328e-200	2168
739	7205771	7207274	9330917	9332420	1504	1504	forward	1.91045e-200	2167
740	4171288	4172321	751491	752524	1034	1034	forward	2.39603e-200	2166
741	3823806	3822719	8344352	8345439	1088	1088	reverse	3.00502e-200	2165
742	3313638	3314324	2111464	2112150	687	687	forward	3.7688e-200	2164
743	10556180	10557172	8943505	8944497	993	993	forward	5.92808e-200	2162
744	2856850	2855580	2891513	2892777	1271	1265	reverse	7.43481e-200	2161
745	2743258	2742131	8581541	8582862	1128	1322	reverse	7.43481e-200	2161
746	10843859	10842345	9227065	9228625	1515	1561	reverse	9.3245e-200	2160
747	5924444	5925992	596459	598001	1549	1543	forward	4.55109e-199	2153
748	5545845	5546823	1832787	1833753	979	967	forward	7.15858e-199	2151
749	7954056	7952261	3868788	3870580	1796	1793	reverse	1.77113e-198	2147
750	1575910	1577128	1608812	1610032	1219	1221	forward	3.49395e-198	2144
751	581808	582480	3954935	3955607	673	673	forward	3.49395e-198	2144
752	2971968	2973662	9052606	9054308	1695	1703	forward	6.89261e-198	2141
753	6648911	6648085	399609	400439	827	831	reverse	1.08416e-197	2139
754	4907053	4906017	685399	686432	1037	1034	reverse	2.68236e-197	2135
755	1048015	1046381	6778940	6780589	1635	1650	reverse	2.68236e-197	2135
756	8439692	8441263	1433382	1434923	1572	1542	forward	3.36414e-197	2134
757	3145839	3146727	6494603	6495492	889	890	forward	8.32331e-197	2130
758	7350008	7348825	9840448	9841632	1184	1185	reverse	2.0593e-196	2126
759	1501189	1500354	429071	429908	836	838	reverse	3.23915e-196	2124
760	440965	439559	3374702	3376116	1407	1415	reverse	1.0051e-195	2119
761	739230	740463	7634601	7635828	1234	1228	forward	1.26056e-195	2118
762	819792	820588	191981	192783	797	803	forward	1.98279e-195	2116
763	2049403	2050407	5528891	5529895	1005	1005	forward	2.48675e-195	2115
764	7451049	7452502	4804043	4805493	1454	1451	forward	6.15254e-195	2111
765	5808947	5807611	1752127	1753459	1337	1333	reverse	2.39436e-194	2105
766	7175761	7176508	5420879	5421626	748	748	forward	3.00292e-194	2104
767	9939595	9937631	3434145	3436114	1965	1970	reverse	1.16863e-193	2098
768	1247807	1246058	8907619	8909371	1750	1753	reverse	1.16863e-193	2098
769	819609	820613	935260	936271	1005	1012	forward	1.16863e-193	2098
770	5091529	5090027	10602874	10604382	1503	1509	reverse	1.46566e-193	2097
771	919557	920226	5141206	5141876	670	671	forward	3.62624e-193	2093
772	4140013	4142021	11309998	11311969	2009	1972	forward	3.62624e-193	2093
773	6066739	6067722	2520314	2521312	984	999	forward	5.70385e-193	2091
774	8448680	8450219	1784655	1786191	1540	1537	forward	7.15359e-193	2090
775	10615192	10613882	8672277	8673590	1311	1314	reverse	2.78393e-192	2084
776	8470842	8469103	9592057	9593799	1740	1743	reverse	2.78393e-192	2084
777	6943267	6944324	84161	85218	1058	1058	forward	4.37894e-192	2082
778	731162	732363	7626663	7627867	1202	1205	forward	4.37894e-192	2082
779	9967375	9968365	2541829	2542821	991	993	forward	6.8878e-192	2080
780	4983993	4985456	3105953	3107401	1464	1449	forward	8.63846e-192	2079
781	922767	923935	5145825	5146993	1169	1169	forward	1.08341e-191	2078
782	357523	356397	7837484	7838577	1127	1094	reverse	3.36179e-191	2073
783	5577221	5578322	2440021	2441122	1102	1102	forward	3.36179e-191	2073
784	7029815	7031175	8691275	8692634	1361	1360	forward	3.36179e-191	2073
785	3540849	3538565	3481178	3483474	2285	2297	reverse	4.21625e-191	2072
786	2904298	2905656	2953315	2954664	1359	1350	forward	4.21625e-191	2072
787	3465868	3464774	3493649	3494749	1095	1101	reverse	5.28789e-191	2071
788	2902775	2903842	2955731	2956795	1068	1065	forward	2.05786e-190	2065
789	8839338	8840426	4084980	4086076	1089	1097	forward	3.23689e-190	2063
790	9226816	9225589	3918755	3919979	1228	1225	reverse	5.09142e-190	2061
791	5241535	5242864	7388199	7389531	1330	1333	forward	5.09142e-190	2061
792	7656486	7657720	2155611	2156846	1235	1236	forward	6.3855e-190	2060
793	5280107	5278357	8761893	8763635	1751	1743	reverse	8.00848e-190	2059
794	2074349	2075416	11352400	11353467	1068	1068	forward	8.00848e-190	2059
795	10683637	10682174	3105953	3107401	1464	1449	reverse	1.0044e-189	2058
796	8453411	8452181	5725719	5726951	1231	1233	reverse	1.25968e-189	2057
797	426609	425573	3388772	3389728	1037	957	reverse	2.48501e-189	2054
798	3952233	3953664	6217603	6219034	1432	1432	forward	2.48501e-189	2054
799	6745211	6743901	10439710	10441020	1311	1311	reverse	3.11662e-189	2053
800	2018713	2017536	9959763	9960940	1178	1178	reverse	6.14825e-189	2050
801	6874319	6875027	3655014	3655721	709	708	forward	6.14825e-189	2050
802	7750789	7751763	8644660	8645634	975	975	forward	1.21288e-188	2047
803	3804568	3803422	8361487	8362636	1147	1150	reverse	1.52116e-188	2046
804	7775074	7775711	8978399	8979037	638	639	forward	3.00083e-188	2043
805	8951400	8950759	469883	470523	642	641	reverse	3.76354e-188	2042
806	9208486	9209856	9822253	9823623	1371	1371	forward	4.72012e-188	2041
807	2367320	2366061	6423300	6424568	1260	1269	reverse	9.3115e-188	2038
808	1088093	1089268	11204301	11205466	1176	1166	forward	1.46464e-187	2036
809	9971568	9970674	6840352	6841246	895	895	reverse	1.83691e-187	2035
810	9271269	9272471	7106314	7107519	1203	1206	forward	4.54475e-187	2031
811	7775692	7775083	469915	470524	610	610	reverse	1.12443e-186	2027
812	2171754	2172767	9357331	9358344	1014	1014	forward	1.12443e-186	2027
813	7103306	7104415	5345481	5346588	1110	1108	forward	1.41022e-186	2026
814	7142690	7143957	5383656	5384920	1268	1265	forward	1.76866e-186	2025
815	7094007	7095322	10139673	10140994	1316	1322	forward	2.78199e-186	2023
816	11154926	11153699	3015564	3016803	1228	1240	reverse	4.37589e-186	2021
817	2235041	2236478	2424639	2426068	1438	1430	forward	4.37589e-186	2021
818	126752	128054	4841797	4843108	1303	1312	forward	5.4881e-186	2020
819	586337	587799	8272403	8273865	1463	1463	forward	5.4881e-186	2020
820	2104601	2105804	666968	668159	1204	1192	forward	6.883e-186	2019
821	2385008	2383867	10315073	10316211	1142	1139	reverse	1.08265e-185	2017
822	163281	162015	4857786	4859052	1267	1267	reverse	1.35783e-185	2016
823	5909646	5910920	582346	583597	1275	1252	forward	1.35783e-185	2016
824	2452193	2450772	10243266	10244697	1422	1432	reverse	1.70295e-185	2015
825	7294421	7293562	109135	109994	860	860	reverse	2.13578e-185	2014
826	536206	535255	2020757	2021711	952	955	reverse	2.13578e-185	2014
827	7757729	7758850	8655136	8656254	1122	1119	forward	2.13578e-185	2014
828	185344	184590	935319	936078	755	760	reverse	3.35945e-185	2012
829	10078309	10077242	3572963	3574030	1068	1068	reverse	3.35945e-185	2012
830	8989678	8991042	8748384	8749739	1365	1356	forward	4.21331e-185	2011
831	9498831	9497838	1445128	1446121	994	994	reverse	5.2842e-185	2010
832	5437878	5440544	1491838	1494511	2667	2674	forward	8.31171e-185	2008
833	1281329	1282557	8840639	8841876	1229	1238	forward	8.31171e-185	2008
834	9860610	9859675	3547271	3548216	936	946	reverse	1.04243e-184	2007
835	3736479	3737632	5089849	5091007	1154	1159	forward	1.63967e-184	2005
836	3034798	3034019	2320310	2321089	780	780	reverse	2.05643e-184	2004
837	819749	820610	429028	429894	862	867	forward	2.5791e-184	2003
838	2910153	2909279	1696987	1697861	875	875	reverse	3.23463e-184	2002
839	7201784	7200444	10141962	10143305	1341	1344	reverse	3.23463e-184	2002
840	5241175	5242872	10208711	10210416	1698	1706	forward	4.05677e-184	2001
841	634945	636098	2557910	2559057	1154	1148	forward	1.0037e-183	1997
842	5902530	5903713	572764	573912	1184	1149	forward	1.25881e-183	1996
843	7223778	7224432	3744437	3745091	655	655	forward	1.57875e-183	1995
844	3152081	3151464	3722011	3722631	618	621	reverse	3.90604e-183	1991
845	1111273	1112724	4892101	4893595	1452	1495	forward	3.90604e-183	1991
846	10412311	10410585	1556174	1557909	1727	1736	reverse	4.89884e-183	1990
847	2641192	2639658	3602478	3604014	1535	1537	reverse	7.70556e-183	1988
848	3945129	3943554	10902316	10903891	1576	1576	reverse	1.21204e-182	1986
849	11000365	11000971	2797900	2798506	607	607	forward	1.21204e-182	1986
850	8680368	8681492	2381415	2382582	1125	1168	forward	1.5201e-182	1985
851	5733603	5735117	3312482	3313990	1515	1509	forward	2.39102e-182	1983
852	8950753	8951367	8978401	8979017	615	617	forward	2.39102e-182	1983
853	711535	712763	9159314	9160544	1229	1231	forward	2.99874e-182	1982
854	1185210	1183892	10110449	10111773	1319	1325	reverse	5.91569e-182	1979
855	10064904	10064250	11370410	11371064	655	655	reverse	7.41927e-182	1978
856	1649142	1650451	4426359	4427662	1310	1304	forward	9.30501e-182	1977
857	9588901	9590347	11149022	11150457	1447	1436	forward	1.83562e-181	1974
858	10540034	10541149	8929595	8930750	1116	1156	forward	4.54158e-181	1970
859	7008890	7007834	5236610	5237671	1057	1062	reverse	5.6959e-181	1969
860	4553154	4551567	836779	838366	1588	1588	reverse	1.76742e-180	1964
861	3079838	3078547	2289078	2290363	1292	1286	reverse	2.78005e-180	1962
862	11052463	11051793	9012860	9013528	671	669	reverse	4.37284e-180	1960
863	9393047	9392061	1413481	1414549	987	1069	reverse	1.0819e-179	1956
864	1661692	1662789	8172145	8173242	1098	1098	forward	1.35688e-179	1955
865	10797900	10799172	4768101	4769376	1273	1276	forward	2.13429e-179	1953
866	7306355	7307633	8461802	8463080	1279	1279	forward	2.13429e-179	1953
867	2795809	2796786	2884069	2885042	978	974	forward	3.3571e-179	1951
868	5588735	5589522	9609662	9610449	788	788	forward	3.3571e-179	1951
869	7130103	7128784	5361661	5362983	1320	1323	reverse	4.21037e-179	1950
870	8294536	8295643	8154782	8155889	1108	1108	forward	4.21037e-179	1950
871	11033000	11031905	1624334	1625418	1096	1085	reverse	6.62265e-179	1948
872	5018395	5019269	7698410	7699281	875	872	forward	6.62265e-179	1948
873	5949253	5951721	9881110	9883586	2469	2477	forward	6.62265e-179	1948
874	7224432	7223778	1315556	1316210	655	655	reverse	8.30592e-179	1947
875	1477848	1476716	1116309	1117438	1133	1130	reverse	1.30647e-178	1945
876	6775153	6774112	7172732	7173770	1042	1039	reverse	1.63853e-178	1944
877	4692753	4691584	6037350	6038513	1170	1164	reverse	2.05499e-178	1943
878	5398361	5397082	8305913	8307189	1280	1277	reverse	2.57731e-178	1942
879	6453009	6452097	2917449	2918360	913	912	reverse	4.05394e-178	1940
880	7307633	7306332	4457544	4458845	1302	1302	reverse	5.08432e-178	1939
881	3250043	3249034	10353609	10354609	1010	1001	reverse	5.08432e-178	1939
882	10064904	10064267	6101543	6102180	638	638	reverse	1.003e-177	1936
883	7669766	7668748	2395368	2396392	1019	1025	reverse	1.57765e-177	1934
884	2548157	2549118	10428318	10429264	962	947	forward	1.57765e-177	1934
885	9486684	9485426	7471549	7472813	1259	1265	reverse	1.97864e-177	1933
886	5833336	5832026	4457523	4458836	1311	1314	reverse	2.48155e-177	1932
887	225435	227031	866789	868384	1597	1596	forward	4.89542e-177	1929
888	11116368	11115139	3966380	3967615	1230	1236	reverse	9.65733e-177	1926
889	3184001	3183486	1396798	1397314	516	517	reverse	2.38935e-176	1922
890	7827052	7825480	2774184	2775751	1573	1568	reverse	3.7583e-176	1920
891	5890448	5891751	560374	561667	1304	1294	forward	3.7583e-176	1920
892	659374	658169	2571547	2572758	1206	1212	reverse	5.91157e-176	1918
893	3183491	3184010	6871763	6872280	520	518	forward	5.91157e-176	1918
894	7554877	7554161	2797803	2798510	717	708	reverse	7.4141e-176	1917
895	1613865	1612730	7882201	7883336	1136	1136	reverse	7.4141e-176	1917
896	3306371	3307230	2104457	2105316	860	860	forward	1.16619e-175	1915
897	7554771	7554164	9404618	9405225	608	608	reverse	2.30058e-175	1912
898	11000291	11000972	9404546	9405225	682	680	forward	2.30058e-175	1912
899	8940801	8939705	8087101	8088197	1097	1097	reverse	3.61866e-175	1910
900	6535630	6534216	4800500	4801914	1415	1415	reverse	7.13863e-175	1907
901	6727706	6729315	5066225	5067837	1610	1613	forward	8.95305e-175	1906
902	7286666	7285471	117649	118844	1196	1196	reverse	1.40826e-174	1904
903	3043724	3042511	2310934	2312150	1214	1217	reverse	2.2151e-174	1902
904	6806424	6805516	7140629	7141537	909	909	reverse	2.2151e-174	1902
905	7798868	7799724	10573016	10573869	857	854	forward	2.2151e-174	1902
906	4738324	4737010	6403775	6405074	1315	1300	reverse	2.77811e-174	1901
907	5473979	5475131	5442230	5443382	1153	1153	forward	5.48045e-174	1898
908	3568169	3569611	8074814	8076247	1443	1434	forward	8.62041e-174	1896
909	8580279	8579075	4684939	4686143	1205	1205	reverse	1.08114e-173	1895
910	2830657	2829807	1949330	1950172	851	843	reverse	1.70057e-173	1893
911	5857629	5856431	7870395	7871587	1199	1193	reverse	1.70057e-173	1893
912	1412240	1413233	7199124	7200081	994	958	forward	1.70057e-173	1893
913	10970467	10969490	8248319	8249284	978	966	reverse	2.1328e-173	1892
914	7213471	7212301	10129741	10130904	1171	1164	reverse	4.20744e-173	1889
915	8583726	8582115	4681059	4682658	1612	1600	reverse	1.30556e-172	1884
916	6957185	6958142	100185	101136	958	952	forward	1.30556e-172	1884
917	221916	223222	863700	865015	1307	1316	forward	1.30556e-172	1884
918	9415157	9417042	8629263	8631154	1886	1892	forward	1.30556e-172	1884
919	5463633	5464718	5430099	5431189	1086	1091	forward	1.63739e-172	1883
920	360869	361581	5560119	5560835	713	717	forward	1.63739e-172	1883
921	3151479	3152047	3655006	3655575	569	570	forward	3.23012e-172	1880
922	121698	123084	11391082	11392471	1387	1390	forward	3.23012e-172	1880
923	8667364	8668484	2368550	2369670	1121	1121	forward	4.05111e-172	1879
924	7338522	7336493	9852561	9854698	2030	2138	reverse	7.99174e-172	1876
925	4813167	4814125	6326149	6327103	959	955	forward	7.99174e-172	1876
926	8017909	8016558	40947	42289	1352	1343	reverse	1.25705e-171	1874
927	11140491	11139125	3029027	3030390	1367	1364	reverse	1.25705e-171	1874
928	5394441	5392842	8310182	8311781	1600	1600	reverse	1.25705e-171	1874
929	3160071	3158803	3712282	3713556	1269	1275	reverse	1.57655e-171	1873
930	4548289	4549265	924215	925191	977	977	forward	1.97726e-171	1872
931	3658153	3658976	4433784	4434607	824	824	forward	3.11011e-171	1870
932	6765244	6764017	7182514	7183738	1228	1225	reverse	3.9006e-171	1869
933	7187462	7188185	10153550	10154276	724	727	forward	4.89201e-171	1868
934	6874877	6874319	3722047	3722608	559	562	reverse	9.6506e-171	1865
935	816221	816722	1396800	1397301	502	502	forward	9.6506e-171	1865
936	2129578	2130953	5336193	5337571	1376	1379	forward	9.6506e-171	1865
937	10807314	10808151	4776925	4777764	838	840	forward	1.51798e-170	1863
938	3547933	3549032	8054334	8055447	1100	1114	forward	1.51798e-170	1863
939	4402931	4401743	11402285	11403472	1189	1188	reverse	1.9038e-170	1862
940	873684	872789	3894561	3895452	896	892	reverse	2.99456e-170	1860
941	3692111	3690468	5970818	5972458	1644	1641	reverse	2.99456e-170	1860
942	4846822	4844786	6252831	6254870	2037	2040	reverse	2.99456e-170	1860
943	4501987	4501071	7758876	7759792	917	917	reverse	2.99456e-170	1860
944	4634152	4635457	6025142	6026458	1306	1317	forward	2.99456e-170	1860
945	7769693	7771744	8667894	8669948	2052	2055	forward	2.99456e-170	1860
946	8482710	8481559	9579323	9580480	1152	1158	reverse	4.71025e-170	1858
947	8658437	8659777	1365915	1367378	1341	1464	forward	4.71025e-170	1858
948	7205965	7207272	5506665	5507981	1308	1317	forward	5.90744e-170	1857
949	816730	816221	6871762	6872271	510	510	reverse	9.29204e-170	1855
950	6534226	6535636	11312724	11314134	1411	1411	forward	9.29204e-170	1855
951	8005493	8006712	11054354	11055573	1220	1220	forward	1.16538e-169	1854
952	5886959	5886049	5457125	5458038	911	914	reverse	1.46158e-169	1853
953	10031489	10032132	6938514	6939157	644	644	forward	1.83307e-169	1852
954	11175309	11174169	2998233	2999379	1141	1147	reverse	2.29897e-169	1851
955	10695661	10696732	3370885	3371956	1072	1072	forward	2.29897e-169	1851
956	5444752	5445592	1498005	1498845	841	841	forward	2.8833e-169	1850
957	8379413	8378130	9387870	9389192	1284	1323	reverse	8.9468e-169	1845
958	8039423	8038086	505897	507234	1338	1338	reverse	1.40728e-168	1843
959	6535466	6534231	4804256	4805491	1236	1236	reverse	2.77617e-168	1840
960	4154953	4153695	7830015	7831260	1259	1246	reverse	3.48179e-168	1839
961	2094322	2095522	5001416	5002611	1201	1196	forward	4.36674e-168	1838
962	9315036	9316393	9538414	9539774	1358	1361	forward	5.47663e-168	1837
963	7305280	7303652	4459952	4461622	1629	1671	reverse	6.86861e-168	1836
964	5103024	5104207	10837213	10838396	1184	1184	forward	8.6144e-168	1835
965	7244421	7243169	4169893	4171148	1253	1256	reverse	1.35499e-167	1833
966	4426290	4425300	4804069	4805059	991	991	reverse	1.35499e-167	1833
967	10032131	10031511	1514286	1514906	621	621	reverse	2.13131e-167	1831
968	6069543	6070742	2494430	2495629	1200	1200	forward	2.13131e-167	1831
969	4929302	4930146	10757808	10758652	845	845	forward	2.13131e-167	1831
970	5202180	5201164	10996095	10997112	1017	1018	reverse	4.2045e-167	1828
971	2774618	2775645	2861344	2862362	1028	1019	forward	4.2045e-167	1828
972	9826545	9828067	7334180	7335744	1523	1565	forward	4.2045e-167	1828
973	185223	184513	191981	192691	711	711	reverse	5.27315e-167	1827
974	2743251	2742678	9053717	9054290	574	574	reverse	5.27315e-167	1827
975	5099711	5098888	10594682	10595502	824	821	reverse	6.61342e-167	1826
976	6289771	6291249	3123090	3124567	1479	1478	forward	6.61342e-167	1826
977	970259	971440	5049194	5050385	1182	1192	forward	6.61342e-167	1826
978	523030	521061	11248492	11250482	1970	1991	reverse	1.63625e-166	1822
979	4566623	4567739	7914692	7915796	1117	1105	forward	1.63625e-166	1822
980	10509273	10508289	8701315	8702299	985	985	reverse	4.04829e-166	1818
981	141481	142286	4375791	4376596	806	806	forward	4.04829e-166	1818
982	7869285	7867801	9419575	9421061	1485	1487	reverse	6.3677e-166	1816
983	460139	461275	741058	742191	1137	1134	forward	7.98617e-166	1815
984	8697656	8698758	2399044	2400117	1103	1074	forward	1.0016e-165	1814
985	10968961	10968328	8250157	8250790	634	634	reverse	2.47809e-165	1810
986	1540464	1539660	6518501	6519305	805	805	reverse	3.10794e-165	1809
987	4100999	4100232	7958291	7959058	768	768	reverse	4.8886e-165	1807
988	9850999	9849120	3556240	3558158	1880	1919	reverse	7.68945e-165	1805
989	4156320	4155465	7827330	7828185	856	856	reverse	7.68945e-165	1805
990	870471	869583	9458049	9458941	889	893	reverse	9.64387e-165	1804
991	9541308	9542027	5770205	5770924	720	720	forward	9.64387e-165	1804
992	783833	782428	1371420	1372834	1406	1415	reverse	1.2095e-164	1803
993	4546321	4545690	236585	237216	632	632	reverse	1.51692e-164	1802
994	10617319	10618108	4744418	4745207	790	790	forward	1.51692e-164	1802
995	185268	184551	429026	429760	718	735	reverse	2.38602e-164	1800
996	4762284	4761260	6381488	6382509	1025	1022	reverse	3.75306e-164	1798
997	2809147	2810280	1974461	1975599	1134	1139	forward	3.75306e-164	1798
998	6308617	6309844	3144170	3145394	1228	1225	forward	4.70697e-164	1797
999	5363822	5364468	6938512	6939158	647	647	forward	4.70697e-164	1797
1000	2325919	2324699	4704288	4705508	1221	1221	reverse	5.90333e-164	1796
1001	2717152	2718240	4967971	4969050	1089	1080	forward	5.90333e-164	1796
1002	5626437	5625453	1805222	1806206	985	985	reverse	7.40376e-164	1795
1003	240311	240965	11297733	11298385	655	653	forward	7.40376e-164	1795
1004	3975090	3977217	7743609	7745736	2128	2128	forward	1.16457e-163	1793
1005	8585935	8584272	4678638	4680367	1664	1730	reverse	1.46056e-163	1792
1006	3590722	3589912	7944320	7945127	811	808	reverse	1.83179e-163	1791
1007	6828313	6829709	1866437	1867830	1397	1394	forward	1.83179e-163	1791
1008	3856694	3858115	3280829	3282241	1422	1413	forward	1.83179e-163	1791
1009	2973060	2973649	8581535	8582124	590	590	forward	2.29737e-163	1790
1010	8415233	8414337	6655935	6656831	897	897	reverse	3.61362e-163	1788
1011	7095316	7094112	9328021	9329219	1205	1199	reverse	3.61362e-163	1788
1012	9869215	9868132	7412397	7413474	1084	1078	reverse	5.68399e-163	1786
1013	8066903	8068018	224539	225626	1116	1088	forward	7.12868e-163	1785
1014	7313267	7314042	4451445	4452223	776	779	forward	7.12868e-163	1785
1015	5923511	5922093	2271295	2272710	1419	1416	reverse	8.94057e-163	1784
1016	8396015	8394839	2724245	2725412	1177	1168	reverse	8.94057e-163	1784
1017	4044437	4042505	8030513	8032422	1933	1910	reverse	8.94057e-163	1784
1018	10552838	10553752	8940111	8941022	915	912	forward	8.94057e-163	1784
1019	1020124	1019424	6799622	6800325	701	704	reverse	1.1213e-162	1783
1020	2715662	2716232	4963906	4964477	571	572	forward	1.1213e-162	1783
1021	10118888	10120165	4470147	4471439	1278	1293	forward	1.76373e-162	1781
1022	3363107	3364150	11334683	11335730	1044	1048	forward	1.76373e-162	1781
1023	10693789	10692252	3318409	3319897	1538	1489	reverse	2.21201e-162	1780
1024	6340000	6339190	9201465	9202290	811	826	reverse	3.47936e-162	1778
1025	3460529	3459894	10781337	10781975	636	639	reverse	3.47936e-162	1778
1026	2797981	2798862	2886119	2887000	882	882	forward	5.47281e-162	1776
1027	9282252	9283300	7117818	7118866	1049	1049	forward	5.47281e-162	1776
1028	1395439	1394398	714143	715184	1042	1042	reverse	8.60839e-162	1774
1029	4768494	4767778	5156050	5156766	717	717	reverse	8.60839e-162	1774
1030	11041436	11040778	9027678	9028336	659	659	reverse	8.60839e-162	1774
1031	8375231	8374324	9391970	9392876	908	907	reverse	8.60839e-162	1774
1032	9723378	9724469	7303207	7304347	1092	1141	forward	8.60839e-162	1774
1033	9424004	9425423	1713570	1714998	1420	1429	forward	1.35405e-161	1772
1034	2877375	2876504	2965456	2966327	872	872	reverse	1.6982e-161	1771
1035	6628971	6627928	3835282	3836327	1044	1046	reverse	2.12983e-161	1770
1036	3292552	3293199	3944740	3945384	648	645	forward	4.20157e-161	1767
1037	4143721	4142715	4800946	4801952	1007	1007	reverse	6.60881e-161	1765
1038	9190055	9191277	3907722	3908941	1223	1220	forward	8.28855e-161	1764
1039	2532826	2534021	10415460	10416652	1196	1193	forward	8.28855e-161	1764
1040	5883340	5882717	5462693	5463318	624	626	reverse	1.30374e-160	1762
1041	2171738	2172812	10554401	10555466	1075	1066	forward	1.63511e-160	1761
1042	9291239	9292812	10684104	10685659	1574	1556	forward	1.63511e-160	1761
1043	10484852	10483544	10961959	10963264	1309	1306	reverse	2.0507e-160	1760
1044	7461361	7462645	3816489	3817774	1285	1286	forward	2.0507e-160	1760
1045	337598	338143	5687665	5688210	546	546	forward	2.57192e-160	1759
1046	7120164	7121469	5360164	5361475	1306	1312	forward	3.22562e-160	1758
1047	1135630	1136418	4911182	4911961	789	780	forward	4.04547e-160	1757
1048	9317026	9317630	454756	455359	605	604	forward	5.07369e-160	1756
1049	6409984	6410800	7598436	7599249	817	814	forward	7.9806e-160	1754
1050	5642570	5641498	1791931	1793017	1073	1087	reverse	1.0009e-159	1753
1051	10167586	10166607	10018732	10019714	980	983	reverse	1.0009e-159	1753
1052	6858720	6857649	7275411	7276476	1072	1066	reverse	1.57436e-159	1751
1053	2148539	2146668	9310027	9311922	1872	1896	reverse	1.57436e-159	1751
1054	9364609	9363768	10927358	10928199	842	842	reverse	1.97451e-159	1750
1055	3459894	3460437	4963906	4964449	544	544	forward	2.47636e-159	1749
1056	8532424	8531516	763257	764164	909	908	reverse	3.10577e-159	1748
1057	2759817	2760882	2845561	2846619	1066	1059	forward	7.68409e-159	1744
1058	8960870	8959469	458777	460207	1402	1431	reverse	9.63714e-159	1743
1059	1072806	1071478	1707012	1708346	1329	1335	reverse	9.63714e-159	1743
1060	7204225	7202845	5336193	5337567	1381	1375	reverse	9.63714e-159	1743
1061	9624090	9624915	4237958	4238782	826	825	forward	9.63714e-159	1743
1062	9678008	9679025	4294967	4295989	1018	1023	forward	9.63714e-159	1743
1063	5977603	5979308	9911810	9913511	1706	1702	forward	1.51586e-158	1741
1064	240864	240311	4162731	4163284	554	554	reverse	2.38436e-158	1739
1065	2965577	2966578	9044825	9045826	1002	1002	forward	2.99038e-158	1738
1066	2979428	2981155	9060625	9062392	1728	1768	forward	3.75044e-158	1737
1067	6353828	6352757	9184098	9185169	1072	1072	reverse	5.89921e-158	1735
1068	3002897	3004222	1584239	1585560	1326	1322	forward	5.89921e-158	1735
1069	5239865	5240935	7386409	7387479	1071	1071	forward	5.89921e-158	1735
1070	5097255	5096136	10596734	10597853	1120	1120	reverse	9.27909e-158	1733
1071	1749875	1748672	10136615	10137815	1204	1201	reverse	2.87928e-157	1728
1072	1565792	1567309	1600413	1601927	1518	1515	forward	3.6111e-157	1727
1073	7154667	7155960	5401145	5402370	1294	1226	forward	3.6111e-157	1727
1074	5970003	5971458	9903385	9904843	1456	1459	forward	5.68003e-157	1725
1075	9173602	9174369	4519962	4520729	768	768	forward	8.93433e-157	1723
1076	3267176	3266090	10369844	10370931	1087	1088	reverse	1.12052e-156	1722
1077	513530	514358	11196554	11197379	829	826	forward	1.12052e-156	1722
1078	1063348	1063928	6104452	6105031	581	580	forward	1.7625e-156	1720
1079	5136966	5138325	3160666	3162010	1360	1345	forward	2.21047e-156	1719
1080	5637611	5636325	1793704	1794986	1287	1283	reverse	2.7723e-156	1718
1081	1711416	1710310	11021060	11022160	1107	1101	reverse	2.7723e-156	1718
1082	10560952	10562356	8948285	8949644	1405	1360	forward	8.60239e-156	1713
1083	2721416	2722360	4971969	4972907	945	939	forward	1.3531e-155	1711
1084	397788	398746	7840222	7841177	959	956	forward	1.3531e-155	1711
1085	2162918	2164183	9348129	9349415	1266	1287	forward	1.3531e-155	1711
1086	5750812	5749388	4544450	4545874	1425	1425	reverse	2.6693e-155	1708
1087	3897019	3898133	6601589	6602703	1115	1115	forward	2.6693e-155	1708
1088	6001975	6003173	9926025	9927236	1199	1212	forward	2.6693e-155	1708
1089	5319738	5320842	1520856	1521961	1105	1106	forward	4.19864e-155	1706
1090	5214945	5213566	3248828	3250207	1380	1380	reverse	6.6042e-155	1704
1091	5175491	5176052	3200706	3201267	562	562	forward	6.6042e-155	1704
1092	2356527	2355548	6433134	6434109	980	976	reverse	8.28277e-155	1703
1093	3292626	3293152	5589602	5590128	527	527	forward	8.28277e-155	1703
1094	2926483	2925247	1679916	1681152	1237	1237	reverse	1.0388e-154	1702
1095	8929109	8928187	7507104	7508026	923	923	reverse	1.30283e-154	1701
1096	7220452	7221896	3738131	3739475	1445	1345	forward	1.30283e-154	1701
1097	9649900	9650874	4262768	4263742	975	975	forward	1.30283e-154	1701
1098	8318488	8317394	7037316	7038410	1095	1095	reverse	1.63397e-154	1700
1099	5255654	5254868	683524	684307	787	784	reverse	2.04927e-154	1699
1100	2716226	2715612	10781409	10782027	615	619	reverse	3.22337e-154	1697
1101	7498235	7499390	8950702	8951857	1156	1156	forward	6.35883e-154	1694
1102	1546877	1546168	6509422	6510135	710	714	reverse	7.97504e-154	1693
1103	8951400	8950878	469308	469829	523	522	reverse	1.25442e-153	1691
1104	177247	178710	938993	940453	1464	1461	forward	1.25442e-153	1691
1105	8776056	8777313	4130671	4131928	1258	1258	forward	1.57326e-153	1690
1106	3428692	3427386	10810336	10811663	1307	1328	reverse	3.10361e-153	1687
1107	7251293	7250733	4162729	4163289	561	561	reverse	4.88178e-153	1685
1108	7033542	7034606	5268310	5269368	1065	1059	forward	4.88178e-153	1685
1109	4177046	4178012	758051	759014	967	964	forward	6.12257e-153	1684
1110	10476733	10477748	8989272	8990284	1016	1013	forward	6.12257e-153	1684
1111	10433102	10431500	9008083	9009664	1603	1582	reverse	7.67873e-153	1683
1112	5690701	5692126	10972035	10973473	1426	1439	forward	9.63042e-153	1682
1113	3793989	3792941	3649091	3650133	1049	1043	reverse	1.20782e-152	1681
1114	4464114	4463122	159254	160240	993	987	reverse	1.5148e-152	1680
1115	930378	929670	6281726	6282434	709	709	reverse	1.89982e-152	1679
1116	7976268	7977020	1766103	1766855	753	753	forward	2.38269e-152	1678
1117	5316289	5317904	6703794	6705353	1616	1560	forward	2.38269e-152	1678
1118	11173410	11172291	3000057	3001183	1120	1127	reverse	3.74783e-152	1676
1119	1615992	1615000	7880261	7881253	993	993	reverse	3.74783e-152	1676
1120	5846752	5848115	6825115	6826478	1364	1364	forward	4.7004e-152	1675
1121	2103235	2104220	665681	666666	986	986	forward	5.8951e-152	1674
1122	291566	290550	6546720	6547736	1017	1017	reverse	7.39344e-152	1673
1123	6974996	6973924	451596	452668	1073	1073	reverse	9.27262e-152	1672
1124	7775692	7775203	469340	469829	490	490	reverse	9.27262e-152	1672
1125	10077623	10076282	3573649	3575004	1342	1356	reverse	9.27262e-152	1672
1126	5176054	5175474	6104453	6105033	581	581	reverse	9.27262e-152	1672
1127	1019446	1020114	5560154	5560822	669	669	forward	1.16294e-151	1671
1128	4756886	4756046	6386164	6387005	841	842	reverse	1.45852e-151	1670
1129	8632513	8633432	1333207	1334128	920	922	forward	1.45852e-151	1670
1130	7721927	7721151	5496011	5496784	777	774	reverse	1.82923e-151	1669
1131	8805544	8806523	4043879	4044861	980	983	forward	1.82923e-151	1669
1132	7250738	7251292	11297733	11298287	555	555	forward	2.29417e-151	1668
1133	254128	252715	6582038	6583450	1414	1413	reverse	2.87727e-151	1667
1134	1427940	1429199	7222781	7223995	1260	1215	forward	3.60858e-151	1666
1135	3950505	3951395	6215355	6216245	891	891	forward	4.52577e-151	1665
1136	387668	388186	5589610	5590128	519	519	forward	5.67607e-151	1664
1137	5333523	5334881	8882063	8883418	1359	1356	forward	5.67607e-151	1664
1138	8616112	8615062	11408489	11409536	1051	1048	reverse	7.11875e-151	1663
1139	3833533	3834625	6816961	6818059	1093	1099	forward	7.11875e-151	1663
1140	1225902	1224677	9145807	9147035	1226	1229	reverse	1.40433e-150	1660
1141	7250732	7251295	881396	881958	564	563	forward	1.76127e-150	1659
1142	8008129	8009270	6957204	6958351	1142	1148	forward	1.76127e-150	1659
1143	11089593	11088032	3998176	3999729	1562	1554	reverse	2.20893e-150	1658
1144	10566663	10567313	209849	210498	651	650	forward	2.20893e-150	1658
1145	5981627	5983068	642870	644382	1442	1513	forward	2.77037e-150	1657
1146	1470379	1469861	1123876	1124394	519	519	reverse	3.47451e-150	1656
1147	2599404	2600672	10474028	10475293	1269	1266	forward	8.59639e-150	1652
1148	1063915	1063341	3200703	3201277	575	575	reverse	1.07813e-149	1651
1149	3415625	3416437	10585080	10585892	813	813	forward	1.07813e-149	1651
1150	387668	388199	3944816	3945347	532	532	forward	1.35216e-149	1650
1151	2969230	2969992	9049125	9049889	763	765	forward	1.35216e-149	1650
1152	2161169	2162285	9346465	9347581	1117	1117	forward	1.35216e-149	1650
1153	10984199	10983231	8234477	8235436	969	960	reverse	1.69583e-149	1649
1154	7004322	7003000	5241988	5243313	1323	1326	reverse	2.66744e-149	1647
1155	6553750	6552773	3359920	3360890	978	971	reverse	4.19571e-149	1645
1156	10993646	10992502	8225580	8226722	1145	1143	reverse	6.59959e-149	1643
1157	395797	395261	3358842	3359383	537	542	reverse	8.277e-149	1642
1158	10951408	10952521	8411842	8412955	1114	1114	forward	1.30192e-148	1640
1159	8666576	8667738	2367748	2368924	1163	1177	forward	2.04784e-148	1638
1160	4780982	4782250	6295706	6296978	1269	1273	forward	2.56833e-148	1637
1161	1592365	1593682	6662227	6663537	1318	1311	forward	2.56833e-148	1637
1162	9672611	9673749	4288106	4289235	1139	1130	forward	5.06662e-148	1634
1163	9285653	9287253	7121538	7123154	1601	1617	forward	5.06662e-148	1634
1164	5009901	5011341	7689077	7690555	1441	1479	forward	6.35439e-148	1633
1165	3361368	3362137	11329001	11329770	770	770	forward	9.99506e-148	1631
1166	4123456	4122954	8040246	8040741	503	496	reverse	1.97175e-147	1628
1167	3873602	3872746	6630357	6631213	857	857	reverse	2.47291e-147	1627
1168	8005295	8003957	24054	25422	1339	1369	reverse	3.10144e-147	1626
1169	6295087	6293548	3921938	3923469	1540	1532	reverse	3.88973e-147	1625
1170	7190491	7190975	10156770	10157255	485	486	forward	3.88973e-147	1625
1171	2208617	2207467	2449785	2450941	1151	1157	reverse	6.1183e-147	1623
1172	3770352	3771244	5047365	5048257	893	893	forward	6.1183e-147	1623
1173	6778785	6776912	7169119	7170997	1874	1879	reverse	9.62371e-147	1621
1174	11008127	11007397	9001267	9001997	731	731	reverse	9.62371e-147	1621
1175	984398	985142	2188691	2189435	745	745	forward	9.62371e-147	1621
1176	3523746	3524804	3509040	3510098	1059	1059	forward	1.51375e-146	1619
1177	4595326	4593677	5989887	5991530	1650	1644	reverse	2.38103e-146	1617
1178	10243583	10242909	4390974	4391648	675	675	reverse	7.38828e-146	1612
1179	279855	278005	6559129	6560956	1851	1828	reverse	7.38828e-146	1612
1180	3710784	3709724	6733367	6734433	1061	1067	reverse	7.38828e-146	1612
1181	5859722	5858486	7868317	7869493	1237	1177	reverse	9.26615e-146	1611
1182	1664717	1665984	7040552	7041822	1268	1271	forward	9.26615e-146	1611
1183	8773968	8774942	4128743	4129766	975	1024	forward	1.16213e-145	1610
1184	3851102	3849922	3292563	3293743	1181	1181	reverse	1.45751e-145	1609
1185	2323285	2322526	4706866	4707637	760	772	reverse	1.45751e-145	1609
1186	5618318	5617212	1814723	1815832	1107	1110	reverse	1.82796e-145	1608
1187	11029037	11027825	1628349	1629564	1213	1216	reverse	2.29257e-145	1607
1188	2601515	2602603	10475822	10476892	1089	1071	forward	2.29257e-145	1607
1189	8220603	8219683	8557220	8558164	921	945	reverse	2.87526e-145	1606
1190	1214132	1215195	10187159	10188243	1064	1085	forward	2.87526e-145	1606
1191	2361681	2360732	6428545	6429483	950	939	reverse	3.60606e-145	1605
1192	3584887	3583741	8018021	8019167	1147	1147	reverse	3.60606e-145	1605
1193	3095686	3097133	593817	595261	1448	1445	forward	3.60606e-145	1605
1194	2755871	2756700	2842335	2843158	830	824	forward	3.60606e-145	1605
1195	2802112	2803299	1968116	1969297	1188	1182	forward	4.52261e-145	1604
1196	7889583	7890634	5115964	5117018	1052	1055	forward	4.52261e-145	1604
1197	367393	368350	5570327	5571284	958	958	forward	5.67211e-145	1603
1198	3034026	3034786	7565737	7566497	761	761	forward	5.67211e-145	1603
1199	1558131	1559106	1593139	1594117	976	979	forward	8.92188e-145	1601
1200	6761278	6760151	7185571	7186713	1128	1143	reverse	1.40336e-144	1599
1201	6656848	6658122	2517814	2519088	1275	1275	forward	1.40336e-144	1599
1202	9366623	9367644	10317696	10318714	1022	1019	forward	1.40336e-144	1599
1203	4633572	4632291	9328011	9329280	1282	1270	reverse	2.20739e-144	1597
1204	817915	818724	426757	427566	810	810	forward	3.47209e-144	1595
1205	9283849	9284996	7119663	7120845	1148	1183	forward	4.35458e-144	1594
1206	7676724	7677870	990272	991418	1147	1147	forward	5.46137e-144	1593
1207	10813247	10814779	8830165	8831712	1533	1548	forward	5.46137e-144	1593
1208	3046564	3045581	2307970	2308951	984	982	reverse	8.59039e-144	1591
1209	388475	389205	5590469	5591202	731	734	forward	8.59039e-144	1591
1210	6508427	6507437	10736481	10737474	991	994	reverse	1.07738e-143	1590
1211	189172	188357	931310	932125	816	816	reverse	1.35122e-143	1589
1212	7649977	7648484	2164861	2166351	1494	1491	reverse	1.35122e-143	1589
1213	4011567	4012413	7994892	7995742	847	851	forward	1.35122e-143	1589
1214	6580515	6579444	1899941	1900993	1072	1053	reverse	2.66558e-143	1586
1215	2334670	2335228	1464341	1464899	559	559	forward	2.66558e-143	1586
1216	7301953	7300818	438942	440077	1136	1136	reverse	4.19279e-143	1584
1217	7190491	7190964	9613357	9613830	474	474	forward	4.19279e-143	1584
1218	3938907	3939397	8720013	8720503	491	491	forward	1.30101e-142	1579
1219	1090200	1091944	11206168	11207856	1745	1689	forward	1.30101e-142	1579
1220	8523952	8524735	9552009	9552786	784	778	forward	1.63169e-142	1578
1221	5856057	5854637	7871946	7873346	1421	1401	reverse	2.04641e-142	1577
1222	1336901	1335112	6365033	6366814	1790	1782	reverse	3.21888e-142	1575
1223	7887960	7889066	5114341	5115447	1107	1107	forward	4.03701e-142	1574
1224	4414087	4415228	8447164	8448299	1142	1136	forward	4.03701e-142	1574
1225	1189285	1188318	10106360	10107327	968	968	reverse	6.34996e-142	1572
1226	10155557	10154641	10689565	10690475	917	911	reverse	7.96392e-142	1571
1227	10513553	10514527	2340252	2341226	975	975	forward	7.96392e-142	1571
1228	2334664	2335231	5024149	5024719	568	571	forward	7.96392e-142	1571
1229	929667	930379	5156051	5156763	713	713	forward	7.96392e-142	1571
1230	10593579	10594116	5211713	5212248	538	536	forward	7.96392e-142	1571
1231	170513	169214	9950538	9951838	1300	1301	reverse	1.25267e-141	1569
1232	6306977	6307935	3142259	3143215	959	957	forward	1.25267e-141	1569
1233	4122956	4123420	11040541	11041001	465	461	forward	1.25267e-141	1569
1234	1626123	1625688	9613384	9613819	436	436	reverse	1.57106e-141	1568
1235	3685209	3684453	5976669	5977431	757	763	reverse	1.97038e-141	1567
1236	7871048	7869746	9417685	9418987	1303	1303	reverse	1.97038e-141	1567
1237	10593579	10594053	5154382	5154856	475	475	forward	2.47119e-141	1566
1238	1626148	1625688	10156775	10157232	461	458	reverse	3.09928e-141	1565
1239	4725575	4724431	6415705	6416843	1145	1139	reverse	4.87498e-141	1563
1240	3940839	3939821	10910654	10911661	1019	1008	reverse	4.87498e-141	1563
1241	1272257	1273809	8830206	8831763	1553	1558	forward	6.11404e-141	1562
1242	2865941	2865055	2976604	2977491	887	888	reverse	7.66803e-141	1561
1243	5760272	5761192	11425702	11426622	921	921	forward	7.66803e-141	1561
1244	4492976	4491811	7768333	7769499	1166	1167	reverse	9.617e-141	1560
1245	10123812	10125055	3587586	3588841	1244	1256	forward	1.20613e-140	1559
1246	7096043	7097360	5338244	5339561	1318	1318	forward	1.20613e-140	1559
1247	6016218	6017143	9938168	9939099	926	932	forward	1.20613e-140	1559
1248	1754415	1756368	5516984	5518925	1954	1942	forward	1.51269e-140	1558
1249	8522655	8523302	9550775	9551422	648	648	forward	1.89717e-140	1557
1250	1405400	1403362	420877	422920	2039	2044	reverse	2.37937e-140	1556
1251	9955620	9956554	3405739	3406670	935	932	forward	2.37937e-140	1556
1252	10383246	10382669	5024145	5024725	578	581	reverse	2.98413e-140	1555
1253	6822527	6823766	7126786	7128028	1240	1243	forward	2.98413e-140	1555
1254	1175841	1175053	10120762	10121556	789	795	reverse	3.7426e-140	1554
1255	2422840	2421957	10273236	10274167	884	932	reverse	3.7426e-140	1554
1256	3221760	3221281	11040539	11041013	480	475	reverse	3.7426e-140	1554
1257	1438709	1437541	7670631	7671786	1169	1156	reverse	4.69385e-140	1553
1258	1432399	1431086	7674279	7675530	1314	1252	reverse	4.69385e-140	1553
1259	3283850	3282859	3939356	3940344	992	989	reverse	5.88688e-140	1552
1260	9983862	9984821	6887267	6888180	960	914	forward	7.38313e-140	1551
1261	7838933	7837555	2761511	2762921	1379	1411	reverse	1.45649e-139	1548
1262	9360692	9360240	10931891	10932343	453	453	reverse	1.82668e-139	1547
1263	8607450	8606158	3754892	3756187	1293	1296	reverse	4.51946e-139	1543
1264	3939400	3938888	5545545	5546058	513	514	reverse	7.10882e-139	1541
1265	9360694	9360238	5687748	5688204	457	457	reverse	7.10882e-139	1541
1266	4735150	4734395	6405903	6406658	756	756	reverse	7.10882e-139	1541
1267	6362968	6362053	9172831	9173743	916	913	reverse	7.10882e-139	1541
1268	8398615	8399596	10757832	10758819	982	988	forward	7.10882e-139	1541
1269	9321021	9321584	8719929	8720499	564	571	forward	1.40238e-138	1538
1270	6088213	6087390	2492525	2493348	824	824	reverse	1.75882e-138	1537
1271	10590947	10591839	5208486	5209383	893	898	forward	1.75882e-138	1537
1272	10513827	10514567	9128590	9129324	741	735	forward	2.20585e-138	1536
1273	10366871	10367334	5942252	5942715	464	464	forward	2.76651e-138	1535
1274	4654653	4657814	2223905	2227069	3162	3165	forward	3.46966e-138	1534
1275	11181131	11180365	2991993	2992759	767	767	reverse	8.58441e-138	1530
1276	3221296	3221760	8040279	8040740	465	462	forward	8.58441e-138	1530
1277	4651529	4650337	6371183	6372375	1193	1193	reverse	1.07663e-137	1529
1278	10022778	10023279	6932748	6933253	502	506	forward	1.07663e-137	1529
1279	337671	338138	10931879	10932346	468	468	forward	1.07663e-137	1529
1280	7321204	7322080	59988	60864	877	877	forward	1.69347e-137	1527
1281	928354	928848	5154362	5154856	495	495	forward	2.12389e-137	1526
1282	4425673	4424836	4804686	4805525	838	840	reverse	2.66372e-137	1525
1283	6835917	6836784	5689419	5690283	868	865	forward	5.25479e-137	1522
1284	6750477	6751473	413145	414148	997	1004	forward	6.59039e-137	1521
1285	6554721	6554223	3358884	3359383	499	500	reverse	8.26546e-137	1520
1286	10447405	10446445	4944815	4945775	961	961	reverse	8.26546e-137	1520
1287	10605182	10604264	8681994	8682903	919	910	reverse	8.26546e-137	1520
1288	9793102	9791710	11096676	11098060	1393	1385	reverse	8.26546e-137	1520
1289	4540567	4542621	6446607	6448655	2055	2049	forward	1.03663e-136	1519
1290	2929331	2928400	1676443	1677374	932	932	reverse	1.30011e-136	1518
1291	6323452	6322748	9219248	9219955	705	708	reverse	1.30011e-136	1518
1292	5706585	5707956	9998908	10000288	1372	1381	forward	1.63055e-136	1517
1293	953161	954528	5179165	5180532	1368	1368	forward	2.04498e-136	1516
1294	8012268	8013575	4544450	4545757	1308	1308	forward	2.56475e-136	1515
1295	928325	928847	5211669	5212186	523	518	forward	2.56475e-136	1515
1296	4122062	4121309	8041816	8042569	754	754	reverse	3.21663e-136	1514
1297	8285175	8286512	8147391	8148680	1338	1290	forward	3.21663e-136	1514
1298	5024828	5023624	11233965	11235169	1205	1205	reverse	4.0342e-136	1513
1299	9587063	9588221	11146809	11147952	1159	1144	forward	4.0342e-136	1513
1300	4855115	4854364	8576726	8577477	752	752	reverse	5.05956e-136	1512
1301	5203989	5205491	8788845	8790315	1503	1471	forward	5.05956e-136	1512
1302	2667681	2669304	10684121	10685737	1624	1617	forward	5.05956e-136	1512
1303	1110681	1111653	4891509	4892481	973	973	forward	6.34554e-136	1511
1304	361650	360906	6799551	6800295	745	745	reverse	7.95837e-136	1510
1305	8750407	8751266	139285	140141	860	857	forward	7.95837e-136	1510
1306	10624774	10625761	4754734	4755727	988	994	forward	7.95837e-136	1510
1307	4632188	4633609	10139614	10141035	1422	1422	forward	7.95837e-136	1510
1308	395261	395739	5597777	5598255	479	479	forward	1.2518e-135	1508
1309	1363562	1362312	2517814	2519064	1251	1251	reverse	1.56997e-135	1507
1310	1401632	1400363	424082	425350	1270	1269	reverse	1.969e-135	1506
1311	5245070	5245725	696895	697565	656	671	forward	3.09712e-135	1504
1312	5723742	5724662	3300529	3301443	921	915	forward	3.88431e-135	1503
1313	376555	377551	5578212	5579208	997	997	forward	3.88431e-135	1503
1314	4841133	4840596	6259098	6259634	538	537	reverse	6.10977e-135	1501
1315	10734852	10733411	7773681	7775116	1442	1436	reverse	6.10977e-135	1501
1316	2900168	2899317	2938141	2939001	852	861	reverse	9.61029e-135	1499
1317	6473118	6472309	1924217	1925023	810	807	reverse	1.20529e-134	1498
1318	4470876	4471975	825021	826115	1100	1095	forward	1.20529e-134	1498
1319	8823543	8824886	4068034	4069386	1344	1353	forward	1.20529e-134	1498
1320	4537147	4535587	245766	247335	1561	1570	reverse	1.89585e-134	1496
1321	5362805	5363236	6932827	6933258	432	432	forward	1.89585e-134	1496
1322	5882150	5881274	5463865	5464740	877	876	reverse	3.73999e-134	1493
1323	9498804	9497852	11249277	11250232	953	956	reverse	5.88277e-134	1491
1324	10023279	10022852	1515513	1515940	428	428	reverse	9.25323e-134	1489
1325	9253410	9251708	6071502	6073204	1703	1703	reverse	9.25323e-134	1489
1326	726015	727116	7620769	7621873	1102	1105	forward	1.45548e-133	1487
1327	5239907	5240939	10207336	10208367	1033	1032	forward	1.82541e-133	1486
1328	972477	973587	5051673	5052785	1111	1113	forward	2.28937e-133	1485
1329	7606812	7605700	10494959	10496056	1113	1098	reverse	2.87126e-133	1484
1330	3289608	3288246	3934360	3935736	1363	1377	reverse	4.51631e-133	1482
1331	2890307	2889124	2947945	2949128	1184	1184	reverse	5.66421e-133	1481
1332	8965979	8966837	6228580	6229444	859	865	forward	7.10386e-133	1480
1333	5350479	5351424	8816046	8816988	946	943	forward	7.10386e-133	1480
1334	2165752	2166370	9351339	9351957	619	619	forward	7.10386e-133	1480
1335	5224466	5223352	3239173	3240280	1115	1108	reverse	8.90944e-133	1479
1336	10050907	10049929	11385026	11386007	979	982	reverse	8.90944e-133	1479
1337	6295069	6293570	2313032	2314553	1500	1522	reverse	1.4014e-132	1477
1338	3543494	3542500	3478331	3479324	995	994	reverse	1.4014e-132	1477
1339	5892281	5893107	562180	563006	827	827	forward	1.4014e-132	1477
1340	7557143	7555700	2794857	2796297	1444	1441	reverse	2.76458e-132	1474
1341	10329897	10331226	627826	629146	1330	1321	forward	2.76458e-132	1474
1342	4797649	4798646	6312239	6313236	998	998	forward	2.76458e-132	1474
1343	7918155	7919269	6988807	6989925	1115	1119	forward	2.76458e-132	1474
1344	1319106	1320240	2210783	2211917	1135	1135	forward	3.46724e-132	1473
1345	616335	615114	8794031	8795220	1222	1190	reverse	4.34851e-132	1472
1346	3405687	3404738	9357332	9358287	950	956	reverse	6.83993e-132	1470
1347	610686	609406	2197863	2199140	1281	1278	reverse	1.34933e-131	1467
1348	3077615	3076691	2291140	2292064	925	925	reverse	1.34933e-131	1467
1349	3438084	3437129	10803464	10804419	956	956	reverse	1.34933e-131	1467
1350	4828685	4827583	6275353	6276464	1103	1112	reverse	1.69229e-131	1466
1351	10859072	10860080	7711689	7712697	1009	1009	forward	2.12241e-131	1465
1352	8800196	8799409	4100225	4101015	788	791	reverse	3.33842e-131	1463
1353	7157387	7158336	5403390	5404330	950	941	forward	3.33842e-131	1463
1354	4406578	4405638	43148	44091	941	944	reverse	4.18694e-131	1462
1355	7057987	7058443	1073958	1074414	457	457	forward	6.5858e-131	1460
1356	11085579	11084406	4577808	4578984	1174	1177	reverse	1.0359e-130	1458
1357	4424869	4426288	11312728	11314148	1420	1421	forward	1.0359e-130	1458
1358	9321584	9321103	5545552	5546036	482	485	reverse	1.62941e-130	1456
1359	7356055	7355030	9833998	9834998	1026	1001	reverse	1.62941e-130	1456
1360	3314326	3314781	2111468	2111923	456	456	forward	1.62941e-130	1456
1361	3622750	3623218	8064530	8064992	469	463	forward	5.05603e-130	1451
1362	10069873	10068842	3582586	3583620	1032	1035	reverse	6.34111e-130	1450
1363	8104104	8104890	11267173	11267956	787	784	forward	7.95282e-130	1449
1364	9401974	9401038	1407557	1408490	937	934	reverse	9.97417e-130	1448
1365	7961854	7960068	8709143	8710932	1787	1790	reverse	9.97417e-130	1448
1366	3012891	3011575	2341569	2342867	1317	1299	reverse	1.56887e-129	1446
1367	572741	573647	2011078	2011987	907	910	forward	1.56887e-129	1446
1368	1440540	1441876	11082747	11084086	1337	1340	forward	1.56887e-129	1446
1369	2846853	2846219	2905195	2905835	635	641	reverse	2.46774e-129	1444
1370	11001872	11002986	9405848	9406953	1115	1106	forward	2.46774e-129	1444
1371	5853402	5851864	7875226	7876776	1539	1551	reverse	3.09496e-129	1443
1372	3148757	3147485	6532755	6533968	1273	1214	reverse	3.8816e-129	1442
1373	8910791	8909881	7526337	7527244	911	908	reverse	4.86818e-129	1441
1374	3313642	3314096	2111696	2112150	455	455	forward	6.10551e-129	1440
1375	1321160	1322174	2212924	2213940	1015	1017	forward	7.65734e-129	1439
1376	10218197	10218917	6186336	6187056	721	721	forward	7.65734e-129	1439
1377	10012846	10013892	6920399	6921499	1047	1101	forward	9.60359e-129	1438
1378	3622743	3623166	10070405	10070825	424	421	forward	9.60359e-129	1438
1379	5213110	5212405	3250580	3251285	706	706	reverse	1.20445e-128	1437
1380	3646156	3645256	7086797	7087706	901	910	reverse	1.20445e-128	1437
1381	847188	847766	9479000	9479569	579	570	forward	1.20445e-128	1437
1382	5384858	5385761	8292912	8293811	904	900	forward	1.51058e-128	1436
1383	2092501	2093136	4999914	5000549	636	636	forward	1.89453e-128	1435
1384	618881	620553	3258622	3260330	1673	1709	forward	2.37605e-128	1434
1385	1647353	1648059	4424478	4425190	707	713	forward	2.37605e-128	1434
1386	4840665	4841127	5182576	5183037	463	462	forward	2.37605e-128	1434
1387	3708853	3708150	6735571	6736271	704	701	reverse	4.68731e-128	1431
1388	6061660	6062475	2514567	2515382	816	816	forward	5.87867e-128	1430
1389	8819391	8820184	4061623	4062410	794	788	forward	7.37284e-128	1429
1390	1584545	1585476	1617382	1618308	932	927	forward	9.24678e-128	1428
1391	9308728	9309694	9532062	9533028	967	967	forward	9.24678e-128	1428
1392	9926249	9925335	789978	790892	915	915	reverse	1.45446e-127	1426
1393	2629439	2628757	3614860	3615545	683	686	reverse	1.45446e-127	1426
1394	10331892	10332741	629798	630629	850	832	forward	1.82414e-127	1425
1395	2819419	2818212	1959743	1960953	1208	1211	reverse	2.28778e-127	1424
1396	3557326	3557742	10070408	10070821	417	414	forward	2.86925e-127	1423
1397	2150067	2148643	9308495	9309923	1425	1429	reverse	5.66026e-127	1420
1398	10649434	10650208	887999	888773	775	775	forward	5.66026e-127	1420
1399	4578282	4579656	5604130	5605497	1375	1368	forward	5.66026e-127	1420
1400	3557330	3557744	8064530	8064941	415	412	forward	5.66026e-127	1420
1401	5685521	5684481	4343332	4344378	1041	1047	reverse	8.90323e-127	1418
1402	6774131	6775101	9159312	9160284	971	973	forward	8.90323e-127	1418
1403	3623165	3622718	1826515	1826962	448	448	reverse	1.11661e-126	1417
1404	3557767	3557330	1826494	1826927	438	434	reverse	1.40042e-126	1416
1405	4055762	4056799	11285668	11286713	1038	1046	forward	1.75636e-126	1415
1406	6568918	6570152	9380998	9382229	1235	1232	forward	2.76265e-126	1413
1407	1688970	1688571	977946	978345	400	400	reverse	3.46483e-126	1412
1408	7358179	7357132	1044655	1045655	1048	1001	reverse	3.46483e-126	1412
1409	2558138	2557038	5083084	5084173	1101	1090	reverse	3.46483e-126	1412
1410	957457	956984	6259099	6259575	474	477	reverse	3.46483e-126	1412
1411	5880066	5878962	5466098	5467205	1105	1108	reverse	4.34548e-126	1411
1412	2612397	2613142	2091092	2091846	746	755	forward	5.44996e-126	1410
1413	10005282	10006355	6910737	6911807	1074	1071	forward	5.44996e-126	1410
1414	4563869	4564834	7912051	7913012	966	962	forward	5.44996e-126	1410
1415	11118872	11117975	3964371	3965268	898	898	reverse	8.57244e-126	1408
1416	7928919	7928174	3848273	3849007	746	735	reverse	1.07513e-125	1407
1417	3224050	3223388	11038098	11038760	663	663	reverse	1.07513e-125	1407
1418	6554223	6554688	5597777	5598242	466	466	forward	1.34839e-125	1406
1419	1116930	1117876	4897723	4898672	947	950	forward	1.69111e-125	1405
1420	10584955	10585931	5202454	5203439	977	986	forward	1.69111e-125	1405
1421	8021302	8020473	4828205	4829026	830	822	reverse	2.66001e-125	1403
1422	187878	186812	932649	933721	1067	1073	reverse	3.3361e-125	1402
1423	5539917	5540749	1860571	1861403	833	833	forward	3.3361e-125	1402
1424	8423889	8422810	1430353	1431444	1080	1092	reverse	4.18402e-125	1401
1425	5772075	5771037	10389707	10390754	1039	1048	reverse	4.18402e-125	1401
1426	2075865	2076768	11356183	11357086	904	904	forward	4.18402e-125	1401
1427	3085524	3084038	2283271	2284766	1487	1496	reverse	5.24747e-125	1400
1428	4930162	4929328	2721437	2722274	835	838	reverse	5.24747e-125	1400
1429	2708880	2709742	4953400	4954262	863	863	forward	5.24747e-125	1400
1430	754053	755015	7655165	7656124	963	960	forward	6.58121e-125	1399
1431	6112103	6111685	3085548	3085970	419	423	reverse	8.25394e-125	1398
1432	8953657	8953193	466337	466795	465	459	reverse	1.03518e-124	1397
1433	11150683	11149536	3019680	3020827	1148	1148	reverse	1.29829e-124	1396
1434	7080393	7081462	5322242	5323311	1070	1070	forward	1.29829e-124	1396
1435	9440421	9441381	1731902	1732862	961	961	forward	2.56118e-124	1393
1436	6978153	6979298	448374	449518	1146	1145	forward	3.21215e-124	1392
1437	787229	786323	2358520	2359428	907	909	reverse	4.02857e-124	1391
1438	107890	108994	11408426	11409530	1105	1105	forward	4.02857e-124	1391
1439	4737399	4736638	6404685	6405446	762	762	reverse	6.33669e-124	1389
1440	712500	711532	7172784	7173752	969	969	reverse	7.94727e-124	1388
1441	5722342	5721346	3261307	3262303	997	997	reverse	1.25006e-123	1386
1442	3328425	3327486	9279484	9280416	940	933	reverse	1.25006e-123	1386
1443	5606832	5607266	8064522	8064952	435	431	forward	1.25006e-123	1386
1444	2191468	2190087	2468774	2470160	1382	1387	reverse	1.96626e-123	1384
1445	3579900	3580691	8022718	8023509	792	792	forward	1.96626e-123	1384
1446	3393079	3391704	10566789	10568136	1376	1348	reverse	2.46602e-123	1383
1447	956912	957454	5182502	5183040	543	539	forward	2.46602e-123	1383
1448	10543310	10543898	8932352	8932940	589	589	forward	2.46602e-123	1383
1449	8006567	8005485	22782	23864	1083	1083	reverse	3.0928e-123	1382
1450	5283246	5284237	6672552	6673540	992	989	forward	3.0928e-123	1382
1451	8993314	8994321	11126644	11127651	1008	1008	forward	3.0928e-123	1382
1452	7666942	7667409	977960	978424	468	465	forward	4.86479e-123	1380
1453	3040319	3041702	3127372	3128731	1384	1360	forward	6.10126e-123	1379
1454	9642175	9641779	977958	978354	397	397	reverse	9.5969e-123	1377
1455	1698884	1697996	7026382	7027269	889	888	reverse	1.20361e-122	1376
1456	53124	54323	22664	23864	1200	1201	forward	1.20361e-122	1376
1457	4827595	4828679	5161543	5162627	1085	1085	forward	1.50953e-122	1375
1458	3558826	3560466	8065791	8067443	1641	1653	forward	1.50953e-122	1375
1459	3766052	3767041	4481683	4482672	990	990	forward	1.89321e-122	1374
1460	10225841	10224598	4410918	4412164	1244	1247	reverse	2.3744e-122	1373
1461	10305540	10306703	613715	614889	1164	1175	forward	2.97789e-122	1372
1462	522259	521306	1445147	1446103	954	957	reverse	3.73478e-122	1371
1463	8235441	8236425	8119580	8120582	985	1003	forward	3.73478e-122	1371
1464	4887016	4886054	378877	379836	963	960	reverse	4.68404e-122	1370
1465	9949428	9949025	3423991	3424394	404	404	reverse	4.68404e-122	1370
1466	6411515	6412358	7600061	7600904	844	844	forward	5.87457e-122	1369
1467	6112100	6111706	3424000	3424394	395	395	reverse	7.3677e-122	1368
1468	8321994	8320929	8168767	8169789	1066	1023	reverse	7.3677e-122	1368
1469	8417653	8416179	6653710	6655181	1475	1472	reverse	9.24033e-122	1367
1470	5606839	5607260	10070411	10070829	422	419	forward	1.45345e-121	1365
1471	1497945	1496900	196111	197156	1046	1046	reverse	1.82287e-121	1364
1472	810454	811315	1390826	1391687	862	862	forward	1.82287e-121	1364
1473	10867426	10866522	7980770	7981672	905	903	reverse	2.28618e-121	1363
1474	10219250	10219690	6187453	6187890	441	438	forward	2.86725e-121	1362
1475	315216	314708	4743128	4743637	509	510	reverse	3.59602e-121	1361
1476	54787	55851	24337	25422	1065	1086	forward	4.51001e-121	1360
1477	6043988	6043078	3053466	3054376	911	911	reverse	5.65631e-121	1359
1478	10042288	10043212	10516848	10517838	925	991	forward	5.65631e-121	1359
1479	937388	936302	6275361	6276450	1087	1090	reverse	7.09396e-121	1358
1480	6507455	6508366	7086804	7087715	912	912	forward	7.09396e-121	1358
1481	5759741	5760613	11425165	11426043	873	879	forward	8.89702e-121	1357
1482	2477323	2476634	2149018	2149707	690	690	reverse	1.39945e-120	1355
1483	6691746	6690499	3465852	3467147	1248	1296	reverse	1.39945e-120	1355
1484	3467760	3466880	3491815	3492689	881	875	reverse	1.75514e-120	1354
1485	9848137	9847139	3558998	3559996	999	999	reverse	2.20124e-120	1353
1486	5607269	5606839	1826499	1826928	431	430	reverse	3.46241e-120	1351
1487	6699494	6698775	3458125	3458844	720	720	reverse	5.44616e-120	1349
1488	1240111	1239162	8915202	8916154	950	953	reverse	5.44616e-120	1349
1489	2562017	2560943	10443039	10444119	1075	1081	reverse	5.44616e-120	1349
1490	8494093	8493308	11009184	11009969	786	786	reverse	5.44616e-120	1349
1491	5967794	5965747	7620112	7622156	2048	2045	reverse	8.56646e-120	1347
1492	5433915	5434815	1486587	1487486	901	900	forward	8.56646e-120	1347
1493	4641847	4642789	6032352	6033303	943	952	forward	8.56646e-120	1347
1494	3799096	3799662	7316669	7317240	567	572	forward	8.56646e-120	1347
1495	1641332	1640876	5293534	5293989	457	456	reverse	1.07438e-119	1346
1496	3184640	3185459	6872909	6873728	820	820	forward	1.07438e-119	1346
1497	5309016	5309950	6699551	6700485	935	935	forward	1.68993e-119	1344
1498	4436666	4437839	6825366	6826533	1174	1168	forward	2.11945e-119	1343
1499	332317	333512	5681849	5683056	1196	1208	forward	2.65815e-119	1342
1500	2691240	2691951	9574210	9574921	712	712	forward	2.65815e-119	1342
[truncated: 3,049 more rows]

## Sheet: S5
	Positions							Statistics
[truncated: 302 more rows]

[truncated: 12 more sheets: S6, S7, S8, S9, S10, S11, S12, S13, S14, S15, S16, S17]
